# Supplementary material for: The Iso2k database: a global compilation of paleo- δ 18 O and δ 2 H records to aid understanding of Common Era climate
Source: Copernicus journal article supplement (doi:10.5194/essd-12-2261-2020), 2020-09-23
Supplement: Supplementary file 1 [file Supplementary Materials - Tables.xlsx]

## Sheet: Table captions
Supplementary Table 1	Key metadata field entries for all primary time series records; this is a subset of the table used to create the Iso2k database serialisations. This table includes all primary timeseries in Iso2 v1.0.0; QC Level 1 fields have been certified by a member of the Iso2k project team. Column headers correspond to metadata field names described in the main text.
Supplementary Table 2	DOIs and citations for all datasets. This table contains all DOIs associated with each record in the Iso2k database, along with the full citation. Column headers correspond to metadata field names described in the main text.
Supplementary Table 3	Citations for records in the Iso2k database. This table lists the citations for all records included in v1.0.0 of the Iso2k database.

## Sheet: Supplementary Table 1
TSid	dataSetName	iso2kUI	archiveType	pub1_doi	pub1_citation	pub2_doi	pub2_citation	originalDataUrl	lat	lon	elevation	siteName	minYear	maxYear	variableName	units	description	measurementMaterial	measurementMaterialDetail	inferredMaterial	isotopeInterpretation1_basis	isotopeInterpretation1_direction	isotopeInterpretation1_variable	isotopeInterpretation1_seasonality	Iso2k primary timeseries for dataset	link to lipdverse	Iso2k QC certification (INITIALS)
Ocean2kHR_001	CO00COKY	CO00COKY01A	Coral	10.1126/science.287.5453.617	Cole, J. E.: Tropical Pacific Forcing of Decadal SST Variability in the Western Indian Ocean over the Past Two Centuries, Science, 287(5453), 617–619, doi:10.1126/science.287.5453.617, 2000.	10.1002/2014PA002716	Auer, G., Piller, W. E., Reuter, M. and Harzhauser, M.: Correlating carbon and oxygen isotope events in early to middle Miocene shallow marine carbonates in the Mediterranean region using orbitally tuned chemostratigraphy and lithostratigraphy, Paleoceanography, 30(4), 332–352, doi:10.1002/2014pa002716, 2015.	https://www.ncdc.noaa.gov/paleo/study/1855	-3.2556	40.1433	-6	Malindi Marine Park	1801	1994	d18O	permil	carbonate	coral	aragonite	surface seawater	The coral 18O record from this site reflects primarily SST; a linear regression of coral 18O versus SST yields a slope of 0.24 per mil (a€°) 18O per 1A°C, explaining 47% of the SST variance (20).	negative	T_water	annual	TRUE	http://lipdverse.org/iso2k/1_0_0/CO00COKY.html	DMT (1/14/19)
Ocean2kHR_124	CO00DRBE	CO00DRBE01A	Coral	10.1007/s005310050301	Draschba, S., Paetzold, J. and Wefer, G.: North Atlantic climate variability since AD 1350 recorded in δ 18 O and skeletal density of Bermuda corals, International Journal of Earth Sciences, 88(4), 733–741, doi:10.1007/s005310050301, 2000.			http://doi.pangaea.de/10.1594/PANGAEA.711835	32.3	-64.7	-25	Northeast Breakers, Bermuda	1856	1920	d18O	permil	carbonate	coral	aragonite	surface seawater	The availability of instrumental climate data allow the comparison with the coral signal and supports the interpretation of reconstructed past temperature anomalies. The use of air temperatures is justified by the strong long-term correspondence between Bermuda SST (COADS) of a 2 latitude by 2 longitude area and Bermuda air temperature during a 40-year period.	negative	T_water	annual	TRUE	http://lipdverse.org/iso2k/1_0_0/CO00DRBE.html	DMT (1/14/19)
Ocean2kHR_019	CO00FERA	CO00FERA01A	Coral	10.1029/1999PA000477	Felis, T., Paetzold, J., Loya, Y., Fine, M., Nawar, A. H. and Wefer, G.: A coral oxygen isotope record from the northern Red Sea documenting NAO, ENSO, and North Pacific teleconnections on Middle East climate variability since the year 1750, Paleoceanography, 15(6), 679–694, doi:10.1029/1999pa000477, 2000.	10.1002/2014PA002717	Tierney, J. E., Abram, N. J., Anchukaitis, K. J., Evans, M. N., Giry, C., Kilbourne, K. H., Saenger, C. P., Wu, H. C. and Zinke, J.: Tropical sea surface temperatures for the past four centuries reconstructed from coral archives, Paleoceanography, 30(3), 226–252, doi:10.1002/2014pa002717, 2015.	https://www.ncdc.noaa.gov/paleo/study/1861	27.85	34.32	-6	Ras Umm Sidd, Red Sea	1751.08	1995.58	d18O	permil	carbonate	coral	aragonite	surface seawater		negative	T_water	subannual	TRUE	http://lipdverse.org/iso2k/1_0_0/CO00FERA.html	DMT (1/14/19)
CO00KUNI01Ab	CO00KUNI	CO00KUNI01A	Coral	10.1007/s005310050300	Kuhnert, H., Paetzold, J., Wyrwoll, K.-H. and Wefer, G.: Monitoring climate variability over the past 116 years in coral oxygen isotopes from Ningaloo Reef, Western Australia, International Journal of Earth Sciences, 88(4), 725–732, doi:10.1007/s005310050300, 2000.			https://www.ncdc.noaa.gov/paleo/study/1867	-21.905	113.965	-3	Ningaloo Reef, West Australia	1879.08	1994.92	d18O	permil	carbonate	coral	aragonite	surface seawater		negative	T_water	subannual	TRUE	http://lipdverse.org/iso2k/1_0_0/CO00KUNI.html	DMT (1/14/19)
Ocean2kHR_177	CO00URMA	CO00URMA01	Coral	10.1038/35039597	Urban, F. E., Cole, J. E. and Overpeck, J. T.: Influence of mean climate change on climate variability from a 155-year tropical Pacific coral record, Nature, 407(6807), 989–993, doi:10.1038/35039597, 2000.	10.1002/2014PA002717	Tierney, J. E., Abram, N. J., Anchukaitis, K. J., Evans, M. N., Giry, C., Kilbourne, K. H., Saenger, C. P., Wu, H. C. and Zinke, J.: Tropical sea surface temperatures for the past four centuries reconstructed from coral archives, Paleoceanography, 30(3), 226–252, doi:10.1002/2014pa002717, 2015.	https://www.ncdc.noaa.gov/paleo/study/1859	0.933	173	6	Maiana Atoll, Republic of Kiribati	1840	1994.5	d18O	permil	carbonate	coral	aragonite	surface seawater		negative	T_water	subannual	TRUE	http://lipdverse.org/iso2k/1_0_0/CO00URMA.html	DMT (1/14/19)
Ocean2kHR_140	CO01TUNG	CO01TUNG01A	Coral	10.1126/science.1057969	Tudhope, A. W.: Variability in the El Nino-Southern Oscillation Through a Glacial-Interglacial Cycle, Science, 291(5508), 1511–1517, doi:10.1126/science.1057969, 2001.	10.1002/2014PA002717	Tierney, J. E., Abram, N. J., Anchukaitis, K. J., Evans, M. N., Giry, C., Kilbourne, K. H., Saenger, C. P., Wu, H. C. and Zinke, J.: Tropical sea surface temperatures for the past four centuries reconstructed from coral archives, Paleoceanography, 30(3), 226–252, doi:10.1002/2014pa002717, 2015.	https://www.ncdc.noaa.gov/paleo/study/1866	-5.217	145.817	-3	Deplik Tabat Reef, Madang Lagoon	1880.79	1993.04	d18O	permil	carbonate	coral	aragonite	surface seawater	This tracer responds to water temperature through a temperature- dependent fractionation [~ -0.2 permil d18O/degree C (19, 20)], as well as to changes in rainfall, due to the influence of isotopically light (more negative d18O) rainfall on surface ocean composition. Because SST and rainfall are intimately linked in tropical areas of strong convective rainfall such as the western equatorial Pacifi…	negative	T_water	subannual	TRUE	http://lipdverse.org/iso2k/1_0_0/CO01TUNG.html	DMT (1/14/19; updated 12/31/19), KLD
Ocean2kHR_141	CO01TUNG	CO01TUNG02A	Coral	10.1126/science.1057969	Tudhope, A. W.: Variability in the El Nino-Southern Oscillation Through a Glacial-Interglacial Cycle, Science, 291(5508), 1511–1517, doi:10.1126/science.1057969, 2001.	10.1002/2014PA002717	Tierney, J. E., Abram, N. J., Anchukaitis, K. J., Evans, M. N., Giry, C., Kilbourne, K. H., Saenger, C. P., Wu, H. C. and Zinke, J.: Tropical sea surface temperatures for the past four centuries reconstructed from coral archives, Paleoceanography, 30(3), 226–252, doi:10.1002/2014pa002717, 2015.	https://www.ncdc.noaa.gov/paleo/study/1866	-5.217	145.817	-3	Deplik Tabat Reef, Madang Lagoon	1884.54	1993.04	d18O	permil	carbonate	coral	aragonite	surface seawater	This tracer responds to water temperature through a temperature- dependent fractionation [~ -0.2 permil d18O/degree C (19, 20)], as well as to changes in rainfall, due to the influence of isotopically light (more negative d18O) rainfall on surface ocean composition. Because SST and rainfall are intimately linked in tropical areas of strong convective rainfall such as the western equatorial Pacifi…	negative	T_water	subannual	TRUE	http://lipdverse.org/iso2k/1_0_0/CO01TUNG.html	DMT (1/14/19; updated 12/31/19), KLD
Ocean2kHR_102	CO02KUBE	CO02KUBE01A	Coral	10.1016/S0031-0182(01)00410-2	Kuhnert, H., Paetzold, J., Schnetger, B. and Wefer, G.: Sea-surface temperature variability in the 16th century at Bermuda inferred from coral records, Palaeogeography, Palaeoclimatology, Palaeoecology, 179(3-4), 159–171, doi:10.1016/s0031-0182(01)00410-2, 2002.			https://www.ncdc.noaa.gov/paleo/study/1872	32.47	-64.7	-11	North East Breakers, Bermuda	1519.21	1604.21	d18O	permil	carbonate	coral	aragonite	surface seawater	This coral was not directly calibrated since the top is not modern. They used other calibrations (Porites), and not from Diploria labyrinthiformis. Using more recent Goodkin calibration would be applicable to this coral. "we used calibrations from the Atlantic and Pacific Oceans. For estimating temperatures from coral skeletal d18O we used the gradient of the temperature to N18O equation of Leder…	negative	T_water	subannual	TRUE	http://lipdverse.org/iso2k/1_0_0/CO02KUBE.html	DMT (1/14/19)
Ocean2kHR_006	CO03CHBA	CO03CHBA01A	Coral	10.1016/S0025-3227(03)00217-2	Charles, C. D., Cobb, K., Moore, M. D. and Fairbanks, R. G.: Monsoon–tropical ocean interaction in a network of coral records spanning the 20th century, Marine Geology, 201(1-3), 207–222, doi:10.1016/s0025-3227(03)00217-2, 2003.	10.1002/2014PA002717	Tierney, J. E., Abram, N. J., Anchukaitis, K. J., Evans, M. N., Giry, C., Kilbourne, K. H., Saenger, C. P., Wu, H. C. and Zinke, J.: Tropical sea surface temperatures for the past four centuries reconstructed from coral archives, Paleoceanography, 30(3), 226–252, doi:10.1002/2014pa002717, 2015.	https://www.ncdc.noaa.gov/paleo/study/1903	-8.2573	115.576	-3	Lombok Strait, Bali, Indonesia	1782	1990	d18O	permil	carbonate	coral	aragonite	surface seawater	in the Indonesian coral records, coral d18O is more heavily infuenced by rainfall variability	positive	d18O_seawater	subannual	TRUE	http://lipdverse.org/iso2k/1_0_0/CO03CHBA.html	DMT (1/14/19)
Ocean2kHR_171	CO03CHBU	CO03CHBU01A	Coral	10.1016/S0025-3227(03)00217-2	Charles, C. D., Cobb, K., Moore, M. D. and Fairbanks, R. G.: Monsoon–tropical ocean interaction in a network of coral records spanning the 20th century, Marine Geology, 201(1-3), 207–222, doi:10.1016/s0025-3227(03)00217-2, 2003.	10.1002/2014PA002717	Tierney, J. E., Abram, N. J., Anchukaitis, K. J., Evans, M. N., Giry, C., Kilbourne, K. H., Saenger, C. P., Wu, H. C. and Zinke, J.: Tropical sea surface temperatures for the past four centuries reconstructed from coral archives, Paleoceanography, 30(3), 226–252, doi:10.1002/2014pa002717, 2015.	https://www.ncdc.noaa.gov/paleo/study/1903	-1.5	124.833	-3	Bunaken Island	1860	1990.58	d18O	permil	carbonate	coral	aragonite	surface seawater	The annual variability of the Bunaken coral d18O refects the seasonal cycle of both salinity and temperature in the surrounding seawater. The characteristics and correlations of the Bunaken Island coral d18O record strongly suggestthat it monitors the air-sea interaction associatedwith Southeast Asian summer monsoon.	positive	d18O_seawater	subannual	TRUE	http://lipdverse.org/iso2k/1_0_0/CO03CHBU.html	DMT (1/14/19)
Ocean2kHR_139	CO03COPM	CO03COPM00A	Coral	10.1038/nature01779, 10.1029/2001GL012918	Cobb, K. M., Charles, C. D., Cheng, H. and Edwards, R. L.: El Nino/Southern Oscillation and tropical Pacific climate during the last millennium, Nature, 424(6946), 271–276, doi:10.1038/nature01779, 2003.	10.1029/2001GL012918	Wieczorek, M. A. and Zuber, M. T.: The composition and origin of the lunar crust: Constraints from central peaks and crustal thickness modeling, Geophysical Research Letters, 28(21), 4023–4026, doi:10.1029/2001gl012918, 2001.	https://www.ncdc.noaa.gov/paleo/study/1875	5.87	-162.13	-7	Palmyra (composite)	928.13	1998.37	d18O	permil	carbonate	coral	aragonite	surface seawater	ENSO variability is the dominant source of d18O variability in the Palmyra fossil-coral d18O records	negative	T_water	subannual	TRUE	http://lipdverse.org/iso2k/1_0_0/CO03COPM.html	DMT (1/14/19), KLD
CO04BAFI00A	CO04BAFI	CO04BAFI00A	Coral	10.1029/2003PA000935	Bagnato, S., Linsley, B. K., Howe, S. S., Wellington, G. M. and Salinger, J.: Evaluating the use of the massive coralDiploastrea helioporafor paleoclimate reconstruction, Paleoceanography, 19(1), n/a–n/a, doi:10.1029/2003pa000935, 2004.			https://www.ncdc.noaa.gov/paleo/study/1881	-16.8167	179.233	-2	Savusavu Bay, Fiji	1940	2000	d18O	permil	carbonate	coral	aragonite	surface seawater		negative	T_water	annual	TRUE	http://lipdverse.org/iso2k/1_0_0/CO04BAFI.html	DMT (1/14/19)
Ocean2kHR_174	CO04KIVA	CO04KIVA01A	Coral	10.1029/2004PA001033	Kilbourne, K. H., Quinn, T. M., Taylor, F. W., Delcroix, T. and Gouriou, Y.: El Nino-Southern Oscillation-related salinity variations recorded in the skeletal geochemistry of aPoritescoral from Espiritu Santo, Vanuatu, Paleoceanography, 19(4), n/a–n/a, doi:10.1029/2004pa001033, 2004.	10.1002/2014PA002717	Tierney, J. E., Abram, N. J., Anchukaitis, K. J., Evans, M. N., Giry, C., Kilbourne, K. H., Saenger, C. P., Wu, H. C. and Zinke, J.: Tropical sea surface temperatures for the past four centuries reconstructed from coral archives, Paleoceanography, 30(3), 226–252, doi:10.1002/2014pa002717, 2015.	https://www.ncdc.noaa.gov/paleo/study/1925	-15.7	167.2	-1.5	Malo Channel, Espiritu Santo Island, Vanuatu	1928.54	1992.46	d18O	permil	carbonate	coral	aragonite	surface seawater		negative	T_water	subannual	TRUE	http://lipdverse.org/iso2k/1_0_0/CO04KIVA.html	DMT (1/14/19)
Ocean2kHR_157	CO04LIFI	CO04LIFI01A	Coral	10.1007/s00382-003-0364-y	Wellington, G. M., Schrag, D. P., Ren, L., Salinger, M. J., Tudhope, A. W. and Linsley, B. K.: Geochemical evidence from corals for changes in the amplitude and spatial pattern of South Pacific interdecadal climate variability over the last 300 years, Climate Dynamics, 22(1), 1–11, doi:10.1007/s00382-003-0364-y, 2004.	10.1002/2014PA002717	Tierney, J. E., Abram, N. J., Anchukaitis, K. J., Evans, M. N., Giry, C., Kilbourne, K. H., Saenger, C. P., Wu, H. C. and Zinke, J.: Tropical sea surface temperatures for the past four centuries reconstructed from coral archives, Paleoceanography, 30(3), 226–252, doi:10.1002/2014pa002717, 2015.	https://www.ncdc.noaa.gov/paleo/study/16216	-16.8167	179.233	-10	Savusavu Bay	1781.5	1996.5	d18O	permil	carbonate	coral	aragonite	surface seawater		negative	T_water	subannual	TRUE	http://lipdverse.org/iso2k/1_0_0/CO04LIFI.html	DMT (1/14/19)
CO04LIRA01A	CO04LIRA	CO04LIRA01A	Coral	10.1007/s00382-003-0364-y	Wellington, G. M., Schrag, D. P., Ren, L., Salinger, M. J., Tudhope, A. W. and Linsley, B. K.: Geochemical evidence from corals for changes in the amplitude and spatial pattern of South Pacific interdecadal climate variability over the last 300 years, Climate Dynamics, 22(1), 1–11, doi:10.1007/s00382-003-0364-y, 2004.	10.1029/2005GC001115	Linsley, B.K., A. Kaplan, Y. Gouriou, J. Salinger, P.B. deMenocal, G.M. Wellington, and S.S. Howe. 2006. Tracking the extent of the South Pacific Convergence Zone since the early 1600s. Geochemistry, Geophysics, Geosystems, 7, Q05003. doi: 10.1029/2005GC001115	https://www.ncdc.noaa.gov/paleo/study/6089	-21.2378	-159.828	-18.3	Rarotonga, Cook Islands, South Pacific	1726.78	1996.91	d18O	permil	carbonate	coral	aragonite	surface seawater		negative	T_water	subannual	TRUE	http://lipdverse.org/iso2k/1_0_0/CO04LIRA.html	DMT (1/14/19)
CO04MGNG01A	CO04MGNG	CO04MGNG01A	Coral	10.1029/2004GL019972	McGregor, H. V. and Gagan, M. K.: Western Pacific coral δ18O records of anomalous Holocene variability in the El Nino-Southern Oscillation, Geophysical Research Letters, 31(11), n/a–n/a, doi:10.1029/2004gl019972, 2004.			https://www.ncdc.noaa.gov/paleo/study/9813	-3.6206	143.682		Papua New Guinea	1910	1997	d18O	permil	carbonate	coral	aragonite	surface seawater	Interannual variability in the MS01 coral d18O for 1910-1997 is clearly dominated by changes in d18Ow because SSTs reconstructed from the coral d18O span 5C [Gagan et al., 1998], while the GOSTA SST range is only 1C (Figure 1). Comparison of local SSTs and rainfall with the coral d18O record shows that d18O increases when SST and rainfall decrease during El Nino events.	positive	d18O_seawater	annual	TRUE	http://lipdverse.org/iso2k/1_0_0/CO04MGNG.html	DMT (1/14/19)
CO04PFCH02A	CO04PFCH	CO04PFCH02A	Coral	10.1016/j.yqres.2004.02.009	Pfeiffer, M., Dullo, W.-C. and Eisenhauer, A.: Variability of the Intertropical Convergence Zone recorded in coral isotopic records from the central indian Ocean (Chagos Archipelago), Quaternary Research, 61(3), 245–255, doi:10.1016/j.yqres.2004.02.009, 2004.			https://www.ncdc.noaa.gov/paleo/study/1891	-5.43	71.77	-1.8	Peros Banhos Atoll	1961.12	1995.62	d18O	permil	carbonate	coral	aragonite	surface seawater	Core piM correlates more strongly with precipitation and OLR than COI-5 (Table 1). Note that years of high rainfall coincide with years of large negative coral y18O anomalies in the wet season (and high amplitudes of the annual cycle,	positive	d18O_seawater	subannual	TRUE	http://lipdverse.org/iso2k/1_0_0/CO04PFCH.html	DMT (1/14/19)
Ocean2kHR_013	CO04PFRE	CO04PFRE01A	Coral	10.1029/2003PA000964	Pfeiffer, M., Timm, O., Dullo, W.-C. and Podlech, S.: Oceanic forcing of interannual and multidecadal climate variability in the southwestern Indian Ocean: Evidence from a 160 year coral isotopic record (La Reunion, 55°E, 21°S), Paleoceanography, 19(4), n/a–n/a, doi:10.1029/2003pa000964, 2004.	10.1002/2014PA002717	Tierney, J. E., Abram, N. J., Anchukaitis, K. J., Evans, M. N., Giry, C., Kilbourne, K. H., Saenger, C. P., Wu, H. C. and Zinke, J.: Tropical sea surface temperatures for the past four centuries reconstructed from coral archives, Paleoceanography, 30(3), 226–252, doi:10.1002/2014pa002717, 2015.	https://www.ncdc.noaa.gov/paleo/study/1890	-21.0333	55.25	-12.3	La Reunion, Southwestern Indian Ocean	1832	1995.67	d18O	permil	carbonate	coral	aragonite	surface seawater		negative	T_water	subannual	TRUE	http://lipdverse.org/iso2k/1_0_0/CO04PFRE.html	DMT (1/14/19)
Ocean2kHR_020	CO04ZIMG	CO04ZIMG01A	Coral	10.1016/j.epsl.2004.09.028, 10.1038/srep04393	Zinke, J., Dullo, W.-C., Heiss, G. A. and Eisenhauer, A.: ENSO and Indian Ocean subtropical dipole variability is recorded in a coral record off southwest Madagascar for the period 1659 to 1995, Earth and Planetary Science Letters, 228(1-2), 177–194, doi:10.1016/j.epsl.2004.09.028, 2004.	10.1002/2014PA002717	Tierney, J. E., Abram, N. J., Anchukaitis, K. J., Evans, M. N., Giry, C., Kilbourne, K. H., Saenger, C. P., Wu, H. C. and Zinke, J.: Tropical sea surface temperatures for the past four centuries reconstructed from coral archives, Paleoceanography, 30(3), 226–252, doi:10.1002/2014pa002717, 2015.	https://www.ncdc.noaa.gov/paleo/study/16438	-23.15	43.58	-1.1	Ifaty Reef, SW Madagascar	1659.62	1995.62	d18O	permil	carbonate	coral	aragonite	surface seawater	A correlation of seasonal mean rainfall anomalies derived from the NCEP/NCAR reanalysis data set (1948-1995; averaged over 3545E, 20-30S; http://www. cdc.noaa.gov/cdc/data.ncep.reanalysis.derived.html) with coral d18O shows a clear relationship during austral summer (NDJF) significant above the 90% level (Fig. 6). This also holds for a correlation with South African summer rainfall averaged over …	negative	T_water	subannual	TRUE	http://lipdverse.org/iso2k/1_0_0/CO04ZIMG.html	DMT (1/14/19)
Ocean2kHR_166	CO05ASGU	CO05ASGU01A	Coral	10.1029/2004JC002555	Asami, R.: Interannual and decadal variability of the western Pacific sea surface condition for the years 1787–2000: Reconstruction based on stable isotope record from a Guam coral, Journal of Geophysical Research, 110(C5), doi:10.1029/2004jc002555, 2005.	10.1002/2014PA002717	Tierney, J. E., Abram, N. J., Anchukaitis, K. J., Evans, M. N., Giry, C., Kilbourne, K. H., Saenger, C. P., Wu, H. C. and Zinke, J.: Tropical sea surface temperatures for the past four centuries reconstructed from coral archives, Paleoceanography, 30(3), 226–252, doi:10.1002/2014pa002717, 2015.	https://www.ncdc.noaa.gov/paleo/study/1915	13.598	144.836	-7.8	Guam Coral	1790.04	2000.21	d18O	permil	carbonate	coral	aragonite	surface seawater	The d18Ocoral anomaly is significantly correlated with SST anomaly (SSTA) (r = -0.69 and p < 0.01) and SSS anomaly (SSSA) (r = 0.49 and p < 0.01). These results suggest that changes in Guam d18Ocoral are mainly influenced by SST and SSS variations on seasonal and interannual timescales.	negative	T_water	subannual	TRUE	http://lipdverse.org/iso2k/1_0_0/CO05ASGU.html	DMT (1/14/19)
Ocean2kHR_142	CO05BAFI	CO05BAFI00A	Coral	10.1029/2004GC000879	Bagnato, S., Linsley, B. K., Howe, S. S., Wellington, G. M. and Salinger, J.: Coral oxygen isotope records of interdecadal climate variations in the South Pacific Convergence Zone region, Geochemistry, Geophysics, Geosystems, 6(6), doi:10.1029/2004gc000879, 2005.	10.1002/2014PA002717	Tierney, J. E., Abram, N. J., Anchukaitis, K. J., Evans, M. N., Giry, C., Kilbourne, K. H., Saenger, C. P., Wu, H. C. and Zinke, J.: Tropical sea surface temperatures for the past four centuries reconstructed from coral archives, Paleoceanography, 30(3), 226–252, doi:10.1002/2014pa002717, 2015.	https://www.ncdc.noaa.gov/paleo/study/1916	-16.8167	179.233	-2	Savusavu Bay, Fiji	1776	2001	d18O	permil	carbonate	coral	aragonite	surface seawater		negative	T_water	annual	TRUE	http://lipdverse.org/iso2k/1_0_0/CO05BAFI.html	DMT (1/14/19), KLD
Ocean2kHR_105	CO05KUBE	CO05KUBE01A	Coral	10.1029/2004GC000786	Kuhnert, H., Crueger, T. and Paetzold, J.: NAO signature in a Bermuda coral Sr/Ca record, Geochemistry, Geophysics, Geosystems, 6(4), n/a–n/a, doi:10.1029/2004gc000786, 2005.	10.1002/2014PA002717	Tierney, J. E., Abram, N. J., Anchukaitis, K. J., Evans, M. N., Giry, C., Kilbourne, K. H., Saenger, C. P., Wu, H. C. and Zinke, J.: Tropical sea surface temperatures for the past four centuries reconstructed from coral archives, Paleoceanography, 30(3), 226–252, doi:10.1002/2014pa002717, 2015.	http://doi.pangaea.de/10.1594/PANGAEA.738188	32.467	-64.7	-12	North East Breakers, Bermuda	1825.21	1983.21	d18O	permil	carbonate	coral	aragonite	surface seawater		negative	T_water	subannual	TRUE	http://lipdverse.org/iso2k/1_0_0/CO05KUBE.html	DMT (1/14/19)
Ocean2kHR_007	CO06DATZ	CO06DATZ01A	Coral	10.1029/2005PA001217	Damassa, T. D., Cole, J. E., Barnett, H. R., Ault, T. R. and McClanahan, T. R.: Enhanced multidecadal climate variability in the seventeenth century from coral isotope records in the western Indian Ocean, Paleoceanography, 21(2), n/a–n/a, doi:10.1029/2005pa001217, 2006.	10.1002/2014PA002717	Tierney, J. E., Abram, N. J., Anchukaitis, K. J., Evans, M. N., Giry, C., Kilbourne, K. H., Saenger, C. P., Wu, H. C. and Zinke, J.: Tropical sea surface temperatures for the past four centuries reconstructed from coral archives, Paleoceanography, 30(3), 226–252, doi:10.1002/2014pa002717, 2015.	https://www.ncdc.noaa.gov/paleo/study/10808	-8.0167	39.5	-6	Mafia Archipelago, Tanzania	1622	1998.12	d18O	permil	carbonate	coral	aragonite	surface seawater	The coral captures approximately 60% of the full range of annual SST (4i¿½C = 0.88%).	negative	T_water	subannual	TRUE	http://lipdverse.org/iso2k/1_0_0/CO06DATZ.html	DMT (1/14/19)
Ocean2kHR_156	CO06LIFI	CO06LIFI01A	Coral	10.1029/2005GC001115	Linsley, B. K., Kaplan, A., Gouriou, Y., Salinger, J., deMenocal, P. B., Wellington, G. M. and Howe, S. S.: Tracking the extent of the South Pacific Convergence Zone since the early 1600s, Geochemistry, Geophysics, Geosystems, 7(5), n/a–n/a, doi:10.1029/2005gc001115, 2006.	10.1002/2014PA002717	Tierney, J. E., Abram, N. J., Anchukaitis, K. J., Evans, M. N., Giry, C., Kilbourne, K. H., Saenger, C. P., Wu, H. C. and Zinke, J.: Tropical sea surface temperatures for the past four centuries reconstructed from coral archives, Paleoceanography, 30(3), 226–252, doi:10.1002/2014pa002717, 2015.	https://www.ncdc.noaa.gov/paleo/study/16216	-16.8167	179.233	-10	Savusavu Bay, Fiji	1617.5	2001.5	d18O	permil	carbonate	coral	aragonite	surface seawater		negative	T_water	annual	TRUE	http://lipdverse.org/iso2k/1_0_0/CO06LIFI.html	DMT (1/14/19)
Ocean2kHR_107	CO06MOPE	CO06MOPE01A	Coral	10.1029/2005PA001257	Moses, C. S., Swart, P. K. and Rosenheim, B. E.: Evidence of multidecadal salinity variability in the eastern tropical North Atlantic, Paleoceanography, 21(3), doi:10.1029/2005pa001257, 2006.			https://www.ncdc.noaa.gov/paleo/study/6184	16.75	-22.8883	-5	Pedra de Lume, Cape Verde Islands	1928.96	2002.21	d18O	permil	carbonate	coral	aragonite	surface seawater	SSS variability at interanual time scale	positive	d18O_seawater	subannual	TRUE	http://lipdverse.org/iso2k/1_0_0/CO06MOPE.html	DMT (1/14/19)
Ocean2kHR_110	CO06MOTO	CO06MOTO02A	Coral	{moses2006stable}				https://www.ncdc.noaa.gov/paleo/study/1924	11.17	-60.85	-2	Buccoo Reef, Tobago	1932	1990	d18O	permil	carbonate	coral	aragonite	surface seawater	The average interannual d18O variability at Tobago represents a SST of ~1.0C from one year to the next, about 3.5 times the instrumental deltaSST value. This disagreement implies that there are significant interannual changes in salinity responsible for the d18O of the corals from Tobago.	positive	d18O_seawater	subannual	TRUE	http://lipdverse.org/iso2k/1_0_0/CO06MOTO.html	DMT (1/14/19)
Ocean2kHR_144	CO06QUNG	CO06QUNG01A	Coral	10.1029/2005JC003243	Quinn, T. M., Taylor, F. W. and Crowley, T. J.: Coral-based climate variability in the Western Pacific Warm Pool since 1867, Journal of Geophysical Research, 111(C11), doi:10.1029/2005jc003243, 2006.	10.1002/2014PA002717	Tierney, J. E., Abram, N. J., Anchukaitis, K. J., Evans, M. N., Giry, C., Kilbourne, K. H., Saenger, C. P., Wu, H. C. and Zinke, J.: Tropical sea surface temperatures for the past four centuries reconstructed from coral archives, Paleoceanography, 30(3), 226–252, doi:10.1002/2014pa002717, 2015.	https://www.ncdc.noaa.gov/paleo/study/6116	-4.1916	151.977	-8	Rabaul	1867.38	1997.54	d18O	permil	carbonate	coral	aragonite	surface seawater	Coral d18O variations are modestly correlated with SST variations over their common period of overlap (1970? 1993), both in terms of the monthly and monthly anomaly time series	negative	T_water	subannual	TRUE	http://lipdverse.org/iso2k/1_0_0/CO06QUNG.html	DMT (1/14/19)
Ocean2kHR_193	CO07CAFR	CO07CAFR01A	Coral	10.1016/j.palaeo.2006.12.003	Calvo, E., Marshall, J. F., Pelejero, C., McCulloch, M. T., Gagan, M. K. and Lough, J. M.: Interdecadal climate variability in the Coral Sea since 1708 A.D., Palaeogeography, Palaeoclimatology, Palaeoecology, 248(1-2), 190–201, doi:10.1016/j.palaeo.2006.12.003, 2007.			https://www.ncdc.noaa.gov/paleo/study/6087	-17.73	148.43	-5	Coral Sea	1708	1988	d18O	permil	carbonate	coral	aragonite	surface seawater	both temperature and seawater isotopic composition effect d18O in the Flinders coral record. Δδ18O explains 65% of the variance displayed by the δ18O signature	positive	d18O_seawater	annual	TRUE	http://lipdverse.org/iso2k/1_0_0/CO07CAFR.html	DMT (1/14/19)
Ocean2kHR_010	CO08ABSU	CO08ABSU01A	Coral	10.1038/ngeo357	Abram, N. J., Gagan, M. K., Cole, J. E., Hantoro, W. S. and Mudelsee, M.: Recent intensification of tropical climate variability in the Indian Ocean, Nature Geoscience, 1(12), 849–853, doi:10.1038/ngeo357, 2008.	10.1002/2014PA002717	Tierney, J. E., Abram, N. J., Anchukaitis, K. J., Evans, M. N., Giry, C., Kilbourne, K. H., Saenger, C. P., Wu, H. C. and Zinke, J.: Tropical sea surface temperatures for the past four centuries reconstructed from coral archives, Paleoceanography, 30(3), 226–252, doi:10.1002/2014pa002717, 2015.	https://www.ncdc.noaa.gov/paleo/study/8607	-0.13	98.52	-6	Mantawai Islands, West Sumatra, Indonesia	1858.29	1997.96	d18O	permil	carbonate	coral	aragonite	surface seawater	IOD upwelling cools the ambient SST and decreases rainfall, both of which increase coral d18O.	negative	T_water	subannual	TRUE	http://lipdverse.org/iso2k/1_0_0/CO08ABSU.html	DMT (1/14/19)
Ocean2kHR_094	CO08GOBE	CO08GOBE01A	Coral	10.1038/ngeo352	Goodkin, N. F., Hughen, K. A., Doney, S. C. and Curry, W. B.: Increased multidecadal variability of the North Atlantic Oscillation since 1781, Nature Geoscience, 1(12), 844–848, doi:10.1038/ngeo352, 2008.	10.1002/2014PA002717	Tierney, J. E., Abram, N. J., Anchukaitis, K. J., Evans, M. N., Giry, C., Kilbourne, K. H., Saenger, C. P., Wu, H. C. and Zinke, J.: Tropical sea surface temperatures for the past four centuries reconstructed from coral archives, Paleoceanography, 30(3), 226–252, doi:10.1002/2014pa002717, 2015.	https://www.ncdc.noaa.gov/paleo/study/6115	30.6486	-64.9888	-16	Bermuda south shore	1782	1998	d18O	permil	carbonate	coral	aragonite	surface seawater	we show that with the present coral record and relatively short calibration data set, we are unable to derive a robust, statistically significant separation of the salinity and temperature signals within the coral d18O.	negative	T_water	subannual	TRUE	http://lipdverse.org/iso2k/1_0_0/CO08GOBE.html	DMT (1/14/19)
Ocean2kHR_096	CO08HEVE	CO08HEVE01A	Coral	10.1130/G24321A.1	Hetzinger, S., Pfeiffer, M., Dullo, W.-C., Keenlyside, N., Latif, M. and Zinke, J.: Caribbean coral tracks Atlantic Multidecadal Oscillation and past hurricane activity, Geology, 36(1), 11, doi:10.1130/g24321a.1, 2008.			https://www.ncdc.noaa.gov/paleo/study/12891	11.77	-66.75	-2	Cayo Sal, Los Roques Archipelago, Venezuela	1917.79	2004.79	d18O	permil	carbonate	coral	aragonite	surface seawater	Hetzinger 2006 calibration and general d18O to SST slope for corals used (-0.2)	negative	T_water	subannual	TRUE	http://lipdverse.org/iso2k/1_0_0/CO08HEVE.html	DMT (1/14/19)
CO08KIPR01A	CO08KIPR	CO08KIPR01A	Coral	10.1029/2008PA001598, 10.1029/2010gc003171, 10.1007/s00382-007-0224-2	Kilbourne, K. H., Quinn, T. M., Webb, R., Guilderson, T., Nyberg, J. and Winter, A.: Paleoclimate proxy perspective on Caribbean climate since the year 1751: Evidence of cooler temperatures and multidecadal variability, Paleoceanography, 23(3), n/a–n/a, doi:10.1029/2008pa001598, 2008.	10.1029/2010gc003171	Kilbourne, K. H., Quinn, T. M., Webb, R., Guilderson, T., Nyberg, J. and Winter, A.: Coral windows onto seasonal climate variability in the northern Caribbean since 1479, Geochemistry, Geophysics, Geosystems, 11(10), n/a–n/a, doi:10.1029/2010gc003171, 2010.	https://www.ncdc.noaa.gov/paleo/study/6117	17.933	-67.001	-4	Turrumote Reef, La Parguera, Puerto Rico	1751	2004	d18O	permil	carbonate	coral	aragonite	surface seawater	They use calibration from other studies with this coral species, Montastraea faveolata or annularis (the same coral), 0.22 per mil per degree C [Leder et al., 1996]. In Kilbourne 2010, "centenniala€scale variability appears to be driven by temperature".	negative	T_water	annual	TRUE	http://lipdverse.org/iso2k/1_0_0/CO08KIPR.html	DMT (1/14/19)
Ocean2kHR_012	CO09NAKY	CO09NAKY02A	Coral	10.1029/2009GL040590	Nakamura, N., Kayanne, H., Iijima, H., McClanahan, T. R., Behera, S. K. and Yamagata, T.: Mode shift in the Indian Ocean climate under global warming stress, Geophysical Research Letters, 36(23), doi:10.1029/2009gl040590, 2009.	10.1002/2014PA002717	Tierney, J. E., Abram, N. J., Anchukaitis, K. J., Evans, M. N., Giry, C., Kilbourne, K. H., Saenger, C. P., Wu, H. C. and Zinke, J.: Tropical sea surface temperatures for the past four centuries reconstructed from coral archives, Paleoceanography, 30(3), 226–252, doi:10.1002/2014pa002717, 2015.	https://www.ncdc.noaa.gov/paleo/study/12994	-3.2	40.1	-4.4	Malindi	1886.96	2002.71	d18O	permil	carbonate	coral	aragonite	surface seawater		negative	T_water	subannual	TRUE	http://lipdverse.org/iso2k/1_0_0/CO09NAKY.html	DMT (1/14/19)
CO09NUTB01B	CO09NUTB	CO09NUTB01B	Coral	10.1029/2009GL040270	Nurhati, I. S., Cobb, K. M., Charles, C. D. and Dunbar, R. B.: Late 20th century warming and freshening in the central tropical Pacific, Geophysical Research Letters, 36(21), doi:10.1029/2009gl040270, 2009.			https://www.ncdc.noaa.gov/paleo/study/8609	3.9062	-159.286	-11	Fanning Island	1972.13	2005.54	d18O	permil	inferred seawater		d18Oseawater calculated from d18O and Sr/Ca	surface seawater		positive	d18O_seawater	subannual	TRUE	http://lipdverse.org/iso2k/1_0_0/CO09NUTB.html	DMT (1/14/19; updated 12/31/19)
Ocean2kHR_097	CO10HEIG	CO10HEIG01A	Coral	10.1016/j.palaeo.2010.06.019	Hetzinger, S., Pfeiffer, M., Dullo, W.-C., Garbe-Schoenberg, D. and Halfar, J.: Rapid 20th century warming in the Caribbean and impact of remote forcing on climate in the northern tropical Atlantic as recorded in a Guadeloupe coral, Palaeogeography, Palaeoclimatology, Palaeoecology, 296(1-2), 111–124, doi:10.1016/j.palaeo.2010.06.019, 2010.	10.1002/2014PA002717	Tierney, J. E., Abram, N. J., Anchukaitis, K. J., Evans, M. N., Giry, C., Kilbourne, K. H., Saenger, C. P., Wu, H. C. and Zinke, J.: Tropical sea surface temperatures for the past four centuries reconstructed from coral archives, Paleoceanography, 30(3), 226–252, doi:10.1002/2014pa002717, 2015.	https://www.ncdc.noaa.gov/paleo/study/12893	16.2	-61.49	-1.7	Guadeloupe	1895.7	1999.21	d18O	permil	carbonate	coral	aragonite	surface seawater	Correlation and regression assesed with SODA SST, ERSST V2.0, and local air temperature for 1958-1999 for monthly values, extreme values only (max-min mehtod), and annual mean. ERSST extreme values had the correlation, this could be due to subannual dating uncertaincies and linear interpolation to monthly values. Calibration detailed in Hetzinger 2006, 10.1029/2006GC001347	negative	T_water	subannual	TRUE	http://lipdverse.org/iso2k/1_0_0/CO10HEIG.html	DMT (1/14/19)
Ocean2kHR_160	CO11NUPM	CO11NUPM01	Coral	10.1175/2011JCLI3852.1	Nurhati, I. S., Cobb, K. M. and Di Lorenzo, E.: Decadal-Scale SST and Salinity Variations in the Central Tropical Pacific: Signatures of Natural and Anthropogenic Climate Change, Journal of Climate, 24(13), 3294–3308, doi:10.1175/2011jcli3852.1, 2011.	10.1002/2014PA002717	Tierney, J. E., Abram, N. J., Anchukaitis, K. J., Evans, M. N., Giry, C., Kilbourne, K. H., Saenger, C. P., Wu, H. C. and Zinke, J.: Tropical sea surface temperatures for the past four centuries reconstructed from coral archives, Paleoceanography, 30(3), 226–252, doi:10.1002/2014pa002717, 2015.	https://www.ncdc.noaa.gov/paleo/study/10373	5.87	-162.13	-10	Palmyra	1886.13	1998.29	d18O	permil	carbonate	coral	aragonite	surface seawater		negative	T_water	subannual	TRUE	http://lipdverse.org/iso2k/1_0_0/CO11NUPM.html	DMT (1/14/19)
Ocean2kHR_154	CO12GOVA	CO12GOVA01A	Coral	10.1029/2012PA002302	Gorman, M. K., Quinn, T. M., Taylor, F. W., Partin, J. W., Cabioch, G., Austin, J. A., Pelletier, B., Ballu, V., Maes, C. and Saustrup, S.: A coral-based reconstruction of sea surface salinity at Sabine Bank, Vanuatu from 1842 to 2007 CE, Paleoceanography, 27(3), n/a–n/a, doi:10.1029/2012pa002302, 2012.	10.1002/2014PA002717	Tierney, J. E., Abram, N. J., Anchukaitis, K. J., Evans, M. N., Giry, C., Kilbourne, K. H., Saenger, C. P., Wu, H. C. and Zinke, J.: Tropical sea surface temperatures for the past four centuries reconstructed from coral archives, Paleoceanography, 30(3), 226–252, doi:10.1002/2014pa002717, 2015.	https://www.ncdc.noaa.gov/paleo/study/13439	-15.94	166.04	-8	Vanuatu	1842.62	2007.62	d18O	permil	carbonate	coral	aragonite	surface seawater	We develop and test a transfer function constructed using linear regression analysis of SBV coral d18Oanomaly variations and instrumental SSS over the period 1970?2007 CE [Thirumalai et al., 2011]. We performed a calibration-verification exercise (Figure 6) between d18Oanomaly and SSS at SBV to assess the robustness of the transfer function [Quinn and Sampson, 2002]. The slopes in equations (1)?(…	positive	d18O_seawater	subannual	TRUE	http://lipdverse.org/iso2k/1_0_0/CO12GOVA.html	DMT (1/14/19)
CO13CABL01A	CO13CABL	CO13CABL01A	Coral	10.1007/s00338-012-1004-y	Carilli, J. E., Charles, C. D., Garren, M., McField, M. and Norris, R. D.: Baseline shifts in coral skeletal oxygen isotopic composition: a signature of symbiont shuffling?, Coral Reefs, 32(2), 559–571, doi:10.1007/s00338-012-1004-y, 2013.			https://www.ncdc.noaa.gov/paleo/study/17378	16.1292	-88.2497	-11.8	Belize	1940.37	2006.01	d18O	permil	carbonate	coral	aragonite	surface seawater		negative	T_water	subannual	TRUE	http://lipdverse.org/iso2k/1_0_0/CO13CABL.html	DMT (1/14/19)
CO13CAHN01A	CO13CAHN	CO13CAHN01A	Coral	10.1007/s00338-012-1004-y	Carilli, J. E., Charles, C. D., Garren, M., McField, M. and Norris, R. D.: Baseline shifts in coral skeletal oxygen isotopic composition: a signature of symbiont shuffling?, Coral Reefs, 32(2), 559–571, doi:10.1007/s00338-012-1004-y, 2013.			https://www.ncdc.noaa.gov/paleo/study/17378	16.0644	-86.9508	-6	Diamond Caye, Utila, Honduras	1940	2006.5	d18O	permil	carbonate	coral	aragonite	surface seawater		negative	T_water	subannual	TRUE	http://lipdverse.org/iso2k/1_0_0/CO13CAHN.html	DMT (1/14/19; updated 12/31/19)
CO13CAHN02A	CO13CAHN	CO13CAHN02A	Coral	10.1007/s00338-012-1004-y	Carilli, J. E., Charles, C. D., Garren, M., McField, M. and Norris, R. D.: Baseline shifts in coral skeletal oxygen isotopic composition: a signature of symbiont shuffling?, Coral Reefs, 32(2), 559–571, doi:10.1007/s00338-012-1004-y, 2013.			https://www.ncdc.noaa.gov/paleo/study/17378	16.0644	-86.9508	-6	Diamond Caye, Utila, Honduras	1922.09	2006.47	d18O	permil	carbonate	coral	aragonite	surface seawater		negative	T_water	subannual	TRUE	http://lipdverse.org/iso2k/1_0_0/CO13CAHN.html	DMT (1/14/19; updated 12/31/19)
CO13COTB00A	CO13COTB	CO13COTB00A	Coral	10.1038/nature01779	Cobb, K. M., Charles, C. D., Cheng, H. and Edwards, R. L.: El Nino/Southern Oscillation and tropical Pacific climate during the last millennium, Nature, 424(6946), 271–276, doi:10.1038/nature01779, 2003.			https://www.ncdc.noaa.gov/paleo/study/1875	3.9062	-159.286		Fanning Island (composite)	1949.54	1978.79	d18O	permil	carbonate	coral	aragonite	surface seawater	interannual d18O variability has a correlation of -0.85 with SST	negative	T_water	subannual	TRUE	http://lipdverse.org/iso2k/1_0_0/CO13COTB.html	DMT (1/14/19)
CO13COXM03A	CO13COXM	CO13COXM03A	Coral	10.1126/science.1228246	Cobb, K. M., Westphal, N., Sayani, H. R., Watson, J. T., Di Lorenzo, E., Cheng, H., Edwards, R. L. and Charles, C. D.: Highly Variable El Nino–Southern Oscillation Throughout the Holocene, Science, 339(6115), 67–70, doi:10.1126/science.1228246, 2013.			https://www.ncdc.noaa.gov/paleo/study/13672	1.52	-157.24		Kiritimati Island, Line Islands, Kiribati	388.62	434.29	d18O	permil	carbonate	coral	aragonite	surface seawater	Modern Line Islands coral d18O records are high- ly correlated to the regional-scale NIi¿½O3.4 index (defined as the average of instrumental SSTs from 5i¿½S to 5i¿½N, and from 120i¿½ to 170i¿½W)	negative	T_water	subannual	TRUE	http://lipdverse.org/iso2k/1_0_0/CO13COXM.html	DMT (1/14/19)
WEB396032ca	CO13DESC01A	CO13DESC01A	Coral	10.1002/jgrc.20180	Deng, W., Wei, G., Xie, L., Ke, T., Wang, Z., Zeng, T. and Liu, Y.: Variations in the Pacific Decadal Oscillation since 1853 in a coral record from the northern South China Sea, Journal of Geophysical Research: Oceans, 118(5), 2358–2366, doi:10.1002/jgrc.20180, 2013.	10.1016/j.jseaes.2016.12.012	Xiao, H., Deng, W., Chen, X., Wei, G., Zeng, T. and Zhao, J.: Wet and cold climate conditions recorded by coral geochemical proxies during the beginning of the first millennium CE in the northern South China Sea, Journal of Asian Earth Sciences, 135, 25–34, doi:10.1016/j.jseaes.2016.12.012, 2017.	https://agupubs.onlinelibrary.wiley.com/action/downloadSupplement?doi=10.1002%2F2016JC012458&file=jgrc22050-sup-0002-2016JC012458-ds01.xlsx	19.287	110.656	-4	Hainan Island	1853	2011	d18O	permil	carbonate	coral	aragonite	surface seawater	The geochemicalsignature of the corals appears to be influenced by the interdecadal variability of terrestrial runoff associated withrainfall; moreover, these low-frequency variations arelikely initiated by PDO activity. Values of coral_x000E_(delta)d18O (d18Osw) and_x0002_d18O are mainly controlled by terrestrial runoff.	positive	d18O_seawater	annual	TRUE	http://lipdverse.org/iso2k/1_0_0/CO13DESC01A.html	DMT (1/14/19)
CO13HENG01A	CO13HENG	CO13HENG01A	Coral	10.1130/G33510.1	Hereid, K. A., Quinn, T. M., Taylor, F. W., Shen, C.-C., Lawrence Edwards, R. and Cheng, H.: Coral record of reduced El Nino activity in the early 15th to middle 17th centuries, Geology, 41(1), 51–54, doi:10.1130/g33510.1, 2012.			https://www.ncdc.noaa.gov/paleo/study/15794	-10.6907	152.811	0	Misima Island, Papua New Guinea	1916.92	1945.01	d18O	permil	carbonate	coral	aragonite	surface seawater		positive	d18O_seawater	subannual	TRUE	http://lipdverse.org/iso2k/1_0_0/CO13HENG.html	DMT (1/14/19)
CO13HENG02A	CO13HENG	CO13HENG02A	Coral	10.1130/G33510.1	Hereid, K. A., Quinn, T. M., Taylor, F. W., Shen, C.-C., Lawrence Edwards, R. and Cheng, H.: Coral record of reduced El Nino activity in the early 15th to middle 17th centuries, Geology, 41(1), 51–54, doi:10.1130/g33510.1, 2012.			https://www.ncdc.noaa.gov/paleo/study/15794	-10.6907	152.811	0	Misima Island, Papua New Guinea	1411.62	1578.42	d18O	permil	carbonate	coral	aragonite	surface seawater		positive	d18O_seawater	subannual	TRUE	http://lipdverse.org/iso2k/1_0_0/CO13HENG.html	DMT (1/14/19)
CO13HENG03A	CO13HENG	CO13HENG03A	Coral	10.1130/G33510.1	Hereid, K. A., Quinn, T. M., Taylor, F. W., Shen, C.-C., Lawrence Edwards, R. and Cheng, H.: Coral record of reduced El Nino activity in the early 15th to middle 17th centuries, Geology, 41(1), 51–54, doi:10.1130/g33510.1, 2012.			https://www.ncdc.noaa.gov/paleo/study/15794	-10.6907	152.811	0	Misima Island, Papua New Guinea	1555.38	1644.75	d18O	permil	carbonate	coral	aragonite	surface seawater		positive	d18O_seawater	subannual	TRUE	http://lipdverse.org/iso2k/1_0_0/CO13HENG.html	DMT (1/14/19)
CO14CABT01A	CO14CABT	CO14CABT01A	Coral	10.1002/2014PA002683	Carilli, J. E., McGregor, H. V., Gaudry, J. J., Donner, S. D., Gagan, M. K., Stevenson, S., Wong, H. and Fink, D.: Equatorial Pacific coral geochemical records show recent weakening of the Walker Circulation, Paleoceanography, 29(11), 1031–1045, doi:10.1002/2014pa002683, 2014.			https://www.ncdc.noaa.gov/paleo/study/17289	3.0731	172.747	-5	Butaritari Atoll, Gilbert Islands	1959.37	2010.37	d18O	permil	carbonate	coral	aragonite	surface seawater	The full Butaritari coral Sr/Ca and d18O (Figures 3b and 3c) are well correlated with SST from the 2° x 2° grid cell centered on 4°N, 172°E in ERSSTv3b (R = 0.58 for Sr/Ca and 0.39 for d18O, p < 0.05 on detrended bimonthly data).	negative	T_water	subannual	TRUE	http://lipdverse.org/iso2k/1_0_0/CO14CABT.html	DMT (12/30/19)
CO14CATI01A	CO14CATI	CO14CATI01A	Coral	10.1002/2013JC009594	Cahyarini, S. Y., Pfeiffer, M., Nurhati, I. S., Aldrian, E., Dullo, W.-C. and Hetzinger, S.: Twentieth century sea surface temperature and salinity variations at Timor inferred from paired coral δ18O and Sr/Ca measurements, Journal of Geophysical Research: Oceans, 119(7), 4593–4604, doi:10.1002/2013jc009594, 2014.			https://www.ncdc.noaa.gov/paleo/study/19179	-10.2	123.517	-3	Ombai Strait, Timor Island	1914.46	2004.46	d18O	permil	carbonate	coral	aragonite	surface seawater	Annual values are most enriched (September) or depleted (March) in between annual SST and SSS maxima and minima, suggesting both contribute to Timor coral d18O	negative	T_water	subannual	TRUE	http://lipdverse.org/iso2k/1_0_0/CO14CATI.html	DMT (12/30/19)
Ocean2kHR_181	CO14OSPA	CO14OSPA01A	Coral	10.1007/s00338-014-1146-1	Osborne, M. C., Dunbar, R. B., Mucciarone, D. A., Druffel, E. and Sanchez-Cabeza, J.-A.: A 215-yr coral δ18O time series from Palau records dynamics of the West Pacific Warm Pool following the end of the Little Ice Age, Coral Reefs, 33(3), 719–731, doi:10.1007/s00338-014-1146-1, 2014.			https://www.ncdc.noaa.gov/paleo/study/16339	7.2859	134.25	-12	Palau	1899.17	2008.17	d18O	permil	carbonate	coral	aragonite	surface seawater	Although empirically determined regression slopes are similar to published SST-d18OCRL fractionation values for P. lutea, in both instances, the percents of explained variance in the regressions are small. This suggests that factors such as SSS are contributing to Palau d18OCRL variability in the pre-instrumental period.	positive	d18O_seawater	subannual	TRUE	http://lipdverse.org/iso2k/1_0_0/CO14OSPA.html	DMT (1/14/19)
Ocean2kHR_183	CO14OSPA	CO14OSPA02A	Coral	10.1007/s00338-014-1146-1	Osborne, M. C., Dunbar, R. B., Mucciarone, D. A., Druffel, E. and Sanchez-Cabeza, J.-A.: A 215-yr coral δ18O time series from Palau records dynamics of the West Pacific Warm Pool following the end of the Little Ice Age, Coral Reefs, 33(3), 719–731, doi:10.1007/s00338-014-1146-1, 2014.			https://www.ncdc.noaa.gov/paleo/study/16339	7.2859	134.25	-12	Palau	1793.17	2008.17	d18O	permil	carbonate	coral	aragonite	surface seawater	Although empirically determined regression slopes are similar to published SST-d18OCRL fractionation values for P. lutea, in both instances, the per cents of explained variance in the regressions are small. This suggests that factors such as SSS are contributing to Palau d18OCRL variability in the pre-instrumental period.	positive	d18O_seawater	subannual	TRUE	http://lipdverse.org/iso2k/1_0_0/CO14OSPA.html	DMT (1/14/19)
CO14WUCL01A	CO14WUCL	CO14WUCL01A	Coral	10.1016/j.palaeo.2014.07.039	Wu, H. C., Moreau, M., Linsley, B. K., Schrag, D. P. and Correge, T.: Investigation of sea surface temperature changes from replicated coral Sr/Ca variations in the eastern equatorial Pacific (Clipperton Atoll) since 1874, Palaeogeography, Palaeoclimatology, Palaeoecology, 412, 208–222, doi:10.1016/j.palaeo.2014.07.039, 2014.			https://www.ncdc.noaa.gov/paleo/study/17380	10.3	-109.22	-13.1	Clipperton Atoll	1874.08	1956.79	d18O	permil	carbonate	coral	aragonite	surface seawater		negative	T_water	subannual	TRUE	http://lipdverse.org/iso2k/1_0_0/CO14WUCL.html	DMT (1/14/19)
Ocean2kHR_026	CO14ZIHO	CO14ZIHO01A	Coral	10.1038/ncomms4607	Zinke, J., Rountrey, A., Feng, M., Xie, S.-P., Dissard, D., Rankenburg, K., Lough, J. M. and McCulloch, M. T.: Corals record long-term Leeuwin current variability including Ningaloo Nino/Nina since 1795, Nature Communications, 5(1), doi:10.1038/ncomms4607, 2014.			https://www.ncdc.noaa.gov/paleo/study/16316	-28.4589	113.749	-8	Houtman Abrolhos	1848	2010	d18O	permil	carbonate	coral	aragonite	surface seawater		negative	T_water	annual	TRUE	http://lipdverse.org/iso2k/1_0_0/CO14ZIHO.html	DMT (1/14/19)
Ocean2kHR_021	CO14ZIMG	CO14ZIMG02A	Coral	10.1038/srep04393	Zinke, J., Loveday, B. R., Reason, C. J. C., Dullo, W.-C. and Kroon, D.: Madagascar corals track sea surface temperature variability in the Agulhas Current core region over the past 334 years, Scientific Reports, 4(1), doi:10.1038/srep04393, 2014.			https://www.ncdc.noaa.gov/paleo/study/16438	-23.3572	43.6195	-1.1	Tulear Reef, SW Madagascar	1882	1994	d18O	permil	carbonate	coral	aragonite	surface seawater	d18O mirrors interannual and decadal variability in regional SST since 1854 in ERSST, since 1850 in HadSST3 and since 1870 in HadSST1	negative	T_water	annual	TRUE	http://lipdverse.org/iso2k/1_0_0/CO14ZIMG.html	DMT (1/14/19)
Ocean2kHR_022	CO14ZIMG	CO17XISC01A	Coral	10.1038/srep04393	Zinke, J., Loveday, B. R., Reason, C. J. C., Dullo, W.-C. and Kroon, D.: Madagascar corals track sea surface temperature variability in the Agulhas Current core region over the past 334 years, Scientific Reports, 4(1), doi:10.1038/srep04393, 2014.			https://www.ncdc.noaa.gov/paleo/study/16438	-23.3572	43.6195	-1.1	Tulear Reef, SW Madagascar	1905	1994	d18O	permil	carbonate	coral	aragonite	surface seawater	d18O mirrors interannual and decadal variability in regional SST since 1854 in ERSST, since 1850 in HadSST3 and since 1870 in HadSST2	negative	T_water	annual	TRUE	http://lipdverse.org/iso2k/1_0_0/CO14ZIMG.html	DMT (1/14/19)
CO15ABSP01A	CO15ABSP	CO15ABSP01A	Coral	10.1002/2015PA002810	Abram, N. J., Dixon, B. C., Rosevear, M. G., Plunkett, B., Gagan, M. K., Hantoro, W. S. and Phipps, S. J.: Optimized coral reconstructions of the Indian Ocean Dipole: An assessment of location and length considerations, Paleoceanography, 30(10), 1391–1405, doi:10.1002/2015pa002810, 2015.			https://www.ncdc.noaa.gov/paleo/study/18895	-3.1833	100.517	-0.7	Taitaitanopo Island	1959.04	2001.54	d18O	permil	carbonate	coral	aragonite	surface seawater	We found that the correlations with d18O are 0.72 (with total pseudocoral), 0.47 (with SST component), and 0.68 (with SSS component), p < 0.01 for all three (Figure S1), indicating that SSS changes represent a larger fraction of the variance in the coral d18Oanomaly signal than SST changes, as expected from the larger magnitude of interannual SSS variations at this site. Testing several different…	negative	T_water	subannual	TRUE	http://lipdverse.org/iso2k/1_0_0/CO15ABSP.html	DMT (1/14/19)
WEB832ffc0e	CO17DESC01A	CO17DESC01A	Coral	10.1002/2016JC012458	Deng, W., Liu, X., Chen, X., Wei, G., Zeng, T., Xie, L. and Zhao, J.: A comparison of the climates of the Medieval Climate Anomaly, Little Ice Age, and Current Warm Period reconstructed using coral records from the northern South China Sea, Journal of Geophysical Research: Oceans, 122(1), 264–275, doi:10.1002/2016jc012458, 2017.			https://agupubs.onlinelibrary.wiley.com/action/downloadSupplement?doi=10.1002%2F2016JC012458&file=jgrc22050-sup-0002-2016JC012458-ds01.xlsx	19.308	110.667	-6	Hainan Island	1129	1255	d18O	permil	carbonate	coral	aragonite	surface seawater	The paper does not assess correlation between d18O and SST due to lack of instrumental SST and upwelling. My assessment of the data shows a 0.36 correlation between coral D18O and coral Sr/Ca suggesting temp rependcany is low. This suggest the coral d18O is primary a salinity signal. note the authors also provide a coral d18Osw data set.	positive	d18O_seawater	annual	TRUE	http://lipdverse.org/iso2k/1_0_0/CO17DESC01A.html	DMT (1/14/19)
WEB832ffc0e2	CO17DESC02A	CO17DESC02A	Coral	10.1002/2016JC012458	Deng, W., Liu, X., Chen, X., Wei, G., Zeng, T., Xie, L. and Zhao, J.: A comparison of the climates of the Medieval Climate Anomaly, Little Ice Age, and Current Warm Period reconstructed using coral records from the northern South China Sea, Journal of Geophysical Research: Oceans, 122(1), 264–275, doi:10.1002/2016jc012458, 2017.			https://agupubs.onlinelibrary.wiley.com/action/downloadSupplement?doi=10.1002%2F2016JC012458&file=jgrc22050-sup-0002-2016JC012458-ds01.xlsx	19.301	110.662	-6	Hainan Island	1063	1087	d18O	permil	carbonate	coral	aragonite	surface seawater	The paper does not assess correlation between d18O and SST due to lack of instrumental SST and upwelling. My assessment of the data shows a 0.36 correlation between coral D18O and coral Sr/Ca suggesting temp rependcany is low. This suggest the coral d18O is primary a salinity signal. note the authors also provide a coral d18Osw data set.	positive	d18O_seawater	annual	TRUE	http://lipdverse.org/iso2k/1_0_0/CO17DESC02A.html	DMT (1/14/19)
WEB832ffc0e22	CO17DESC03A	CO17DESC03A	Coral	10.1002/2016JC012458	Deng, W., Liu, X., Chen, X., Wei, G., Zeng, T., Xie, L. and Zhao, J.: A comparison of the climates of the Medieval Climate Anomaly, Little Ice Age, and Current Warm Period reconstructed using coral records from the northern South China Sea, Journal of Geophysical Research: Oceans, 122(1), 264–275, doi:10.1002/2016jc012458, 2017.			https://agupubs.onlinelibrary.wiley.com/action/downloadSupplement?doi=10.1002%2F2016JC012458&file=jgrc22050-sup-0002-2016JC012458-ds01.xlsx	19.287	110.656	-6	Hainan Island	1628	1657	d18O	permil	carbonate	coral	aragonite	surface seawater	The paper does not assess correlation between d18O and SST due to lack of instrumental SST and upwelling. My assessment of the data shows a 0.36 correlation between coral D18O and coral Sr/Ca suggesting temp rependcany is low. This suggest the coral d18O is primary a salinity signal. note the authors also provide a coral d18Osw data set.	positive	d18O_seawater	annual	TRUE	http://lipdverse.org/iso2k/1_0_0/CO17DESC03A.html	DMT (1/14/19)
WEB832ffc0e222	CO17DESC04A	CO17DESC04A	Coral	10.1002/2016JC012458	Deng, W., Liu, X., Chen, X., Wei, G., Zeng, T., Xie, L. and Zhao, J.: A comparison of the climates of the Medieval Climate Anomaly, Little Ice Age, and Current Warm Period reconstructed using coral records from the northern South China Sea, Journal of Geophysical Research: Oceans, 122(1), 264–275, doi:10.1002/2016jc012458, 2017.			https://agupubs.onlinelibrary.wiley.com/action/downloadSupplement?doi=10.1002%2F2016JC012458&file=jgrc22050-sup-0002-2016JC012458-ds01.xlsx	19.3198	110.692	-6	Hainan Island	1702	1772	d18O	permil	carbonate	coral	aragonite	surface seawater	The paper does not assess correlation between d18O and SST due to lack of instrumental SST and upwelling. My assessment of the data shows a 0.36 correlation between coral D18O and coral Sr/Ca suggesting temp rependcany is low. This suggest the coral d18O is primary a salinity signal. note the authors also provide a coral d18Osw data set.	positive	d18O_seawater	annual	TRUE	http://lipdverse.org/iso2k/1_0_0/CO17DESC04A.html	DMT (1/14/19)
WEB27c0dc78	CO17LITW01A	CO17LITW01A	Coral	10.1002/2017JC012944	Li, X., Liu, Y., Hsin, Y.-C., Liu, W., Shi, Z., Chiang, H.-W. and Shen, C.-C.: Coral record of variability in the upstream Kuroshio Current during 1953-2004, Journal of Geophysical Research: Oceans, 122(8), 6936–6946, doi:10.1002/2017jc012944, 2017.			This compilation	21.9564	120.762	-5	Nanwan Bay	1953	2004.92	d18O	permil	carbonate	coral	aragonite	surface seawater	monthly coral d18O data to reconstruct a KC transport record with annual to interannual resolution for the interval 1953–2004. The field site is located in southern Taiwan on the western flank of the upstream KC. Increased (reduced) KC transport would generate strong (weak) upwelling, resulting in relatively high (low) local coral d18O.	negative	T_water	subannual	TRUE	http://lipdverse.org/iso2k/1_0_0/CO17LITW01A.html	DMT (1/14/19)
WEB1a9fc096	CO17MUMA	CO17MUMA02A	Coral	10.1002/2017GL075504	Murty, S. A., Goodkin, N. F., Halide, H., Natawidjaja, D., Suwargadi, B., Suprihanto, I., Prayudi, D., Switzer, A. D. and Gordon, A. L.: Climatic Influences on Southern Makassar Strait Salinity Over the Past Century, Geophysical Research Letters, 44(23), 11,967–11,975, doi:10.1002/2017gl075504, 2017.			https://www.ncdc.noaa.gov/paleo/study/24630	-5.382	117.914	-5	Doangdoangan Besar	1926.95	2011.94	d18O	permil	carbonate	coral	aragonite	surface seawater	Authors calculated the contribution of SST to the δ18Ocoral signal, using a δ18O-SST slope of 0.18‰/°C (Gagan et al., 1998) and a range of published δ18O-SSS slopes (Moore, 1995; Fairbanks et al., 1997; Gorman et al., 2012; Morimoto et al., 2002; Conroy et al., 2017; Table S1 and supporting information text). They estimate that SST has a 29–39% inﬂuence on the δ18Ocoral, supporting that SSS drive…	positive	d18O_seawater	subannual	TRUE	http://lipdverse.org/iso2k/1_0_0/CO17MUMA.html	DMT (12/30/19)
WEB0e874eb3	CO17RAPA	CO17RAPA01A	Coral	10.1002/2017PA003098	Ramos, R. D., Goodkin, N. F., Siringan, F. P. and Hughen, K. A.: Diploastrea heliopora Sr/Ca and δ18O records from northeast Luzon, Philippines: An assessment of interspecies coral proxy calibrations and climate controls of sea surface temperature and salinity, Paleoceanography, 32(4), 424–438, doi:10.1002/2017pa003098, 2017.			https://www.ncdc.noaa.gov/paleo/study/22120	18.54	122.15	-5	Palaui Island	1954.04	2012.38	d18O	permil	carbonate	coral	aragonite	surface seawater	Salinity variability for the past half century are qualitatively captured in the Palaui Diploastrea δ18Oc, showing a freshening trend consistent with Porites δ18Oc, instrumental SSS, and coral-based records within the IndoPaciﬁc region. However, a robust Diploastrea δ18Oc and SSS calibration at interannual timescales was not achieved as a result of the competing SST and SSS inﬂuences dampening th…	positive	d18O_seawater	subannual	TRUE	http://lipdverse.org/iso2k/1_0_0/CO17RAPA.html	DMT (1/14/19; updated 12/31/19)
WEB9aced55a	CO17RAPA	CO17RAPA02A	Coral	10.1002/2017PA003098	Ramos, R. D., Goodkin, N. F., Siringan, F. P. and Hughen, K. A.: Diploastrea heliopora Sr/Ca and δ18O records from northeast Luzon, Philippines: An assessment of interspecies coral proxy calibrations and climate controls of sea surface temperature and salinity, Paleoceanography, 32(4), 424–438, doi:10.1002/2017pa003098, 2017.			https://www.ncdc.noaa.gov/paleo/study/22120	18.54	122.15	-5	Palaui Island	1954.04	2012.38	d18O	permil	carbonate	coral	aragonite	surface seawater	Salinity variability for the past half century are qualitatively captured in the Palaui Diploastrea δ18Oc, showing a freshening trend consistent with Porites δ18Oc, instrumental SSS, and coral-based records within the IndoPaciﬁc region. However, a robust Diploastrea δ18Oc and SSS calibration at interannual timescales was not achieved as a result of the competing SST and SSS inﬂuences dampening th…	positive	d18O_seawater	subannual	TRUE	http://lipdverse.org/iso2k/1_0_0/CO17RAPA.html	DMT (1/14/19; updated 12/31/19)
WEB44d2f1ea	CO17WUBO1A	CO17WUBO1A	Coral	10.1038/s41598-017-15942-0	Wu, H. C., Felis, T., Scholz, D., Giry, C., Koelling, M., Jochum, K. P. and Scheffers, S. R.: Changes to Yucatan Peninsula precipitation associated with salinity and temperature extremes of the Caribbean Sea during the Maya civilization collapse, Scientific Reports, 7(1), doi:10.1038/s41598-017-15942-0, 2017.			https://doi.pangaea.de/10.1594/PANGAEA.829390	12.222	-68.3998	0	Northwestern shore	1913.92	1949.58	d18O	permil	carbonate	coral	aragonite	surface seawater		negative	T_water	subannual	TRUE	http://lipdverse.org/iso2k/1_0_0/CO17WUBO1A.html	DMT (1/14/19)
WEB44d2f1ea2	CO17WUBO1B	CO17WUBO1B	Coral	10.1038/s41598-017-15942-0	Wu, H. C., Felis, T., Scholz, D., Giry, C., Koelling, M., Jochum, K. P. and Scheffers, S. R.: Changes to Yucatan Peninsula precipitation associated with salinity and temperature extremes of the Caribbean Sea during the Maya civilization collapse, Scientific Reports, 7(1), doi:10.1038/s41598-017-15942-0, 2017.			https://doi.pangaea.de/10.1594/PANGAEA.829390	12.222	-68.3998	0	Northwestern shore	0.7083	56.0417	d18O	permil	carbonate	coral	aragonite	surface seawater		negative	T_water	subannual	TRUE	http://lipdverse.org/iso2k/1_0_0/CO17WUBO1B.html	DMT (1/14/19)
WEB44d2f1ea22	CO17WUBO1C	CO17WUBO1C	Coral	10.1038/s41598-017-15942-0	Wu, H. C., Felis, T., Scholz, D., Giry, C., Koelling, M., Jochum, K. P. and Scheffers, S. R.: Changes to Yucatan Peninsula precipitation associated with salinity and temperature extremes of the Caribbean Sea during the Maya civilization collapse, Scientific Reports, 7(1), doi:10.1038/s41598-017-15942-0, 2017.			https://doi.pangaea.de/10.1594/PANGAEA.829390	12.222	-68.3998	0	Northwestern shore	0.6667	32.6667	d18O	permil	carbonate	coral	aragonite	surface seawater		negative	T_water	subannual	TRUE	http://lipdverse.org/iso2k/1_0_0/CO17WUBO1C.html	DMT (1/14/19)
WEB44d2f1ea222	CO17WUBO1D	CO17WUBO1D	Coral	10.1038/s41598-017-15942-0	Wu, H. C., Felis, T., Scholz, D., Giry, C., Koelling, M., Jochum, K. P. and Scheffers, S. R.: Changes to Yucatan Peninsula precipitation associated with salinity and temperature extremes of the Caribbean Sea during the Maya civilization collapse, Scientific Reports, 7(1), doi:10.1038/s41598-017-15942-0, 2017.			https://doi.pangaea.de/10.1594/PANGAEA.829390	12.222	-68.3998	0	Northwestern shore	0.8889	27.3889	d18O	permil	carbonate	coral	aragonite	surface seawater		negative	T_water	subannual	TRUE	http://lipdverse.org/iso2k/1_0_0/CO17WUBO1D.html	DMT (1/14/19)
WEB44d2f1ea2222	CO17WUBO1E	CO17WUBO1E	Coral	10.1038/s41598-017-15942-0	Wu, H. C., Felis, T., Scholz, D., Giry, C., Koelling, M., Jochum, K. P. and Scheffers, S. R.: Changes to Yucatan Peninsula precipitation associated with salinity and temperature extremes of the Caribbean Sea during the Maya civilization collapse, Scientific Reports, 7(1), doi:10.1038/s41598-017-15942-0, 2017.			https://doi.pangaea.de/10.1594/PANGAEA.829390	12.222	-68.3998	0	Northwestern shore	0.6668	40.8333	d18O	permil	carbonate	coral	aragonite	surface seawater		negative	T_water	subannual	TRUE	http://lipdverse.org/iso2k/1_0_0/CO17WUBO1E.html	DMT (1/14/19)
WEB44d2f1ea22222	CO17WUBO1F	CO17WUBO1F	Coral	10.1038/s41598-017-15942-0	Wu, H. C., Felis, T., Scholz, D., Giry, C., Koelling, M., Jochum, K. P. and Scheffers, S. R.: Changes to Yucatan Peninsula precipitation associated with salinity and temperature extremes of the Caribbean Sea during the Maya civilization collapse, Scientific Reports, 7(1), doi:10.1038/s41598-017-15942-0, 2017.			https://doi.pangaea.de/10.1594/PANGAEA.829390	12.222	-68.3998	0	Northwestern shore	1909.02	1949.19	d18O	permil	carbonate	coral	aragonite	surface seawater		negative	T_water	subannual	TRUE	http://lipdverse.org/iso2k/1_0_0/CO17WUBO1F.html	DMT (1/14/19)
WEB44d2f1ea222222	CO17WUBO1G	CO17WUBO1G	Coral	10.1038/s41598-017-15942-0	Wu, H. C., Felis, T., Scholz, D., Giry, C., Koelling, M., Jochum, K. P. and Scheffers, S. R.: Changes to Yucatan Peninsula precipitation associated with salinity and temperature extremes of the Caribbean Sea during the Maya civilization collapse, Scientific Reports, 7(1), doi:10.1038/s41598-017-15942-0, 2017.			https://doi.pangaea.de/10.1594/PANGAEA.829390	12.222	-68.3998	0	Northwestern shore	0.5	70.1667	d18O	permil	carbonate	coral	aragonite	surface seawater		negative	T_water	subannual	TRUE	http://lipdverse.org/iso2k/1_0_0/CO17WUBO1G.html	DMT (1/14/19)
WEB396032ca2	CO17XISC01A	CO17XISC01A	Coral	10.1016/j.jseaes.2016.12.012	Xiao, H., Deng, W., Chen, X., Wei, G., Zeng, T. and Zhao, J.: Wet and cold climate conditions recorded by coral geochemical proxies during the beginning of the first millennium CE in the northern South China Sea, Journal of Asian Earth Sciences, 135, 25–34, doi:10.1016/j.jseaes.2016.12.012, 2017.			https://ars-els-cdn-com.libezp.lib.lsu.edu/content/image/1-s2.0-S1367912016304138-mmc1.xlsx	19.395	110.753		Hainan Island	167	309	d18O	permil	carbonate	coral	aragonite	surface seawater		negative	T_water	annual	TRUE	http://lipdverse.org/iso2k/1_0_0/CO17XISC01A.html	DMT (1/14/19; seasonality updated 12/30/19)
WEBd316bfdc	CO18DATO01A	CO18DATO01A	Coral	10.1175/JCLI-D-17-0071.1	Dassie, E. P., Hasson, A., Khodri, M., Lebas, N. and Linsley, B. K.: Spatiotemporal Variability of the South Pacific Convergence Zone Fresh Pool Eastern Front from Coral-Derived Surface Salinity Data, Journal of Climate, 31(8), 3265–3288, doi:10.1175/jcli-d-17-0071.1, 2018.			This compilation	-20.2792	-174.642	-7.5	Fonoifua Island	1883.58	2004.9	d18O	permil	carbonate	coral	aragonite	surface seawater		negative	T_water	subannual	TRUE	http://lipdverse.org/iso2k/1_0_0/CO18DATO01A.html	DMT (1/14/19)
WEB04cd805a	CO18HECO01A	CO18HECO01A	Coral	10.1002/2017PA003181	Hennekam, R., Zinke, J., van Sebille, E., ten Have, M., Brummer, G.-J. A. and Reichart, G.-J.: Cocos (Keeling) Corals Reveal 200 Years of Multidecadal Modulation of Southeast Indian Ocean Hydrology by Indonesian Throughflow, Paleoceanography and Paleoclimatology, 33(1), 48–60, doi:10.1002/2017pa003181, 2018.			https://www.ncdc.noaa.gov/paleo/study/23390	-12.087	96.875	-5.8	Direction Island	1808.17	2010.58	d18O	permil	carbonate	coral	aragonite	surface seawater		negative	T_water	subannual	TRUE	http://lipdverse.org/iso2k/1_0_0/CO18HECO01A.html	DMT (1/14/19)
WEB04cd805a2	CO18HECO01B	CO18HECO01B	Coral	10.1002/2017PA003181	Hennekam, R., Zinke, J., van Sebille, E., ten Have, M., Brummer, G.-J. A. and Reichart, G.-J.: Cocos (Keeling) Corals Reveal 200 Years of Multidecadal Modulation of Southeast Indian Ocean Hydrology by Indonesian Throughflow, Paleoceanography and Paleoclimatology, 33(1), 48–60, doi:10.1002/2017pa003181, 2018.			https://www.ncdc.noaa.gov/paleo/study/23390	-12.087	96.875	-5.8	Direction Island	1988.58	2010.92	d18O	permil	carbonate	coral	aragonite	surface seawater		negative	T_water	subannual	TRUE	http://lipdverse.org/iso2k/1_0_0/CO18HECO01B.html	DMT (1/14/19)
WEBfe31d859	CO18RELC01A	CO18RELC01A	Coral	10.1002/2018PA003321	Von Reumont, J., Hetzinger, S., Garbe-Schoenberg, D., Manfrino, C. and Dullo, C.: Tracking Interannual- to Multidecadal-Scale Climate Variability in the Atlantic Warm Pool Using Central Caribbean Coral Data, Paleoceanography and Paleoclimatology, 33(4), 395–411, doi:10.1002/2018pa003321, 2018.			https://www.ncdc.noaa.gov/paleo/study/23850	19.7	-80.06	-9	Little Cayman	1887.04	2012.54	d18O	permil	carbonate	coral	aragonite	surface seawater		negative	T_water	subannual	TRUE	http://lipdverse.org/iso2k/1_0_0/CO18RELC01A.html	DMT (1/14/19)
CO92SHPU01A	CO92SHPU	CO92SHPU01A	Coral	10.1029/92PA01825	Shen, G. T., Cole, J. E., Lea, D. W., Linn, L. J., McConnaughey, T. A. and Fairbanks, R. G.: Surface ocean variability at Galapagos from 1936-1982: Calibration of geochemical tracers in corals, Paleoceanography, 7(5), 563–588, doi:10.1029/92pa01825, 1992.			https://www.ncdc.noaa.gov/paleo/study/1848	-0.6667	-89.1667	-14	Punta pitt, Isla San Cristobal, Galapagos island, Ecuador	1936	1982.5	d18O	permil	carbonate	coral	aragonite	surface seawater	Linear least squares regressions of four of the tracers (δ18O, δ13O, Ba/Ca, Cd/Ca) against Peruvian SST show highly significant correlations(p<0.0001). Over the annual, biennial, and ENSO (3.8 years) frequency bands, cross‐spectral comparisons show even stronger coherency, with SST frequently accounting for 70–80% of the variance in these tracers.	negative	T_water	subannual	TRUE	http://lipdverse.org/iso2k/1_0_0/CO92SHPU.html	DMT (1/14/19)
Ocean2kHR_178	CO93COTW	CO93COTW01A	Coral	10.1126/science.260.5115.1790	Cole, J. E., Fairbanks, R. G. and Shen, G. T.: Recent Variability in the Southern Oscillation: Isotopic Results from a Tarawa Atoll Coral, Science, 260(5115), 1790–1793, doi:10.1126/science.260.5115.1790, 1993.	10.1002/2014PA002717	Tierney, J. E., Abram, N. J., Anchukaitis, K. J., Evans, M. N., Giry, C., Kilbourne, K. H., Saenger, C. P., Wu, H. C. and Zinke, J.: Tropical sea surface temperatures for the past four centuries reconstructed from coral archives, Paleoceanography, 30(3), 226–252, doi:10.1002/2014pa002717, 2015.	https://www.ncdc.noaa.gov/paleo/study/1845	1.4167	173.033	-3	Tarawa Atoll, Republic of Kiribati	1894	1990	d18O	permil	carbonate	coral	aragonite	surface seawater	At Tarawa, results from an ongoing monitoring program confirm that intenst rainfall alters the d18O and salinity of the surface mixed layer. Shallow-growing corals incorporate this isotopic shift in the d18O of their aragonite skeletons.	positive	d18O_seawater	subannual	TRUE	http://lipdverse.org/iso2k/1_0_0/CO93COTW.html	DMT (1/14/19)
Ocean2kHR_173	CO94DUUR	CO94DUUR01A	Coral	10.1029/93PA03501	Dunbar, R. B., Wellington, G. M., Colgan, M. W. and Glynn, P. W.: Eastern Pacific sea surface temperature since 1600 A.D.: The δ18O record of climate variability in Galapagos Corals, Paleoceanography, 9(2), 291–315, doi:10.1029/93pa03501, 1994.	10.1002/2014PA002717	Tierney, J. E., Abram, N. J., Anchukaitis, K. J., Evans, M. N., Giry, C., Kilbourne, K. H., Saenger, C. P., Wu, H. C. and Zinke, J.: Tropical sea surface temperatures for the past four centuries reconstructed from coral archives, Paleoceanography, 30(3), 226–252, doi:10.1002/2014pa002717, 2015.	https://www.ncdc.noaa.gov/paleo/study/1850	-0.4084	-91.234	-1.5	Urvina Bay, Galapagos Islands	1607	1981	d18O	permil	carbonate	coral	aragonite	surface seawater		negative	T_water	subannual	TRUE	http://lipdverse.org/iso2k/1_0_0/CO94DUUR.html	DMT (1/14/19)
CO94HEAQ02A	CO94HEAQ	CO94HEAQ02A	Coral	{heiss1994coral}	Heiss, G.A. 1994. Coral reefs in the Red Sea: Growth, production and stable isotopes. GEOMAR Report, 32:1-141.			https://www.ncdc.noaa.gov/paleo/study/1854	29.4333	34.9667	-4.5	Aqaba, Jordan	1788	1992	d18O	permil	carbonate	coral	aragonite	surface seawater		negative	T_water	annual	TRUE	http://lipdverse.org/iso2k/1_0_0/CO94HEAQ.html	DMT (1/14/19; seasonality updated 12/30/19)
Ocean2kHR_138	CO94LISE	CO94LISE01A	Coral	10.1029/94JC00360	Linsley, B. K., Dunbar, R. B., Wellington, G. M. and Mucciarone, D. A.: A coral-based reconstruction of Intertropical Convergence Zone variability over Central America since 1707, Journal of Geophysical Research, 99(C5), 9977, doi:10.1029/94jc00360, 1994.	10.1002/2014PA002717	Tierney, J. E., Abram, N. J., Anchukaitis, K. J., Evans, M. N., Giry, C., Kilbourne, K. H., Saenger, C. P., Wu, H. C. and Zinke, J.: Tropical sea surface temperatures for the past four centuries reconstructed from coral archives, Paleoceanography, 30(3), 226–252, doi:10.1002/2014pa002717, 2015.	https://www.ncdc.noaa.gov/paleo/study/1853	7.98	-82.05	-3	Secas Island, Gulf of Chiriqui, Panama	1707.75	1984.5	d18O	permil	carbonate	coral	aragonite	surface seawater	salinity linked to rainfall	positive	d18O_seawater	subannual	TRUE	http://lipdverse.org/iso2k/1_0_0/CO94LISE.html	DMT (1/14/19); KLD
Ocean2kHR_172	CO95TUNG	CO95TUNG01A	Coral	10.1016/0012-821X(95)00156-7	Tudhope, A. W., Shimmield, G. B., Chilcott, C. P., Jebb, M., Fallick, A. E. and Dalgleish, A. N.: Recent changes in climate in the far western equatorial Pacific and their relationship to the Southern Oscillation; oxygen isotope records from massive corals, Papua New Guinea, Earth and Planetary Science Letters, 136(3-4), 575–590, doi:10.1016/0012-821x(95)00156-7, 1995.			https://www.ncdc.noaa.gov/paleo/study/1844	-5.22	145.82	-3	Madang, Papua New Guinea	1922.54	1991.29	d18O	permil	carbonate	coral	aragonite	surface seawater	There is a good visual match between the smoothed coral record and the similarly smoothed Madang rainfall record for the period from the late 1950s onwards (Fig. 3B). Periods of low rainfall coincide with deposition of isotopically heavy skeleton.... Periods of high amplitude of annual cycle tend to coincide in both records, and these periods tend to occur during the El Nifio phase of the Souther…	positive	d18O_seawater	subannual	TRUE	http://lipdverse.org/iso2k/1_0_0/CO95TUNG.html	DMT (1/14/19; updated 12/31/19)
Ocean2kHR_133	CO96QUVA	CO96QUVA01A	Coral	10.1016/S0277-3791(05)80005-8, 10.1029/96GL03169	Quinn, T. M., Taylor, F. W. and Crowley, T. J.: A 173 year stable isotope record from a tropical south pacific coral 0, Quaternary Science Reviews, 12(6), 407–418, doi:10.1016/s0277-3791(05)80005-8, 1993.	10.1029/96GL03169	Quinn, T. M., Crowley, T. J. and Taylor, F. W.: New stable isotope results from a 173-year coral from Espiritu Santo, Vanuatu, Geophysical Research Letters, 23(23), 3413–3416, doi:10.1029/96gl03169, 1996.	https://www.ncdc.noaa.gov/paleo/study/1839	-15	167	-1	Tangoa Island, Vanuatu	1807	1979	d18O	permil	carbonate	coral	aragonite	surface seawater	Comparison of the d180 with SST and rainfall records indicates a correlation of 0.71 and 0.54, respectively, over the 13-year interval where data overlaps (Fig. 2). Just as in the precipitation and SST comparison, the correlation is much higher at the annual cycle (coherence of 0.95). There is also a slight suggestion of coherence at the El Nino time scale, but the calibration time series is too …	negative	T_water	subannual	TRUE	http://lipdverse.org/iso2k/1_0_0/CO96QUVA.html	DMT (1/14/19); KLD
CO96SWBB01A	CO96SWBB	CO96SWBB01A	Coral	10.2307/3515246	Swart, P. K., Dodge, R. E. and Hudson, H. J.: A 240-Year Stable Oxygen and Carbon Isotopic Record in a Coral from South Florida: Implications for the Prediction of Precipitation in Southern Florida, PALAIOS, 11(4), 362, doi:10.2307/3515246, 1996.	10.1002/2014PA002717	Tierney, J. E., Abram, N. J., Anchukaitis, K. J., Evans, M. N., Giry, C., Kilbourne, K. H., Saenger, C. P., Wu, H. C. and Zinke, J.: Tropical sea surface temperatures for the past four centuries reconstructed from coral archives, Paleoceanography, 30(3), 226–252, doi:10.1002/2014pa002717, 2015.	https://www.ncdc.noaa.gov/paleo/study/1885	25.3903	-80.1715	-10	Alinas Reef, Biscayne National Park, Florida	1751	1986	d18O	permil	carbonate	coral	aragonite	surface seawater	when precipitation is greater than average, precipitation is inversely correlated with d18O reflecting the input of isotopical depleted precipitation, and vice versa reflectin ghte input of isotopically heavy weaters from the Everglades.	negative	P_E	subannual	TRUE	http://lipdverse.org/iso2k/1_0_0/CO96SWBB.html	DMT (1/14/19)
CO96SWFB01A	CO96SWFB	CO96SWFB01A	Coral	10.1016/0031-0182(95)00078-X, 10.1016/0168-9622(91)90055-2, 10.1002/2014PA002717	Swart, P. K., Healy, G. F., Dodge, R. E., Kramer, P., Hudson, J. H., Halley, R. B. and Robblee, M. B.: The stable oxygen and carbon isotopic record from a coral growing in Florida Bay: a 160 year record of climatic and anthropogenic influence, Palaeogeography, Palaeoclimatology, Palaeoecology, 123(1-4), 219–237, doi:10.1016/0031-0182(95)00078-x, 1996.	10.1016/0168-9622(91)90055-2	Swart, P. K., Burns, S. J. and Leder, J. J.: Fractionation of the stable isotopes of oxygen and carbon in carbon dioxide during the reaction of calcite with phosphoric acid as a function of temperature and technique, Chemical Geology: Isotope Geoscience section, 86(2), 89–96, doi:10.1016/0168-9622(91)90055-2, 1991.	https://www.ncdc.noaa.gov/paleo/study/1886	24.9167	-80.75	-5	Lignumvitae Basin, Florida Bay	1824	1985	d18O	permil	carbonate	coral	aragonite	surface seawater	The higher skeletal d18O value reflects the high d180 value of the Bay water itself (Lloyd, 1964; Swart et al., 1989), which is enriched in d18O as a result of evaporation and the input of 1so enriched freshwater from the Everglades (Meyers et al., 1993). Salinity values are the highest during the summer, as a result of evaporation, and lower during the winter when the Bay becomes dominated by wa…	positive	d18O_seawater	annual	TRUE	http://lipdverse.org/iso2k/1_0_0/CO96SWFB.html	DMT (1/14/19)
Ocean2kHR_011	CO97CHSY	CO97CHSY01A	Coral	10.1126/science.277.5328.925	Charles, C. D.: Interaction Between the ENSO and the Asian Monsoon in a Coral Record of Tropical Climate, Science, 277(5328), 925–928, doi:10.1126/science.277.5328.925, 1997.	10.1002/2014PA002717	Tierney, J. E., Abram, N. J., Anchukaitis, K. J., Evans, M. N., Giry, C., Kilbourne, K. H., Saenger, C. P., Wu, H. C. and Zinke, J.: Tropical sea surface temperatures for the past four centuries reconstructed from coral archives, Paleoceanography, 30(3), 226–252, doi:10.1002/2014pa002717, 2015.	https://www.ncdc.noaa.gov/paleo/study/1857	-4.6062	55.4244	-7	Beau Vallon Bay, Mahe Island, Republic of the Seychelles	1846.54	1995.13	d18O	permil	carbonate	coral	aragonite	surface seawater	At the Seychelles, however, one would expect the seasonal temperature variability (of more than 2i¿½C) to dominate the nearly constant d18O of seawater	negative	T_water	subannual	TRUE	http://lipdverse.org/iso2k/1_0_0/CO97CHSY.html	DMT (1/14/19)
Ocean2kHR_132	CO98BOFP	CO98BOFP01A	Coral	10.1029/98PA02502,10.1029/1999GL900595	Boiseau, M., Juillet-Leclerc, A., Yiou, P., Salvat, B., Isdale, P. and Guillaume, M.: Atmospheric and oceanic evidences of El Nino-Southern Oscillation events in the south central Pacific Ocean from coral stable isotopic records over the last 137 years, Paleoceanography, 13(6), 671–685, doi:10.1029/98pa02502, 1998.	10.1029/1999GL900595	Boiseau, M., Ghil, M. and Juillet-Leclerc, A.: Climatic trends and interdecadal variability from south-central Pacific coral records, Geophysical Research Letters, 26(18), 2881–2884, doi:10.1029/1999gl900595, 1999.	https://www.ncdc.noaa.gov/paleo/study/1876	-17.5	-149.833	-5	Moorea, French Polynesia	1852.5	1990.5	d18O	permil	carbonate	coral	aragonite	surface seawater	The relative distributionof rainfall and SST versus time (Figure4) compared with d18O versus core depth over the 1979-1990 period emphasizes a strong similarity between SST and d18O	negative	T_water	subannual	TRUE	http://lipdverse.org/iso2k/1_0_0/CO98BOFP.html	DMT (1/14/19); KLD
CO98CHPI01A	CO98CHPI	CO98CHPI01A	Coral	10.1007/BF02841599	Chakraborty, S., and R. Ramesh. 1998. Stable isotope variations in a coral (Favia speciosa) from the Gulf of Kutch during 1948-1989 AD: Environmental implications. Proceedings of the Indian Academy of Science (Earth and Planetary Sciences) 107(4):331-341.			https://www.ncdc.noaa.gov/paleo/study/1901	22.6	70	-1	Pirotan Island	1948	1989.5	d18O	permil	carbonate	coral	aragonite	surface seawater		negative	T_water	subannual	TRUE	http://lipdverse.org/iso2k/1_0_0/CO98CHPI.html	DMT (1/14/19)
Ocean2kHR_135	CO98EVXM	CO98EVXM01A	Coral	10.1038/29424	Evans, M. N., Fairbanks, R. G. and Rubenstone, J. L.: A proxy index of ENSO teleconnections, Nature, 394(6695), 732–733, doi:10.1038/29424, 1998.			https://www.ncdc.noaa.gov/paleo/study/1847	1.6792	-157.247	9	Kiritimati	1938.29	1993.62	d18O	permil	carbonate	coral	aragonite	surface seawater		negative	T_water	subannual	TRUE	http://lipdverse.org/iso2k/1_0_0/CO98EVXM.html	DMT (1/14/19); KLD
CO98QUNC01A	CO98QUNC	CO98QUNC01A	Coral	10.1029/98PA00401, 10.1029/96PA01859, 10.1029/97PA01348, 10.1029/1999PA900032, 10.1038/nclimate1583, 10.1016/j.palaeo.2012.08.019	Quinn, T. M., Crowley, T. J., Taylor, F. W., Henin, C., Joannot, P. and Join, Y.: A multicentury stable isotope record from a New Caledonia coral: Interannual and decadal sea surface temperature variability in the southwest Pacific since 1657 A.D, Paleoceanography, 13(4), 412–426, doi:10.1029/98pa00401, 1998.	10.1029/96PA01859	Quinn, T. M., Taylor, F. W., Crowley, T. J. and Link, S. M.: Evaluation of sampling resolution in coral stable isotope records: A case study using records from New Caledonia and Tarawa, Paleoceanography, 11(5), 529–542, doi:10.1029/96pa01859, 1996.	https://www.ncdc.noaa.gov/paleo/study/1843	-22.48	166.45	-3	Amedee Island, New Caledonia	1657.75	1992.75	d18O	permil	carbonate	coral	aragonite	surface seawater	Calibration between the instrument (local SST and gridded GISST2) and proxy records was evaluated using two regression techniques: standard ordinary least sqaures and reduced major axis.	negative	T_water	subannual	TRUE	http://lipdverse.org/iso2k/1_0_0/CO98QUNC.html	DMT (1/14/19)
CO98SWPR01A	CO98SWPR	CO98SWPR01A	Coral	10.1029/98JC02404	Swart, P. K., White, K. S., Enfield, D., Dodge, R. E. and Milne, P.: Stable oxygen isotopic composition of corals from the Gulf of Guinea as indicators of periods of extreme precipitation conditions in the sub-Sahara, Journal of Geophysical Research: Oceans, 103(C12), 27885–27891, doi:10.1029/98jc02404, 1998.			https://www.ncdc.noaa.gov/paleo/study/1913	1.6667	7.5833	-5	Principe, Gulf of Guinea	1939	1992	d18O	permil	carbonate	coral	aragonite	surface seawater		positive	d18O_seawater	annual	TRUE	http://lipdverse.org/iso2k/1_0_0/CO98SWPR.html	DMT (1/14/19)
CO99DRGB01A	CO99DRGB	CO99DRGB01A	Coral	10.1029/1999JC900212	Druffel, E. R. M. and Griffin, S.: Variability of surface ocean radiocarbon and stable isotopes in the southwestern Pacific, Journal of Geophysical Research: Oceans, 104(C10), 23607–23613, doi:10.1029/1999jc900212, 1999.			https://www.ncdc.noaa.gov/paleo/study/1911	-22.1	153	-10	Abraham Reef, Great Barrier Reef, Australia	1638.3	1983.3	d18O	permil	carbonate	coral	aragonite	surface seawater	Oxygen isotope records in banded corals( i¿½!80) are mainly controlled by water composition (i.e., seawater salinity) and sea surface temperature (SST) at the time of accretion	negative	T_water	annual	TRUE	http://lipdverse.org/iso2k/1_0_0/CO99DRGB.html	DMT (1/14/19)
CO99GUMI01B	CO99GUMI	CO99GUMI01B	Coral	10.1029/1999PA900024	Guilderson, T. P. and Schrag, D. P.: Reliability of coral isotope records from the Western Pacific Warm Pool: A comparison using age-optimized records, Paleoceanography, 14(4), 457–464, doi:10.1029/1999pa900024, 1999.	10.1002/2014PA002717	Tierney, J. E., Abram, N. J., Anchukaitis, K. J., Evans, M. N., Giry, C., Kilbourne, K. H., Saenger, C. P., Wu, H. C. and Zinke, J.: Tropical sea surface temperatures for the past four centuries reconstructed from coral archives, Paleoceanography, 30(3), 226–252, doi:10.1002/2014pa002717, 2015.	https://www.ncdc.noaa.gov/paleo/study/1842	-0.533	166.928	-14	Nauru	1891.75	1995.25	d18O	permil	carbonate	coral	aragonite	surface seawater	The observed d180 decrease that occurs between 1952 and 1995 (-0.5 permil) equates to a -2.5C warming, an -2 permil decrease in salinity [Fairbanks et al., 1997], or some combination thereof. Instrumental and reconstructed SSTs of a slightly larger region [Reynolds and Smith, 1994; Kaplan et al., 1998] do show an -0.5C increase which can only be partly responsible for the observed trend in the co…	negative	T_water	subannual	TRUE	http://lipdverse.org/iso2k/1_0_0/CO99GUMI.html	DMT (1/14/19; updated 12/31/19)
CO99KUHO01Ab	CO99KUHO	CO99KUHO01A	Coral	10.1007/s003380050147	Kuhnert, H., Paetzold, J., Hatcher, B., Wyrwoll, K.-H., Eisenhauer, A., Collins, L. B., Zhu, Z. R. and Wefer, G.: A 200-year coral stable oxygen isotope record from a high-latitude reef off Western Australia, Coral Reefs, 18(1), 1–12, doi:10.1007/s003380050147, 1999.			https://www.ncdc.noaa.gov/paleo/study/1856	-28.4617	113.768	-5	Houtman Abrolhos Islands	1794.75	1993.92	d18O	permil	carbonate	coral	aragonite	surface seawater		negative	T_water	subannual	TRUE	http://lipdverse.org/iso2k/1_0_0/CO99KUHO.html	DMT (1/14/19)
CO99LICL03A	CO99LICL	CO99LICL03A	Coral	10.1007/s003380050148	Linsley, B. K., Messier, R. G. and Dunbar, R. B.: Assessing between-colony oxygen isotope variability in the coral Porites lobata at Clipperton Atoll, Coral Reefs, 18(1), 13–27, doi:10.1007/s003380050148, 1999.	10.1002/2014PA002717	Tierney, J. E., Abram, N. J., Anchukaitis, K. J., Evans, M. N., Giry, C., Kilbourne, K. H., Saenger, C. P., Wu, H. C. and Zinke, J.: Tropical sea surface temperatures for the past four centuries reconstructed from coral archives, Paleoceanography, 30(3), 226–252, doi:10.1002/2014pa002717, 2015.	https://www.ncdc.noaa.gov/paleo/study/1846	10.2773	-109.213	-8.2	Clipperton Atoll	1893.79	1994.04	d18O	permil	carbonate	coral	aragonite	surface seawater		negative	T_water	subannual	TRUE	http://lipdverse.org/iso2k/1_0_0/CO99LICL.html	DMT (1/14/19)
CO99SWFB01A	CO99SWFB	CO99SWFB01A	Coral	10.2307/1353206, 10.1016/0031-0182(95)00078-X, 10.1016/0168-9622(91)90055-2	Swart, P. K., Healy, G., Greer, L., Lutz, M., Saied, A., Anderegg, D., Dodge, R. E. and Rudnick, D.: The Use of Proxy Chemical Records in Coral Skeletons to Ascertain Past Environmental Conditions in Florida Bay, Estuaries, 22(2), 384, doi:10.2307/1353206, 1999.	10.1016/0031-0182(95)00078-X	Swart, P. K., Healy, G. F., Dodge, R. E., Kramer, P., Hudson, J. H., Halley, R. B. and Robblee, M. B.: The stable oxygen and carbon isotopic record from a coral growing in Florida Bay: a 160 year record of climatic and anthropogenic influence, Palaeogeography, Palaeoclimatology, Palaeoecology, 123(1-4), 219–237, doi:10.1016/0031-0182(95)00078-x, 1996.	https://www.ncdc.noaa.gov/paleo/study/1914	24.9167	-80.75	-5	Lignumvitae Basin, Florida Bay	1899	1996	d18O	permil	carbonate	coral	aragonite	surface seawater	This relationship between the d180 of the water (~w) and salinity is shown in Eqn. 2 and Fig. 2 (r = +0.71, n = 38, p > 0.05). Salinity = 4.98dw + 25.89 (2) Combining Eqns. (1) and (2), an expression (Eqn. 3) is derived expressing salinity in terms of the ~c and T. Salinity = 4.98delta18Ocoral + 1.18T + 19.62 (3) The confirmation of a positive correlation between salinity and the d180 (ffthe wate…	positive	d18O_seawater	subannual	TRUE	http://lipdverse.org/iso2k/1_0_0/CO99SWFB.html	DMT (1/14/19)
WEB73fbe78c	GI19POYU	GI19POYU01A	GroundIce	10.1038/s41467-019-09622-y	Porter, T. J., Schoenemann, S. W., Davies, L. J., Steig, E. J., Bandara, S. and Froese, D. G.: Recent summer warming in northwestern Canada exceeds the Holocene thermal maximum, Nature Communications, 10(1), doi:10.1038/s41467-019-09622-y, 2019.			this compilation	65.21	-138.32	740	DHP174 site, Yukon, NW Canada	-11635	2013	d2H	permil	pore ice	pore ice	syngenetic pore ice	precipitation	Condensation temperature influence on isotopic distilation of continental moisture	positive	P_isotope	JJAS	TRUE	http://lipdverse.org/iso2k/1_0_0/GI19POYU.html	TP
WEBf7bafce3	GI19POYU	GI19POYU01B	GroundIce	10.1038/s41467-019-09622-y	Porter, T. J., Schoenemann, S. W., Davies, L. J., Steig, E. J., Bandara, S. and Froese, D. G.: Recent summer warming in northwestern Canada exceeds the Holocene thermal maximum, Nature Communications, 10(1), doi:10.1038/s41467-019-09622-y, 2019.			this compilation	65.21	-138.32	740	DHP174 site, Yukon, NW Canada	-11635	2013	d18O	permil	pore ice	pore ice	syngenetic pore ice	precipitation	Condensation temperature influence on isotopic distilation of continental moisture	positive	P_isotope	JJAS	TRUE	http://lipdverse.org/iso2k/1_0_0/GI19POYU.html	TP
IC00COPR01A	IC00COPR	IC00COPR01A	GlacierIce	10.1007/978-3-642-61113-1_13	Mosley-Thompson, E.: Holocene Climate Changes Recorded in an East Antarctica Ice Core, Climatic Variations and Forcing Mechanisms of the Last 2000 Years, 263–279, doi:10.1007/978-3-642-61113-1_13, 1996.	10.1006/qres.2000.2172	Masson, V., Vimeux, F., Jouzel, J., Morgan, V., Delmotte, M., Ciais, P., Hammer, C., Johnsen, S., Lipenkov, V. Y., Mosley-Thompson, E., Petit, J.-R., Steig, E. J., Stievenard, M. and Vaikmae, R.: Holocene Climate Variability in Antarctica Based on 11 Ice-Core Isotopic Records, Quaternary Research, 54(3), 348–358, doi:10.1006/qres.2000.2172, 2000.	https://www.ncdc.noaa.gov/paleo-search/study/22479	-84	43	3330	Plateau Remote	2	1986	d18O	permil	glacier ice	glacier ice		precipitation	spatial slope (Jouzel et al., 2003,Magnitude of isotope/temperature scaling for interpretation of central Antarctic ice cores https://doi.org/10.1029/2002JD002677)	positive	P_isotope	annual	TRUE	http://lipdverse.org/iso2k/1_0_0/IC00COPR.html	AO (01/16/2019)
IC00EIGG01A	IC00EIGG	IC00EIGG01A	GlacierIce	10.3189/172756500781833098	Eichler, A., Schwikowski, M., Gaeggeler, H. W., Furrer, V., Synal, H.-A., Beer, J., Saurer, M. and Funk, M.: Glaciochemical dating of an ice core from upper Grenzgletscher (4200 m a.s.l.), Journal of Glaciology, 46(154), 507–515, doi:10.3189/172756500781833098, 2000.			this compilation	45.9244	7.8675	4200	Grenzgletscher	1936	1994	d18O	permil	glacier ice	glacier ice		precipitation	Dansgaard W. 1964. Stable isotopes in precipitation. Tellus 16: 436a€“468.	positive	P_isotope	annual	TRUE	http://lipdverse.org/iso2k/1_0_0/IC00EIGG.html
IC00OE0202A	IC00OE02	IC00OE0202A	GlacierIce	10.3189/172756402781816492	Graf, W., Oerter, H., Reinwarth, O., Stichler, W., Wilhelms, F., Miller, H. and Mulvaney, R.: Stable-isotope records from Dronning Maud Land, Antarctica, Annals of Glaciology, 35, 195–201, doi:10.3189/172756402781816492, 2002.	10.3189/172756400781820705	Oerter, H., Wilhelms, F., Jung-Rothenhaeusler, F., Goektas, F., Miller, H., Graf, W. and Sommer, S.: Accumulation rates in Dronning Maud Land, Antarctica, as revealed by dielectric-profiling measurements of shallow firn cores, Annals of Glaciology, 30, 27–34, doi:10.3189/172756400781820705, 2000.	https://doi.pangaea.de/10.1594/PANGAEA.104876	-74.97	3.92	3014	DML Plateau (DML02) SS9813	1801	1997	d18O	permil	glacier ice	glacier ice		precipitation	Graf et al., 2002 https://doi.org/10.3189/172756402781816492 DML spatial slope calibration	positive	P_isotope	annual	TRUE	http://lipdverse.org/iso2k/1_0_0/IC00OE02.html	AO (01/16/2019)
IC00OE0302A	IC00OE03	IC00OE0302A	GlacierIce	10.3189/172756402781816492	Graf, W., Oerter, H., Reinwarth, O., Stichler, W., Wilhelms, F., Miller, H. and Mulvaney, R.: Stable-isotope records from Dronning Maud Land, Antarctica, Annals of Glaciology, 35, 195–201, doi:10.3189/172756402781816492, 2002.	10.3189/172756400781820705	Oerter, H., Wilhelms, F., Jung-Rothenhaeusler, F., Goektas, F., Miller, H., Graf, W. and Sommer, S.: Accumulation rates in Dronning Maud Land, Antarctica, as revealed by dielectric-profiling measurements of shallow firn cores, Annals of Glaciology, 30, 27–34, doi:10.3189/172756400781820705, 2000.	https://doi.pangaea.de/10.1594/PANGAEA.104879	-74.5	1.96	2843	DML Plateau (DML03) FB9809	1801	1997	d18O	permil	glacier ice	glacier ice		precipitation	Graf et al., 2002 https://doi.org/10.3189/172756402781816492 DML spatial slope calibration	positive	P_isotope	annual	TRUE	http://lipdverse.org/iso2k/1_0_0/IC00OE03.html	AO (01/16/2019)
IC00OE0503A	IC00OE05	IC00OE0503A	GlacierIce	10.3189/172756402781816492	Graf, W., Oerter, H., Reinwarth, O., Stichler, W., Wilhelms, F., Miller, H. and Mulvaney, R.: Stable-isotope records from Dronning Maud Land, Antarctica, Annals of Glaciology, 35, 195–201, doi:10.3189/172756402781816492, 2002.	10.3189/172756400781820705	Oerter, H., Wilhelms, F., Jung-Rothenhaeusler, F., Goektas, F., Miller, H., Graf, W. and Sommer, S.: Accumulation rates in Dronning Maud Land, Antarctica, as revealed by dielectric-profiling measurements of shallow firn cores, Annals of Glaciology, 30, 27–34, doi:10.3189/172756400781820705, 2000.	https://doi.pangaea.de/10.1594/PANGAEA.104880	-75	0.04	2882	DML Plateau (DML05) FB9807	1758	1997	d18O	permil	glacier ice	glacier ice		precipitation	Graf et al., 2002 https://doi.org/10.3189/172756402781816492 DML spatial slope calibration	positive	P_isotope	annual	TRUE	http://lipdverse.org/iso2k/1_0_0/IC00OE05.html	AO (01/16/2019)
IC00OE1101A	IC00OE11	IC00OE1101A	GlacierIce	10.3189/172756402781816492	Graf, W., Oerter, H., Reinwarth, O., Stichler, W., Wilhelms, F., Miller, H. and Mulvaney, R.: Stable-isotope records from Dronning Maud Land, Antarctica, Annals of Glaciology, 35, 195–201, doi:10.3189/172756402781816492, 2002.	10.3189/172756400781820705	Oerter, H., Wilhelms, F., Jung-Rothenhaeusler, F., Goektas, F., Miller, H., Graf, W. and Sommer, S.: Accumulation rates in Dronning Maud Land, Antarctica, as revealed by dielectric-profiling measurements of shallow firn cores, Annals of Glaciology, 30, 27–34, doi:10.3189/172756400781820705, 2000.	https://doi.pangaea.de/10.1594/PANGAEA.104883	-74.85	-8.5	2600	DML Plateau (DML11) FB9803	1921	1997	d18O	permil	glacier ice	glacier ice		precipitation	Graf et al., 2002 https://doi.org/10.3189/172756402781816492 DML spatial slope calibration	positive	P_isotope	annual	TRUE	http://lipdverse.org/iso2k/1_0_0/IC00OE11.html	AO (01/16/2019)
IC00OE1201A	IC00OE12	IC00OE1201A	GlacierIce	10.3189/172756402781816492	Graf, W., Oerter, H., Reinwarth, O., Stichler, W., Wilhelms, F., Miller, H. and Mulvaney, R.: Stable-isotope records from Dronning Maud Land, Antarctica, Annals of Glaciology, 35, 195–201, doi:10.3189/172756402781816492, 2002.	10.3189/172756400781820705	Oerter, H., Wilhelms, F., Jung-Rothenhaeusler, F., Goektas, F., Miller, H., Graf, W. and Sommer, S.: Accumulation rates in Dronning Maud Land, Antarctica, as revealed by dielectric-profiling measurements of shallow firn cores, Annals of Glaciology, 30, 27–34, doi:10.3189/172756400781820705, 2000.	https://doi.pangaea.de/10.1594/PANGAEA.104884	-75	-6.5	2680	DML Plateau (DML12) FB9817	1800	1997	d18O	permil	glacier ice	glacier ice		precipitation	Graf et al., 2002 https://doi.org/10.3189/172756402781816492 DML spatial slope calibration	positive	P_isotope	annual	TRUE	http://lipdverse.org/iso2k/1_0_0/IC00OE12.html	AO (01/16/2019)
IC00OE1301A	IC00OE13	IC00OE1301A	GlacierIce	10.3189/172756402781816492	Graf, W., Oerter, H., Reinwarth, O., Stichler, W., Wilhelms, F., Miller, H. and Mulvaney, R.: Stable-isotope records from Dronning Maud Land, Antarctica, Annals of Glaciology, 35, 195–201, doi:10.3189/172756402781816492, 2002.	10.3189/172756400781820705	Oerter, H., Wilhelms, F., Jung-Rothenhaeusler, F., Goektas, F., Miller, H., Graf, W. and Sommer, S.: Accumulation rates in Dronning Maud Land, Antarctica, as revealed by dielectric-profiling measurements of shallow firn cores, Annals of Glaciology, 30, 27–34, doi:10.3189/172756400781820705, 2000.	https://doi.pangaea.de/10.1594/PANGAEA.104885	-75	-4.51	2740	DML Plateau (DML13) FB9816	1800	1997	d18O	permil	glacier ice	glacier ice		precipitation	Graf et al., 2002 https://doi.org/10.3189/172756402781816492 DML spatial slope calibration	positive	P_isotope	annual	TRUE	http://lipdverse.org/iso2k/1_0_0/IC00OE13.html	AO (01/16/2019)
IC00OE1401A	IC00OE14	IC00OE1401A	GlacierIce	10.3189/172756402781816492	Graf, W., Oerter, H., Reinwarth, O., Stichler, W., Wilhelms, F., Miller, H. and Mulvaney, R.: Stable-isotope records from Dronning Maud Land, Antarctica, Annals of Glaciology, 35, 195–201, doi:10.3189/172756402781816492, 2002.	10.3189/172756400781820705	Oerter, H., Wilhelms, F., Jung-Rothenhaeusler, F., Goektas, F., Miller, H., Graf, W. and Sommer, S.: Accumulation rates in Dronning Maud Land, Antarctica, as revealed by dielectric-profiling measurements of shallow firn cores, Annals of Glaciology, 30, 27–34, doi:10.3189/172756400781820705, 2000.	https://doi.pangaea.de/10.1594/PANGAEA.104886	-74.96	-1.5	2840	DML Plateau (DML14) FB9815	1801	1997	d18O	permil	glacier ice	glacier ice		precipitation	Graf et al., 2002 https://doi.org/10.3189/172756402781816492 DML spatial slope calibration	positive	P_isotope	annual	TRUE	http://lipdverse.org/iso2k/1_0_0/IC00OE14.html	AO (01/16/2019)
IC00OE1501A	IC00OE15	IC00OE1501A	GlacierIce	10.3189/172756402781816492	Graf, W., Oerter, H., Reinwarth, O., Stichler, W., Wilhelms, F., Miller, H. and Mulvaney, R.: Stable-isotope records from Dronning Maud Land, Antarctica, Annals of Glaciology, 35, 195–201, doi:10.3189/172756402781816492, 2002.	10.3189/172756400781820705	Oerter, H., Wilhelms, F., Jung-Rothenhaeusler, F., Goektas, F., Miller, H., Graf, W. and Sommer, S.: Accumulation rates in Dronning Maud Land, Antarctica, as revealed by dielectric-profiling measurements of shallow firn cores, Annals of Glaciology, 30, 27–34, doi:10.3189/172756400781820705, 2000.	https://doi.pangaea.de/10.1594/PANGAEA.104887	-75.08	2.5	2970	DML Plateau (DML15) FB9814	1801	1997	d18O	permil	glacier ice	glacier ice		precipitation	Graf et al., 2002 https://doi.org/10.3189/172756402781816492 DML spatial slope calibration	positive	P_isotope	annual	TRUE	http://lipdverse.org/iso2k/1_0_0/IC00OE15.html	AO (01/16/2019)
IC00OE1601A	IC00OE16	IC00OE1601A	GlacierIce	10.3189/172756402781816492	Graf, W., Oerter, H., Reinwarth, O., Stichler, W., Wilhelms, F., Miller, H. and Mulvaney, R.: Stable-isotope records from Dronning Maud Land, Antarctica, Annals of Glaciology, 35, 195–201, doi:10.3189/172756402781816492, 2002.	10.3189/172756499781821445	Isaksson, E., van den Broeke, M. R., Winther, J.-G., Karloef, L., Francis Pinglot, J. and Gundestrup, N.: Accumulation and proxy-temperature variability in Dronning Maud Land, Antarctica, determined from shallow firn cores, Annals of Glaciology, 29, 17–22, doi:10.3189/172756499781821445, 1999.	https://doi.pangaea.de/10.1594/PANGAEA.104878	-75.17	5	3100	DML Plateau (DML16) FB9813	1800	1997	d18O	permil	glacier ice	glacier ice		precipitation	Graf et al., 2002 https://doi.org/10.3189/172756402781816492 DML spatial slope calibration	positive	P_isotope	annual	TRUE	http://lipdverse.org/iso2k/1_0_0/IC00OE16.html	AO (01/16/2019)
IC00OE1801A	IC00OE18	IC00OE1801A	GlacierIce	10.3189/172756402781816492	Graf, W., Oerter, H., Reinwarth, O., Stichler, W., Wilhelms, F., Miller, H. and Mulvaney, R.: Stable-isotope records from Dronning Maud Land, Antarctica, Annals of Glaciology, 35, 195–201, doi:10.3189/172756402781816492, 2002.	10.3189/172756499781821445	Isaksson, E., van den Broeke, M. R., Winther, J.-G., Karloef, L., Francis Pinglot, J. and Gundestrup, N.: Accumulation and proxy-temperature variability in Dronning Maud Land, Antarctica, determined from shallow firn cores, Annals of Glaciology, 29, 17–22, doi:10.3189/172756499781821445, 1999.	https://doi.pangaea.de/10.1594/PANGAEA.104889	-75.25	-6	3160	DML Plateau (DML18) FB9804	1801	1996	d18O	permil	glacier ice	glacier ice		precipitation	Graf et al., 2002 https://doi.org/10.3189/172756402781816492 DML spatial slope calibration	positive	P_isotope	annual	TRUE	http://lipdverse.org/iso2k/1_0_0/IC00OE18.html	AO (01/16/2019)
IC00OE1901A	IC00OE19	IC00OE1901A	GlacierIce	10.3189/172756402781816492	Graf, W., Oerter, H., Reinwarth, O., Stichler, W., Wilhelms, F., Miller, H. and Mulvaney, R.: Stable-isotope records from Dronning Maud Land, Antarctica, Annals of Glaciology, 35, 195–201, doi:10.3189/172756402781816492, 2002.	10.3189/172756499781821445	Isaksson, E., van den Broeke, M. R., Winther, J.-G., Karloef, L., Francis Pinglot, J. and Gundestrup, N.: Accumulation and proxy-temperature variability in Dronning Maud Land, Antarctica, determined from shallow firn cores, Annals of Glaciology, 29, 17–22, doi:10.3189/172756499781821445, 1999.	https://doi.pangaea.de/10.1594/PANGAEA.104890	-75.17	-1	2630	DML Plateau (DML19) FB9805	1800	1997	d18O	permil	glacier ice	glacier ice		precipitation	Graf et al., 2002 https://doi.org/10.3189/172756402781816492 DML spatial slope calibration	positive	P_isotope	annual	TRUE	http://lipdverse.org/iso2k/1_0_0/IC00OE19.html	AO (01/16/2019)
IC00OE2001A	IC00OE20	IC00OE2001A	GlacierIce	10.3189/172756402781816492	Graf, W., Oerter, H., Reinwarth, O., Stichler, W., Wilhelms, F., Miller, H. and Mulvaney, R.: Stable-isotope records from Dronning Maud Land, Antarctica, Annals of Glaciology, 35, 195–201, doi:10.3189/172756402781816492, 2002.	10.3189/172756400781820705	Oerter, H., Wilhelms, F., Jung-Rothenhaeusler, F., Goektas, F., Miller, H., Graf, W. and Sommer, S.: Accumulation rates in Dronning Maud Land, Antarctica, as revealed by dielectric-profiling measurements of shallow firn cores, Annals of Glaciology, 30, 27–34, doi:10.3189/172756400781820705, 2000.	https://doi.pangaea.de/10.1594/PANGAEA.104891	-74.75	1	2840	DML Plateau (DML20) FB9808	1801	1997	d18O	permil	glacier ice	glacier ice		precipitation	Graf et al., 2002 https://doi.org/10.3189/172756402781816492 DML spatial slope calibration	positive	P_isotope	annual	TRUE	http://lipdverse.org/iso2k/1_0_0/IC00OE20.html	AO (01/16/2019)
IC00OE2101A	IC00OE21	IC00OE2101A	GlacierIce	10.3189/172756402781816492	Graf, W., Oerter, H., Reinwarth, O., Stichler, W., Wilhelms, F., Miller, H. and Mulvaney, R.: Stable-isotope records from Dronning Maud Land, Antarctica, Annals of Glaciology, 35, 195–201, doi:10.3189/172756402781816492, 2002.	10.3189/172756400781820705	Oerter, H., Wilhelms, F., Jung-Rothenhaeusler, F., Goektas, F., Miller, H., Graf, W. and Sommer, S.: Accumulation rates in Dronning Maud Land, Antarctica, as revealed by dielectric-profiling measurements of shallow firn cores, Annals of Glaciology, 30, 27–34, doi:10.3189/172756400781820705, 2000.	https://doi.pangaea.de/10.1594/PANGAEA.104873	-74.67	4	2980	DML Plateau (DML21) FB9810	1801	1997	d18O	permil	glacier ice	glacier ice		precipitation	Graf et al., 2002 https://doi.org/10.3189/172756402781816492 DML spatial slope calibration	positive	P_isotope	annual	TRUE	http://lipdverse.org/iso2k/1_0_0/IC00OE21.html	AO (01/16/2019)
IC00OE2201A	IC00OE22	IC00OE2201A	GlacierIce	10.3189/172756402781816492	Graf, W., Oerter, H., Reinwarth, O., Stichler, W., Wilhelms, F., Miller, H. and Mulvaney, R.: Stable-isotope records from Dronning Maud Land, Antarctica, Annals of Glaciology, 35, 195–201, doi:10.3189/172756402781816492, 2002.	10.3189/172756400781820705	Oerter, H., Wilhelms, F., Jung-Rothenhaeusler, F., Goektas, F., Miller, H., Graf, W. and Sommer, S.: Accumulation rates in Dronning Maud Land, Antarctica, as revealed by dielectric-profiling measurements of shallow firn cores, Annals of Glaciology, 30, 27–34, doi:10.3189/172756400781820705, 2000.	https://doi.pangaea.de/10.1594/PANGAEA.104874	-75.08	6.5	3160	DML Plateau (DML22) FB9811	1801	1997	d18O	permil	glacier ice	glacier ice		precipitation	Graf et al., 2002 https://doi.org/10.3189/172756402781816492 DML spatial slope calibration	positive	P_isotope	annual	TRUE	http://lipdverse.org/iso2k/1_0_0/IC00OE22.html	AO (01/16/2019)
IC00OE2301A	IC00OE23	IC00OE2301A	GlacierIce	10.3189/172756402781816492	Graf, W., Oerter, H., Reinwarth, O., Stichler, W., Wilhelms, F., Miller, H. and Mulvaney, R.: Stable-isotope records from Dronning Maud Land, Antarctica, Annals of Glaciology, 35, 195–201, doi:10.3189/172756402781816492, 2002.	10.3189/172756400781820705	Oerter, H., Wilhelms, F., Jung-Rothenhaeusler, F., Goektas, F., Miller, H., Graf, W. and Sommer, S.: Accumulation rates in Dronning Maud Land, Antarctica, as revealed by dielectric-profiling measurements of shallow firn cores, Annals of Glaciology, 30, 27–34, doi:10.3189/172756400781820705, 2000.	https://doi.pangaea.de/10.1594/PANGAEA.104894	-75.25	6.5	3160	DML Plateau (DML23) FB9812	1810	1997	d18O	permil	glacier ice	glacier ice		precipitation	Graf et al., 2002 https://doi.org/10.3189/172756402781816492 DML spatial slope calibration	positive	P_isotope	annual	TRUE	http://lipdverse.org/iso2k/1_0_0/IC00OE23.html	AO (01/16/2019)
IC00OEKC01A	IC00OEKC	IC00OEKC01A	GlacierIce	10.3189/172756402781816492	Graf, W., Oerter, H., Reinwarth, O., Stichler, W., Wilhelms, F., Miller, H. and Mulvaney, R.: Stable-isotope records from Dronning Maud Land, Antarctica, Annals of Glaciology, 35, 195–201, doi:10.3189/172756402781816492, 2002.	10.3189/172756400781820705	Oerter, H., Wilhelms, F., Jung-Rothenhaeusler, F., Goektas, F., Miller, H., Graf, W. and Sommer, S.: Accumulation rates in Dronning Maud Land, Antarctica, as revealed by dielectric-profiling measurements of shallow firn cores, Annals of Glaciology, 30, 27–34, doi:10.3189/172756400781820705, 2000.	https://doi.pangaea.de/10.1594/PANGAEA.728240	-74.21	-9.75	1439	DML Plateau (Kottas Camp) FB9802	1881	1997	d18O	permil	glacier ice	glacier ice		precipitation	Graf et al., 2002 https://doi.org/10.3189/172756402781816492 DML spatial slope calibration	positive	P_isotope	annual	TRUE	http://lipdverse.org/iso2k/1_0_0/IC00OEKC.html	AO (01/16/2019)
IC00SC1601A	IC00SC16	IC00SC1601A	GlacierIce	10.5194/cp-12-171-2016	WeiSSbach, S., Wegner, A., Opel, T., Oerter, H., Vinther, B. M. and Kipfstuhl, S.: Spatial and temporal oxygen isotope variability in northern Greenland – implications for a new climate record over the past millennium, Climate of the Past, 12(2), 171–188, doi:10.5194/cp-12-171-2016, 2016.			https://doi.pangaea.de/10.1594/PANGAEA.849161	73.9402	-37.6299	3040	B16	1478	1992	d18O	permil	glacier ice	glacier ice		precipitation	Dansgaard W. 1964. Stable isotopes in precipitation. Tellus 16: 436?468.	positive	P_isotope	annual	TRUE	http://lipdverse.org/iso2k/1_0_0/IC00SC16.html
IC00SC1801A	IC00SC18	IC00SC1801A	GlacierIce	10.5194/cp-12-171-2016	WeiSSbach, S., Wegner, A., Opel, T., Oerter, H., Vinther, B. M. and Kipfstuhl, S.: Spatial and temporal oxygen isotope variability in northern Greenland – implications for a new climate record over the past millennium, Climate of the Past, 12(2), 171–188, doi:10.5194/cp-12-171-2016, 2016.			https://doi.pangaea.de/10.1594/PANGAEA.849161	76.617	-36.4033	2508	B18	874	1992	d18O	permil	glacier ice	glacier ice		precipitation	Dansgaard W. 1964. Stable isotopes in precipitation. Tellus 16: 436?468.	positive	P_isotope	annual	TRUE	http://lipdverse.org/iso2k/1_0_0/IC00SC18.html
IC00SC2101A	IC00SC21	IC00SC2101A	GlacierIce	10.5194/cp-12-171-2016	WeiSSbach, S., Wegner, A., Opel, T., Oerter, H., Vinther, B. M. and Kipfstuhl, S.: Spatial and temporal oxygen isotope variability in northern Greenland – implications for a new climate record over the past millennium, Climate of the Past, 12(2), 171–188, doi:10.5194/cp-12-171-2016, 2016.			https://doi.pangaea.de/10.1594/PANGAEA.849161	80	-41.1374	2185	B21	1372	1993	d18O	permil	glacier ice	glacier ice		precipitation	Dansgaard W. 1964. Stable isotopes in precipitation. Tellus 16: 436?468.	positive	P_isotope	annual	TRUE	http://lipdverse.org/iso2k/1_0_0/IC00SC21.html
IC00SC2601A	IC00SC26	IC00SC2601A	GlacierIce	10.2312/BzP_0362_2000	WeiSSbach, S., Wegner, A., Opel, T., Oerter, H., Vinther, B. M. and Kipfstuhl, S.: Spatial and temporal oxygen isotope variability in northern Greenland – implications for a new climate record over the past millennium, Climate of the Past, 12(2), 171–188, doi:10.5194/cp-12-171-2016, 2016.			https://doi.pangaea.de/10.1594/PANGAEA.849161	77.2533	-49.2167	2598	B26	1505	1994	d18O	permil	glacier ice	glacier ice		precipitation	Dansgaard W. 1964. Stable isotopes in precipitation. Tellus 16: 436?468.	positive	P_isotope	annual	TRUE	http://lipdverse.org/iso2k/1_0_0/IC00SC26.html
IC00SC2901A	IC00SC29	IC00SC2901A	GlacierIce	10.5194/cp-12-171-2016	WeiSSbach, S., Wegner, A., Opel, T., Oerter, H., Vinther, B. M. and Kipfstuhl, S.: Spatial and temporal oxygen isotope variability in northern Greenland – implications for a new climate record over the past millennium, Climate of the Past, 12(2), 171–188, doi:10.5194/cp-12-171-2016, 2016.			https://doi.pangaea.de/10.1594/PANGAEA.849161	76.0039	-43.492	2874	B29	1471	1994	d18O	permil	glacier ice	glacier ice		precipitation	Dansgaard W. 1964. Stable isotopes in precipitation. Tellus 16: 436?468.	positive	P_isotope	annual	TRUE	http://lipdverse.org/iso2k/1_0_0/IC00SC29.html
IC00STHN01A	IC00STHN	IC00STHN01A	GlacierIce	10.3189/172756500781832774	Stenni, B., Serra, F., Frezzotti, M., Maggi, V., Traversi, R., Becagli, S. and Udisti, R.: Snow accumulation rates in northern Victoria Land, Antarctica, by firn-core analysis, Journal of Glaciology, 46(155), 541–552, doi:10.3189/172756500781832774, 2000.			https://www.ncdc.noaa.gov/paleo-search/study/22589	-73.1	165.4	2960	Hercules NA©vA©	1770	1992	d18O	permil	glacier ice	glacier ice		precipitation	spatial slope (Jouzel et al., 2003,Magnitude of isotope/temperature scaling for interpretation of central Antarctic ice cores https://doi.org/10.1029/2002JD002677)	positive	P_isotope	annual	TRUE	http://lipdverse.org/iso2k/1_0_0/IC00STHN.html	AO (01/16/2019)
IC00STTY01A	IC00STTY	IC00STTY01A	GlacierIce	10.1111/j.0435-3676.2000.00122.x	Steig, E. J., Morse, D. L., Waddington, E. D., Stuiver, M., Grootes, P. M., Mayewski, P. A., Twickler, M. S. and Whitlow, S. I.: Wisconsinan and holocene climate history from an ice core at taylor dome, western ross embayment, antarctica, Geografiska Annaler: Series A, Physical Geography, 82(2-3), 213–235, doi:10.1111/j.0435-3676.2000.00122.x, 2000.			https://www.ncdc.noaa.gov/paleo-search/study/2415	-77.78	158.72	2365	Taylor Dome	0.674627	1939.3	d18O	permil	glacier ice	glacier ice		precipitation	spatial slope (Jouzel et al., 2003,Magnitude of isotope/temperature scaling for interpretation of central Antarctic ice cores https://doi.org/10.1029/2002JD002677)	positive	P_isotope	annual	TRUE	http://lipdverse.org/iso2k/1_0_0/IC00STTY.html	AO (01/16/2019)
IC00THDS03B	IC00THDS	IC00THDS03B	GlacierIce	10.1126/science.289.5486.1916	Thompson, L. G.: A High-Resolution Millennial Record of the South Asian Monsoon from Himalayan Ice Cores, Science, 289(5486), 1916–1919, doi:10.1126/science.289.5486.1916, 2000.			https://www.ncdc.noaa.gov/paleo-search/study/11180	28.38	85.72	7200	Dasuopu	1010	1997	d18O	permil	glacier ice	glacier ice		precipitation	Yao, T., Thompson, L. G., Mosley-Thompson, E., Zhihong, Y., Xingping, Z., and Lin, P.-N.: 1996,Climatological Significance of I´18O in North Tibetan Ice Cores, J. Geophys. Res. 101, 29531a€“29537	positive	P_isotope	JJA	TRUE	http://lipdverse.org/iso2k/1_0_0/IC00THDS.html	TO
IC00THDS03A	IC00THDS	IC00THDS03A	GlacierIce	10.1126/science.289.5486.1916	Thompson, L. G.: A High-Resolution Millennial Record of the South Asian Monsoon from Himalayan Ice Cores, Science, 289(5486), 1916–1919, doi:10.1126/science.289.5486.1916, 2000.			https://www.ncdc.noaa.gov/paleo-search/study/11180	28.38	85.72	7200	Dasuopu	1450	1996	d18O	permil	glacier ice	glacier ice		precipitation	Yao, T., Thompson, L. G., Mosley-Thompson, E., Zhihong, Y., Xingping, Z., and Lin, P.-N.: 1996,Climatological Significance of ?18O in North Tibetan Ice Cores, J. Geophys. Res. 101, 29531?29537	positive	P_isotope	JJA	TRUE	http://lipdverse.org/iso2k/1_0_0/IC00THDS.html	TO
IC01JO0101A	IC01JO01	IC01JO0101A	GlacierIce	10.1029/2000GL012243	Jouzel, J., Masson, V., Cattani, O., Falourd, S., Stievenard, M., Stenni, B., Longinelli, A., Johnsen, S. J., Steffenssen, J. P., Petit, J. R., Schwander, J., Souchez, R. and Barkov, N. I.: A new 27 ky high resolution East Antarctic climate record, Geophysical Research Letters, 28(16), 3199–3202, doi:10.1029/2000gl012243, 2001.			https://www.ncdc.noaa.gov/paleo-search/study/2492	-75.1	123.39	3233	EDC Dome C	2.6	1918.94	d18O	permil	glacier ice	glacier ice		precipitation	spatial slope (Jouzel et al., 2003,Magnitude of isotope/temperature scaling for interpretation of central Antarctic ice cores https://doi.org/10.1029/2002JD002677)	positive	P_isotope	annual	TRUE	http://lipdverse.org/iso2k/1_0_0/IC01JO01.html	AO (01/16/2019)
IC02GR0501A	IC02GR05	IC02GR0501A	GlacierIce	10.3189/172756402781816492	Graf, W., Oerter, H., Reinwarth, O., Stichler, W., Wilhelms, F., Miller, H. and Mulvaney, R.: Stable-isotope records from Dronning Maud Land, Antarctica, Annals of Glaciology, 35, 195–201, doi:10.3189/172756402781816492, 2002.			https://doi.pangaea.de/10.1594/PANGAEA.104862	-75	0.01	2882	B32Site DML05	166	1996	d18O	permil	glacier ice	glacier ice		precipitation	Graf et al., 2002 https://doi.org/10.3189/172756402781816492 DML spatial slope calibration	positive	P_isotope	annual	TRUE	http://lipdverse.org/iso2k/1_0_0/IC02GR05.html	AO (01/16/2019)
IC02GR0701A	IC02GR07	IC02GR0701A	GlacierIce	10.3189/172756402781816492	Graf, W., Oerter, H., Reinwarth, O., Stichler, W., Wilhelms, F., Miller, H. and Mulvaney, R.: Stable-isotope records from Dronning Maud Land, Antarctica, Annals of Glaciology, 35, 195–201, doi:10.3189/172756402781816492, 2002.			https://doi.pangaea.de/10.1594/PANGAEA.104882	-75.58	-3.43	2669	B31Site DML07	1000	1994	d18O	permil	glacier ice	glacier ice		precipitation	Graf et al., 2002 https://doi.org/10.3189/172756402781816492 DML spatial slope calibration	positive	P_isotope	annual	TRUE	http://lipdverse.org/iso2k/1_0_0/IC02GR07.html	AO (01/16/2019)
IC02GR1701A	IC02GR17	IC02GR1701A	GlacierIce	10.3189/172756402781816492	Graf, W., Oerter, H., Reinwarth, O., Stichler, W., Wilhelms, F., Miller, H. and Mulvaney, R.: Stable-isotope records from Dronning Maud Land, Antarctica, Annals of Glaciology, 35, 195–201, doi:10.3189/172756402781816492, 2002.			https://doi.pangaea.de/10.1594/PANGAEA.104888	-75.17	6.5	3160	B33Site DML17	1000	1997	d18O	permil	glacier ice	glacier ice		precipitation	spatial slope (Jouzel et al., 2003,Magnitude of isotope/temperature scaling for interpretation of central Antarctic ice cores https://doi.org/10.1029/2002JD002677)	positive	P_isotope	annual	TRUE	http://lipdverse.org/iso2k/1_0_0/IC02GR17.html	AO (01/16/2019)
IC02HEWD01A	IC02HEWD	IC02HEWD01A	GlacierIce	{henderson2002ice}				https://www.ncdc.noaa.gov/paleo-search/study/22543	81	64	509	Windy Dome	1225	1995	d18O	permil	glacier ice	glacier ice		precipitation	Dansgaard W. 1964. Stable isotopes in precipitation. Tellus 16: 436?468.	positive	P_isotope	annual	TRUE	http://lipdverse.org/iso2k/1_0_0/IC02HEWD.html
IC02MUBI01A	IC02MUBI	IC02MUBI01A	GlacierIce	10.3189/172756402781817176	Mulvaney, R., Oerter, H., Peel, D. A., Graf, W., Arrowsmith, C., Pasteur, E. C., Knight, B., Littot, G. C. and Miners, W. D.: 1000 year ice-core records from Berkner Island, Antarctica, Annals of Glaciology, 35, 45–51, doi:10.3189/172756402781817176, 2002.			https://doi.pangaea.de/10.1594/PANGAEA.227734	-79.57	-45.72	890	Berkner Island (South) B25	1000	1992	d18O	permil	glacier ice	glacier ice		precipitation	spatial slope (Jouzel et al., 2003,Magnitude of isotope/temperature scaling for interpretation of central Antarctic ice cores https://doi.org/10.1029/2002JD002677)	positive	P_isotope	annual	TRUE	http://lipdverse.org/iso2k/1_0_0/IC02MUBI.html	AO (01/16/2019)
IC02SCGN01A	IC02SCGN	IC02SCGN01A	GlacierIce	10.3189/172756402781816915	Schlosser, E. and Oerter, H.: Shallow firn cores from Neumayer, Ekstroemisen, Antarctica: a comparison of accumulation rates and stable-isotope ratios, Annals of Glaciology, 35, 91–96, doi:10.3189/172756402781816915, 2002.			https://www.ncdc.noaa.gov/paleo/study/23233	-70.62	-8.37	40	DML Georg-von-Neumayer Station B04	1892	1981	d18O	permil	glacier ice	glacier ice		precipitation	Schlosser 2002: "the observed variations in d18O cannot be explained using the emperature data. Factors other than temperature, such as changes in atmospheric circulation, must be involved."	positive	P_isotope	annual	TRUE	http://lipdverse.org/iso2k/1_0_0/IC02SCGN.html	AO (01/16/2019)
IC02STTA02A	IC02STTA	IC02STTA02A	GlacierIce	10.1029/2000JD000317	Stenni, B., Proposito, M., Gragnani, R., Flora, O., Jouzel, J., Falourd, S. and Frezzotti, M.: Eight centuries of volcanic signal and climate change at Talos Dome (East Antarctica), Journal of Geophysical Research: Atmospheres, 107(D9), ACL 3–1–ACL 3–13, doi:10.1029/2000jd000317, 2002.			https://www.ncdc.noaa.gov/paleo/study/22712	-72.8	159.06	2316	TD96 Talos Dome	1232	1995	d2H	permil	glacier ice	glacier ice		precipitation	Stenni et al., 2002 : spatial correlation, A d18O temperature gradient of about 0.6permil/A°C was calculated between the two sites. This value is very close to the data reported by Lorius and Merlivat [1977] for present-day East Antarctic precipitation and by Stenni et al. [2000] for the Northern Victoria Land.	positive	P_isotope	annual	TRUE	http://lipdverse.org/iso2k/1_0_0/IC02STTA.html	AO (01/16/2019)
IC02THKI05A	IC02THKI	IC02THKI05A	GlacierIce	10.1126/science.1073198	Thompson, L. G.: Kilimanjaro Ice Core Records: Evidence of Holocene Climate Change in Tropical Africa, Science, 298(5593), 589–593, doi:10.1126/science.1073198, 2002.			https://www.ncdc.noaa.gov/paleo-search/study/2466	-3.08	37.35	5893	Kilimanjaro SIF2	460	1950	d18O	permil	glacier ice	glacier ice		precipitation	Dansgaard W. 1964. Stable isotopes in precipitation. Tellus 16: 436a€“468.	positive	P_isotope	annual	TRUE	http://lipdverse.org/iso2k/1_0_0/IC02THKI.html	TO
IC02THKI02A	IC02THKI	IC02THKI02A	GlacierIce	10.1126/science.1073198	Thompson, L. G.: Kilimanjaro Ice Core Records: Evidence of Holocene Climate Change in Tropical Africa, Science, 298(5593), 589–593, doi:10.1126/science.1073198, 2002.			https://www.ncdc.noaa.gov/paleo-search/study/2466	-3.08	37.35	5893	Kilimanjaro SIF2	460	1950	d18O	permil	glacier ice	glacier ice		precipitation	Dansgaard W. 1964. Stable isotopes in precipitation. Tellus 16: 436a€“468.	positive	P_isotope	annual	TRUE	http://lipdverse.org/iso2k/1_0_0/IC02THKI.html	TO
IC02THKI03A	IC02THKI	IC02THKI03A	GlacierIce	10.1126/science.1073198	Thompson, L. G.: Kilimanjaro Ice Core Records: Evidence of Holocene Climate Change in Tropical Africa, Science, 298(5593), 589–593, doi:10.1126/science.1073198, 2002.			https://www.ncdc.noaa.gov/paleo-search/study/2466	-3.08	37.35	5893	Kilimanjaro SIF2	460	1950	d18O	permil	glacier ice	glacier ice		precipitation	Dansgaard W. 1964. Stable isotopes in precipitation. Tellus 16: 436a€“468.	positive	P_isotope	annual	TRUE	http://lipdverse.org/iso2k/1_0_0/IC02THKI.html	TO
IC02THKI04A	IC02THKI	IC02THKI04A	GlacierIce	10.1126/science.1073198	Thompson, L. G.: Kilimanjaro Ice Core Records: Evidence of Holocene Climate Change in Tropical Africa, Science, 298(5593), 589–593, doi:10.1126/science.1073198, 2002.			https://www.ncdc.noaa.gov/paleo-search/study/2466	-3.08	37.35	5893	Kilimanjaro SIF2	460	1950	d18O	permil	glacier ice	glacier ice		precipitation	Dansgaard W. 1964. Stable isotopes in precipitation. Tellus 16: 436a€“468.	positive	P_isotope	annual	TRUE	http://lipdverse.org/iso2k/1_0_0/IC02THKI.html	TO
IC03HOIL01A	IC03HOIL	IC03HOIL01A	GlacierIce	10.1029/2002GL014870	Hoffmann, G., Ramirez, E., Taupin, J. D., Francou, B., Ribstein, P., Delmas, R., Duerr, H., Gallaire, R., Simoes, J., Schotterer, U., Stievenard, M. and Werner, M.: Coherent isotope history of Andean ice cores over the last century, Geophysical Research Letters, 30(4), doi:10.1029/2002gl014870, 2003.			this compilation	-16.62	-67.77	6350	Illimani	1771	1998	d2H	permil	glacier ice	glacier ice		precipitation	Less (more) depletion of the water isotopes correlates well with anomalously dry (wet) conditions over the Amazon in agreement with the isotopic amount effect [Dansgaard, 1964]., Comparison with general circulation model results and meteorological data suggest that the Andean high altitude records are primarily controlled by precipitation variability over the Amazon basin."	positive	P_isotope	annual	TRUE	http://lipdverse.org/iso2k/1_0_0/IC03HOIL.html	TO
IC03HORB01A	IC03HORB	IC03HORB01A	GlacierIce	10.1016/S1352-2310(02)00582-4	Shugui, H., Dahe, Q., Dongqi, Z., Shichang, K., Mayewski, P. A. and Wake, C. P.: A 154a high-resolution ammonium record from the Rongbuk Glacier, north slope of Mt. Qomolangma (Everest), Tibet–Himal region, Atmospheric Environment, 37(5), 721–729, doi:10.1016/s1352-2310(02)00582-4, 2003.			https://www.ncdc.noaa.gov/paleo-search/study/2469	27.98	86.92	6500	East Rongbuk Glacier	1843.9	1997.93	d18O	permil	glacier ice	glacier ice		precipitation			P_isotope	annual	TRUE	http://lipdverse.org/iso2k/1_0_0/IC03HORB.html	TO
IC04FIML01A	IC04FIML	IC04FIML01A	GlacierIce	10.7202/013147ar	Fisher, D. A., Wake, C., Kreutz, K., Yalcin, K., Steig, E., Mayewski, P., Anderson, L., Zheng, J., Rupper, S., Zdanowicz, C., Demuth, M., Waszkiewicz, M., Dahl-Jensen, D., Goto-Azuma, K., Bourgeois, J. B., Koerner, R. M., Sekerka, J., Osterberg, E., Abbott, M. B., Finney, B. P. and Burns, S. J.: Stable Isotope Records from Mount Logan, Eclipse Ice Cores and Nearby Jellybean Lake. Water Cycle of t…			this compilation	60.59	-140.5	5340	Mt Logan (PRCol)	560	1995	d18O	permil	glacier ice	glacier ice		precipitation		positive	P_isotope	annual	TRUE	http://lipdverse.org/iso2k/1_0_0/IC04FIML.html	TO
IC05ISAU01A	IC05ISAU	IC05ISAU01A	GlacierIce	10.1111/j.0435-3676.2005.00253.x	Isaksson, E., Divine, D., Kohler, J., Martma, T., Pohjola, V., Motoyama, H. and Watanabe, O.: Climate oscillations as recorded in svalbard ice core ω18o records between ad 1200 and 1997, Geografiska Annaler: Series A, Physical Geography, 87(1), 203–214, doi:10.1111/j.0435-3676.2005.00253.x, 2005.	10.1191/0959683605hl820rp	Isaksson, E., Kohler, J., Pohjola, V., Moore, J., Igarashi, M., Karloef, L., Martma, T., Meijer, H., Motoyama, H., Vaikmaee, R. and van de Wal, R. S. W.: Two ice-core δ18O records from Svalbard illustrating climate and sea-ice variability over the last 400 years, The Holocene, 15(4), 501–509, doi:10.1191/0959683605hl820rp, 2005.	https://www.ncdc.noaa.gov/paleo-search/study/11173	79.83	24	750	Austfonna	1400	1998	d18O	permil	glacier ice	glacier ice		precipitation	Dansgaard W. 1964. Stable isotopes in precipitation. Tellus 16: 436?468.	positive	P_isotope	annual	TRUE	http://lipdverse.org/iso2k/1_0_0/IC05ISAU.html	TO
IC06KAS101A	IC06KAS1	IC06KAS101A	GlacierIce	10.3189/172756404781814186	Kaczmarska, M., Isaksson, E., Karloef, L., Winther, J.-G., Kohler, J., Godtliebsen, F., Olsen, L. R., Hofstede, C. M., Van Den Broeke, M. R., Van De Wal, R. S. W. and Gundestrup, N.: Accumulation variability derived from an ice core from coastal Dronning Maud Land, Antarctica, Annals of Glaciology, 39, 339–345, doi:10.3189/172756404781814186, 2004.			https://www.ncdc.noaa.gov/paleo/study/23232	-70.24	4.8	48	DML Fimbulisen S100	1737	1999	d18O	permil	glacier ice	glacier ice		precipitation	spatial slope (Jouzel et al., 2003,Magnitude of isotope/temperature scaling for interpretation of central Antarctic ice cores https://doi.org/10.1029/2002JD002677)	positive	P_isotope	annual	TRUE	http://lipdverse.org/iso2k/1_0_0/IC06KAS1.html	AO (01/16/2019)
IC06THDD01A	IC06THDD	IC06THDD01A	GlacierIce	10.1073/pnas.0603900103	Thompson, L. G., Mosley-Thompson, E., Brecher, H., Davis, M., Leon, B., Les, D., Lin, P.-N., Mashiotta, T. and Mountain, K.: Abrupt tropical climate change: Past and present, Proceedings of the National Academy of Sciences, 103(28), 10536–10543, doi:10.1073/pnas.0603900103, 2006.			https://www.ncdc.noaa.gov/paleo/study/12942	38.1	96.4	5325	Dunde Ice Cap	1010	1987	d18O	permil	glacier ice	glacier ice		precipitation		positive	P_isotope	annual	TRUE	http://lipdverse.org/iso2k/1_0_0/IC06THDD.html	TO
IC06VID301A	IC06VID3	IC06VID301A	GlacierIce	10.1029/2005JD006921	Vinther, B. M., Clausen, H. B., Johnsen, S. J., Rasmussen, S. O., Andersen, K. K., Buchardt, S. L., Dahl-Jensen, D., Seierstad, I. K., Siggaard-Andersen, M.-L., Steffensen, J. P., Svensson, A., Olsen, J. and Heinemeier, J.: A synchronized dating of three Greenland ice cores throughout the Holocene, Journal of Geophysical Research, 111(D13), doi:10.1029/2005jd006921, 2006.			https://www.ncdc.noaa.gov/paleo/study/2494	65.18	-43.83	2480	DYE-3	-9700	1960	d18O	permil	glacier ice	glacier ice		precipitation	Dansgaard W. 1964. Stable isotopes in precipitation. Tellus 16: 436?468.	positive	P_isotope	annual	TRUE	http://lipdverse.org/iso2k/1_0_0/IC06VID3.html	DVD
IC06VIGR01A	IC06VIGR	IC06VIGR01A	GlacierIce	10.1029/2005JD006921	Vinther, B. M., Clausen, H. B., Johnsen, S. J., Rasmussen, S. O., Andersen, K. K., Buchardt, S. L., Dahl-Jensen, D., Seierstad, I. K., Siggaard-Andersen, M.-L., Steffensen, J. P., Svensson, A., Olsen, J. and Heinemeier, J.: A synchronized dating of three Greenland ice cores throughout the Holocene, Journal of Geophysical Research, 111(D13), doi:10.1029/2005jd006921, 2006.			https://www.ncdc.noaa.gov/paleo/study/2494	72.3	-37.4	3238	GRIP Full	-9700	1960	d18O	permil	glacier ice	glacier ice		precipitation	Dansgaard W. 1964. Stable isotopes in precipitation. Tellus 16: 436?468.	positive	P_isotope	annual	TRUE	http://lipdverse.org/iso2k/1_0_0/IC06VIGR.html	DVD
IC06VING01A	IC06VING	IC06VING01A	GlacierIce	10.1029/2005JD006921	Vinther, B. M., Clausen, H. B., Johnsen, S. J., Rasmussen, S. O., Andersen, K. K., Buchardt, S. L., Dahl-Jensen, D., Seierstad, I. K., Siggaard-Andersen, M.-L., Steffensen, J. P., Svensson, A., Olsen, J. and Heinemeier, J.: A synchronized dating of three Greenland ice cores throughout the Holocene, Journal of Geophysical Research, 111(D13), doi:10.1029/2005jd006921, 2006.			https://www.ncdc.noaa.gov/paleo/study/2494	75.1	-42.32	2917	NGRIP	-9700	1960	d18O	permil	glacier ice	glacier ice		precipitation	Dansgaard W. 1964. Stable isotopes in precipitation. Tellus 16: 436a€“468.	positive	P_isotope	annual	TRUE	http://lipdverse.org/iso2k/1_0_0/IC06VING.html	DVD
IC06WAML01A	IC06WAML	IC06WAML01A	GlacierIce	10.1007/s11430-006-1079-9	Wang, N., Yao, T., Pu, J., Zhang, Y. and Sun, W.: Climatic and environmental changes over the last millennium recorded in the Malan ice core from the northern Tibetan Plateau, Science in China Series D: Earth Sciences, 49(10), 1079–1089, doi:10.1007/s11430-006-1079-9, 2006.			https://www.ncdc.noaa.gov/paleo-search/study/21171	35.81	90.76	5680	Malan Glacier	1129	1999	d18O	permil	glacier ice	glacier ice		precipitation	Tian, L., V. Masson-Delmotte, M. Stievenard, T. Yao and J. Jouzel.2001. Tibetan Plateau summer monsoon northward extent revealed by measurements of water stable isotopes.J. Geophys. Res., 106(D22), 28,081?28,088.	positive	P_isotope	annual	TRUE	http://lipdverse.org/iso2k/1_0_0/IC06WAML.html	TO
IC07KADF01A	IC07KADF	IC07KADF01A	GlacierIce	10.1038/nature01525, 10.1038/nature06015, 10.1016/j.polar.2011.08.001, 10.5194/tcd-8-769-2014	Watanabe, O., Jouzel, J., Johnsen, S., Parrenin, F., Shoji, H. and Yoshida, N.: Homogeneous climate variability across East Antarctica over the past three glacial cycles, Nature, 422(6931), 509–512, doi:10.1038/nature01525, 2003.	10.1016/j.polar.2011.08.001	Igarashi, M., Nakai, Y., Motizuki, Y., Takahashi, K., Motoyama, H. and Makishima, K.: Dating of the Dome Fuji shallow ice core based on a record of volcanic eruptions from AD 1260 to AD 2001, Polar Science, 5(4), 411–420, doi:10.1016/j.polar.2011.08.001, 2011.	https://www.ncdc.noaa.gov/paleo-search/study/22471	-77.32	39.7	3810	Dome F 1993	423.794	1467.21	d18O	permil	glacier ice	glacier ice		precipitation	spatial slope (Jouzel et al., 2003,Magnitude of isotope/temperature scaling for interpretation of central Antarctic ice cores https://doi.org/10.1029/2002JD002677)	positive	P_isotope	annual	TRUE	http://lipdverse.org/iso2k/1_0_0/IC07KADF.html	AO (01/16/2019)
IC07KARB01A	IC07KARB	IC07KARB01A	GlacierIce	10.1029/2007GL030440	Kaspari, S., Mayewski, P., Kang, S., Sneed, S., Hou, S., Hooke, R., Kreutz, K., Introne, D., Handley, M., Maasch, K., Qin, D. and Ren, J.: Reduction in northward incursions of the South Asian monsoon since ∼1400 AD inferred from a Mt. Everest ice core, Geophysical Research Letters, 34(16), doi:10.1029/2007gl030440, 2007.			https://www.ncdc.noaa.gov/paleo/study/6180	28.03	86.96	6518	East Rongbuk Glacier	997.5	1997.5	d2H	permil	glacier ice	glacier ice		precipitation	Tian, L., V. Masson-Delmotte, M. Stievenard, T. Yao and J. Jouzel.2001. Tibetan Plateau summer monsoon northward extent revealed by measurements of water stable isotopes.J. Geophys. Res., 106(D22), 28,081?28,088.	positive	P_isotope	annual	TRUE	http://lipdverse.org/iso2k/1_0_0/IC07KARB.html	TO
IC08DILO01A	IC08DILO	IC08DILO01A	GlacierIce	10.1029/2008JD010076	Divine, D. V., Isaksson, E., Pohjola, V., Meijer, H., van de Wal, R. S. W., Martma, T., Moore, J., Sjoegren, B. and Godtliebsen, F.: Deuterium excess record from a small Arctic ice cap, Journal of Geophysical Research, 113(D19), doi:10.1029/2008jd010076, 2008.			this compilation	78.86	17.42	1250	Lomonosovfonna	777	1997	deuteriumExcess	permil	glacier ice	glacier ice		precipitation	Dansgaard W. 1964. Stable isotopes in precipitation. Tellus 16: 436a€“468.	positive	P_isotope	annual	TRUE	http://lipdverse.org/iso2k/1_0_0/IC08DILO.html	DVD
IC08HODF02A	IC08HODF	IC08HODF02A	GlacierIce	10.1038/nature01525, 10.1038/nature06015, 10.1016/j.polar.2011.08.001, 10.5194/tcd-8-769-2014	Watanabe, O., Jouzel, J., Johnsen, S., Parrenin, F., Shoji, H. and Yoshida, N.: Homogeneous climate variability across East Antarctica over the past three glacial cycles, Nature, 422(6931), 509–512, doi:10.1038/nature01525, 2003.	10.1016/j.polar.2011.08.001	Igarashi, M., Nakai, Y., Motizuki, Y., Takahashi, K., Motoyama, H. and Makishima, K.: Dating of the Dome Fuji shallow ice core based on a record of volcanic eruptions from AD 1260 to AD 2001, Polar Science, 5(4), 411–420, doi:10.1016/j.polar.2011.08.001, 2011.	https://www.ncdc.noaa.gov/paleo-search/study/13121	-77.32	39.7	3810	Dome F 2001	695	1875	d18O	permil	glacier ice	glacier ice		precipitation	spatial slope (Jouzel et al., 2003,Magnitude of isotope/temperature scaling for interpretation of central Antarctic ice cores https://doi.org/10.1029/2002JD002677)	positive	P_isotope	annual	TRUE	http://lipdverse.org/iso2k/1_0_0/IC08HODF.html	AO (01/16/2019)
IC08THGZ01A	IC08THGZ	IC08THGZ01A	GlacierIce	10.1029/2009GL040104	Thomas, E. R., Dennis, P. F., Bracegirdle, T. J. and Franzke, C.: Ice core evidence for significant 100-year regional warming on the Antarctic Peninsula, Geophysical Research Letters, 36(20), doi:10.1029/2009gl040104, 2009.	10.1029/2007GL032529	Thomas, E. R., Marshall, G. J. and McConnell, J. R.: A doubling in snow accumulation in the western Antarctic Peninsula since 1850, Geophysical Research Letters, 35(1), doi:10.1029/2007gl032529, 2008.	https://www.ncdc.noaa.gov/paleo/study/12543	-73.59	-70.36	1400	Gomez	1857	2006	d18O	permil	glacier ice	glacier ice		precipitation	We are using a temporal gradient of 0.5 A± 0.1 a€° per A°C to convert I´18O to temperature, based on the calibration between the I´18O with site temperatures from the European Centre for Medium Range Weather Forecasts (ECMWF) (1980a€“2005)	positive	P_isotope	annual	TRUE	http://lipdverse.org/iso2k/1_0_0/IC08THGZ.html	AO (01/16/2019)
IC08VI7901A	IC08VI79	IC08VI7901A	GlacierIce	10.1029/2007JD009143	Vinther, B. M., Clausen, H. B., Fisher, D. A., Koerner, R. M., Johnsen, S. J., Andersen, K. K., Dahl-Jensen, D., Rasmussen, S. O., Steffensen, J. P. and Svensson, A. M.: Synchronizing ice cores from the Renland and Agassiz ice caps to the Greenland Ice Core Chronology, Journal of Geophysical Research, 113(D8), doi:10.1029/2007jd009143, 2008.			https://www.ncdc.noaa.gov/paleo/study/11131	80.7	-73.1	1700	Agassiz A79	-9700	1940	d18O	permil	glacier ice	glacier ice		precipitation	Dansgaard W. 1964. Stable isotopes in precipitation. Tellus 16: 436?468.	positive	P_isotope	annual	TRUE	http://lipdverse.org/iso2k/1_0_0/IC08VI79.html	DVD
IC08VI8401A	IC08VI84	IC08VI8401A	GlacierIce	10.1029/2007JD009143	Vinther, B. M., Clausen, H. B., Fisher, D. A., Koerner, R. M., Johnsen, S. J., Andersen, K. K., Dahl-Jensen, D., Rasmussen, S. O., Steffensen, J. P. and Svensson, A. M.: Synchronizing ice cores from the Renland and Agassiz ice caps to the Greenland Ice Core Chronology, Journal of Geophysical Research, 113(D8), doi:10.1029/2007jd009143, 2008.			https://www.ncdc.noaa.gov/paleo/study/11131	80.7	-73.1	1730	Agassiz A84	-9700	1940	d18O	permil	glacier ice	glacier ice		precipitation	Dansgaard W. 1964. Stable isotopes in precipitation. Tellus 16: 436?468.	positive	P_isotope	annual	TRUE	http://lipdverse.org/iso2k/1_0_0/IC08VI84.html	DVD
IC08VI8701A	IC08VI87	IC08VI8701A	GlacierIce	10.1029/2007JD009143	Vinther, B. M., Clausen, H. B., Fisher, D. A., Koerner, R. M., Johnsen, S. J., Andersen, K. K., Dahl-Jensen, D., Rasmussen, S. O., Steffensen, J. P. and Svensson, A. M.: Synchronizing ice cores from the Renland and Agassiz ice caps to the Greenland Ice Core Chronology, Journal of Geophysical Research, 113(D8), doi:10.1029/2007jd009143, 2008.			https://www.ncdc.noaa.gov/paleo/study/11131	80.7	-73.1	1730	Agassiz A87	-9700	1940	d18O	permil	glacier ice	glacier ice		precipitation	Dansgaard W. 1964. Stable isotopes in precipitation. Tellus 16: 436?468.	positive	P_isotope	annual	TRUE	http://lipdverse.org/iso2k/1_0_0/IC08VI87.html	DVD
IC08VIRE01A	IC08VIRE	IC08VIRE01A	GlacierIce	10.1029/2007JD009143	Vinther, B. M., Clausen, H. B., Fisher, D. A., Koerner, R. M., Johnsen, S. J., Andersen, K. K., Dahl-Jensen, D., Rasmussen, S. O., Steffensen, J. P. and Svensson, A. M.: Synchronizing ice cores from the Renland and Agassiz ice caps to the Greenland Ice Core Chronology, Journal of Geophysical Research, 113(D8), doi:10.1029/2007jd009143, 2008.			https://www.ncdc.noaa.gov/paleo/study/11131	71.27	-26.73	2350	Renland	-57440	1960	d18O	permil	glacier ice	glacier ice		precipitation	Dansgaard W. 1964. Stable isotopes in precipitation. Tellus 16: 436?468.	positive	P_isotope	annual	TRUE	http://lipdverse.org/iso2k/1_0_0/IC08VIRE.html	DVD
IC08VISV01A	IC08VISV	IC08VISV01A	GlacierIce	10.1029/2007JD009502	Vimeux, F., de Angelis, M., Ginot, P., Magand, O., Casassa, G., Pouyaud, B., Falourd, S. and Johnsen, S.: A promising location in Patagonia for paleoclimate and paleoenvironmental reconstructions revealed by a shallow firn core from Monte San Valentin (Northern Patagonia Icefield, Chile), Journal of Geophysical Research, 113(D16), doi:10.1029/2007jd009502, 2008.			this compilation	-46.58	-73.32	3747	San Valentin	1964.88	2005.31	d18O	permil	glacier ice	glacier ice		precipitation		positive	P_isotope	annual	TRUE	http://lipdverse.org/iso2k/1_0_0/IC08VISV.html	TO
IC09EIBE01A	IC09EIBE	IC09EIBE01A	GlacierIce	10.1029/2008GL035930	Eichler, A., Olivier, S., Henderson, K., Laube, A., Beer, J., Papina, T., Gaeggeler, H. W. and Schwikowski, M.: Temperature response in the Altai region lags solar forcing, Geophysical Research Letters, 36(1), doi:10.1029/2008gl035930, 2009.			https://www.ncdc.noaa.gov/paleo/study/12885	49.8067	86.56	4062	Belukha glacier	1255	1975	d18O	permil	glacier ice	glacier ice		precipitation	AraguaA´s-AraguaA´s, L., and K. FrA¶hlich (1998), Stable isotope composition of precipitation over southeast Asia, J. Geophys. Res., 103, 28,721a€“28,742.	positive	P_isotope	annual	TRUE	http://lipdverse.org/iso2k/1_0_0/IC09EIBE.html	TO
IC09KA7901A	IC09KA79	IC09KA7901A	GlacierIce	10.1177/095968369500500103	Fisher, D. A., Koerner, R. M. and Reeh, N.: Holocene climatic records from Agassiz Ice Cap, Ellesmere Island, NWT, Canada, The Holocene, 5(1), 19–24, doi:10.1177/095968369500500103, 1995.	10.1126/science.1173983	Kaufman, D. S., Schneider, D. P., McKay, N. P., Ammann, C. M., Bradley, R. S., Briffa, K. R., Miller, G. H., Otto-Bliesner, B. L., Overpeck, J. T., Vinther, B. M., Abbott, M., Axford, Y., Bird, B., Birks, H. J. B., Bjune, A. E., Briner, J., Cook, T., Chipman, M., Francus, P., Gajewski, K., Geirsdottir, A., Hu, F. S., Kutchko, B., Lamoureux, S., Loso, M., MacDonald, G., Peros, M., Porinchu, D., Sc…	https://www.ncdc.noaa.gov/paleo-search/study/2431	80.7	-73.1	1700	Agassiz A79	0	1972	d18O	permil	glacier ice	glacier ice		precipitation	Dansgaard W. 1964. Stable isotopes in precipitation. Tellus 16: 436?468.	positive	P_isotope	annual	TRUE	http://lipdverse.org/iso2k/1_0_0/IC09KA79.html	AO
IC09KANG01A	IC09KANG	IC09KANG01A	GlacierIce	10.1126/science.1173983	Kaufman, D. S., Schneider, D. P., McKay, N. P., Ammann, C. M., Bradley, R. S., Briffa, K. R., Miller, G. H., Otto-Bliesner, B. L., Overpeck, J. T., Vinther, B. M., Abbott, M., Axford, Y., Bird, B., Birks, H. J. B., Bjune, A. E., Briner, J., Cook, T., Chipman, M., Francus, P., Gajewski, K., Geirsdottir, A., Hu, F. S., Kutchko, B., Lamoureux, S., Loso, M., MacDonald, G., Peros, M., Porinchu, D., Sc…			https://www.ncdc.noaa.gov/paleo/study/8700	75.1	-42.32	2917	NGRIP	0	1995	d18O	permil	glacier ice	glacier ice		precipitation	Dansgaard W. 1964. Stable isotopes in precipitation. Tellus 16: 436?468.	positive	P_isotope	annual	TRUE	http://lipdverse.org/iso2k/1_0_0/IC09KANG.html	DVD
IC09OPAN01A	IC09OPAN	IC09OPAN01A	GlacierIce	10.3189/002214309788609029	Opel, T., Fritzsche, D., Meyer, H., Schuett, R., Weiler, K., Ruth, U., Wilhelms, F. and Fischer, H.: 115 year ice-core data from Akademii Nauk ice cap, Severnaya Zemlya: high-resolution record of Eurasian Arctic climate change, Journal of Glaciology, 55(189), 21–31, doi:10.3189/002214309788609029, 2009.			https://doi.pangaea.de/10.1594/PANGAEA.871279	80.52	94.82	750	Akademii Nauk	1883	1998	d2H	permil	glacier ice	glacier ice		precipitation	Dansgaard W. 1964. Stable isotopes in precipitation. Tellus 16: 436a€“468.	positive	P_isotope	annual	TRUE	http://lipdverse.org/iso2k/1_0_0/IC09OPAN.html	DVD, TO
IC09OPAN01B	IC09OPAN	IC09OPAN01B	GlacierIce	10.3189/002214309788609029	Opel, T., Fritzsche, D., Meyer, H., Schuett, R., Weiler, K., Ruth, U., Wilhelms, F. and Fischer, H.: 115 year ice-core data from Akademii Nauk ice cap, Severnaya Zemlya: high-resolution record of Eurasian Arctic climate change, Journal of Glaciology, 55(189), 21–31, doi:10.3189/002214309788609029, 2009.			https://doi.pangaea.de/10.1594/PANGAEA.871279	80.52	94.82	750	Akademii Nauk	1883	1998	deuteriumExcess	permil	glacier ice	glacier ice		precipitation		positive	P_isotope	annual	TRUE	http://lipdverse.org/iso2k/1_0_0/IC09OPAN.html	DVD, TO
IC09VIA800A	IC09VIA8	IC09VIA800A	GlacierIce	10.1038/nature08355	Vinther, B. M., Buchardt, S. L., Clausen, H. B., Dahl-Jensen, D., Johnsen, S. J., Fisher, D. A., Koerner, R. M., Raynaud, D., Lipenkov, V., Andersen, K. K., Blunier, T., Rasmussen, S. O., Steffensen, J. P. and Svensson, A. M.: Holocene thinning of the Greenland ice sheet, Nature, 461(7262), 385–388, doi:10.1038/nature08355, 2009.			https://www.ncdc.noaa.gov/paleo/study/11148	80.7	-73.1	1700	Agassiz A84-A87	-9700	1960	d18O	permil	glacier ice	glacier ice		precipitation	Dansgaard W. 1964. Stable isotopes in precipitation. Tellus 16: 436?468.	positive	P_isotope	annual	TRUE	http://lipdverse.org/iso2k/1_0_0/IC09VIA8.html	DVD
IC09VICC01A	IC09VICC	IC09VICC01A	GlacierIce	10.1038/nature08355	Vinther, B. M., Buchardt, S. L., Clausen, H. B., Dahl-Jensen, D., Johnsen, S. J., Fisher, D. A., Koerner, R. M., Raynaud, D., Lipenkov, V., Andersen, K. K., Blunier, T., Rasmussen, S. O., Steffensen, J. P. and Svensson, A. M.: Holocene thinning of the Greenland ice sheet, Nature, 461(7262), 385–388, doi:10.1038/nature08355, 2009.			https://www.ncdc.noaa.gov/paleo/study/11148	77.17	-61.13	1885	Camp Century	1242	1967	d18O	permil	glacier ice	glacier ice		precipitation	Dansgaard W. 1964. Stable isotopes in precipitation. Tellus 16: 436a€“468.	positive	P_isotope	annual	TRUE	http://lipdverse.org/iso2k/1_0_0/IC09VICC.html	DVD
IC09VIRE01A	IC09VIRE	IC09VIRE01A	GlacierIce	10.1038/nature08355	Vinther, B. M., Buchardt, S. L., Clausen, H. B., Dahl-Jensen, D., Johnsen, S. J., Fisher, D. A., Koerner, R. M., Raynaud, D., Lipenkov, V., Andersen, K. K., Blunier, T., Rasmussen, S. O., Steffensen, J. P. and Svensson, A. M.: Holocene thinning of the Greenland ice sheet, Nature, 461(7262), 385–388, doi:10.1038/nature08355, 2009.			https://www.ncdc.noaa.gov/paleo/study/11148	71.27	-26.73	2350	Renland	3	1983	d18O	permil	glacier ice	glacier ice		precipitation	Dansgaard W. 1964. Stable isotopes in precipitation. Tellus 16: 436a€“468.	positive	P_isotope	annual	TRUE	http://lipdverse.org/iso2k/1_0_0/IC09VIRE.html	DVD
IC10NAB501A	IC10NAB5	IC10NAB501A	GlacierIce	10.1029/2009JD013268	Naik, S. S., Thamban, M., Laluraj, C. M., Redkar, B. L. and Chaturvedi, A.: A century of climate variability in central Dronning Maud Land, East Antarctica, and its relation to Southern Annular Mode and El Nino-Southern Oscillation, Journal of Geophysical Research, 115(D16), doi:10.1029/2009jd013268, 2010.			https://www.ncdc.noaa.gov/paleo/study/22602	-71.34	11.59	1300	IND 25B5 Coastal DML	1902.86	2006	d18O	permil	glacier ice	glacier ice		precipitation	spatial slope (Jouzel et al., 2003,Magnitude of isotope/temperature scaling for interpretation of central Antarctic ice cores https://doi.org/10.1029/2002JD002677)	positive	P_isotope	annual	TRUE	http://lipdverse.org/iso2k/1_0_0/IC10NAB5.html	AO (01/16/2019)
IC10VICR01A	IC10VICR	IC10VICR01A	GlacierIce	10.1016/j.quascirev.2009.11.002	Vinther, B. M., Jones, P. D., Briffa, K. R., Clausen, H. B., Andersen, K. K., Dahl-Jensen, D. and Johnsen, S. J.: Climatic signals in multiple highly resolved stable isotope records from Greenland, Quaternary Science Reviews, 29(3-4), 522–538, doi:10.1016/j.quascirev.2009.11.002, 2010.			https://doi.pangaea.de/10.1594/PANGAEA.786356	71.12	-37.32	3174	Crete	552	1973	d18O	permil	glacier ice	glacier ice		precipitation	Dansgaard W. 1964. Stable isotopes in precipitation. Tellus 16: 436a€“468.	positive	P_isotope	DJF	TRUE	http://lipdverse.org/iso2k/1_0_0/IC10VICR.html	DVD
IC10VID302A	IC10VID3	IC10VID302A	GlacierIce	10.1016/j.quascirev.2009.11.002	Vinther, B. M., Jones, P. D., Briffa, K. R., Clausen, H. B., Andersen, K. K., Dahl-Jensen, D. and Johnsen, S. J.: Climatic signals in multiple highly resolved stable isotope records from Greenland, Quaternary Science Reviews, 29(3-4), 522–538, doi:10.1016/j.quascirev.2009.11.002, 2010.			http://www.iceandclimate.nbi.ku.dk/data/Vinther_etal_2010_data_02feb2010.xls	65.18	-43.83	2480	DYE3	1778	1970	d18O	permil	glacier ice	glacier ice		precipitation	Dansgaard W. 1964. Stable isotopes in precipitation. Tellus 16: 436a€“468.	positive	P_isotope	annual	TRUE	http://lipdverse.org/iso2k/1_0_0/IC10VID3.html
IC10VIGI01B	IC10VIGI	IC10VIGI01B	GlacierIce	10.1016/j.quascirev.2009.11.002	Vinther, B. M., Jones, P. D., Briffa, K. R., Clausen, H. B., Andersen, K. K., Dahl-Jensen, D. and Johnsen, S. J.: Climatic signals in multiple highly resolved stable isotope records from Greenland, Quaternary Science Reviews, 29(3-4), 522–538, doi:10.1016/j.quascirev.2009.11.002, 2010.			http://www.iceandclimate.nbi.ku.dk/data/Vinther_etal_2010_data_02feb2010.xls	72.6	-38.5	3203	GISP2 Summer	1778	1970	d2H	permil	glacier ice	glacier ice		precipitation	Dansgaard W. 1964. Stable isotopes in precipitation. Tellus 16: 436?468.	positive	P_isotope	DJF	TRUE	http://lipdverse.org/iso2k/1_0_0/IC10VIGI.html	DVD
IC10VIGR01A	IC10VIGR	IC10VIGR01A	GlacierIce	10.1016/j.quascirev.2009.11.002	Vinther, B. M., Jones, P. D., Briffa, K. R., Clausen, H. B., Andersen, K. K., Dahl-Jensen, D. and Johnsen, S. J.: Climatic signals in multiple highly resolved stable isotope records from Greenland, Quaternary Science Reviews, 29(3-4), 522–538, doi:10.1016/j.quascirev.2009.11.002, 2010.			https://doi.pangaea.de/10.1594/PANGAEA.786354	72.58	-37.64	3200	GRIP	1	1979	d18O	permil	glacier ice	glacier ice		precipitation	Dansgaard W. 1964. Stable isotopes in precipitation. Tellus 16: 436a€“468.	positive	P_isotope	DJF	TRUE	http://lipdverse.org/iso2k/1_0_0/IC10VIGR.html	DVD
IC10VIMI01B	IC10VIMI	IC10VIMI01B	GlacierIce	10.1016/j.quascirev.2009.11.002	Vinther, B. M., Jones, P. D., Briffa, K. R., Clausen, H. B., Andersen, K. K., Dahl-Jensen, D. and Johnsen, S. J.: Climatic signals in multiple highly resolved stable isotope records from Greenland, Quaternary Science Reviews, 29(3-4), 522–538, doi:10.1016/j.quascirev.2009.11.002, 2010.			http://www.iceandclimate.nbi.ku.dk/data/Vinther_etal_2010_data_02feb2010.xls	70.3	-44.58	2451	Milcent	1778	1970	d18O	permil	glacier ice	glacier ice		precipitation	Dansgaard W. 1964. Stable isotopes in precipitation. Tellus 16: 436?468.	positive	P_isotope	DJF	TRUE	http://lipdverse.org/iso2k/1_0_0/IC10VIMI.html	DVD
IC10VIRE01B	IC10VIRE	IC10VIRE01B	GlacierIce	10.1016/j.quascirev.2009.11.002	Vinther, B. M., Jones, P. D., Briffa, K. R., Clausen, H. B., Andersen, K. K., Dahl-Jensen, D. and Johnsen, S. J.: Climatic signals in multiple highly resolved stable isotope records from Greenland, Quaternary Science Reviews, 29(3-4), 522–538, doi:10.1016/j.quascirev.2009.11.002, 2010.			http://www.iceandclimate.nbi.ku.dk/data/Vinther_etal_2010_data_02feb2010.xls	71.27	-26.73	2350	Renland	1778	1970	d18O	permil	glacier ice	glacier ice		precipitation	Dansgaard W. 1964. Stable isotopes in precipitation. Tellus 16: 436?468.	positive	P_isotope	DJF	TRUE	http://lipdverse.org/iso2k/1_0_0/IC10VIRE.html	DVD
IC10VISA01B	IC10VISA	IC10VISA01B	GlacierIce	10.1016/j.quascirev.2009.11.002	Vinther, B. M., Jones, P. D., Briffa, K. R., Clausen, H. B., Andersen, K. K., Dahl-Jensen, D. and Johnsen, S. J.: Climatic signals in multiple highly resolved stable isotope records from Greenland, Quaternary Science Reviews, 29(3-4), 522–538, doi:10.1016/j.quascirev.2009.11.002, 2010.			http://www.iceandclimate.nbi.ku.dk/data/Vinther_etal_2010_data_02feb2010.xls	70.63	-35.82	3092	Site A	1778	1970	d18O	permil	glacier ice	glacier ice		precipitation	Dansgaard W. 1964. Stable isotopes in precipitation. Tellus 16: 436a€“468.	positive	P_isotope	DJF	TRUE	http://lipdverse.org/iso2k/1_0_0/IC10VISA.html	DVD
IC10VISD01B	IC10VISD	IC10VISD01B	GlacierIce	10.1016/j.quascirev.2009.11.002	Vinther, B. M., Jones, P. D., Briffa, K. R., Clausen, H. B., Andersen, K. K., Dahl-Jensen, D. and Johnsen, S. J.: Climatic signals in multiple highly resolved stable isotope records from Greenland, Quaternary Science Reviews, 29(3-4), 522–538, doi:10.1016/j.quascirev.2009.11.002, 2010.			http://www.iceandclimate.nbi.ku.dk/data/Vinther_etal_2010_data_02feb2010.xls	70.64	-39.62	3018	Site D	1778	1970	d18O	permil	glacier ice	glacier ice		precipitation	Dansgaard W. 1964. Stable isotopes in precipitation. Tellus 16: 436?468.	positive	P_isotope	DJF	TRUE	http://lipdverse.org/iso2k/1_0_0/IC10VISD.html	DVD
IC10VISE01B	IC10VISE	IC10VISE01B	GlacierIce	10.1016/j.quascirev.2009.11.002	Vinther, B. M., Jones, P. D., Briffa, K. R., Clausen, H. B., Andersen, K. K., Dahl-Jensen, D. and Johnsen, S. J.: Climatic signals in multiple highly resolved stable isotope records from Greenland, Quaternary Science Reviews, 29(3-4), 522–538, doi:10.1016/j.quascirev.2009.11.002, 2010.			http://www.iceandclimate.nbi.ku.dk/data/Vinther_etal_2010_data_02feb2010.xls	71.76	-35.85	3087	Site G	1778	1970	d18O	permil	glacier ice	glacier ice		precipitation	Dansgaard W. 1964. Stable isotopes in precipitation. Tellus 16: 436?468.	positive	P_isotope	DJF	TRUE	http://lipdverse.org/iso2k/1_0_0/IC10VISE.html	DVD
IC10VISG01B	IC10VISG	IC10VISG01B	GlacierIce	10.1016/j.quascirev.2009.11.002	Vinther, B. M., Jones, P. D., Briffa, K. R., Clausen, H. B., Andersen, K. K., Dahl-Jensen, D. and Johnsen, S. J.: Climatic signals in multiple highly resolved stable isotope records from Greenland, Quaternary Science Reviews, 29(3-4), 522–538, doi:10.1016/j.quascirev.2009.11.002, 2010.			http://www.iceandclimate.nbi.ku.dk/data/Vinther_etal_2010_data_02feb2010.xls	71.15	-35.84	3098	Site E	1778	1970	d18O	permil	glacier ice	glacier ice		precipitation	Dansgaard W. 1964. Stable isotopes in precipitation. Tellus 16: 436?468.	positive	P_isotope	DJF	TRUE	http://lipdverse.org/iso2k/1_0_0/IC10VISG.html	DVD
IC11BEVL01A	IC11BEVL	IC11BEVL01A	GlacierIce	10.1016/j.epsl.2011.05.021	Bertler, N. A. N., Mayewski, P. A. and Carter, L.: Cold conditions in Antarctica during the Little Ice Age — Implications for abrupt climate change mechanisms, Earth and Planetary Science Letters, 308(1-2), 41–51, doi:10.1016/j.epsl.2011.05.021, 2011.			https://doi.pangaea.de/10.1594/PANGAEA.866368	-77.33	162.53	626	VLG	1140	2000	d2H	permil	glacier ice	glacier ice		precipitation	spatial slope from Masson-Delmotte et al., 2008 adapted to the VLG site. "we chose the most local conversion slope from Taylor Dome I´D (4.0a€° per A°C) to provide an estimate for I”T." (Bertler et al., 2011)	positive	P_isotope	annual	TRUE	http://lipdverse.org/iso2k/1_0_0/IC11BEVL.html	AO (01/16/2019)
IC11DILO01A	IC11DILO	IC11DILO01A	GlacierIce	10.3402/polar.v30i0.7379	Divine, D., Isaksson, E., Martma, T., Meijer, H. A. J., Moore, J., Pohjola, V., van de Wal, R. S. W. and Godtliebsen, F.: Thousand years of winter surface air temperature variations in Svalbard and northern Norway reconstructed from ice-core data, Polar Research, 30(1), 7379, doi:10.3402/polar.v30i0.7379, 2011.			https://www.ncdc.noaa.gov/paleo/study/22541	78.86	17.42	1250	Lomonosovfonna	769	1997	d18O	permil	glacier ice	glacier ice		precipitation	Dansgaard W. 1964. Stable isotopes in precipitation. Tellus 16: 436?468.	positive	P_isotope	annual	TRUE	http://lipdverse.org/iso2k/1_0_0/IC11DILO.html	DVD
IC11KIPW01A	IC11KIPW	IC11KIPW01A	GlacierIce	10.1038/nature10581	Kinnard, C., Zdanowicz, C. M., Fisher, D. A., Isaksson, E., de Vernal, A. and Thompson, L. G.: Reconstructed changes in Arctic sea ice over the past 1,450 years, Nature, 479(7374), 509–512, doi:10.1038/nature10581, 2011.			https://www.ncdc.noaa.gov/paleo/study/22542	78.4	-80.4	2030	Prince-of-Wales	151	1995	d18O	permil	glacier ice	glacier ice		precipitation	Dansgaard W. 1964. Stable isotopes in precipitation. Tellus 16: 436a€“468.	positive	P_isotope	annual	TRUE	http://lipdverse.org/iso2k/1_0_0/IC11KIPW.html	DVD
IC11LAB401A	IC11LAB4	IC11LAB401A	GlacierIce	10.1177/0959683610374886	Laluraj, C. M., Thamban, M., Naik, S. S., Redkar, B. L., Chaturvedi, A. and Ravindra, R.: Nitrate records of a shallow ice core from East Antarctica: Atmospheric processes, preservation and climatic implications, The Holocene, 21(2), 351–356, doi:10.1177/0959683610374886, 2010.			https://www.ncdc.noaa.gov/paleo-search/study/22589	-70.86	11.54	703	IND 22B4 Coastal DML	1533	1994	d18O	permil	glacier ice	glacier ice		precipitation	spatial slope (Jouzel et al., 2003,Magnitude of isotope/temperature scaling for interpretation of central Antarctic ice cores https://doi.org/10.1029/2002JD002677)	positive	P_isotope	annual	TRUE	http://lipdverse.org/iso2k/1_0_0/IC11LAB4.html	AO (01/16/2019)
IC11LIMI01A	IC11LIMI	IC11LIMI01A	GlacierIce	10.1029/2010JD015191	Liu, Y., Hou, S., Hong, S., Hur, S. D., Lee, K. and Wang, Y.: High-resolution trace element records of an ice core from the eastern Tien Shan, central Asia, since 1953 AD, Journal of Geophysical Research, 116(D12), doi:10.1029/2010jd015191, 2011.			this compilation	43.05	94.32	4512	Miaoergou	1953.3	2004.67	d18O	permil	glacier ice	glacier ice		precipitation	AraguaA´s-AraguaA´s, L., and K. FrA¶hlich (1998), Stable isotope composition of precipitation over southeast Asia, J. Geophys. Res., 103, 28,721a€“28,742.	positive	P_isotope	annual	TRUE	http://lipdverse.org/iso2k/1_0_0/IC11LIMI.html	TO
IC11STTA01A	IC11STTA	IC11STTA01A	GlacierIce	10.1038/NGEO1026	Stenni, B., Buiron, D., Frezzotti, M., Albani, S., Barbante, C., Bard, E., Barnola, J. M., Baroni, M., Baumgartner, M., Bonazza, M., Capron, E., Castellano, E., Chappellaz, J., Delmonte, B., Falourd, S., Genoni, L., Iacumin, P., Jouzel, J., Kipfstuhl, S., Landais, A., Lemieux-Dudon, B., Maggi, V., Masson-Delmotte, V., Mazzola, C., Minster, B., Montagnat, M., Mulvaney, R., Narcisi, B., Oerter, H.,…	10.5194/cp-8-509-2012	Severi, M., Udisti, R., Becagli, S., Stenni, B. and Traversi, R.: Volcanic synchronisation of the EPICA-DC and TALDICE ice cores for the last 42 kyr BP, Climate of the Past, 8(2), 509–517, doi:10.5194/cp-8-509-2012, 2012.	https://www.ncdc.noaa.gov/paleo/study/22502	-72.82	159.18	2315	TALDICE -Talos Dome	4.3	1990.84	d18O	permil	glacier ice	glacier ice		precipitation	A d18O temperature gradient of about 0.6permil/A°C was calculated between the two sites. (Stenni et al., 2002)	positive	P_isotope	annual	TRUE	http://lipdverse.org/iso2k/1_0_0/IC11STTA.html	AO (01/16/2019)
IC12MUJR01A	IC12MUJR	IC12MUJR01A	GlacierIce	10.1038/nature11391, 10.1038/ngeo1787	Mulvaney, R., Abram, N. J., Hindmarsh, R. C. A., Arrowsmith, C., Fleet, L., Triest, J., Sime, L. C., Alemany, O. and Foord, S.: Recent Antarctic Peninsula warming relative to Holocene climate and ice-shelf history, Nature, 489(7414), 141–144, doi:10.1038/nature11391, 2012.	10.1038/ngeo1787	Abram, N. J., Mulvaney, R., Wolff, E. W., Triest, J., Kipfstuhl, S., Trusel, L. D., Vimeux, F., Fleet, L. and Arrowsmith, C.: Acceleration of snow melt in an Antarctic Peninsula ice core during the twentieth century, Nature Geoscience, 6(5), 404–411, doi:10.1038/ngeo1787, 2013.	https://www.ncdc.noaa.gov/paleo/study/13954	-64.2	-57.69	1542	James Ross Island	0	2007	d2H	permil	glacier ice	glacier ice		precipitation	Temperature anomalies were calculated using a I´Da€“temperature dependence of 6.4a€‰A±a€‰1.3a€°a€‰A°Caˆ’1 (Abram et al. 2011), under the assumption that the modern-day calibration holds over the entire record26, and are given with reference to ada€‰1961a€“1990.	positive	P_isotope	annual	TRUE	http://lipdverse.org/iso2k/1_0_0/IC12MUJR.html	AO (01/16/2019)
IC12RHME01A	IC12RHME	IC12RHME01A	GlacierIce	10.5194/cp-8-1223-2012	Rhodes, R. H., Bertler, N. A. N., Baker, J. A., Steen-Larsen, H. C., Sneed, S. B., Morgenstern, U. and Johnsen, S. J.: Little Ice Age climate and oceanic conditions of the Ross Sea, Antarctica from a coastal ice core record, Climate of the Past, 8(4), 1223–1238, doi:10.5194/cp-8-1223-2012, 2012.			https://www.ncdc.noaa.gov/paleo/study/13175	-77.52	167.68	1600	Mt Erebus Saddle - MES	1472.65	2006.9	d2H	permil	glacier ice	glacier ice		precipitation	We employ the Taylor Dome I´-borehole temperature calibration of 4A±1.5 a€°I´D perA°C(Steig et al., 1998).	positive	P_isotope	annual	TRUE	http://lipdverse.org/iso2k/1_0_0/IC12RHME.html	AO (01/16/2019)
IC12SIWG01A	IC12SIWG	IC12SIWG01A	GlacierIce	10.1175/JCLI-D-11-00496.1	Sinclair, K. E., Bertler, N. A. N. and van Ommen, T. D.: Twentieth-Century Surface Temperature Trends in the Western Ross Sea, Antarctica: Evidence from a High-Resolution Ice Core, Journal of Climate, 25(10), 3629–3636, doi:10.1175/jcli-d-11-00496.1, 2012.			https://doi.pangaea.de/10.1594/PANGAEA.880528	-72.9	169.08	400	Whitehall Glacier WGH	1882	2006	d2H	permil	glacier ice	glacier ice		precipitation	Using ECMWF Interim Re-Analysis (ERA-Interim) data, this study develops a precipitation-weighted I´18O-temperature transfer function of 0.62a€° A°Caˆ’1, which is comparable to other proximal ice cores, such as Taylor, Talos, and Law Domes.	positive	P_isotope	annual	TRUE	http://lipdverse.org/iso2k/1_0_0/IC12SIWG.html	AO (01/16/2019)
IC12WACD01A	IC12WACD	IC12WACD01A	GlacierIce	10.1111/j.1468-0459.2012.00461.x	Wagenbach, D., Bohleber, P. and Preunkert, S.: Cold, alpine ice bodies revisited: what may we learn from their impurity and isotope content?, Geografiska Annaler: Series A, Physical Geography, 94(2), 245–263, doi:10.1111/j.1468-0459.2012.00461.x, 2012.			https://doi.pangaea.de/10.1594/PANGAEA.880012	45.8411	6.8478	4250	Col du Dome	1940	1994	d18O	permil	glacier ice	glacier ice		precipitation	Dansgaard W. 1964. Stable isotopes in precipitation. Tellus 16: 436a€“468.	positive	P_isotope	annual	TRUE	http://lipdverse.org/iso2k/1_0_0/IC12WACD.html	TO
IC13BOCG04A	IC13BOCG	IC13BOCG04A	GlacierIce	10.3402/tellusb.v65i0.20148	Bohleber, P., Wagenbach, D., Schoener, W. and Boehm, R.: To what extent do water isotope records from low accumulation Alpine ice cores reproduce instrumental temperature series?, Tellus B: Chemical and Physical Meteorology, 65(1), 20148, doi:10.3402/tellusb.v65i0.20148, 2013.			https://doi.pangaea.de/10.1594/PANGAEA.874205	45.9297	7.877	4450	Colle Gnifetti KCI	1880	1993	d18O	permil	glacier ice	glacier ice		precipitation	Dansgaard W. 1964. Stable isotopes in precipitation. Tellus 16: 436a€“468.	positive	P_isotope	annual	TRUE	http://lipdverse.org/iso2k/1_0_0/IC13BOCG.html	TO
IC13BOCG02A	IC13BOCG	IC13BOCG02A	GlacierIce	10.3402/tellusb.v65i0.20148	Bohleber, P., Wagenbach, D., Schoener, W. and Boehm, R.: To what extent do water isotope records from low accumulation Alpine ice cores reproduce instrumental temperature series?, Tellus B: Chemical and Physical Meteorology, 65(1), 20148, doi:10.3402/tellusb.v65i0.20148, 2013.			https://doi.pangaea.de/10.1594/PANGAEA.874205	45.9297	7.877	4450	Colle Gnifetti KCI	1880	1993	d18O	permil	glacier ice	glacier ice		precipitation	Dansgaard W. 1964. Stable isotopes in precipitation. Tellus 16: 436a€“468.	positive	P_isotope	annual	TRUE	http://lipdverse.org/iso2k/1_0_0/IC13BOCG.html	TO
IC13BOCG03A	IC13BOCG	IC13BOCG03A	GlacierIce	10.3402/tellusb.v65i0.20148	Bohleber, P., Wagenbach, D., Schoener, W. and Boehm, R.: To what extent do water isotope records from low accumulation Alpine ice cores reproduce instrumental temperature series?, Tellus B: Chemical and Physical Meteorology, 65(1), 20148, doi:10.3402/tellusb.v65i0.20148, 2013.			https://doi.pangaea.de/10.1594/PANGAEA.874205	45.9297	7.877	4450	Colle Gnifetti KCI	1880	1993	d18O	permil	glacier ice	glacier ice		precipitation	Dansgaard W. 1964. Stable isotopes in precipitation. Tellus 16: 436a€“468.	positive	P_isotope	annual	TRUE	http://lipdverse.org/iso2k/1_0_0/IC13BOCG.html	TO
IC13OPAN01A	IC13OPAN	IC13OPAN01A	GlacierIce	10.5194/cp-9-2379-2013	Opel, T., Fritzsche, D. and Meyer, H.: Eurasian Arctic climate over the past millennium as recorded in the Akademii Nauk ice core (Severnaya Zemlya), Climate of the Past, 9(5), 2379–2389, doi:10.5194/cp-9-2379-2013, 2013.			https://doi.pangaea.de/10.1594/PANGAEA.824732	80.52	94.82	750	Akademii Nauk	900	1998	d18O	permil	glacier ice	glacier ice		precipitation	Dansgaard W. 1964. Stable isotopes in precipitation. Tellus 16: 436a€“468.	positive	P_isotope	annual	TRUE	http://lipdverse.org/iso2k/1_0_0/IC13OPAN.html	DVD, TO
IC13PALD01A	IC13PALD	IC13PALD01A	GlacierIce	10.3189/S0022143000002768	Morgan, V. I., Wookey, C. W., Li, J., van Ommen, T. D., Skinner, W. and Fitzpatrick, Μ. F.: Site information and initial results from deep ice drilling on Law Dome, Antarctica, Journal of Glaciology, 43(143), 3–10, doi:10.3189/s0022143000002768, 1997.	10.1177/095968369700700312	Morgan, V. and van Ommen, T. D.: Seasonality in late-Holocene climate from ice-core records, The Holocene, 7(3), 351–354, doi:10.1177/095968369700700312, 1997.	https://www.ncdc.noaa.gov/paleo-search/study/22589	-66.77	112.81	1370	DSS Law Dome	173	1995	d18O	permil	glacier ice	glacier ice		precipitation	Van Ommen et al., 1997 : seasonal cycle calibration. This comparison yields an isotopea€temperature relation with a gradient (dI´/dT) of 0.44A±0.02a€°/A°C	positive	P_isotope	annual	TRUE	http://lipdverse.org/iso2k/1_0_0/IC13PALD.html	AO (01/16/2019)
IC13ST0101A	IC13ST01	IC13ST0101A	GlacierIce	10.1038/ngeo1778	Steig, E. J., Ding, Q., White, J. W. C., Kuettel, M., Rupper, S. B., Neumann, T. A., Neff, P. D., Gallant, A. J. E., Mayewski, P. A., Taylor, K. C., Hoffmann, G., Dixon, D. A., Schoenemann, S. W., Markle, B. R., Fudge, T. J., Schneider, D. P., Schauer, A. J., Teel, R. P., Vaughn, B. H., Burgener, L., Williams, J. and Korotkikh, E.: Recent climate and ice-sheet changes in West Antarctica compared …	10.1007/s00382-012-1460-7	Kuettel, M., Steig, E. J., Ding, Q., Monaghan, A. J. and Battisti, D. S.: Seasonal climate information preserved in West Antarctic ice core water isotopes: relationships to temperature, large-scale circulation, and sea ice, Climate Dynamics, 39(7-8), 1841–1857, doi:10.1007/s00382-012-1460-7, 2012.	https://www.ncdc.noaa.gov/paleo/study/22519	-79.38	-111.24	1791	US-ITASE-2000-1	1673.29	2000.99	d18O	permil	glacier ice	glacier ice		precipitation	Steig et al. 2013 suppl: Scaling between I´18O and temperature in West Antarctica can be estimated in a number of ways, all yielding similar results. The local interannual scaling between WAIS Divide I´18O and Byrd temperature is 0.5a€°/A°C; the ratio of 50-year trends also yields 0.5a€°/A°C (1957-2006, Byrd temperature trend7 = 0.48A°C/decade; WAIS Divide I´18O trend = 0.24a€°/decade). Regional …	positive	P_isotope	annual	TRUE	http://lipdverse.org/iso2k/1_0_0/IC13ST01.html	AO (01/16/2019)
IC13ST0301A	IC13ST03	IC13ST0301A	GlacierIce	10.1038/ngeo1778	Steig, E. J., Ding, Q., White, J. W. C., Kuettel, M., Rupper, S. B., Neumann, T. A., Neff, P. D., Gallant, A. J. E., Mayewski, P. A., Taylor, K. C., Hoffmann, G., Dixon, D. A., Schoenemann, S. W., Markle, B. R., Fudge, T. J., Schneider, D. P., Schauer, A. J., Teel, R. P., Vaughn, B. H., Burgener, L., Williams, J. and Korotkikh, E.: Recent climate and ice-sheet changes in West Antarctica compared …			https://www.ncdc.noaa.gov/paleo/study/22519	-78.43	-111.92	1742	US-ITASE-2000-3	1971.21	2000.99	d2H	permil	glacier ice	glacier ice		precipitation	Steig et al. 2013 suppl: Scaling between I´18O and temperature in West Antarctica can be estimated in a number of ways, all yielding similar results. The local interannual scaling between WAIS Divide I´18O and Byrd temperature is 0.5a€°/A°C; the ratio of 50-year trends also yields 0.5a€°/A°C (1957-2006, Byrd temperature trend7 = 0.48A°C/decade; WAIS Divide I´18O trend = 0.24a€°/decade). Regional …	positive	P_isotope	annual	TRUE	http://lipdverse.org/iso2k/1_0_0/IC13ST03.html	AO (01/16/2019)
IC13ST0401A	IC13ST04	IC13ST0401A	GlacierIce	10.1038/ngeo1778	Steig, E. J., Ding, Q., White, J. W. C., Kuettel, M., Rupper, S. B., Neumann, T. A., Neff, P. D., Gallant, A. J. E., Mayewski, P. A., Taylor, K. C., Hoffmann, G., Dixon, D. A., Schoenemann, S. W., Markle, B. R., Fudge, T. J., Schneider, D. P., Schauer, A. J., Teel, R. P., Vaughn, B. H., Burgener, L., Williams, J. and Korotkikh, E.: Recent climate and ice-sheet changes in West Antarctica compared …	10.1007/s00382-012-1460-7	Kuettel, M., Steig, E. J., Ding, Q., Monaghan, A. J. and Battisti, D. S.: Seasonal climate information preserved in West Antarctic ice core water isotopes: relationships to temperature, large-scale circulation, and sea ice, Climate Dynamics, 39(7-8), 1841–1857, doi:10.1007/s00382-012-1460-7, 2012.	https://www.ncdc.noaa.gov/paleo/study/22519	-78.08	-120.08	1697	US-ITASE-2000-4	1798.46	1999.74	d18O	permil	glacier ice	glacier ice		precipitation	Steig et al. 2013 suppl: Scaling between I´18O and temperature in West Antarctica can be estimated in a number of ways, all yielding similar results. The local interannual scaling between WAIS Divide I´18O and Byrd temperature is 0.5a€°/A°C; the ratio of 50-year trends also yields 0.5a€°/A°C (1957-2006, Byrd temperature trend7 = 0.48A°C/decade; WAIS Divide I´18O trend = 0.24a€°/decade). Regional …	positive	P_isotope	annual	TRUE	http://lipdverse.org/iso2k/1_0_0/IC13ST04.html	AO (01/16/2019)
IC13ST0501A	IC13ST05	IC13ST0501A	GlacierIce	10.1038/ngeo1778	Steig, E. J., Ding, Q., White, J. W. C., Kuettel, M., Rupper, S. B., Neumann, T. A., Neff, P. D., Gallant, A. J. E., Mayewski, P. A., Taylor, K. C., Hoffmann, G., Dixon, D. A., Schoenemann, S. W., Markle, B. R., Fudge, T. J., Schneider, D. P., Schauer, A. J., Teel, R. P., Vaughn, B. H., Burgener, L., Williams, J. and Korotkikh, E.: Recent climate and ice-sheet changes in West Antarctica compared …	10.1007/s00382-012-1460-7	Kuettel, M., Steig, E. J., Ding, Q., Monaghan, A. J. and Battisti, D. S.: Seasonal climate information preserved in West Antarctic ice core water isotopes: relationships to temperature, large-scale circulation, and sea ice, Climate Dynamics, 39(7-8), 1841–1857, doi:10.1007/s00382-012-1460-7, 2012.	https://www.ncdc.noaa.gov/paleo/study/22519	-77.68	-124	1828	US-ITASE-2000-5	1718.32	1998.85	d18O	permil	glacier ice	glacier ice		precipitation	Steig et al. 2013 suppl: Scaling between I´18O and temperature in West Antarctica can be estimated in a number of ways, all yielding similar results. The local interannual scaling between WAIS Divide I´18O and Byrd temperature is 0.5a€°/A°C; the ratio of 50-year trends also yields 0.5a€°/A°C (1957-2006, Byrd temperature trend7 = 0.48A°C/decade; WAIS Divide I´18O trend = 0.24a€°/decade). Regional …	positive	P_isotope	annual	TRUE	http://lipdverse.org/iso2k/1_0_0/IC13ST05.html	AO (01/16/2019)
IC13ST0601A	IC13ST06	IC13ST0601A	GlacierIce	10.1038/ngeo1778	Steig, E. J., Ding, Q., White, J. W. C., Kuettel, M., Rupper, S. B., Neumann, T. A., Neff, P. D., Gallant, A. J. E., Mayewski, P. A., Taylor, K. C., Hoffmann, G., Dixon, D. A., Schoenemann, S. W., Markle, B. R., Fudge, T. J., Schneider, D. P., Schauer, A. J., Teel, R. P., Vaughn, B. H., Burgener, L., Williams, J. and Korotkikh, E.: Recent climate and ice-sheet changes in West Antarctica compared …			https://www.ncdc.noaa.gov/paleo/study/22519	-78.33	-124.48	1639	US-ITASE-2000-6	1964.75	1997.77	d18O	permil	glacier ice	glacier ice		precipitation	Steig et al. 2013 suppl: Scaling between I´18O and temperature in West Antarctica can be estimated in a number of ways, all yielding similar results. The local interannual scaling between WAIS Divide I´18O and Byrd temperature is 0.5a€°/A°C; the ratio of 50-year trends also yields 0.5a€°/A°C (1957-2006, Byrd temperature trend7 = 0.48A°C/decade; WAIS Divide I´18O trend = 0.24a€°/decade). Regional …	positive	P_isotope	annual	TRUE	http://lipdverse.org/iso2k/1_0_0/IC13ST06.html	AO (01/16/2019)
IC13ST1201A	IC13ST12	IC13ST1201A	GlacierIce	10.1038/ngeo1778	Steig, E. J., Ding, Q., White, J. W. C., Kuettel, M., Rupper, S. B., Neumann, T. A., Neff, P. D., Gallant, A. J. E., Mayewski, P. A., Taylor, K. C., Hoffmann, G., Dixon, D. A., Schoenemann, S. W., Markle, B. R., Fudge, T. J., Schneider, D. P., Schauer, A. J., Teel, R. P., Vaughn, B. H., Burgener, L., Williams, J. and Korotkikh, E.: Recent climate and ice-sheet changes in West Antarctica compared …	10.1007/s00382-012-1460-7	Kuettel, M., Steig, E. J., Ding, Q., Monaghan, A. J. and Battisti, D. S.: Seasonal climate information preserved in West Antarctic ice core water isotopes: relationships to temperature, large-scale circulation, and sea ice, Climate Dynamics, 39(7-8), 1841–1857, doi:10.1007/s00382-012-1460-7, 2012.	https://www.ncdc.noaa.gov/paleo/study/22519	-82	-110.01	1746	US-ITASE-2001-2	1891.63	2001.97	d18O	permil	glacier ice	glacier ice		precipitation	Steig et al. 2013 suppl: Scaling between I´18O and temperature in West Antarctica can be estimated in a number of ways, all yielding similar results. The local interannual scaling between WAIS Divide I´18O and Byrd temperature is 0.5a€°/A°C; the ratio of 50-year trends also yields 0.5a€°/A°C (1957-2006, Byrd temperature trend7 = 0.48A°C/decade; WAIS Divide I´18O trend = 0.24a€°/decade). Regional …	positive	P_isotope	annual	TRUE	http://lipdverse.org/iso2k/1_0_0/IC13ST12.html	AO (01/16/2019)
IC13ST1301A	IC13ST13	IC13ST1301A	GlacierIce	10.1038/ngeo1778	Steig, E. J., Ding, Q., White, J. W. C., Kuettel, M., Rupper, S. B., Neumann, T. A., Neff, P. D., Gallant, A. J. E., Mayewski, P. A., Taylor, K. C., Hoffmann, G., Dixon, D. A., Schoenemann, S. W., Markle, B. R., Fudge, T. J., Schneider, D. P., Schauer, A. J., Teel, R. P., Vaughn, B. H., Burgener, L., Williams, J. and Korotkikh, E.: Recent climate and ice-sheet changes in West Antarctica compared …	10.1007/s00382-012-1460-7	Kuettel, M., Steig, E. J., Ding, Q., Monaghan, A. J. and Battisti, D. S.: Seasonal climate information preserved in West Antarctic ice core water isotopes: relationships to temperature, large-scale circulation, and sea ice, Climate Dynamics, 39(7-8), 1841–1857, doi:10.1007/s00382-012-1460-7, 2012.	https://www.ncdc.noaa.gov/paleo/study/22519	-78.12	-95.65	1620	US-ITASE-2001-3	1858.17	2001.98	d2H	permil	glacier ice	glacier ice		precipitation	Steig et al. 2013 suppl: Scaling between I´18O and temperature in West Antarctica can be estimated in a number of ways, all yielding similar results. The local interannual scaling between WAIS Divide I´18O and Byrd temperature is 0.5a€°/A°C; the ratio of 50-year trends also yields 0.5a€°/A°C (1957-2006, Byrd temperature trend7 = 0.48A°C/decade; WAIS Divide I´18O trend = 0.24a€°/decade). Regional …	positive	P_isotope	annual	TRUE	http://lipdverse.org/iso2k/1_0_0/IC13ST13.html	AO (01/16/2019)
IC13ST1501A	IC13ST15	IC13ST1501A	GlacierIce	10.1038/ngeo1778	Steig, E. J., Ding, Q., White, J. W. C., Kuettel, M., Rupper, S. B., Neumann, T. A., Neff, P. D., Gallant, A. J. E., Mayewski, P. A., Taylor, K. C., Hoffmann, G., Dixon, D. A., Schoenemann, S. W., Markle, B. R., Fudge, T. J., Schneider, D. P., Schauer, A. J., Teel, R. P., Vaughn, B. H., Burgener, L., Williams, J. and Korotkikh, E.: Recent climate and ice-sheet changes in West Antarctica compared …	10.1007/s00382-012-1460-7	Kuettel, M., Steig, E. J., Ding, Q., Monaghan, A. J. and Battisti, D. S.: Seasonal climate information preserved in West Antarctic ice core water isotopes: relationships to temperature, large-scale circulation, and sea ice, Climate Dynamics, 39(7-8), 1841–1857, doi:10.1007/s00382-012-1460-7, 2012.	https://www.ncdc.noaa.gov/paleo/study/22519	-77.06	-89.14	1239	US-ITASE-2001-5	1779.57	2001.98	d18O	permil	glacier ice	glacier ice		precipitation	Steig et al. 2013 suppl: Scaling between I´18O and temperature in West Antarctica can be estimated in a number of ways, all yielding similar results. The local interannual scaling between WAIS Divide I´18O and Byrd temperature is 0.5a€°/A°C; the ratio of 50-year trends also yields 0.5a€°/A°C (1957-2006, Byrd temperature trend7 = 0.48A°C/decade; WAIS Divide I´18O trend = 0.24a€°/decade). Regional …	positive	P_isotope	annual	TRUE	http://lipdverse.org/iso2k/1_0_0/IC13ST15.html	AO (01/16/2019)
IC13ST2101A	IC13ST21	IC13ST2101A	GlacierIce	10.1038/ngeo1778	Steig, E. J., Ding, Q., White, J. W. C., Kuettel, M., Rupper, S. B., Neumann, T. A., Neff, P. D., Gallant, A. J. E., Mayewski, P. A., Taylor, K. C., Hoffmann, G., Dixon, D. A., Schoenemann, S. W., Markle, B. R., Fudge, T. J., Schneider, D. P., Schauer, A. J., Teel, R. P., Vaughn, B. H., Burgener, L., Williams, J. and Korotkikh, E.: Recent climate and ice-sheet changes in West Antarctica compared …	10.1007/s00382-012-1460-7	Kuettel, M., Steig, E. J., Ding, Q., Monaghan, A. J. and Battisti, D. S.: Seasonal climate information preserved in West Antarctic ice core water isotopes: relationships to temperature, large-scale circulation, and sea ice, Climate Dynamics, 39(7-8), 1841–1857, doi:10.1007/s00382-012-1460-7, 2012.	https://www.ncdc.noaa.gov/paleo/study/22519	-82	-110.01	1957	US-ITASE-2002-1	1854.87	2002.97	d18O	permil	glacier ice	glacier ice		precipitation	Steig et al. 2013 suppl: Scaling between I´18O and temperature in West Antarctica can be estimated in a number of ways, all yielding similar results. The local interannual scaling between WAIS Divide I´18O and Byrd temperature is 0.5a€°/A°C; the ratio of 50-year trends also yields 0.5a€°/A°C (1957-2006, Byrd temperature trend7 = 0.48A°C/decade; WAIS Divide I´18O trend = 0.24a€°/decade). Regional …	positive	P_isotope	annual	TRUE	http://lipdverse.org/iso2k/1_0_0/IC13ST21.html	AO (01/16/2019)
IC13ST2201A	IC13ST22	IC13ST2201A	GlacierIce	10.1038/ngeo1778	Steig, E. J., Ding, Q., White, J. W. C., Kuettel, M., Rupper, S. B., Neumann, T. A., Neff, P. D., Gallant, A. J. E., Mayewski, P. A., Taylor, K. C., Hoffmann, G., Dixon, D. A., Schoenemann, S. W., Markle, B. R., Fudge, T. J., Schneider, D. P., Schauer, A. J., Teel, R. P., Vaughn, B. H., Burgener, L., Williams, J. and Korotkikh, E.: Recent climate and ice-sheet changes in West Antarctica compared …			https://www.ncdc.noaa.gov/paleo/study/22519	-83.5	-104.99	1957	US-ITASE-2002-2	1894.19	2001.92	d18O	permil	glacier ice	glacier ice		precipitation	Steig et al. 2013 suppl: Scaling between I´18O and temperature in West Antarctica can be estimated in a number of ways, all yielding similar results. The local interannual scaling between WAIS Divide I´18O and Byrd temperature is 0.5a€°/A°C; the ratio of 50-year trends also yields 0.5a€°/A°C (1957-2006, Byrd temperature trend7 = 0.48A°C/decade; WAIS Divide I´18O trend = 0.24a€°/decade). Regional …	positive	P_isotope	annual	TRUE	http://lipdverse.org/iso2k/1_0_0/IC13ST22.html	AO (01/16/2019)
IC13ST2401A	IC13ST24	IC13ST2401A	GlacierIce	10.1038/ngeo1778	Steig, E. J., Ding, Q., White, J. W. C., Kuettel, M., Rupper, S. B., Neumann, T. A., Neff, P. D., Gallant, A. J. E., Mayewski, P. A., Taylor, K. C., Hoffmann, G., Dixon, D. A., Schoenemann, S. W., Markle, B. R., Fudge, T. J., Schneider, D. P., Schauer, A. J., Teel, R. P., Vaughn, B. H., Burgener, L., Williams, J. and Korotkikh, E.: Recent climate and ice-sheet changes in West Antarctica compared …	10.1007/s00382-012-1460-7	Kuettel, M., Steig, E. J., Ding, Q., Monaghan, A. J. and Battisti, D. S.: Seasonal climate information preserved in West Antarctic ice core water isotopes: relationships to temperature, large-scale circulation, and sea ice, Climate Dynamics, 39(7-8), 1841–1857, doi:10.1007/s00382-012-1460-7, 2012.	https://www.ncdc.noaa.gov/paleo/study/22520	-86.5	-107.99	2586	US-ITASE-2002-4	1593.51	2002.94	d18O	permil	glacier ice	glacier ice		precipitation	Steig et al. 2013 suppl: Scaling between I´18O and temperature in West Antarctica can be estimated in a number of ways, all yielding similar results. The local interannual scaling between WAIS Divide I´18O and Byrd temperature is 0.5a€°/A°C; the ratio of 50-year trends also yields 0.5a€°/A°C (1957-2006, Byrd temperature trend7 = 0.48A°C/decade; WAIS Divide I´18O trend = 0.24a€°/decade). Regional …	positive	P_isotope	annual	TRUE	http://lipdverse.org/iso2k/1_0_0/IC13ST24.html	AO (01/16/2019)
IC13ST9101A	IC13ST91	IC13ST9101A	GlacierIce	10.1038/ngeo1778	Steig, E. J., Ding, Q., White, J. W. C., Kuettel, M., Rupper, S. B., Neumann, T. A., Neff, P. D., Gallant, A. J. E., Mayewski, P. A., Taylor, K. C., Hoffmann, G., Dixon, D. A., Schoenemann, S. W., Markle, B. R., Fudge, T. J., Schneider, D. P., Schauer, A. J., Teel, R. P., Vaughn, B. H., Burgener, L., Williams, J. and Korotkikh, E.: Recent climate and ice-sheet changes in West Antarctica compared …			https://www.ncdc.noaa.gov/paleo/study/22519	-80.62	-122.63	1350	US-ITASE-1999-1	1723.55	1999.88	d18O	permil	glacier ice	glacier ice		precipitation	spatial slope (Jouzel et al., 2003,Magnitude of isotope/temperature scaling for interpretation of central Antarctic ice cores https://doi.org/10.1029/2002JD002677)	positive	P_isotope	annual	TRUE	http://lipdverse.org/iso2k/1_0_0/IC13ST91.html	AO (01/16/2019)
IC13STN701A	IC13STN7	IC13STN701A	GlacierIce	10.1038/ngeo1778	Steig, E. J., Ding, Q., White, J. W. C., Kuettel, M., Rupper, S. B., Neumann, T. A., Neff, P. D., Gallant, A. J. E., Mayewski, P. A., Taylor, K. C., Hoffmann, G., Dixon, D. A., Schoenemann, S. W., Markle, B. R., Fudge, T. J., Schneider, D. P., Schauer, A. J., Teel, R. P., Vaughn, B. H., Burgener, L., Williams, J. and Korotkikh, E.: Recent climate and ice-sheet changes in West Antarctica compared …			https://www.ncdc.noaa.gov/paleo/study/22519	-73.72	7.94	3174	NUS 07-1	1708.6	2005.4	d18O	permil	glacier ice	glacier ice		precipitation	spatial slope (Jouzel et al., 2003,Magnitude of isotope/temperature scaling for interpretation of central Antarctic ice cores https://doi.org/10.1029/2002JD002677)	positive	P_isotope	annual	TRUE	http://lipdverse.org/iso2k/1_0_0/IC13STN7.html	AO (01/16/2019)
IC13STN801A	IC13STN8	IC13STN801A	GlacierIce	10.1038/ngeo1778	Steig, E. J., Ding, Q., White, J. W. C., Kuettel, M., Rupper, S. B., Neumann, T. A., Neff, P. D., Gallant, A. J. E., Mayewski, P. A., Taylor, K. C., Hoffmann, G., Dixon, D. A., Schoenemann, S. W., Markle, B. R., Fudge, T. J., Schneider, D. P., Schauer, A. J., Teel, R. P., Vaughn, B. H., Burgener, L., Williams, J. and Korotkikh, E.: Recent climate and ice-sheet changes in West Antarctica compared …			https://www.ncdc.noaa.gov/paleo/study/22519	-74.88	1.6	2907	NUS 08-7	1382.74	2008.57	d18O	permil	glacier ice	glacier ice		precipitation	spatial slope (Jouzel et al., 2003,Magnitude of isotope/temperature scaling for interpretation of central Antarctic ice cores https://doi.org/10.1029/2002JD002677)	positive	P_isotope	annual	TRUE	http://lipdverse.org/iso2k/1_0_0/IC13STN8.html	AO (01/16/2019)
IC13STSP01A	IC13STSP	IC13STSP01A	GlacierIce	10.1038/ngeo1778	Steig, E. J., Ding, Q., White, J. W. C., Kuettel, M., Rupper, S. B., Neumann, T. A., Neff, P. D., Gallant, A. J. E., Mayewski, P. A., Taylor, K. C., Hoffmann, G., Dixon, D. A., Schoenemann, S. W., Markle, B. R., Fudge, T. J., Schneider, D. P., Schauer, A. J., Teel, R. P., Vaughn, B. H., Burgener, L., Williams, J. and Korotkikh, E.: Recent climate and ice-sheet changes in West Antarctica compared …			https://www.ncdc.noaa.gov/paleo/study/22519	-89.93	144.39	1835	SPRESSO (South Pole)	1801	1998	d2H	permil	glacier ice	glacier ice		precipitation	Dansgaard W. 1964. Stable isotopes in precipitation. Tellus 16: 436a€“468.	positive	P_isotope	annual	TRUE	http://lipdverse.org/iso2k/1_0_0/IC13STSP.html	AO
IC13THFE01A	IC13THFE	IC13THFE01A	GlacierIce	10.1002/2013GL057782	Thomas, E. R., Bracegirdle, T. J., Turner, J. and Wolff, E. W.: A 308 year record of climate variability in West Antarctica, Geophysical Research Letters, 40(20), 5492–5496, doi:10.1002/2013gl057782, 2013.			https://www.ncdc.noaa.gov/paleo/study/22477	-74.57	-86.9	1354	Ferrigno	1703	2010	d2H	permil	glacier ice	glacier ice		precipitation	The F10 record is significantly correlated (r = 0.44, P = 0.01) with ERA-Interim temperature (t850, 1979a€“2009), and we observe that the pattern of corre- lation with atmospheric pressure and sea surface tempera- tures (SSTs) is similar for both observational I´D and local temperature from reanalysis; however, we do not assume that I´D is a quantitative temperature proxy.	positive	P_isotope	annual	TRUE	http://lipdverse.org/iso2k/1_0_0/IC13THFE.html	AO (01/16/2019)
SAm_035	IC13THQU	IC13THQU01A	GlacierIce	10.1126/science.1234210	Thompson, L. G., Mosley-Thompson, E., Davis, M. E., Zagorodnov, V. S., Howat, I. M., Mikhalenko, V. N. and Lin, P.-N.: Annually Resolved Ice Core Records of Tropical Climate Variability over the Past 1800 Years, Science, 340(6135), 945–950, doi:10.1126/science.1234210, 2013.			https://www.ncdc.noaa.gov/paleo/study/14174	-13.9333	-70.8333	5670	Quelccaya Ice Cap	226	2009	d18O	permil	glacier ice	glacier ice		precipitation	There is no significant relationship between stable isotopes and precipitation (net accumulation) on the Quelccaya ice cap. In other words, the precipitation “amount effect” does not appear to govern the stable isotopic chemistry on this tropical glacier. Because 70 to 80% of the precipitation falling on Quelccaya arrives during the wet season, the δ18O history reflects primarily conditions durin…	positive	P_isotope	DJF	TRUE	http://lipdverse.org/iso2k/1_0_0/IC13THQU.html
IC14EKVK00A	IC14EKVK	IC14EKVK00A	GlacierIce	10.3189/201AoG66A189, 10.5194/cp-2016-76	Ekaykin, A. A., Kozachek, A. V., Lipenkov, V. Y. and Shibaev, Y. A.: Multiple climate shifts in the Southern Hemisphere over the past three centuries based on central Antarctic snow pits and core studies, Annals of Glaciology, 55(66), 259–266, doi:10.3189/2014aog66a189, 2014.	10.5194/cp-2016-76	Ekaykin, A. A., Vladimirova, D. O., Lipenkov, V. Y. and Masson-Delmotte, V.: Climatic variability in Princess Elizabeth Land (East Antarctica) overthe last 350 years, , doi:10.5194/cp-2016-76, 2016.	https://www.ncdc.noaa.gov/paleo/study/22532	-78.47	106.83	3488	Vostok composite VRS13 ( a stack of 15 individual isotopic records from snow pits and shallow cores recovered in the vicinity of Vostok Station)	1654	2010	d2H	permil	glacier ice	glacier ice		precipitation	Ekaykin et al., 2014. VRS13 is correlated with the local instrumentally measured near-surface air temperature data for the period1958a€“2010. Surprisingly, VRS13 is much more consistent with the temperature of the warm period of the year (Novembera€“January), with a correlation coefficient of 0.57.	positive	P_isotope	annual	TRUE	http://lipdverse.org/iso2k/1_0_0/IC14EKVK.html	AO (01/16/2019)
IC14MAFH01A	IC14MAFH	IC14MAFH01A	GlacierIce	10.5194/cp-10-1093-2014	Mariani, I., Eichler, A., Jenk, T. M., Broennimann, S., Auchmann, R., Leuenberger, M. C. and Schwikowski, M.: Temperature and precipitation signal in two Alpine ice cores over the period 1961&ndash;2001, Climate of the Past, 10(3), 1093–1108, doi:10.5194/cp-10-1093-2014, 2014.			this compilation	46.55	8.07	3900	Fiescherhorn	1960	2002	d18O	permil	glacier ice	glacier ice		precipitation	Dansgaard W. 1964. Stable isotopes in precipitation. Tellus 16: 436a€“468.	positive	P_isotope	annual	TRUE	http://lipdverse.org/iso2k/1_0_0/IC14MAFH.html	TO
IC14VL1K01A	IC14VL1K	IC14VL1K01A	GlacierIce	10.5194/cp-2016-76	Ekaykin, A. A., Vladimirova, D. O., Lipenkov, V. Y. and Masson-Delmotte, V.: Climatic variability in Princess Elizabeth Land (East Antarctica) overthe last 350 years, , doi:10.5194/cp-2016-76, 2016.			https://www.clim-past.net/13/61/2017/cp-13-61-2017-supplement.zip	-67.43	93.38	1407	105th km	1757	1987	d2H	permil	glacier ice	glacier ice		precipitation	Ekaykin et al., 2017. The apparent isotopea€“temperature gradient, obtained as a standard deviation of isotopic values divided by standard deviations of temperature values, is 13.8A±2.5 permil/A°C.	positive	P_isotope	annual	TRUE	http://lipdverse.org/iso2k/1_0_0/IC14VL1K.html	AO (01/16/2019)
IC15GANK01A	IC15GANK	IC15GANK01A	GlacierIce	10.1007/s00382-015-2584-3	Gao, J., Risi, C., Masson-Delmotte, V., He, Y. and Xu, B.: Southern Tibetan Plateau ice core δ18O reflects abrupt shifts in atmospheric circulation in the late 1970s, Climate Dynamics, 46(1-2), 291–302, doi:10.1007/s00382-015-2584-3, 2015.			https://www.ncdc.noaa.gov/paleo-search/study/21171	29.04	90.2	5950	Noijin Kangsang Glacier	1864	2006	d18O	permil	glacier ice	glacier ice		precipitation	Tian, L., V. Masson-Delmotte, M. Stievenard, T. Yao and J. Jouzel.2001. Tibetan Plateau summer monsoon northward extent revealed by measurements of water stable isotopes.J. Geophys. Res., 106(D22), 28,081?28,088.	positive	P_isotope	annual	TRUE	http://lipdverse.org/iso2k/1_0_0/IC15GANK.html	TO
IC15MANE00A	IC15MANE	IC15MANE00A	GlacierIce	10.5194/tc-9-1481-2015	Masson-Delmotte, V., Steen-Larsen, H. C., Ortega, P., Swingedouw, D., Popp, T., Vinther, B. M., Oerter, H., Sveinbjornsdottir, A. E., Gudlaugsdottir, H., Box, J. E., Falourd, S., Fettweis, X., Gallee, H., Garnier, E., Gkinis, V., Jouzel, J., Landais, A., Minster, B., Paradis, N., Orsi, A., Risi, C., Werner, M. and White, J. W. C.: Recent changes in north-west Greenland climate documented by NEEM …			this compilation	77.45	-51.06	2450	NEEM	1724	2011	d18O	permil	glacier ice	glacier ice		precipitation	Dansgaard W. 1964. Stable isotopes in precipitation. Tellus 16: 436a€“468.	positive	P_isotope	annual	TRUE	http://lipdverse.org/iso2k/1_0_0/IC15MANE.html	DVD
IC15MANE01B	IC15MANE	IC15MANE01B	GlacierIce	10.5194/tc-9-1481-2015	Masson-Delmotte, V., Steen-Larsen, H. C., Ortega, P., Swingedouw, D., Popp, T., Vinther, B. M., Oerter, H., Sveinbjornsdottir, A. E., Gudlaugsdottir, H., Box, J. E., Falourd, S., Fettweis, X., Gallee, H., Garnier, E., Gkinis, V., Jouzel, J., Landais, A., Minster, B., Paradis, N., Orsi, A., Risi, C., Werner, M. and White, J. W. C.: Recent changes in north-west Greenland climate documented by NEEM …			this compilation	77.45	-51.06	2450	NEEM	1724	2011	deuteriumExcess	permil	glacier ice	glacier ice		precipitation	Dansgaard W. 1964. Stable isotopes in precipitation. Tellus 16: 436a€“468.	positive	P_isotope	annual	TRUE	http://lipdverse.org/iso2k/1_0_0/IC15MANE.html	DVD
IC16GOBP01A	IC16GOBP	IC16GOBP01A	GlacierIce	10.1175/JCLI-D-15-0354.1	Goodwin, B. P., Mosley-Thompson, E., Wilson, A. B., Porter, S. E. and Sierra-Hernandez, M. R.: Accumulation Variability in the Antarctic Peninsula: The Role of Large-Scale Atmospheric Oscillations and Their Interactions, Journal of Climate, 29(7), 2579–2596, doi:10.1175/jcli-d-15-0354.1, 2016.			https://www.ncdc.noaa.gov/paleo/study/20350	-66.04	-64.08	1975.5	Bruce Plateau	1900	2009	d18O	permil	glacier ice	glacier ice		precipitation	Isotope interpreted as responding to SAM variations	positive	P_isotope	annual	TRUE	http://lipdverse.org/iso2k/1_0_0/IC16GOBP.html	AO (01/16/2019)
IC16WE1701A	IC16WE17	IC16WE1701A	GlacierIce	10.5194/cp-12-171-2016	WeiSSbach, S., Wegner, A., Opel, T., Oerter, H., Vinther, B. M. and Kipfstuhl, S.: Spatial and temporal oxygen isotope variability in northern Greenland – implications for a new climate record over the past millennium, Climate of the Past, 12(2), 171–188, doi:10.5194/cp-12-171-2016, 2016.			https://doi.pangaea.de/10.1594/PANGAEA.849161	75.2504	-37.6248	2820	B17	1363	1992	d18O	permil	glacier ice	glacier ice		precipitation	Dansgaard W. 1964. Stable isotopes in precipitation. Tellus 16: 436?468.	positive	P_isotope	annual	TRUE	http://lipdverse.org/iso2k/1_0_0/IC16WE17.html	DVD
IC16WE1901A	IC16WE19	IC16WE1901A	GlacierIce	10.5194/cp-12-171-2016	WeiSSbach, S., Wegner, A., Opel, T., Oerter, H., Vinther, B. M. and Kipfstuhl, S.: Spatial and temporal oxygen isotope variability in northern Greenland – implications for a new climate record over the past millennium, Climate of the Past, 12(2), 171–188, doi:10.5194/cp-12-171-2016, 2016.			https://doi.pangaea.de/10.1594/PANGAEA.849161	78.0006	-36.3978	2234	B19	753	1953	d18O	permil	glacier ice	glacier ice		precipitation	Dansgaard W. 1964. Stable isotopes in precipitation. Tellus 16: 436?468.	positive	P_isotope	annual	TRUE	http://lipdverse.org/iso2k/1_0_0/IC16WE19.html	DVD
IC16WE2001A	IC16WE20	IC16WE2001A	GlacierIce	10.5194/cp-12-171-2016	WeiSSbach, S., Wegner, A., Opel, T., Oerter, H., Vinther, B. M. and Kipfstuhl, S.: Spatial and temporal oxygen isotope variability in northern Greenland – implications for a new climate record over the past millennium, Climate of the Past, 12(2), 171–188, doi:10.5194/cp-12-171-2016, 2016.			https://doi.pangaea.de/10.1594/PANGAEA.849161	78.8333	-36.5	2147	B20	775	1993	d18O	permil	glacier ice	glacier ice		precipitation	Dansgaard W. 1964. Stable isotopes in precipitation. Tellus 16: 436?468.	positive	P_isotope	annual	TRUE	http://lipdverse.org/iso2k/1_0_0/IC16WE20.html	DVD
IC16WE2201A	IC16WE22	IC16WE2201A	GlacierIce	10.5194/cp-12-171-2016	WeiSSbach, S., Wegner, A., Opel, T., Oerter, H., Vinther, B. M. and Kipfstuhl, S.: Spatial and temporal oxygen isotope variability in northern Greenland – implications for a new climate record over the past millennium, Climate of the Past, 12(2), 171–188, doi:10.5194/cp-12-171-2016, 2016.			https://doi.pangaea.de/10.1594/PANGAEA.849161	79.3414	-45.9116	2242	B22	1372	1993	d18O	permil	glacier ice	glacier ice		precipitation	Dansgaard W. 1964. Stable isotopes in precipitation. Tellus 16: 436?468.	positive	P_isotope	annual	TRUE	http://lipdverse.org/iso2k/1_0_0/IC16WE22.html	DVD
IC16WE2301A	IC16WE23	IC16WE2301A	GlacierIce	10.5194/cp-12-171-2016	WeiSSbach, S., Wegner, A., Opel, T., Oerter, H., Vinther, B. M. and Kipfstuhl, S.: Spatial and temporal oxygen isotope variability in northern Greenland – implications for a new climate record over the past millennium, Climate of the Past, 12(2), 171–188, doi:10.5194/cp-12-171-2016, 2016.			https://doi.pangaea.de/10.1594/PANGAEA.849161	78	-44	2543	B23	1023	1993	d18O	permil	glacier ice	glacier ice		precipitation	Dansgaard W. 1964. Stable isotopes in precipitation. Tellus 16: 436?468.	positive	P_isotope	annual	TRUE	http://lipdverse.org/iso2k/1_0_0/IC16WE23.html	DVD
IC16WE2701A	IC16WE27	IC16WE2701A	GlacierIce	10.5194/cp-12-171-2016	WeiSSbach, S., Wegner, A., Opel, T., Oerter, H., Vinther, B. M. and Kipfstuhl, S.: Spatial and temporal oxygen isotope variability in northern Greenland – implications for a new climate record over the past millennium, Climate of the Past, 12(2), 171–188, doi:10.5194/cp-12-171-2016, 2016.			https://doi.pangaea.de/10.1594/PANGAEA.849161	76.6594	-46.4837	2733	B27	1195	1994	d18O	permil	glacier ice	glacier ice		precipitation	Dansgaard W. 1964. Stable isotopes in precipitation. Tellus 16: 436?468.	positive	P_isotope	annual	TRUE	http://lipdverse.org/iso2k/1_0_0/IC16WE27.html	DVD
IC16WE2801A	IC16WE28	IC16WE2801A	GlacierIce	10.5194/cp-12-171-2016	WeiSSbach, S., Wegner, A., Opel, T., Oerter, H., Vinther, B. M. and Kipfstuhl, S.: Spatial and temporal oxygen isotope variability in northern Greenland – implications for a new climate record over the past millennium, Climate of the Past, 12(2), 171–188, doi:10.5194/cp-12-171-2016, 2016.			https://doi.pangaea.de/10.1594/PANGAEA.849161	76.6594	-46.4837	2733	B28	1762	1949	d18O	permil	glacier ice	glacier ice		precipitation	Dansgaard W. 1964. Stable isotopes in precipitation. Tellus 16: 436?468.	positive	P_isotope	annual	TRUE	http://lipdverse.org/iso2k/1_0_0/IC16WE28.html	DVD
IC16WE3001A	IC16WE30	IC16WE3001A	GlacierIce	10.5194/cp-12-171-2016	WeiSSbach, S., Wegner, A., Opel, T., Oerter, H., Vinther, B. M. and Kipfstuhl, S.: Spatial and temporal oxygen isotope variability in northern Greenland – implications for a new climate record over the past millennium, Climate of the Past, 12(2), 171–188, doi:10.5194/cp-12-171-2016, 2016.			https://doi.pangaea.de/10.1594/PANGAEA.849161	75.0016	-42.0004	2947	B30	1242	1988	d18O	permil	glacier ice	glacier ice		precipitation	Dansgaard W. 1964. Stable isotopes in precipitation. Tellus 16: 436?468.	positive	P_isotope	annual	TRUE	http://lipdverse.org/iso2k/1_0_0/IC16WE30.html	DVD
IC16WENG00A	IC16WENG	IC16WENG00A	GlacierIce	10.5194/cp-12-171-2016	WeiSSbach, S., Wegner, A., Opel, T., Oerter, H., Vinther, B. M. and Kipfstuhl, S.: Spatial and temporal oxygen isotope variability in northern Greenland – implications for a new climate record over the past millennium, Climate of the Past, 12(2), 171–188, doi:10.5194/cp-12-171-2016, 2016.			https://doi.pangaea.de/10.1594/PANGAEA.849161	76	-46		NG-stack	753	1994	d18O	zscore	glacier ice	glacier ice		precipitation	Dansgaard W. 1964. Stable isotopes in precipitation. Tellus 16: 436a€“468.	positive	P_isotope	annual	TRUE	http://lipdverse.org/iso2k/1_0_0/IC16WENG.html	DVD
IC17BERI01A	IC17BERI	IC17BERI01A	GlacierIce	10.5194/cp-14-193-2018	Bertler, N. A. N., Conway, H., Dahl-Jensen, D., Emanuelsson, D. B., Winstrup, M., Vallelonga, P. T., Lee, J. E., Brook, E. J., Severinghaus, J. P., Fudge, T. J., Keller, E. D., Baisden, W. T., Hindmarsh, R. C. A., Neff, P. D., Blunier, T., Edwards, R., Mayewski, P. A., Kipfstuhl, S., Buizert, C., Canessa, S., Dadic, R., Kjaer, H. A., Kurbatov, A., Zhang, D., Waddington, E. D., Baccolo, G., Beers,…			https://doi.pangaea.de/10.1594/PANGAEA.880396	-79.36	-161.7	550	RICE (Rosevelt Island)	-187	2012	d2H	permil	glacier ice	glacier ice		precipitation	From the comparison between RICE I´Do and ERAi SAT records, we obtain a temporal slope of 3.37 permil/A°C	positive	P_isotope	annual	TRUE	http://lipdverse.org/iso2k/1_0_0/IC17BERI.html	AO (01/16/2019)
IC17EK4K01A	IC17EK4K	IC17EK4K01A	GlacierIce	10.5194/cp-2016-76	Ekaykin, A. A., Vladimirova, D. O., Lipenkov, V. Y. and Masson-Delmotte, V.: Climatic variability in Princess Elizabeth Land (East Antarctica) overthe last 350 years, , doi:10.5194/cp-2016-76, 2016.			https://www.ncdc.noaa.gov/paleo-search/study/22589	-69.95	95.62	2777	400th km	1254	1987	d2H	permil	glacier ice	glacier ice		precipitation	Ekaykin et al., 2017. The apparent isotopea€“temperature gradient, obtained as a standard deviation of isotopic values divided by standard deviations of temperature values, is 13.8A±2.5 permil/A°C.	positive	P_isotope	annual	TRUE	http://lipdverse.org/iso2k/1_0_0/IC17EK4K.html	AO (01/16/2019)
IC17EKN101A	IC17EKN1	IC17EKN101A	GlacierIce	10.5194/cp-2016-76	Ekaykin, A. A., Vladimirova, D. O., Lipenkov, V. Y. and Masson-Delmotte, V.: Climatic variability in Princess Elizabeth Land (East Antarctica) overthe last 350 years, , doi:10.5194/cp-2016-76, 2016.			https://www.ncdc.noaa.gov/paleo-search/study/22589	-77.11	95.07	3775	NVFL-1	1711	1944	d18O	permil	glacier ice	glacier ice		precipitation	Ekaykin et al., 2017. The apparent isotopea€“temperature gradient, obtained as a standard deviation of isotopic values divided by standard deviations of temperature values, is 13.8A±2.5 permil/A°C.	positive	P_isotope	annual	TRUE	http://lipdverse.org/iso2k/1_0_0/IC17EKN1.html	AO (01/16/2019)
IC17EKN301A	IC17EKN3	IC17EKN301A	GlacierIce	10.5194/cp-2016-76	Ekaykin, A. A., Vladimirova, D. O., Lipenkov, V. Y. and Masson-Delmotte, V.: Climatic variability in Princess Elizabeth Land (East Antarctica) overthe last 350 years, , doi:10.5194/cp-2016-76, 2016.			https://www.ncdc.noaa.gov/paleo-search/study/22589	-76.41	102.17	3528	NVFL-3	1978	2009	d2H	permil	glacier ice	glacier ice		precipitation	Ekaykin et al., 2017. The apparent isotopea€“temperature gradient, obtained as a standard deviation of isotopic values divided by standard deviations of temperature values, is 13.8A±2.5 permil/A°C.	positive	P_isotope	annual	TRUE	http://lipdverse.org/iso2k/1_0_0/IC17EKN3.html	AO (01/16/2019)
IC17EKPV01A	IC17EKPV	IC17EKPV01A	GlacierIce	10.5194/cp-2016-76	Ekaykin, A. A., Vladimirova, D. O., Lipenkov, V. Y. and Masson-Delmotte, V.: Climatic variability in Princess Elizabeth Land (East Antarctica) overthe last 350 years, , doi:10.5194/cp-2016-76, 2016.			https://www.ncdc.noaa.gov/paleo-search/study/22589	-72.81	79.93	2800	PV-10	1976	2009	d18O	permil	glacier ice	glacier ice		precipitation	Ekaykin et al., 2017. The apparent isotopea€“temperature gradient, obtained as a standard deviation of isotopic values divided by standard deviations of temperature values, is 13.8A±2.5 permil/A°C.	positive	P_isotope	annual	TRUE	http://lipdverse.org/iso2k/1_0_0/IC17EKPV.html	AO (01/16/2019)
IC17KOEL00B	IC17KOEL	IC17KOEL00B	GlacierIce	10.5194/cp-13-473-2017	Kozachek, A., Mikhalenko, V., Masson-Delmotte, V., Ekaykin, A., Ginot, P., Kutuzov, S., Legrand, M., Lipenkov, V. and Preunkert, S.: Large-scale drivers of Caucasus climate variability in meteorological records and Mt El’brus ice cores, Climate of the Past, 13(5), 473–489, doi:10.5194/cp-13-473-2017, 2017.			this compilation	43.3483	42.4267	5115	Elbrus	1914	2013	d18O	permil	glacier ice	glacier ice		precipitation	Dansgaard W. 1964. Stable isotopes in precipitation. Tellus 16: 436a€“468.	positive	P_isotope	annual	TRUE	http://lipdverse.org/iso2k/1_0_0/IC17KOEL.html	TO
IC17KOEL00D	IC17KOEL	IC17KOEL00D	GlacierIce	10.5194/cp-13-473-2017	Kozachek, A., Mikhalenko, V., Masson-Delmotte, V., Ekaykin, A., Ginot, P., Kutuzov, S., Legrand, M., Lipenkov, V. and Preunkert, S.: Large-scale drivers of Caucasus climate variability in meteorological records and Mt El’brus ice cores, Climate of the Past, 13(5), 473–489, doi:10.5194/cp-13-473-2017, 2017.			this compilation	43.3483	42.4267	5115	Elbrus	1914	2013	deuteriumExcess	permil	glacier ice	glacier ice		precipitation	Dansgaard W. 1964. Stable isotopes in precipitation. Tellus 16: 436a€“468.	positive	P_isotope	annual	TRUE	http://lipdverse.org/iso2k/1_0_0/IC17KOEL.html	TO
IC76FIDE01A	IC76FIDE	IC76FIDE01A	GlacierIce	10.1038/301205a0	Fisher, D. A., Koerner, R. M., Paterson, W. S. B., Dansgaard, W., Gundestrup, N. and Reeh, N.: Effect of wind scouring on climatic records from ice-core oxygen-isotope profiles, Nature, 301(5897), 205–209, doi:10.1038/301205a0, 1983.			https://www1.ncdc.noaa.gov/pub/data/paleo/icecore/polar/devon/d7273del_5yr.txt	75.33	-82.5	1800	Devon Ice Cap	1	1971	d18O	permil	glacier ice	glacier ice		precipitation	Dansgaard W. 1964. Stable isotopes in precipitation. Tellus 16: 436a€“468.	positive	P_isotope	annual	TRUE	http://lipdverse.org/iso2k/1_0_0/IC76FIDE.html	ET (12/30/2019)
IC76FIDE02A	IC76FIDE	IC76FIDE02A	GlacierIce	10.1038/301205a0	Fisher, D. A., Koerner, R. M., Paterson, W. S. B., Dansgaard, W., Gundestrup, N. and Reeh, N.: Effect of wind scouring on climatic records from ice-core oxygen-isotope profiles, Nature, 301(5897), 205–209, doi:10.1038/301205a0, 1983.			https://www1.ncdc.noaa.gov/pub/data/paleo/icecore/polar/devon/d7273del_5yr.txt	75.33	-82.5	1800	Devon Ice Cap	1509	1958	d18O	permil	glacier ice	glacier ice		precipitation	Dansgaard W. 1964. Stable isotopes in precipitation. Tellus 16: 436a€“468.	positive	P_isotope	annual	TRUE	http://lipdverse.org/iso2k/1_0_0/IC76FIDE.html	TP
IC82STVE01A	IC82STVE	IC82STVE01A	GlacierIce	{stichler1982core}				https://doi.pangaea.de/10.1594/PANGAEA.770159	46.8842	10.8256	3150	Vernagtferner VF79_core1	1896	1977	d18O	permil	glacier ice	glacier ice		precipitation	This annual variation of the isotope content of precipitation usually remains detectable in snow covers (Moser and Stichler, 1975).	positive	P_isotope	annual	TRUE	http://lipdverse.org/iso2k/1_0_0/IC82STVE.html	TO
IC82STVE01B	IC82STVE	IC82STVE01B	GlacierIce	{stichler1982core}				https://doi.pangaea.de/10.1594/PANGAEA.770159	46.8842	10.8256	3150	Vernagtferner VF79_core1	1896	1977	d2H	permil	glacier ice	glacier ice		precipitation	This annual variation of the isotope content of precipitation usually remains detectable in snow covers (Moser and Stichler, 1975).	positive	P_isotope	annual	TRUE	http://lipdverse.org/iso2k/1_0_0/IC82STVE.html	TO
IC82STVE01C	IC82STVE	IC82STVE01C	GlacierIce	{stichler1982core}				https://doi.pangaea.de/10.1594/PANGAEA.770159	46.8842	10.8256	3150	Vernagtferner VF79_core1	1896	1977	deuteriumExcess	permil	glacier ice	glacier ice		precipitation	This annual variation of the isotope content of precipitation usually remains detectable in snow covers (Moser and Stichler, 1975).	positive	P_isotope	annual	TRUE	http://lipdverse.org/iso2k/1_0_0/IC82STVE.html	TO
IC85LAD201A	IC85LAD2	IC85LAD201A	GlacierIce	10.1029/GM033	Langway, C. C., Oeschger, H. and Dansgaard, W., Eds.: Greenland Ice Core: Geophysics, Geochemistry, and the Environment, Geophysical Monograph Series, doi:10.1029/gm033, 1985.			https://www1.ncdc.noaa.gov/pub/data/paleo/icecore/greenland/gisp/dye2/dye2ad77.txt	66.38	-46.18	2200	DYE2	1742	1974	d18O	permil	glacier ice	glacier ice		precipitation	Dansgaard W. 1964. Stable isotopes in precipitation. Tellus 16: 436a€“468.	positive	P_isotope	annual	TRUE	http://lipdverse.org/iso2k/1_0_0/IC85LAD2.html	DVD
IC92HOML01A	IC92HOML	IC92HOML01A	GlacierIce	{holdsworth1992logan}				https://www.ncdc.noaa.gov/paleo-search/study/2436	60.58	-140.58	5340	Mt Logan (NWCol)	1736	1987	d18O	permil	glacier ice	glacier ice		precipitation		positive	P_isotope	annual	TRUE	http://lipdverse.org/iso2k/1_0_0/IC92HOML.html	TO
IC93BAGI01A	IC93BAGI	IC93BAGI01A	GlacierIce	10.1029/93GL03305	Barlow, L. K., White, J. W. C., Barry, R. G., Rogers, J. C. and Grootes, P. M.: The North Atlantic Oscillation signature in deuterium and deuterium excess signals in the Greenland Ice Sheet Project 2 Ice Core, 1840-1970, Geophysical Research Letters, 20(24), 2901–2904, doi:10.1029/93gl03305, 1993.			https://www.ncdc.noaa.gov/paleo-search/study/17798	72.59	-38.46	3200	GISP2-B	1300	1985	d2H	permil	glacier ice	glacier ice		precipitation	Dansgaard W. 1964. Stable isotopes in precipitation. Tellus 16: 436a€“468.	positive	P_isotope	annual	TRUE	http://lipdverse.org/iso2k/1_0_0/IC93BAGI.html	DVD
IC94THDP01A	IC94THDP	IC94THDP01A	GlacierIce	10.3189/172756494794587438	Thompson, L. G., Peel, D. A., Mosley-thompson, E., Mulvaney, R., Dal, J., Lin, P. N., Davis, M. E. and Raymond, C. F.: Climate since AD 1510 on Dyer Plateau, Antarctic Peninsula: evidence for recent climate change, Annals of Glaciology, 20, 420–426, doi:10.3189/1994aog20-1-420-426, 1994.			https://www.ncdc.noaa.gov/paleo-search/study/6182	-70.68	-64.87	2002	Dyer Plateau	1505	1988	d18O	permil	glacier ice	glacier ice		precipitation	spatial slope (Jouzel et al., 2003,Magnitude of isotope/temperature scaling for interpretation of central Antarctic ice cores https://doi.org/10.1029/2002JD002677)	positive	P_isotope	annual	TRUE	http://lipdverse.org/iso2k/1_0_0/IC94THDP.html	AO (01/16/2019)
IC95FI8701A	IC95FI87	IC95FI8701A	GlacierIce	10.1177/095968369500500103	Fisher, D. A., Koerner, R. M. and Reeh, N.: Holocene climatic records from Agassiz Ice Cap, Ellesmere Island, NWT, Canada, The Holocene, 5(1), 19–24, doi:10.1177/095968369500500103, 1995.			https://www1.ncdc.noaa.gov/pub/data/paleo/icecore/polar/agassiz/a87del18_1yr.txt	80.7	-73.1	1730	Agassiz A87	1304	1961	d18O	permil	glacier ice	glacier ice		precipitation	Correlation with nearby Halley Station meteorological data 5thompson et al, 1994, fig 4)	positive	P_isotope	annual	TRUE	http://lipdverse.org/iso2k/1_0_0/IC95FI87.html	DVD
IC95THHU02B	IC95THHU	IC95THHU02B	GlacierIce	10.1126/science.269.5220.46	Thompson, L. G., Mosley-Thompson, E., Davis, M. E., Lin, P.-N., Henderson, K. A., Cole-Dai, J., Bolzan, J. F. and Liu, K. -b.: Late Glacial Stage and Holocene Tropical Ice Core Records from Huascaran, Peru, Science, 269(5220), 46–50, doi:10.1126/science.269.5220.46, 1995.			https://www.ncdc.noaa.gov/paleo/study/2447	-9	-77.5	6048	Nevado HuascarA¡n Core 2	1894	1993	d18O	permil	glacier ice	glacier ice		precipitation	Dansgaard W. 1964. Stable isotopes in precipitation. Tellus 16: 436a€“468.	positive	P_isotope	annual	TRUE	http://lipdverse.org/iso2k/1_0_0/IC95THHU.html	TO
IC95THHU02A	IC95THHU	IC95THHU02A	GlacierIce	10.1126/science.269.5220.46	Thompson, L. G., Mosley-Thompson, E., Davis, M. E., Lin, P.-N., Henderson, K. A., Cole-Dai, J., Bolzan, J. F. and Liu, K. -b.: Late Glacial Stage and Holocene Tropical Ice Core Records from Huascaran, Peru, Science, 269(5220), 46–50, doi:10.1126/science.269.5220.46, 1995.			https://www.ncdc.noaa.gov/paleo/study/2447	-9	-77.5	6048	Nevado HuascarA¡n Core 2	1894	1993	d18O	permil	glacier ice	glacier ice		precipitation	Dansgaard W. 1964. Stable isotopes in precipitation. Tellus 16: 436a€“468.	positive	P_isotope	annual	TRUE	http://lipdverse.org/iso2k/1_0_0/IC95THHU.html	TO
IC95THHU01B	IC95THHU	IC95THHU01B	GlacierIce	10.1126/science.269.5220.46	Thompson, L. G., Mosley-Thompson, E., Davis, M. E., Lin, P.-N., Henderson, K. A., Cole-Dai, J., Bolzan, J. F. and Liu, K. -b.: Late Glacial Stage and Holocene Tropical Ice Core Records from Huascaran, Peru, Science, 269(5220), 46–50, doi:10.1126/science.269.5220.46, 1995.			https://www.ncdc.noaa.gov/paleo/study/2447	-9	-77.5	6048	Nevado HuascarA¡n Core 2	1894	1993	d18O	permil	glacier ice	glacier ice		precipitation	Dansgaard W. 1964. Stable isotopes in precipitation. Tellus 16: 436a€“468.	positive	P_isotope	annual	TRUE	http://lipdverse.org/iso2k/1_0_0/IC95THHU.html	TO
IC95THHU02C	IC95THHU	IC95THHU02C	GlacierIce	10.1126/science.269.5220.46	Thompson, L. G., Mosley-Thompson, E., Davis, M. E., Lin, P.-N., Henderson, K. A., Cole-Dai, J., Bolzan, J. F. and Liu, K. -b.: Late Glacial Stage and Holocene Tropical Ice Core Records from Huascaran, Peru, Science, 269(5220), 46–50, doi:10.1126/science.269.5220.46, 1995.			https://www.ncdc.noaa.gov/paleo/study/2447	-9	-77.5	6048	Nevado HuascarA¡n Core 2	1893.5	1993.5	d18O	permil	glacier ice	glacier ice		precipitation	Dansgaard W. 1964. Stable isotopes in precipitation. Tellus 16: 436a€“468.	positive	P_isotope	annual	TRUE	http://lipdverse.org/iso2k/1_0_0/IC95THHU.html	TO
IC96ISE901A	IC96ISE9	IC96ISE901A	GlacierIce	10.1029/95JD03232	Isaksson, E., Karlen, W., Gundestrup, N., Mayewski, P., Whitlow, S. and Twickler, M.: A century of accumulation and temperature changes in Dronning Maud Land, Antarctica, Journal of Geophysical Research: Atmospheres, 101(D3), 7085–7094, doi:10.1029/95jd03232, 1996.			https://www.ncdc.noaa.gov/paleo/study/2424	-73.6	-12.43	700	DML Ritscherflya E91	1932	1991	d18O	permil	glacier ice	glacier ice		precipitation	We have determined a gradient of 1.16 permil/A°C for this area based on a linear regression with the mean d18O and borehole 10-m temperature. (Isaksson and Karlen, Clim.Changes, 1994)	positive	P_isotope	annual	TRUE	http://lipdverse.org/iso2k/1_0_0/IC96ISE9.html	AO (01/16/2019)
IC96MOSS01A	IC96MOSS	IC96MOSS01A	GlacierIce	10.3189/S0260305500008570	Mosley-Thompson, E., Thompson, L. G., Grootes, P. M. and Gundestrup, N.: Little Ice Age (Neoglacial) Paleoenvironmental Conditions At Siple Station, Antarctica, Annals of Glaciology, 14, 199–204, doi:10.3189/s0260305500008570, 1990.			www.ncdc.noaa.gov/paleo-search/study/27330	-75.92	-84.25	1054	Siple Station	1417	1983	d18O	permil	glacier ice	glacier ice		precipitation	Comparison with meteorological stations. No quantification attempted. "For the purpose of this paper the d18O is assumed to provide a proxy history for the condensation temperature of Siple precipitation."	positive	P_isotope	annual	TRUE	http://lipdverse.org/iso2k/1_0_0/IC96MOSS.html	AO (01/16/2019)
IC97GRGI01A	IC97GRGI	IC97GRGI01A	GlacierIce	10.1029/97JC00880	Grootes, P. M. and Stuiver, M.: Oxygen 18/16 variability in Greenland snow and ice with 10−3- to 105-year time resolution, Journal of Geophysical Research: Oceans, 102(C12), 26455–26470, doi:10.1029/97jc00880, 1997.			https://www.ncdc.noaa.gov/paleo/study/17796	72.6	-38.5	3200	GISP2	818	1987	d18O	permil	glacier ice	glacier ice		precipitation	Dansgaard W. 1964. Stable isotopes in precipitation. Tellus 16: 436a€“468.	positive	P_isotope	annual	TRUE	http://lipdverse.org/iso2k/1_0_0/IC97GRGI.html	DVD
IC97THGL01A	IC97THGL	IC97THGL01A	GlacierIce	10.1126/science.276.5320.1821	Thompson, L. G.: Tropical Climate Instability: The Last Glacial Cycle from a Qinghai-Tibetan Ice Core, Science, 276(5320), 1821–1825, doi:10.1126/science.276.5320.1821, 1997.			https://www.ncdc.noaa.gov/paleo/study/12426	35.2833	81.4833	6200	Guliya	1010	1990	d18O	permil	glacier ice	glacier ice		precipitation	Yao, T., Thompson, L. G., Mosley-Thompson, E., Zhihong, Y., Xingping, Z., and Lin, P.-N.: 1996,Climatological Significance of ?18O in North Tibetan Ice Cores, J. Geophys. Res. 101, 29531?29537	positive	P_isotope	annual	TRUE	http://lipdverse.org/iso2k/1_0_0/IC97THGL.html	TO
IC98FIPE01A	IC98FIPE	IC98FIPE01A	GlacierIce	10.1126/science.279.5351.692	Fisher, D. A., Koerner, R. M., Bourgeois, J. C., Zielinski, G., Wake, C., Hammer, C. U., Clausen, H. B., Gundestrup, N., Johnsen, S., Goto-Azuma, K., Hondoh, T., Blake, E. and Gerasimoff, M.: Penny Ice Cap Cores, Baffin Island, Canada, and the Wisconsinan Foxe Dome Connection: Two States of Hudson Bay Ice Cover, Science, 279(5351), 692–695, doi:10.1126/science.279.5351.692, 1998.			www.ncdc.noaa.gov/paleo/study/2474	67.25	-66.75	1900	Penny Ice cap	5	1980	d18O	permil	glacier ice	glacier ice		precipitation	Dansgaard W. 1964. Stable isotopes in precipitation. Tellus 16: 436a€“468.	positive	P_isotope	annual	TRUE	http://lipdverse.org/iso2k/1_0_0/IC98FIPE.html	DVD
IC98THSA01A	IC98THSA	IC98THSA01A	GlacierIce	10.1126/science.282.5395.1858	Thompson, L. G.: A 25,000-Year Tropical Climate History from Bolivian Ice Cores, Science, 282(5395), 1858–1864, doi:10.1126/science.282.5395.1858, 1998.			https://www.ncdc.noaa.gov/paleo-search/study/2448	-18.1	-68.9	6542	Sajama	-23101	2000	d18O	permil	glacier ice	glacier ice		precipitation		positive	P_isotope	annual	TRUE	http://lipdverse.org/iso2k/1_0_0/IC98THSA.html	TO
IC99IS8901A	IC99IS89	IC99IS8901A	GlacierIce	10.3189/172756499781821445	Isaksson, E., van den Broeke, M. R., Winther, J.-G., Karloef, L., Francis Pinglot, J. and Gundestrup, N.: Accumulation and proxy-temperature variability in Dronning Maud Land, Antarctica, determined from shallow firn cores, Annals of Glaciology, 29, 17–22, doi:10.3189/172756499781821445, 1999.			https://www.ncdc.noaa.gov/paleo/study/23231	-74.65	12.8	3406	Eastern DML L89 (DML Ice divide traverse L)	1962	1996	d18O	permil	glacier ice	glacier ice		precipitation	The gradient for this area is 0.73 permil/A°C (R2=0.98), which is very close to the gradient of 0.75 permil/A°C proposed for East Antarctica by Lorius and Merlivat (1977).	positive	P_isotope	annual	TRUE	http://lipdverse.org/iso2k/1_0_0/IC99IS89.html	AO (01/16/2019)
IC99ISS201A	IC99ISS2	IC99ISS201A	GlacierIce	10.3189/172756499781821445	Isaksson, E., van den Broeke, M. R., Winther, J.-G., Karloef, L., Francis Pinglot, J. and Gundestrup, N.: Accumulation and proxy-temperature variability in Dronning Maud Land, Antarctica, determined from shallow firn cores, Annals of Glaciology, 29, 17–22, doi:10.3189/172756499781821445, 1999.			https://www.ncdc.noaa.gov/paleo/study/23231	-70.25	4.82	63	DML Fimbulisen S20	1956	1996	d18O	permil	glacier ice	glacier ice		precipitation	The gradient for this area is 0.73 permil/A°C (R2=0.98), which is very close to the gradient of 0.75 permil/A°C proposed for East Antarctica by Lorius and Merlivat (1977).	positive	P_isotope	annual	TRUE	http://lipdverse.org/iso2k/1_0_0/IC99ISS2.html	AO (01/16/2019)
IC99OE0101A	IC99OE01	IC99OE0101A	GlacierIce	10.3189/172756402781816492	Graf, W., Oerter, H., Reinwarth, O., Stichler, W., Wilhelms, F., Miller, H. and Mulvaney, R.: Stable-isotope records from Dronning Maud Land, Antarctica, Annals of Glaciology, 35, 195–201, doi:10.3189/172756402781816492, 2002.	10.3189/172756499781820914	Oerter, H., Graf, W., Wilhelms, F., Minikin, A. and Miller, H.: Accumulation studies on Amundsenisen, Dronning Maud Land, Antarctica, by means of tritium, dielectric profiling and stable-isotope measurements: first results from the 1995–96 and 1996–97 field seasons, Annals of Glaciology, 29, 1–9, doi:10.3189/172756499781820914, 1999.	https://doi.pangaea.de/10.1594/PANGAEA.728240	-74.86	-2.55	2840	DML Plateau Amundsenisen FB96DML01	1895	1995	d18O	permil	glacier ice	glacier ice		precipitation	Graf et al., 2002 https://doi.org/10.3189/172756402781816492 DML spatial slope calibration	positive	P_isotope	annual	TRUE	http://lipdverse.org/iso2k/1_0_0/IC99OE01.html	AO (01/16/2019)
IC99OE0201A	IC99OE02	IC99OE0201A	GlacierIce	10.3189/172756402781816492	Graf, W., Oerter, H., Reinwarth, O., Stichler, W., Wilhelms, F., Miller, H. and Mulvaney, R.: Stable-isotope records from Dronning Maud Land, Antarctica, Annals of Glaciology, 35, 195–201, doi:10.3189/172756402781816492, 2002.	10.3189/172756499781820914	Oerter, H., Graf, W., Wilhelms, F., Minikin, A. and Miller, H.: Accumulation studies on Amundsenisen, Dronning Maud Land, Antarctica, by means of tritium, dielectric profiling and stable-isotope measurements: first results from the 1995–96 and 1996–97 field seasons, Annals of Glaciology, 29, 1–9, doi:10.3189/172756499781820914, 1999.	https://doi.pangaea.de/10.1594/PANGAEA.728240	-74.97	3.92	3027	DML Plateau Amundsenisen FB96DML02	1919	1995	d18O	permil	glacier ice	glacier ice		precipitation	Graf et al., 2002 https://doi.org/10.3189/172756402781816492 DML spatial slope calibration	positive	P_isotope	annual	TRUE	http://lipdverse.org/iso2k/1_0_0/IC99OE02.html	AO (01/16/2019)
IC99OE0301A	IC99OE03	IC99OE0301A	GlacierIce	10.3189/172756402781816492	Graf, W., Oerter, H., Reinwarth, O., Stichler, W., Wilhelms, F., Miller, H. and Mulvaney, R.: Stable-isotope records from Dronning Maud Land, Antarctica, Annals of Glaciology, 35, 195–201, doi:10.3189/172756402781816492, 2002.	10.3189/172756499781820914	Oerter, H., Graf, W., Wilhelms, F., Minikin, A. and Miller, H.: Accumulation studies on Amundsenisen, Dronning Maud Land, Antarctica, by means of tritium, dielectric profiling and stable-isotope measurements: first results from the 1995–96 and 1996–97 field seasons, Annals of Glaciology, 29, 1–9, doi:10.3189/172756499781820914, 1999.	https://doi.pangaea.de/10.1594/PANGAEA.728240	-74.49	1.97	2855	DML Plateau Amundsenisen FB97DML03	1941	1996	d18O	permil	glacier ice	glacier ice		precipitation	Graf et al., 2002 https://doi.org/10.3189/172756402781816492 DML spatial slope calibration	positive	P_isotope	annual	TRUE	http://lipdverse.org/iso2k/1_0_0/IC99OE03.html	AO (01/16/2019)
IC99OE0401A	IC99OE04	IC99OE0401A	GlacierIce	10.3189/172756402781816492	Graf, W., Oerter, H., Reinwarth, O., Stichler, W., Wilhelms, F., Miller, H. and Mulvaney, R.: Stable-isotope records from Dronning Maud Land, Antarctica, Annals of Glaciology, 35, 195–201, doi:10.3189/172756402781816492, 2002.	10.3189/172756499781820914	Oerter, H., Graf, W., Wilhelms, F., Minikin, A. and Miller, H.: Accumulation studies on Amundsenisen, Dronning Maud Land, Antarctica, by means of tritium, dielectric profiling and stable-isotope measurements: first results from the 1995–96 and 1996–97 field seasons, Annals of Glaciology, 29, 1–9, doi:10.3189/172756499781820914, 1999.	https://doi.pangaea.de/10.1594/PANGAEA.728240	-74.41	7.22	3179	DML Plateau Amundsenisen FB97DML04	1905	1996	d18O	permil	glacier ice	glacier ice		precipitation	Graf et al., 2002 https://doi.org/10.3189/172756402781816492 DML spatial slope calibration	positive	P_isotope	annual	TRUE	http://lipdverse.org/iso2k/1_0_0/IC99OE04.html	AO (01/16/2019)
IC99OE0502A	IC99OE05	IC99OE0502A	GlacierIce	10.3189/172756402781816492	Graf, W., Oerter, H., Reinwarth, O., Stichler, W., Wilhelms, F., Miller, H. and Mulvaney, R.: Stable-isotope records from Dronning Maud Land, Antarctica, Annals of Glaciology, 35, 195–201, doi:10.3189/172756402781816492, 2002.	10.3189/172756499781820914	Oerter, H., Graf, W., Wilhelms, F., Minikin, A. and Miller, H.: Accumulation studies on Amundsenisen, Dronning Maud Land, Antarctica, by means of tritium, dielectric profiling and stable-isotope measurements: first results from the 1995–96 and 1996–97 field seasons, Annals of Glaciology, 29, 1–9, doi:10.3189/172756499781820914, 1999.	https://doi.pangaea.de/10.1594/PANGAEA.728240	-75	0.01	2892	DML Plateau Amundsenisen FB97DML05	1930	1996	d18O	permil	glacier ice	glacier ice		precipitation	Graf et al., 2002 https://doi.org/10.3189/172756402781816492 DML spatial slope calibration	positive	P_isotope	annual	TRUE	http://lipdverse.org/iso2k/1_0_0/IC99OE05.html	AO (01/16/2019)
IC99OE0601A	IC99OE06	IC99OE0601A	GlacierIce	10.3189/172756402781816492	Graf, W., Oerter, H., Reinwarth, O., Stichler, W., Wilhelms, F., Miller, H. and Mulvaney, R.: Stable-isotope records from Dronning Maud Land, Antarctica, Annals of Glaciology, 35, 195–201, doi:10.3189/172756402781816492, 2002.	10.3189/172756499781820914	Oerter, H., Graf, W., Wilhelms, F., Minikin, A. and Miller, H.: Accumulation studies on Amundsenisen, Dronning Maud Land, Antarctica, by means of tritium, dielectric profiling and stable-isotope measurements: first results from the 1995–96 and 1996–97 field seasons, Annals of Glaciology, 29, 1–9, doi:10.3189/172756499781820914, 1999.	https://doi.pangaea.de/10.1594/PANGAEA.728240	-75	8.01	3246	DML Plateau Amundsenisen FB97DML06	1899	1996	d18O	permil	glacier ice	glacier ice		precipitation	Graf et al., 2002 https://doi.org/10.3189/172756402781816492 DML spatial slope calibration	positive	P_isotope	annual	TRUE	http://lipdverse.org/iso2k/1_0_0/IC99OE06.html	AO (01/16/2019)
IC99OE0702A	IC99OE07	IC99OE0702A	GlacierIce	10.3189/172756402781816492	Graf, W., Oerter, H., Reinwarth, O., Stichler, W., Wilhelms, F., Miller, H. and Mulvaney, R.: Stable-isotope records from Dronning Maud Land, Antarctica, Annals of Glaciology, 35, 195–201, doi:10.3189/172756402781816492, 2002.	10.3189/172756499781820914	Oerter, H., Graf, W., Wilhelms, F., Minikin, A. and Miller, H.: Accumulation studies on Amundsenisen, Dronning Maud Land, Antarctica, by means of tritium, dielectric profiling and stable-isotope measurements: first results from the 1995–96 and 1996–97 field seasons, Annals of Glaciology, 29, 1–9, doi:10.3189/172756499781820914, 1999.	https://doi.pangaea.de/10.1594/PANGAEA.728240	-74.59	-3.44	2680	DML Plateau Amundsenisen FB97DML07	1908	1996	d18O	permil	glacier ice	glacier ice		precipitation	Graf et al., 2002 https://doi.org/10.3189/172756402781816492 DML spatial slope calibration	positive	P_isotope	annual	TRUE	http://lipdverse.org/iso2k/1_0_0/IC99OE07.html	AO (01/16/2019)
IC99OE0801A	IC99OE08	IC99OE0801A	GlacierIce	10.3189/172756402781816492	Graf, W., Oerter, H., Reinwarth, O., Stichler, W., Wilhelms, F., Miller, H. and Mulvaney, R.: Stable-isotope records from Dronning Maud Land, Antarctica, Annals of Glaciology, 35, 195–201, doi:10.3189/172756402781816492, 2002.	10.3189/172756499781820914	Oerter, H., Graf, W., Wilhelms, F., Minikin, A. and Miller, H.: Accumulation studies on Amundsenisen, Dronning Maud Land, Antarctica, by means of tritium, dielectric profiling and stable-isotope measurements: first results from the 1995–96 and 1996–97 field seasons, Annals of Glaciology, 29, 1–9, doi:10.3189/172756499781820914, 1999.	https://doi.pangaea.de/10.1594/PANGAEA.728240	-75.75	3.29	2971	DML Plateau Amundsenisen FB97DML08	1919	1996	d18O	permil	glacier ice	glacier ice		precipitation	Graf et al., 2002 https://doi.org/10.3189/172756402781816492 DML spatial slope calibration	positive	P_isotope	annual	TRUE	http://lipdverse.org/iso2k/1_0_0/IC99OE08.html	AO (01/16/2019)
IC99OE0901A	IC99OE09	IC99OE0901A	GlacierIce	10.3189/172756402781816492	Graf, W., Oerter, H., Reinwarth, O., Stichler, W., Wilhelms, F., Miller, H. and Mulvaney, R.: Stable-isotope records from Dronning Maud Land, Antarctica, Annals of Glaciology, 35, 195–201, doi:10.3189/172756402781816492, 2002.	10.3189/172756499781820914	Oerter, H., Graf, W., Wilhelms, F., Minikin, A. and Miller, H.: Accumulation studies on Amundsenisen, Dronning Maud Land, Antarctica, by means of tritium, dielectric profiling and stable-isotope measurements: first results from the 1995–96 and 1996–97 field seasons, Annals of Glaciology, 29, 1–9, doi:10.3189/172756499781820914, 1999.	https://doi.pangaea.de/10.1594/PANGAEA.728240	-75.93	7.22	3156	DML Plateau Amundsenisen FB97DML09	1897	1996	d18O	permil	glacier ice	glacier ice		precipitation	Graf et al., 2002 https://doi.org/10.3189/172756402781816492 DML spatial slope calibration	positive	P_isotope	annual	TRUE	http://lipdverse.org/iso2k/1_0_0/IC99OE09.html	AO (01/16/2019)
IC99OE1001A	IC99OE10	IC99OE1001A	GlacierIce	10.3189/172756402781816492	Graf, W., Oerter, H., Reinwarth, O., Stichler, W., Wilhelms, F., Miller, H. and Mulvaney, R.: Stable-isotope records from Dronning Maud Land, Antarctica, Annals of Glaciology, 35, 195–201, doi:10.3189/172756402781816492, 2002.	10.3189/172756499781820914	Oerter, H., Graf, W., Wilhelms, F., Minikin, A. and Miller, H.: Accumulation studies on Amundsenisen, Dronning Maud Land, Antarctica, by means of tritium, dielectric profiling and stable-isotope measurements: first results from the 1995–96 and 1996–97 field seasons, Annals of Glaciology, 29, 1–9, doi:10.3189/172756499781820914, 1999.	https://doi.pangaea.de/10.1594/PANGAEA.728240	-75.22	11.35	3364	DML Plateau Amundsenisen FB97DML10	1900	1996	d18O	permil	glacier ice	glacier ice		precipitation	Graf et al., 2002 https://doi.org/10.3189/172756402781816492 DML spatial slope calibration	positive	P_isotope	annual	TRUE	http://lipdverse.org/iso2k/1_0_0/IC99OE10.html	AO (01/16/2019)
IC99SCFH01A	IC99SCFH	IC99SCFH01A	GlacierIce	10.1029/1998JD100112	Schwikowski, M., Bruetsch, S., Gaeggeler, H. W. and Schotterer, U.: A high-resolution air chemistry record from an Alpine ice core: Fiescherhorn glacier, Swiss Alps, Journal of Geophysical Research: Atmospheres, 104(D11), 13709–13719, doi:10.1029/1998jd100112, 1999.			this compilation	46.5481	8.0461	3890	Fiescherhorn	1946	1988	d18O	permil	glacier ice	glacier ice		precipitation	In winter the d18O also shows the most negative values because the temperatures during snow formation are lowest	positive	P_isotope	annual	TRUE	http://lipdverse.org/iso2k/1_0_0/IC99SCFH.html	TO
IW15MELD00A	IW15MELD	IW15MELD00A	GroundIce	10.1038/NGEO2349	Meyer, H., Opel, T., Laepple, T., Dereviagin, A. Y., Hoffmann, K. and Werner, M.: Long-term winter warming trend in the Siberian Arctic during the mid- to late Holocene, Nature Geoscience, 8(2), 122–125, doi:10.1038/ngeo2349, 2015.			https://doi.pangaea.de/10.1594/PANGAEA.842166	72.4	126	10	Lena River Delta	-5300	1977	d18O	permil	ice wedge ice	ice wedge ice		precipitation	Dansgaard W. 1964. Stable isotopes in precipitation. Tellus 16: 436?468.	positive	P_isotope	DJFMAM	TRUE	http://lipdverse.org/iso2k/1_0_0/IW15MELD.html	TO
IW17OPOY00A	IW17OPOY	IW17OPOY00A	GroundIce	10.1177/0959683617702229	Opel, T., Laepple, T., Meyer, H., Dereviagin, A. Y. and Wetterich, S.: Northeast Siberian ice wedges confirm Arctic winter warming over the past two millennia, The Holocene, 27(11), 1789–1796, doi:10.1177/0959683617702229, 2017.			https://doi.pangaea.de/10.1594/PANGAEA.873563	72.7	143.5	10	Oyogos Yar	152	2003.5	d18O	permil	ice wedge ice	ice wedge ice		precipitation	Dansgaard W. 1964. Stable isotopes in precipitation. Tellus 16: 436a€“468.	positive	P_isotope	DJFMAM	TRUE	http://lipdverse.org/iso2k/1_0_0/IW17OPOY.html	TO
LS00SEJU01	LS00SEJU	LS00SEJU01	LakeSediment	10.1130/0091-7613(2000)28<35:ieflqc>2.0.co;2	Seltzer, G., Rodbell, D. and Burns, S.: Isotopic evidence for late Quaternary climatic change in tropical South America, Geology, 28(1), 35, doi:10.1130/0091-7613(2000)28<35:ieflqc>2.0.co;2, 2000.			this compilation	-11.2	-75.8	4000	Laguna Junin	-844	1329	d18O	permil	carbonate	bulk carbonate	< 63 um calcite	lake water		negative	P_E	ONDJFM	TRUE	http://lipdverse.org/iso2k/1_0_0/LS00SEJU.html	MJ
LS00WODE	LS00WODE	LS00WODE01	LakeSediment	10.1006/qres.2000.2124	Wolfe, B. B., Edwards, T. W. D., Aravena, R., Forman, S. L., Warner, B. G., Velichko, A. A. and MacDonald, G. M.: Holocene Paleohydrology and Paleoclimate at Treeline, North-Central Russia, Inferred from Oxygen Isotope Records in Lake Sediment Cellulose, Quaternary Research, 53(3), 319–329, doi:10.1006/qres.2000.2124, 2000.			this compilation	69.23	86.57	50	Dervanoi	-7413.2	1899.2	d18O	permil	cellulose	cellulose	less than 500um sediment cellulose	lake water		positive	P_isotope	annual	TRUE	http://lipdverse.org/iso2k/1_0_0/LS00WODE.html	MJ
LS01HOCH	LS01HOCH	LS01HOCH01	LakeSediment	10.1126/science.1057759	Hodell, D. A.: Solar Forcing of Drought Frequency in the Maya Lowlands, Science, 292(5520), 1367–1370, doi:10.1126/science.1057759, 2001.			https://www.ncdc.noaa.gov/paleo/study/5483	19.8333	-88.75	5	Lake Chichancanab	-262.239	1981.5	d18O	permil	carbonate	gastropod	Pygophorus coronatus	lake water	The d18O record from Chichancanab generally supports our E/P inferences based on the S record	negative	P_E		TRUE	http://lipdverse.org/iso2k/1_0_0/LS01HOCH.html	MJ
LS01HUFA01b	LS01HUFA	LS01HUFA01	LakeSediment	10.1073/pnas.181333798	Hu, F. S., Ito, E., Brown, T. A., Curry, B. B. and Engstrom, D. R.: Pronounced climatic variations in Alaska during the last two millennia, Proceedings of the National Academy of Sciences, 98(19), 10552–10556, doi:10.1073/pnas.181333798, 2001.			https://www.ncdc.noaa.gov/paleo/study/10455	62.55	-153.633	320	Farewell Lake	-45.825	1962.4	d18O	permil	carbonate	bulk carbonate	calcite	lake water	Epstein et al., 1953 (GSAB 64:1315)	negative	T_water	JJA	TRUE	http://lipdverse.org/iso2k/1_0_0/LS01HUFA.html	DK
LS02BEPY	LS02BEPY	LS02BEPY01	LakeSediment	10.1016/S0277-3791(01)00048-8	Benson, L., Kashgarian, M., Rye, R., Lund, S., Paillet, F., Smoot, J., Kester, C., Mensing, S., Meko, D. and Lindstroem, S.: Holocene multidecadal and multicentennial droughts affecting Northern California and Nevada, Quaternary Science Reviews, 21(4-6), 659–682, doi:10.1016/s0277-3791(01)00048-8, 2002.			https://www.ncdc.noaa.gov/cdo/f?p=519:1:::::P1_STUDY_ID:5472	40.1	-119.6	1156	Pyramid	-846	1842	d18O	permil	carbonate	bulk carbonate	TIC	lake water	There are two principal sources of d18Oin to Pyramid Lake: Sierran snowmelt and Lake Tahoe overflow.Evaporation from Lake Tahoe has resulted in a d18O value (5.6m) much larger than that of snowmelt (14.6m). Thus, during droughts when Lake Fig. 19. Plot of TOC, d13C and d18O data from PLB98-2 (solid lines) and the top of PLC97-1 (dashed lines) indicating overlap of cores. 670 L. Benson et al. / Qu…	negative	P_E		TRUE	http://lipdverse.org/iso2k/1_0_0/LS02BEPY.html	MJ
GH319a119c	LS02HATI	LS02HATI01	LakeSediment	10.1191/0959683602hl548rp	Hammarlund, D., Barnekow, L., Birks, H. J. B., Buchardt, B. and Edwards, T. W. D.: Holocene changes in atmospheric circulation recorded in the oxygen-isotope stratigraphy of lacustrine carbonates from northern Sweden, The Holocene, 12(3), 339–351, doi:10.1191/0959683602hl548rp, 2002.			https://www.ncdc.noaa.gov/paleo/study/15444	68.33	18.7	560	tibetanus	-8236.25	1950	d18O	permil	carbonate	bulk carbonate	< 125 Aum	lake water	the water body is affected by a well-developed evaporative isotopic enrichment in spite ofthe rather short residence time (ca 20 days or less) as estimated from catchment size and meteorological data. Surface run-off from the catchment and direct precipitation seems to have no major impact on the isotopic composition oflake water during the ice-free season; groundwater level and related adjustmen…	negative	I_E	JJA	TRUE	http://lipdverse.org/iso2k/1_0_0/LS02HATI.html	DK
LS02ROSA	LS02ROSA	LS02ROSA01	LakeSediment	10.1006/qres.2001.2305	Rosenmeier, M. F., Hodell, D. A., Brenner, M., Curtis, J. H. and Guilderson, T. P.: A 4000-Year Lacustrine Record of Environmental Change in the Southern Maya Lowlands, Peten, Guatemala, Quaternary Research, 57(2), 183–190, doi:10.1006/qres.2001.2305, 2002.			this compilation	16.98	-89.666	104	Lake Salpeten	-1741	1999	d18O	permil	carbonate	ostracod	Physocypria globula	lake water	Correlation between d18O and Mg/Ca	negative	P_E		TRUE	http://lipdverse.org/iso2k/1_0_0/LS02ROSA.html	BK_20191230
LS03HAIG	LS03HAIG	LS03HAIG01	LakeSediment	10.1016/S0277-3791(02)00091-4	Hammarlund, D.: Rapid hydrological changes during the Holocene revealed by stable isotope records of lacustrine carbonates from Lake Igelsjoen, southern Sweden, Quaternary Science Reviews, 22(2-4), 353–370, doi:10.1016/s0277-3791(02)00091-4, 2003.			this compilation	58.47	13.73	111	Igelsjon	-9541.38	1894.58	d18O	permil	carbonate	gastropod	bulk carbonate, chara sp. and calcitic encrustations precipitated on Chara sp., and calcitic opercula of Bithynia tentaculata	lake water	and our interpretations are based on a simplistic climate-hydrology model in which variations in groundwater generation within the lake catchment produce changes in On a hydrogen-/oxygen-isotope cross-plot (Fig. 6) all groundwater samples as well as lake-water samples from January,March, and April plot close to the global meteoric water line (Craig, 1961), whereas lake-water samples from May to J…	negative	I_E	JJA	TRUE	http://lipdverse.org/iso2k/1_0_0/LS03HAIG.html	BK_20191230
LS03RUED	LS03RUED	LS03RUED01	LakeSediment	10.1130/G19449.1	Russell, J. M., Johnson, T. C. and Talbot, M. R.: A 725 yr cycle in the climate of central Africa during the late Holocene, Geology, 31(8), 677, doi:10.1130/g19449.1, 2003.			this compilation	-0.5	29.5	913	Edward	-72	1023	d18O	permil	carbonate	bulk carbonate	<45um calcite	lake water	The d18O, d13C, and Mg percentage in calcite are highly covariant (Fig. 2), a relationship that indicates that Mg and d18O are strongly controlled by the P/E ratio as opposed to other environmental variables (Talbot, 1990).	negative	P_E		TRUE	http://lipdverse.org/iso2k/1_0_0/LS03RUED.html	MJ
LS04JOCH	LS04JOCH	LS04JOCH01	LakeSediment	10.1016/j.quascirev.2003.06.014	Jones, V. J., Leng, M. J., Solovieva, N., Sloane, H. J. and Tarasov, P.: Holocene climate of the Kola Peninsula; evidence from the oxygen isotope record of diatom silica, Quaternary Science Reviews, 23(7-8), 833–839, doi:10.1016/j.quascirev.2003.06.014, 2004.			this compilation	67.95	32.48	475	Chuna	-7350	1940.5	d18O	permil	silica	diatom		lake water	The diatom blooms that provide the biogenic silica to the sediment occur in the summer months, June? September, when the lake is ice-free, when temperatures are highest and when rainfall is heaviest enabling nutrients to be washed in from the catchment. The d18Odiatom signal therefore reflects the climatic regime during the summer months although there will be a component of winter precipitation …	positive	P_isotope	JJA	TRUE	http://lipdverse.org/iso2k/1_0_0/LS04JOCH.html	MJ
LS04YUWA	LS04YUWA	LS04YUWA01	LakeSediment	10.1029/2003GC000652	Yuan, F., Linsley, B. K., Lund, S. P. and McGeehin, J. P.: A 1200 year record of hydrologic variability in the Sierra Nevada from sediments in Walker Lake, Nevada, Geochemistry, Geophysics, Geosystems, 5(3), doi:10.1029/2003gc000652, 2004.			https://www.ncdc.noaa.gov/paleo/study/24970	37.87	-119.16	1196	Walker Lake	544	1980	d18O	permil	carbonate	bulk carbonate	TIC	lake water	The TIC d18O derived from downcore sediments effectively parallels the anthropogenic lake-level lowering (Figure 2). The anthropogenically induced drought is recorded in downcore sediments as a 6% increase in TIC d18O. During the El Nin?o years of 1982?83 and 1997?98, Walker Lake (like Pyramid Lake) received well above average moisture. The lake volume increased by 28% from its September 1981 val…	negative	P_E		TRUE	http://lipdverse.org/iso2k/1_0_0/LS04YUWA.html	DK
LS05ANJE	LS05ANJE	LS05ANJE01	LakeSediment	10.1016/j.yqres.2005.03.005	Anderson, L., Abbott, M. B., Finney, B. P. and Burns, S. J.: Regional atmospheric circulation change in the North Pacific during the Holocene inferred from lacustrine carbonate oxygen isotopes, Yukon Territory, Canada, Quaternary Research, 64(1), 21–35, doi:10.1016/j.yqres.2005.03.005, 2005.			http://www.ncdc.noaa.gov/paleo/study/5445	60.4	-134.8	730	Jellybean	-5606	2002	d18O	permil	carbonate	bulk carbonate		lake water		positive	P_isotope	annual	TRUE	http://lipdverse.org/iso2k/1_0_0/LS05ANJE.html	MJ
LS05HOAG01	LS05HOAG	LS05HOAG01	LakeSediment	10.1016/j.yqres.2004.11.004	Hodell, D. A., Brenner, M., Curtis, J. H., Medina-Gonzalez, R., Ildefonso-Chan Can, E., Albornaz-Pat, A. and Guilderson, T. P.: Climate change on the Yucatan Peninsula during the Little Ice Age, Quaternary Research, 63(2), 109–121, doi:10.1016/j.yqres.2004.11.004, 2005.			https://www.ncdc.noaa.gov/paleo/study/6107	20.61	-89.715	10	Aguada Xcaamal	1395.5	1992.6	d18O	permil	carbonate	gastropod	Pygophorus coronatus	lake water	Variations in carbonate d18O in Aguada X?caamal were principally controlled by changes in the d18O of lake water that, in turn, reflect changes in the lake?s hydrologic budget (evaporation, precipitation, and outflow) and the d18O of incoming precipitation and groundwater	negative	I_E		TRUE	http://lipdverse.org/iso2k/1_0_0/LS05HOAG.html	MJ
LS05HOAG02	LS05HOAG	LS05HOAG01	LakeSediment	10.1016/j.yqres.2004.11.004	Hodell, D. A., Brenner, M., Curtis, J. H., Medina-Gonzalez, R., Ildefonso-Chan Can, E., Albornaz-Pat, A. and Guilderson, T. P.: Climate change on the Yucatan Peninsula during the Little Ice Age, Quaternary Research, 63(2), 109–121, doi:10.1016/j.yqres.2004.11.004, 2005.			https://www.ncdc.noaa.gov/paleo/study/6107	20.61	-89.715	10	Aguada Xcaamal	120.28	1762	d18O	permil	carbonate	gastropod		lake water	Variations in carbonate d18O in Aguada X?caamal were principally controlled by changes in the d18O of lake water that, in turn, reflect changes in the lake?s hydrologic budget (evaporation, precipitation, and outflow) and the d18O of incoming precipitation and groundwater	negative	I_E		TRUE	http://lipdverse.org/iso2k/1_0_0/LS05HOAG.html	MJ
LS05HOAG03	LS05HOAG	LS05HOAG01	LakeSediment	10.1016/j.yqres.2004.11.004	Hodell, D. A., Brenner, M., Curtis, J. H., Medina-Gonzalez, R., Ildefonso-Chan Can, E., Albornaz-Pat, A. and Guilderson, T. P.: Climate change on the Yucatan Peninsula during the Little Ice Age, Quaternary Research, 63(2), 109–121, doi:10.1016/j.yqres.2004.11.004, 2005.			https://www.ncdc.noaa.gov/paleo/study/6107	20.61	-89.715	10	Aguada Xcaamal	-2612.8	974.14	d18O	permil	carbonate	gastropod		lake water	Variations in carbonate d18O in Aguada X?caamal were principally controlled by changes in the d18O of lake water that, in turn, reflect changes in the lake?s hydrologic budget (evaporation, precipitation, and outflow) and the d18O of incoming precipitation and groundwater	negative	I_E		TRUE	http://lipdverse.org/iso2k/1_0_0/LS05HOAG.html	MJ
LS06CRLA01a	LS06CRLA	LS06CRLA01	LakeSediment	10.1007/s10933-005-4440-7	Crausbay, S. D., Russell, J. M. and Schnurrenberger, D. W.: A ca. 800-Year Lithologic Record of Drought from Sub-annually Laminated Lake Sediment, East Java, Journal of Paleolimnology, 35(3), 641–659, doi:10.1007/s10933-005-4440-7, 2006.			https://www.ncdc.noaa.gov/paleo/study/22409	-7.98	113.38	240	Lake Lamongan	1200	2004.5	d18O	permil	carbonate	carbonate	siderite, calcite and aragonite	lake water	correlation with Mg/Ca	negative	P_E		TRUE	http://lipdverse.org/iso2k/1_0_0/LS06CRLA.html	MJ
LS06DENA01b	LS06DENA	LS06DENA01	LakeSediment	10.1016/j.quascirev.2012.07.014	Dean, J. R., Jones, M. D., Leng, M. J., Sloane, H. J., Roberts, C. N., Woodbridge, J., Swann, G. E. A., Metcalfe, S. E., Eastwood, W. J. and Yigitbasıoglu, H.: Palaeo-seasonality of the last two millennia reconstructed from the oxygen isotope composition of carbonates and diatom silica from Nar Goelue, central Turkey, Quaternary Science Reviews, 66, 35–44, doi:10.1016/j.quascirev.2012.07.014, 201…			this compilation	38.34	34.46	1363	Lake Nar	291	1998.5	d18O	permil	silica	diatom		lake water	Modern lake isotope hydrology, down core changes in other proxies.	negative	P_E	MAM	TRUE	http://lipdverse.org/iso2k/1_0_0/LS06DENA.html	MJ
LS06JONA01a	LS06JONA	LS06JONA01	LakeSediment	10.1130/G22407.1	Jones, M. D., Roberts, C. N., Leng, M. J. and Tuerkes, M.: A high-resolution late Holocene lake isotope record from Turkey and links to North Atlantic and monsoon climate, Geology, 34(5), 361, doi:10.1130/g22407.1, 2006.			this compilation	38.34	34.46	1363	Lake Nar	276	2001	d18O	permil	carbonate	bulk carbonate		lake water	Modern lake isotope hydrology, climate calibration, down core changes in other proxies.	negative	P_E		TRUE	http://lipdverse.org/iso2k/1_0_0/LS06JONA.html	MJ
LS06MIBO10a	LS06MIBO	LS06MIBO01	LakeSediment	10.1016/j.quaint.2006.02.014	Mischke, S. and Wuennemann, B.: The Holocene salinity history of Bosten Lake (Xinjiang, China) inferred from ostracod species assemblages and shell chemistry: Possible palaeoclimatic implications, Quaternary International, 154-155, 100–112, doi:10.1016/j.quaint.2006.02.014, 2006.			this compilation	42.0155	87.0755	1051	Bosten Lake	-6265	1847	d18O	permil	carbonate	ostracod	Candona neglecta, Candona candida, Darwinula stevensoni	lake water	range of variability exceeds possible temperature influence; corresponding ostracod species and Mg/Ca ratios	negative	P_E		TRUE	http://lipdverse.org/iso2k/1_0_0/LS06MIBO.html	MJ
LS06POVE01a	LS06POVE	LS06POVE01	LakeSediment	10.1016/j.epsl.2005.12.024	POLISSAR, P., ABBOTT, M., SHEMESH, A., WOLFE, A. and BRADLEY, R.: Holocene hydrologic balance of tropical South America from oxygen isotopes of lake sediment opal, Venezuelan Andes, Earth and Planetary Science Letters, 242(3-4), 375–389, doi:10.1016/j.epsl.2005.12.024, 2006.			this compilation	8.85	-70.87	4170	Laguna Verde Baja	-13178.6	1835.2	d18O	permil	silica	diatom		lake water		positive	P_isotope		TRUE	http://lipdverse.org/iso2k/1_0_0/LS06POVE.html	MJ
LS06STFO	LS06STFO	LS06STFO01	LakeSediment	10.1016/j.yqres.2005.08.024	Stevens, L. R., Stone, J. R., Campbell, J. and Fritz, S. C.: A 2200-yr record of hydrologic variability from Foy Lake, Montana, USA, inferred from diatom and geochemical data, Quaternary Research, 65(02), 264–274, doi:10.1016/j.yqres.2005.08.024, 2006.			https://www.ncdc.noaa.gov/paleo/study/23080	48.2	-114.4	1006	Foy	-444.84	1992	d18O	permil	carbonate	bulk carbonate	<63um calcite and aragonite	lake water		negative	P_E		TRUE	http://lipdverse.org/iso2k/1_0_0/LS06STFO.html	MJ
LS06TIST	LS06TIST	LS06TIST01	LakeSediment	10.1029/2006GL028169	Tian, J., Nelson, D. M. and Hu, F. S.: Possible linkages of late-Holocene drought in the North American midcontinent to Pacific Decadal Oscillation and solar activity, Geophysical Research Letters, 33(23), doi:10.1029/2006gl028169, 2006.			https://www.ncdc.noaa.gov/cdo/f?p=519:1:::::P1_STUDY_ID:8647	46	-94.7	415	Steel	-1106	1999	d18O	permil	carbonate	bulk carbonate	calcite	lake water	However, two lines of evidence indicate that at Steel Lake, evaporative 18O enrichment related to aridity was the dominant control. First, the d18O values of water samples from the epilimnion and hypolimnion of Steel Lake were 8.7 and 10.7%, respectively, in July 2001 (Figure 1d). The elevated d18O value of the epilimnetic water resulted from evaporative 18O enrichment, suggesting that Steel Lake…	negative	P_E		TRUE	http://lipdverse.org/iso2k/1_0_0/LS06TIST.html	MJ
LS07ANMA	LS07ANMA	LS07ANMA01	LakeSediment	10.1016/j.quascirev.2006.04.011	Anderson, L., Abbott, M. B., Finney, B. P. and Burns, S. J.: Late Holocene moisture balance variability in the southwest Yukon Territory, Canada, Quaternary Science Reviews, 26(1-2), 130–141, doi:10.1016/j.quascirev.2006.04.011, 2007.			https://www.ncdc.noaa.gov/cdo/f?p=519:1:::::P1_STUDY_ID:6066	60.1	-133.8	749	Marcella	-2782	2000	d18O	permil	carbonate	bulk carbonate	Chara encrustations, ostracodes, gastropod and mollusk shell fragments and the <125-mm fraction of marl sediment from selected intervals of the core	lake water		negative	P_E	JJA	TRUE	http://lipdverse.org/iso2k/1_0_0/LS07ANMA.html	MJ
LS07EAGO01	LS07EAGO	LS07EAGO01	LakeSediment	10.1002/jqs.1062	Eastwood, W. J., Leng, M. J., Roberts, N. and Davis, B.: Holocene climate change in the eastern Mediterranean region: a comparison of stable isotope and pollen data from Lake Goelhisar, southwest Turkey, Journal of Quaternary Science, 22(4), 327–341, doi:10.1002/jqs.1062, 2007.			this compilation	37.12	29.6	930	Lake Golishar	-8664.3	1734	d18O	permil	carbonate	bulk carbonate	<80um	lake water	Modern isotope hydrology and downcore d18O d13C covariation.	negative	P_E		TRUE	http://lipdverse.org/iso2k/1_0_0/LS07EAGO.html	MJ
LS07LAHA	LS07LAHA	LS07LAHA01	LakeSediment	10.1177/0959683607076452	Lamb, H. F., Leng, M. J., Telford, R. J., Ayenew, T. and Umer, M.: Oxygen and carbon isotope composition of authigenic carbonate from an Ethiopian lake: a climate record of the last 2000 years, The Holocene, 17(4), 517–526, doi:10.1177/0959683607076452, 2007.			this compilation	11.35	39.72	1950	Hayq	-444	1976	d18O	permil	carbonate	bulk carbonate	<85um	lake water	Rainfall at Addis Ababa has a weighted mean 18O composition of 1.2?, while groundwater values recorded in Ethiopia range from a6.2? to a1.3? (table 2 in Lamb et al., 2000). It seems likely that the oxygen isotope values for the lake surface water (up to 9? VSMOW) result from evaporative enrichment (confirmed by the hydrological balance, Table 1), which is also represented in the high values for t…	negative	P_E		TRUE	http://lipdverse.org/iso2k/1_0_0/LS07LAHA.html	MJ
LS07ROTI	LS07ROTI	LS07ROTI01	LakeSediment	10.1177/0959683607080508	Rosqvist, G. C., Leng, M. J. and Jonsson, C.: North Atlantic region atmospheric circulation dynamics inferred from a late-Holocene lacustrine carbonate isotope record, northern Swedish Lapland, The Holocene, 17(7), 867–873, doi:10.1177/0959683607080508, 2007.			this compilation	68.3	18.7	560	Tibetanus	-680	1949	d18O	permil	carbonate	bulk carbonate	>80um	lake water	All the modern lake and groundwater isotope data lie on the Local Meteoric Water Line (LMWL) (IAEA/WMO, 2006) indicating that evaporation is not important. The similarity of the isotope composition of the lake and its different groundwater reservoirs indicate that the lake is likely to be constantly replenished by groundwater input and subterraneous outflow resulting in a short water residence ti…	positive	P_isotope	JJA	TRUE	http://lipdverse.org/iso2k/1_0_0/LS07ROTI.html	MJ
LS08LICA01a	LS08LICA	LS08LICA01a	LakeSediment	10.1007/s10933-008-9211-9	Liu, X., Sun, L., Wei, G., Wang, Y., Yan, H., Liu, K. and Wu, X.: A 1,100-year palaeoenvironmental record inferred from stable isotope and trace element compositions of ostracode and plant caryopses in sediments of Cattle Pond, Dongdao Island, South China Sea, Journal of Paleolimnology, 40(4), 987–1002, doi:10.1007/s10933-008-9211-9, 2008.			https://www.ncdc.noaa.gov/paleo/study/11197	16.65	112.717	6	Cattle Pond, Dongdao Island	1036	1886	d18O	permil	carbonate	ostracod		lake water	exclusion of other possible processes	negative	P_E		TRUE	http://lipdverse.org/iso2k/1_0_0/LS08LICA.html	MJ
LS08STCR	LS08STCR	LS08STCR01	LakeSediment	10.1016/j.quaint.2007.11.012	Stevens, L. R. and Dean, W. E.: Geochemical evidence for hydroclimatic variability over the last 2460 years from Crevice Lake in Yellowstone National Park, USA, Quaternary International, 188(1), 139–148, doi:10.1016/j.quaint.2007.11.012, 2008.			https://www.ncdc.noaa.gov/paleo/study/23081	45	-110.6	1713	Crevice	-7252	1993	d18O	permil	carbonate	bulk carbonate		lake water	Comparison of the oxygen-isotopic record with independent measures of climate suggests that the annual moisture balance is the primary isotopic control, with the seasonal timing of precipitation providing a possible secondary influence. High d18O values are associated with dry climate (e.g., evaporative enrichment of 18O) and/or wet summers relative to winters (higher d18O values of atmospheric p…	negative	P_E		TRUE	http://lipdverse.org/iso2k/1_0_0/LS08STCR.html	MJ
LS09LACA	LS09LACA	LS09LACA	LakeSediment	10.1016/j.quascirev.2009.04.013	Lane, C. S., Horn, S. P., Mora, C. I. and Orvis, K. H.: Late-Holocene paleoenvironmental change at mid-elevation on the Caribbean slope of the Cordillera Central, Dominican Republic: a multi-site, multi-proxy analysis, Quaternary Science Reviews, 28(23-24), 2239–2260, doi:10.1016/j.quascirev.2009.04.013, 2009.			https://www.ncdc.noaa.gov/paleo/study/23095	18.7975	-70.8758	976	Laguna Castilla	460.787	1825.66	d18O	permil	carbonate	ostracod	also charophyte oospores	lake water	The oxygen isotope composition of ostracod carapaces depends primarily on the d18O composition of the water and the tempera- ture at which carbonates precipitate (Craig, 1965; Stuiver, 1970). In tropical, closed-basin lakes within seasonally dry climates, the d18O value of lake water is controlled primarily by the evaporation to precipitation ratio (E/P) of the lake (Fontes and Gonfiantini, 1967;…	negative	P_E		TRUE	http://lipdverse.org/iso2kv0_10_0/LS09LACA.html	MJ
LS09LAEL	LS09LAEL	LS09LAEL	LakeSediment	10.1016/j.quascirev.2009.04.014	Hodgson, D. A., Roberts, S. J., Bentley, M. J., Carmichael, E. L., Smith, J. A., Verleyen, E., Vyverman, W., Geissler, P., Leng, M. J. and Sanderson, D. C. W.: Exploring former subglacial Hodgson Lake, Antarctica. Paper II: palaeolimnology, Quaternary Science Reviews, 28(23-24), 2310–2325, doi:10.1016/j.quascirev.2009.04.014, 2009.			this compilation	18.7958	-70.8869	990	Laguna de Salvador	1592.5	1836.99	d18O	permil	carbonate	ostracod	also charophyte oospores	lake water	The oxygen isotope composition of ostracod carapaces depends primarily on the d18O composition of the water and the tempera- ture at which carbonates precipitate (Craig, 1965; Stuiver, 1970). In tropical, closed-basin lakes within seasonally dry climates, the d18O value of lake water is controlled primarily by the evaporation to precipitation ratio (E/P) of the lake (Fontes and Gonfiantini, 1967;…	negative	P_E		TRUE	http://lipdverse.org/iso2k/1_0_0/LS09LAEL.html	MJ
LS09MAAS	LS09MAAS	LS09MAAS01	LakeSediment	10.1016/j.palaeo.2009.05.003	Marshall, M. H., Lamb, H. F., Davies, S. J., Leng, M. J., Kubsa, Z., Umer, M. and Bryant, C.: Climatic change in northern Ethiopia during the past 17,000 years: A diatom and stable isotope record from Lake Ashenge, Palaeogeography, Palaeoclimatology, Palaeoecology, 279(1-2), 114–127, doi:10.1016/j.palaeo.2009.05.003, 2009.			this compilation	12.5833	39.4833	2440	Ashenge	-15595	1950	d18O	permil	carbonate	bulk carbonate	<85um	lake water	Where water loss is mainly through evaporation as is likely for Lake Ashenge, the waters tend to have a variable and elevated oxygen isotope composition relative to regional rainfall (which tends to be negative). Measured d18Ocarb values are always higher than those of ambient precipitation as the lighter isotope 16O is preferentially lost to evaporation (Leng et al.,2006)...The isotope records f…	negative	P_E		TRUE	http://lipdverse.org/iso2k/1_0_0/LS09MAAS.html	MJ
LS09MAZO	LS09MAZO	LS09MAZO01	LakeSediment	10.1016/j.yqres.2008.10.004	Martin-Puertas, C., Valero-Garces, B. L., Brauer, A., Mata, M. P., Delgado-Huertas, A. and Dulski, P.: The Iberian–Roman Humid Period (2600–1600 cal yr BP) in the Zonar Lake varve record (Andalucia, southern Spain), Quaternary Research, 71(2), 108–120, doi:10.1016/j.yqres.2008.10.004, 2009.			this compilation	37.48	-4.68	300	Zonar	-561	349	d18O	permil	carbonate	bulk carbonate	calcite layers	lake water	However, the continuous enrichment of 18O, due to evaporation, during spring and summer results in heavier isotope values at the end of the warm seasons. Consequently, the isotopic oscillations can be interpreted as a reflection of changes in the intensity of the evaporation processes (Li and Ku,1997) that cancel out the opposite effect of the temperature increase (decreasing isotopic fractionati…	negative	I_E		TRUE	http://lipdverse.org/iso2k/1_0_0/LS09MAZO.html	BM, ZK
LS09MIKU01a	LS09MIKU	LS09MIKU01	LakeSediment	10.1002/jqs.1288	Mischke, S., Zhang, C., Boerner, A. and Herzschuh, U.: Lateglacial and Holocene variation in aeolian sediment flux over the northeastern Tibetan Plateau recorded by laminated sediments of a saline meromictic lake, Journal of Quaternary Science, 25(2), 162–177, doi:10.1002/jqs.1288, 2010.			this compilation	35.3	99.17	4150	Lake Kuhai	-13007	1876	d18O	permil	carbonate	ostracod	Eucypris mareotica	lake water	Support from grain size analysis; mineralogy	negative	P_E		TRUE	http://lipdverse.org/iso2k/1_0_0/LS09MIKU.html	MJ
LPD292174f8	LS09SASP	LS09SASP01	LakeSediment	10.1038/NGEO554	Sachs, J. P., Sachse, D., Smittenberg, R. H., Zhang, Z., Battisti, D. S. and Golubic, S.: Southward movement of the Pacific intertropical convergence zone AD 1400–1850, Nature Geoscience, 2(7), 519–525, doi:10.1038/ngeo554, 2009.			https://www.ncdc.noaa.gov/paleo/study/29432	7.15	134.367	4	Spooky Lake	1521	1994	d2H	permil	aquatic biomarker	dinosterol		lake water		negative	I_E		TRUE	http://lipdverse.org/iso2k/1_0_0/LS09SASP.html	ET
LS09SAWA01A	LS09SAWA	LS09SAWA01	LakeSediment	10.1038/NGEO554	Sachs, J. P., Sachse, D., Smittenberg, R. H., Zhang, Z., Battisti, D. S. and Golubic, S.: Southward movement of the Pacific intertropical convergence zone AD 1400–1850, Nature Geoscience, 2(7), 519–525, doi:10.1038/ngeo554, 2009.			https://www.ncdc.noaa.gov/paleo/study/29432	4.7167	-160.417	4	Washington Lake	1050	1643	d2H	permil	aquatic biomarker	total lipid extract		lake water	Sachs and Sachse 2008, GCA , 72:793-806; "dD values of lipids...were closely correlated with salinity, owing to a decrease in D/H fractionation between lipids and source water as salinity increases. TLE dD values can therefore be used as a salinity indicator in hypersaline evnrionments such as those at Christmas Island".	positive	P_E	annual	TRUE	http://lipdverse.org/iso2k/1_0_0/LS09SAWA.html	ET
LS09SCMI	LS09SCMI	LS09SCMI01	LakeSediment	10.1007/s10933-008-9261-z	Schiff, C. J., Kaufman, D. S., Wolfe, A. P., Dodd, J. and Sharp, Z.: Late Holocene storm-trajectory changes inferred from the oxygen isotope composition of lake diatoms, south Alaska, Journal of Paleolimnology, 41(1), 189–208, doi:10.1007/s10933-008-9261-z, 2008.			https://www.ncdc.noaa.gov/paleo/study/6202	60.95	-148.15	3	Mica	-7554	1994	d18O	permil	silica	diatom		lake water	Shifts of d18Odiatom values are likely not related to changes in diatom taxa or dissolution effects. Modern lake water falls along meteoric water line for the region	positive	P_isotope	DJF	TRUE	http://lipdverse.org/iso2k/1_0_0/LS09SCMI.html	MJ
LS09SHJO	LS09SHJO	LS09SHJO01	LakeSediment	10.1177/0959683609104029	Shapley, M. D., Ito, E. and Donovan, J. J.: Lateglacial and Holocene hydroclimate inferred from a groundwater flow-through lake, Northern Rocky Mountains, USA, The Holocene, 19(4), 523–535, doi:10.1177/0959683609104029, 2009.			https://www.ncdc.noaa.gov/paleo/study/23076	47.0457	-113.143	1200	Jones	-10744	1963.3	d18O	permil	carbonate	carbonate	<125um fraction	lake water	The persistent dominance of endogenic carbonate minerals requires a dynamic balance between groundwater inflow, evaporative concentration and groundwater outflow. "Fluid balance"In groundwater-dominated lakes, sediment geochemistry becomes closely linked to changes in lake?groundwater exchange and groundwater recharge at all timescales.	negative	I_E		TRUE	http://lipdverse.org/iso2k/1_0_0/LS09SHJO.html	DK
LS10ANBL01a	LS10ANBL	LS10ANBL01	LakeSediment	10.1002/jqs.1415	Andersson, S., Rosqvist, G., leng, M. j., Wastegard, S. and Blaauw, M.: Late Holocene climate change in central Sweden inferred from lacustrine stable isotope data, Journal of Quaternary Science, 25(8), 1305–1316, doi:10.1002/jqs.1415, 2010.			this compilation	62	14.65	330	Lake Blektjarnen	-2435.51	2010	d18O	permil	carbonate	mollusk	and algal crusts	lake water	Comparison with lake water, similar trend in both species analysed	negative	I_E		TRUE	http://lipdverse.org/iso2k/1_0_0/LS10ANBL.html	MJ
LS10CLTA	LS10CLTA	LS10CLTA01	LakeSediment	10.1016/j.quascirev.2009.12.009	Clegg, B. F. and Hu, F. S.: An oxygen-isotope record of Holocene climate change in the south-central Brooks Range, Alaska, Quaternary Science Reviews, 29(7-8), 928–939, doi:10.1016/j.quascirev.2009.12.009, 2010.			https://www.ncdc.noaa.gov/cdo/f?p=519:1:::::P1_STUDY_ID:8663	67.35	-153.67	275	Takahula	-6157	2002	d18O	permil	carbonate	chara encrustations		lake water	These exceptionally low values suggest that factors other than effective moisture must have contributed to the pronounced variations in the Takahula Lake d18O record. Increased winter precipitation associated with a westerly Aleutian Low position may account for 1 permil of the d18O decrease. Other factors leading to the 18O-depletion during these periods probably include decreased temperatures, …	negative	P_E	DJF	TRUE	http://lipdverse.org/iso2k/1_0_0/LS10CLTA.html	MJ
LS10GOBL01a	LS10GOBL	LS10GOBL01	LakeSediment	10.1016/j.palaeo.2010.08.005	Gouramanis, C., Wilkins, D. and De Deckker, P.: 6000years of environmental changes recorded in Blue Lake, South Australia, based on ostracod ecology and valve chemistry, Palaeogeography, Palaeoclimatology, Palaeoecology, 297(1), 223–237, doi:10.1016/j.palaeo.2010.08.005, 2010.			https://www.ncdc.noaa.gov/paleo/study/22411	-37.01	140.01	24	Blue Lake, Mount Gambier	-3363.96	1950	d18O	permil	carbonate	ostracod	G. australica	lake water	The d18Onorm record of ostracod valves preserved in Blue Lake reflects a history of evaporative enrichment and fluctuating groundwa- ter recharge.	negative	P_E	DJF	TRUE	http://lipdverse.org/iso2k/1_0_0/LS10GOBL.html	MJ
LS10HEQI01a	LS10HEQI	LS10HEQI01	LakeSediment	10.1360/02wd0272	A.C.G., H.: A carbon- and oxygen-isotope record of recent environmental change from Qinghai Lake, NE Tibetan Plateau, Chinese Science Bulletin, 48(14), 1463, doi:10.1360/02wd0272, 2003.			this compilation	37	100	3193	Qinghai	466.27	1999.28	d18O	permil	carbonate	bulk carbonate	calcite <63Aum	lake water	Comparison between d18O-calcite and instrumental lake levels	negative	P_E		TRUE	http://lipdverse.org/iso2k/1_0_0/LS10HEQI.html	MJ
LS10HESA	LS10HESA	LS10HESA01	LakeSediment	10.1016/j.quascirev.2010.05.010	Heikkilae, M., Edwards, T. W. D., Seppae, H. and Sonninen, E.: Sediment isotope tracers from Lake Saarikko, Finland, and implications for Holocene hydroclimatology, Quaternary Science Reviews, 29(17-18), 2146–2160, doi:10.1016/j.quascirev.2010.05.010, 2010.			this compilation	62.25	27.67	97.5	Saarikko	-7930	1822	d18O	permil	cellulose	cellulose		lake water	The lake was probably hydrologically closed until ?800 cal yr BP, but experienced higher lake levels ?9000e7500 and ?3300e800 cal yr BP and low lake levels during the intervening times	negative	I_E		TRUE	http://lipdverse.org/iso2k/1_0_0/LS10HESA.html	MJ
LS10HOLO	LS10HOLO	LS10HOLO01	LakeSediment	10.1177/0959683610369504	Holmes, J., Arrowsmith, C., Austin, W., Boyle, J., Fisher, E., Holme, R., Marshall, J., Oldfield, F. and van der Post, K.: Climate and atmospheric circulation changes over the past 1000 years reconstructed from oxygen isotopes in lake-sediment carbonate from Ireland, The Holocene, 20(7), 1105–1111, doi:10.1177/0959683610369504, 2010.			http://www1.ncdc.noaa.gov/pub/data/paleo/paleolimnology/europe/uk/lough-na-shade2010.txt	54.35	-6.69	44	Lough-na-Shade	958.3	1940.3	d18O	permil	carbonate	ostracod	Candona candida, Candona neglecta	lake water		positive	P_isotope		TRUE	http://lipdverse.org/iso2k/1_0_0/LS10HOLO.html	MJ
LS10STSP	LS10STSP	LS10STSP01	LakeSediment	10.1111/j.1502-3885.2010.00169.x	ST. AMOUR, N. A., HAMMARLUND, D., EDWARDS, T. W. D. and WOLFE, B. B.: New insights into Holocene atmospheric circulation dynamics in central Scandinavia inferred from oxygen-isotope records of lake-sediment cellulose, Boreas, 39(4), 770–782, doi:10.1111/j.1502-3885.2010.00169.x, 2010.			https://www.ncdc.noaa.gov/paleo-search/study/15444	63.12	12.32	887	Lake Spaime	-7453.31	1903.38	d18O	permil	cellulose	cellulose		lake water	Data from surface waters sampled in the area (Fig. 3B) reveal evaporative enrichment in some lakes consistent with the predicted LEL, whereas data from Lake Spa? ime are strictly constrained to the LMWL, with an average composition identical to that of local groundwater.	positive	P_isotope		TRUE	http://lipdverse.org/iso2k/1_0_0/LS10STSP.html	MJ
LS10WRNA01a	LS10WRNA	LS10WRNA01	LakeSediment	10.1016/j.quaint.2008.12.010	Wrozyna, C., Frenzel, P., Steeb, P., Zhu, L., van Geldern, R., Mackensen, A. and Schwalb, A.: Stable isotope and ostracode species assemblage evidence for lake level changes of Nam Co, southern Tibet, during the past 600years, Quaternary International, 212(1), 2–13, doi:10.1016/j.quaint.2008.12.010, 2010.			this compilation	30.7252	90.6066	4718	Nam Co	1456	2000	d18O	permil	carbonate	ostracod	L. sinensis	lake water	(Holmes, 1996; Schwalb, 2003; Holmes et al., 2007).	negative	I_E		TRUE	http://lipdverse.org/iso2k/1_0_0/LS10WRNA.html	MJ
LS10ZHHU01a	LS10ZHHU	LS10ZHHU01	LakeSediment	10.1007/s10933-010-9469-6	Zhao, C., Yu, Z., Zhao, Y., Ito, E., Kodama, K. P. and Chen, F.: Holocene millennial-scale climate variations documented by multiple lake-level proxies in sediment cores from Hurleg Lake, Northwest China, Journal of Paleolimnology, 44(4), 995–1008, doi:10.1007/s10933-010-9469-6, 2010.			this compilation	37.2908	96.8838	2817	Hurleg Lake	-15659.1	2001.6	d18O	permil	carbonate	ostracod	and mollusk	lake water		negative	I_E		TRUE	http://lipdverse.org/iso2k/1_0_0/LS10ZHHU.html	MJ
LS11ANSE	LS11ANSE	LS11ANSE01	LakeSediment	10.1016/j.quascirev.2011.01.005	Anderson, L., Finney, B. P. and Shapley, M. D.: Lake carbonate-δ18O records from the Yukon Territory, Canada: Little Ice Age moisture variability and patterns, Quaternary Science Reviews, 30(7-8), 887–898, doi:10.1016/j.quascirev.2011.01.005, 2011.			https://www.ncdc.noaa.gov/paleo/study/10750	62.2	-136.4	520	Seven mile	988	1983	d18O	permil	carbonate	bulk carbonate	< 32 um	lake water	Recent observations of lake-water d18O, lake level, river discharge, and climate variations, suggest that changes in regional effective moisture (precipitation minus evaporation) are reflected by the lakes hydrologic balance. The observations indicate that the lake is currently 18O-enriched by summer evaporation and that during years of increased precipitation, when groundwater inflow rates to th…	negative	P_E	JJA	TRUE	http://lipdverse.org/iso2k/1_0_0/LS11ANSE.html	MJ
LS11BACH	LS11BACH	LS11BACH01	LakeSediment	10.1130/G32419.1	Barker, P. A., Hurrell, E. R., Leng, M. J., Wolff, C., Cocquyt, C., Sloane, H. J. and Verschuren, D.: Seasonality in equatorial climate over the past 25 k.y. revealed by oxygen isotope records from Mount Kilimanjaro, Geology, 39(12), 1111–1114, doi:10.1130/g32419.1, 2011.			this compilation	3.32	37.7	880	Challa	-22842	1676	d18O	permil	silica	diatom		lake water	Therefore, the Challa ?18Odiatom record is tuned to the underlying processes of local precipitation and, especially, seasonal evaporative losses from the lake surface, only modifi ed by small temperature effects.	negative	P_E		TRUE	http://lipdverse.org/iso2k/1_0_0/LS11BACH.html	MJ
LS11BIPU01a	LS11BIPU	LS11BIPU01	LakeSediment	10.1016/j.epsl.2011.08.040	Bird, B. W., Abbott, M. B., Rodbell, D. T. and Vuille, M.: Holocene tropical South American hydroclimate revealed from a decadally resolved lake sediment δ18O record, Earth and Planetary Science Letters, 310(3-4), 192–202, doi:10.1016/j.epsl.2011.08.040, 2011.			https://www.ncdc.noaa.gov/paleo/study/12199	-10.7	-76.06	4300	Laguna Pumacocha	-277.39	2007	d18O	permil	carbonate	bulk carbonate	<63 um	lake water	exclusion of all other possible influencing processes (see Bird et al. 2011)	positive	P_isotope		TRUE	http://lipdverse.org/iso2k/1_0_0/LS11BIPU.html	MJ
LS11KOMA01A	LS11KOMA	LS11KOMA01	LakeSediment	10.1016/j.epsl.2011.10.020	Konecky, B. L., Russell, J. M., Johnson, T. C., Brown, E. T., Berke, M. A., Werne, J. P. and Huang, Y.: Atmospheric circulation patterns during late Pleistocene climate changes at Lake Malawi, Africa, Earth and Planetary Science Letters, 312(3-4), 318–326, doi:10.1016/j.epsl.2011.10.020, 2011.			this compilation	-10.0183	34.1878	477	Lake Malawi	-25	1854	d2H	permil	terrestrial biomarker	n-alkanoic acid	C28	soil water	Leaf wax dD reflects "...variations in the ?D of precipitation (?Dprecip) through time in many systems (Hou et al., 2008; Huang et al., 2004). Observational data and isotope-enabled climate models indicate that ?Dprecip reflects the integrated atmospheric history of a water parcel, including source region, transport history, and convective, evaporative, and distillation processes." / "The Lake Ma…	positive	P_isotope	annual	TRUE	http://lipdverse.org/iso2k/1_0_0/LS11KOMA.html	ET
LS11MOES	LS11MOES	LS11MOES01	LakeSediment	10.1007/s10933-009-9346-3	Morellon, M., Valero-Garces, B., Gonzalez-Samperiz, P., Vegas-Vilarrubia, T., Rubio, E., Rieradevall, M., Delgado-Huertas, A., Mata, P., Romero, O., Engstrom, D. R., Lopez-Vicente, M., Navas, A. and Soto, J.: Climate changes and human activities recorded in the sediments of Lake Estanya (NE Spain) during the Medieval Warm Period and Little Ice Age, Journal of Paleolimnology, 46(3), 423–452, doi:1…			this compilation	42.03	0.53	670	Estanya	1146.19	1995.21	d18O	permil	carbonate	bulk carbonate	including inwashed catchment carbonate	lake water	The isotopic composition of the Triassic limestone bedrock is characterized by relatively low oxygen isotope values (between -4.0 and -6.0%; average d18Ocalcite = -5.3%)...samples from units 6, 5 and 3 show d18Ocalcite values (-7.1% to -3.2%) similar to the isotopic signal of the bedrock (-4.6% to -5.2%), indicating a dominant clastic origin of the carbonate.	negative	P_E		TRUE	http://lipdverse.org/iso2k/1_0_0/LS11MOES.html	MJ
LS11NECA	LS11NECA	LS11NECA01	LakeSediment	10.1073/pnas.1009194108	Nelson, D. B., Abbott, M. B., Steinman, B., Polissar, P. J., Stansell, N. D., Ortiz, J. D., Rosenmeier, M. F., Finney, B. P. and Riedel, J.: Drought variability in the Pacific Northwest from a 6,000-yr lake sediment record, Proceedings of the National Academy of Sciences, 108(10), 3870–3875, doi:10.1073/pnas.1009194108, 2011.			https://www.ncdc.noaa.gov/paleo/study/10310	48.5	-119.6	594	Castor	-4079.01	1998	d18O	permil	carbonate	bulk carbonate		lake water	Castor Lake water and sediment oxygen isotope values are primarily influenced by catchment water balance variations resulting from precipitation-evaporation forcing; To establish a meteoric water baseline for the Castor Lake record, we mean centered the independently dated (SI Appendix, Table S1) Lime Lake ?18O data and subtracted these variations from the mean centered Castor Lake ?18O values (F…	negative	P_E	DJF	TRUE	http://lipdverse.org/iso2k/1_0_0/LS11NECA.html	MJ
LS11RYKA	LS11RYKA	LS11RYKA01	LakeSediment	10.1016/j.quascirev.2010.11.011	Ryves, D. B., Mills, K., Bennike, O., Brodersen, K. P., Lamb, A. L., Leng, M. J., Russell, J. M. and Ssemmanda, I.: Environmental change over the last millennium recorded in two contrasting crater lakes in western Uganda, eastern Africa (Lakes Kasenda and Wandakara), Quaternary Science Reviews, 30(5-6), 555–569, doi:10.1016/j.quascirev.2010.11.011, 2011.			this compilation	0.4333	30.28	1260	Kasenda	756.14	1999.5	d18O	permil	carbonate	bulk carbonate	<65um	lake water	a negative excursion in the d18Ocarb profiles suggests reduced evaporative concentration of lake water. Although it is not straightforward to compare carbonate with water d18O values, d18O values are more similar to groundwater (c. 2&; K. Mills & J.M. Russell, unpubl. data), in contrast to current lake water values indicating net evaporation (values between A¾2 and A¾4&; K. Mills & J.M. Russell, …	negative	I_E		TRUE	http://lipdverse.org/iso2k/1_0_0/LS11RYKA.html	MJ
LS11TICH01A	LS11TICH	LS11TICH01	LakeSediment	10.1016/j.quascirev.2011.01.017	Tierney, J. E., Russell, J. M., Sinninghe Damste, J. S., Huang, Y. and Verschuren, D.: Late Quaternary behavior of the East African monsoon and the importance of the Congo Air Boundary, Quaternary Science Reviews, 30(7-8), 798–807, doi:10.1016/j.quascirev.2011.01.017, 2011.			https://www.ncdc.noaa.gov/paleo/study/10889	-3.3167	37.7	880	Lake Challa	-22972	1980	d2H	permil	terrestrial biomarker	n-alkanoic acid	C28	soil water	Vegetation and humidity effects are negligble, "Thus, we assume in this study that dDwax represents mean annual dDP." ... "Instrumental measurements of the isotopic composition of East African precipitation are correlated with 850 hPa zonal wind speeds in the central Indian Ocean (5 Ne5 S, 60 Ee90 E), with stronger zonal wind speed resulting in more depleted precipitation (Vuille et al., 2005). I…	positive	P_isotope	annual	TRUE	http://lipdverse.org/iso2k/1_0_0/LS11TICH.html	ET
LS12ANBI	LS12ANBI	LS12ANBI01	LakeSediment	10.1016/j.gloplacha.2012.05.012	Anderson, L.: Rocky Mountain hydroclimate: Holocene variability and the role of insolation, ENSO, and the North American Monsoon, Global and Planetary Change, 92-93, 198–208, doi:10.1016/j.gloplacha.2012.05.012, 2012.			https://www.ncdc.noaa.gov/paleo/study/13120	39.8	-107.3	3255	Bison	-8340	2008	d18O	permil	carbonate	bulk carbonate	<32um	lake water	Drought periods (i.e., drier winters and/or a more rain-dominated seasonal precipitation balance) generally correspond with higher calcite d18O values, and vice-versa;although lake-water values are currently observed to change through the ice-free season from ?16.7? to ?13.5? (n= 10), the late summer values are artificially elevated (inset of Fig. 3.).The lower, early summer values are similar to…	positive	P_isotope		TRUE	http://lipdverse.org/iso2k/1_0_0/LS12ANBI.html	MJ
LS12ANYE	LS12ANYE	LS12ANYE01	LakeSediment	10.1016/j.gloplacha.2012.05.012	Anderson, L.: Rocky Mountain hydroclimate: Holocene variability and the role of insolation, ENSO, and the North American Monsoon, Global and Planetary Change, 92-93, 198–208, doi:10.1016/j.gloplacha.2012.05.012, 2012.			https://www.ncdc.noaa.gov/paleo/study/13120	39.7	-107.4	3170	Yellow	-6205	2006	d18O	permil	carbonate	bulk carbonate	<32um	lake water	Drought periods (i.e., drier winters and/or a more rain-dominated seasonal precipitation balance) generally correspond with higher calcite d18O values, and vice-versa;although lake-water values are currently observed to change through the ice-free season from ?16.7? to ?13.5? (n= 10), the late summer values are artificially elevated (inset of Fig. 3.). The lower, early summer values are similar t…	negative	P_E		TRUE	http://lipdverse.org/iso2k/1_0_0/LS12ANYE.html	MJ
LS12GOBA01a	LS12GOBA	LS12GOBA01	LakeSediment	10.1016/j.quascirev.2012.05.007	Gouramanis, C., Dodson, J., Wilkins, D., De Deckker, P. and Chase, B. M.: Holocene palaeoclimate and sea level fluctuation recorded from the coastal Barker Swamp, Rottnest Island, south-western Western Australia, Quaternary Science Reviews, 54, 40–57, doi:10.1016/j.quascirev.2012.05.007, 2012.			this compilation	-32.001	115.51	0	Barker Swamp	-5480.83	1815.6	d18O	permil	carbonate	ostracod		lake water	The rates of change of enrichment and depletion of both d18O and d13C (with respect to VPDB) are rapid, indicating large and rapid changes in the lake water due to variations in E/P.	negative	P_E		TRUE	http://lipdverse.org/iso2k/1_0_0/LS12GOBA.html	MJ
LS12KENO01a	LS12KENO	LS12KENO01	LakeSediment	10.1016/j.yqres.2011.09.013	Kemp, J., Radke, L. C., Olley, J., Juggins, S. and De Deckker, P.: Holocene lake salinity changes in the Wimmera, southeastern Australia, provide evidence for millennial-scale climate variability, Quaternary Research, 77(1), 65–76, doi:10.1016/j.yqres.2011.09.013, 2012.			https://www.ncdc.noaa.gov/paleo/study/22414	-36.8	141.8	132	Northwest Jacka Lake	-2436.79	1550.65	d18O	permil	carbonate	ostracod	and some forams	lake water	Comparison with salinity reconstruction	negative	P_E		TRUE	http://lipdverse.org/iso2k/1_0_0/LS12KENO.html	MJ
LS12STLI	LS12STLI	LS12STLI01	LakeSediment	10.1073/pnas.1201083109	Steinman, B. A., Abbott, M. B., Mann, M. E., Stansell, N. D. and Finney, B. P.: 1,500 year quantitative reconstruction of winter precipitation in the Pacific Northwest, Proceedings of the National Academy of Sciences, 109(29), 11619–11623, doi:10.1073/pnas.1201083109, 2012.			https://www.ncdc.noaa.gov/cdo/f?p=519:1:0::::P1_STUDY_ID:13174	48.9	-117.3	780	Lime	500	2000	d18O	permil	carbonate	bulk carbonate		lake water	Lime Lake d18O values, however, are controlled by the isotopic composition of meteoric water (i.e., rain and snowfall), which is influenced by the origin of atmospheric moisture, air mass trajectory, Rayleigh distillation, and air temperature	positive	P_isotope	DJF	TRUE	http://lipdverse.org/iso2k/1_0_0/LS12STLI.html	MJ
LS12STRE	LS12STRE	LS12STRE01	LakeSediment	10.1073/pnas.1201083109	Steinman, B. A., Abbott, M. B., Mann, M. E., Stansell, N. D. and Finney, B. P.: 1,500 year quantitative reconstruction of winter precipitation in the Pacific Northwest, Proceedings of the National Academy of Sciences, 109(29), 11619–11623, doi:10.1073/pnas.1201083109, 2012.			https://www.ncdc.noaa.gov/cdo/f?p=519:1:0::::P1_STUDY_ID:13174	48.8	-118.2	754	Renner	500	2000	d18O	permil	carbonate	bulk carbonate		lake water	We interpret the Renner-Lime Lake ??18O record as a proxy for winter precipitation amounts. Note that the Renner- Lake ??18O dataset was produced by mean centering the two records and subtracting the latter from the former (i.e., the same method used to produce the Castor-Lime Lake ??18O dataset).	negative	P_E	DJF	TRUE	http://lipdverse.org/iso2k/1_0_0/LS12STRE.html	MJ
LS12THAY01C	LS12THAY	LS12THAY01	LakeSediment	10.1007/s10933-012-9584-7	Thomas, E. K., McGrane, S., Briner, J. P. and Huang, Y.: Leaf wax δ2H and varve-thickness climate proxies from proglacial lake sediments, Baffin Island, Arctic Canada, Journal of Paleolimnology, 48(1), 193–207, doi:10.1007/s10933-012-9584-7, 2012.			https://www.ncdc.noaa.gov/paleo/study/13114	70.459	-70.086	68	Ayr Lake	1451	2003.5	d2H	permil	terrestrial biomarker	n-alkanoic acid	C26	soil water	The major source of water for plants in the Arctic, where permafrost precludes extensive groundwater systems, is precipitation, either as snowmelt or summer rain (Elberling et al. 2008). Thus, we hypothesize that d2Hwax in the Arctic is likely closely related to d2Hprecip. Leaf wax synthesis occurs during the summer months when plants are neither temper- ature- nor light-limited. The apparent fra…	positive	P_isotope	JJA	TRUE	http://lipdverse.org/iso2k/1_0_0/LS12THAY.html	ET
LS12WOQU	LS12WOQU	LS12WOQU01	LakeSediment	10.1007/s10933-012-9610-9	Wooller, M. J., Kurek, J., Gaglioti, B. V., Cwynar, L. C., Bigelow, N., Reuther, J. D., Gelvin-Reymiller, C. and Smol, J. P.: An ~11,200 year paleolimnological perspective for emerging archaeological findings at Quartz Lake, Alaska, Journal of Paleolimnology, 48(1), 83–99, doi:10.1007/s10933-012-9610-9, 2012.			https://www.ncdc.noaa.gov/paleo/study/13079	64.21	-145.82	293	Quartz Lake	-8472	1171	d18O	permil	carbonate	mollusk	pisidiidae fragments	lake water	Subsequent to*3,000 cal yr BP, Quartz Lake became a relatively closed system, with isotopic characteristics of progressively stronger evaporative influence	negative	P_E	JJA	TRUE	http://lipdverse.org/iso2k/1_0_0/LS12WOQU.html	MJ
LS13BAFL01D	LS13BAFL	LS13BAFL01	LakeSediment	10.1177/0959683613493938	Balascio, N. L., D’Andrea, W. J., Bradley, R. S. and Perren, B. B.: Biogeochemical evidence for hydrologic changes during the Holocene in a lake sediment record from southeast Greenland, The Holocene, 23(10), 1428–1439, doi:10.1177/0959683613493938, 2013.			https://www.ncdc.noaa.gov/paleo/study/14513	65.6107	-37.6935	73	Flower Valley Lake	-6610	1642	d2H	permil	terrestrial biomarker	n-alkane	C31	soil water	Winter snow melting during growing season. "dD values of long-chain n-alkanes (dDwax) reflect dD of water used by terrestrial vegetation after modification by biosynthetic processes (Sachse et al., 2012 and references therein). Soil moisture provides the source water for terrestrial plants, while lake water is the source for aquatic macrophytes and algae. dD of water in soils can be modified to s…	positive	P_isotope	DJF	TRUE	http://lipdverse.org/iso2k/1_0_0/LS13BAFL.html	ET
LS13BAFL01B	LS13BAFL	LS13BAFL01	LakeSediment	10.1177/0959683613493938	Balascio, N. L., D’Andrea, W. J., Bradley, R. S. and Perren, B. B.: Biogeochemical evidence for hydrologic changes during the Holocene in a lake sediment record from southeast Greenland, The Holocene, 23(10), 1428–1439, doi:10.1177/0959683613493938, 2013.			https://www.ncdc.noaa.gov/paleo/study/14513	65.6107	-37.6935	73	Flower Valley Lake	-6610	1642	d2H	permil	aquatic biomarker	n-alkane	C27	lake water	dD values of long-chain n-alkanes (dDwax) reflect dD of water used by terrestrial vegetation after modification by biosynthetic processes (Sachse et al., 2012 and references therein). Soil mois- ture provides the source water for terrestrial plants, while lake water is the source for aquatic macrophytes and algae. dD of water in soils can be modified to some extent from dD of annual precipitation…	negative	I_E	DJF	TRUE	http://lipdverse.org/iso2k/1_0_0/LS13BAFL.html	ET
LS13BAFL01C	LS13BAFL	LS13BAFL01	LakeSediment	10.1177/0959683613493938	Balascio, N. L., D’Andrea, W. J., Bradley, R. S. and Perren, B. B.: Biogeochemical evidence for hydrologic changes during the Holocene in a lake sediment record from southeast Greenland, The Holocene, 23(10), 1428–1439, doi:10.1177/0959683613493938, 2013.			https://www.ncdc.noaa.gov/paleo/study/14513	65.6107	-37.6935	73	Flower Valley Lake	-6610	1642	d2H	permil	terrestrial biomarker	n-alkane	C29	soil water	dD values of long-chain n-alkanes (dDwax) reflect dD of water used by terrestrial vegetation after modification by biosynthetic processes (Sachse et al., 2012 and references therein). Soil moisture provides the source water for terrestrial plants, while lake water is the source for aquatic macrophytes and algae. dD of water in soils can be modified to some extent from dD of annual precipitation b…	positive	P_isotope	DJF	TRUE	http://lipdverse.org/iso2k/1_0_0/LS13BAFL.html	ET
LS13KOLA01A	LS13KOLA	LS13KOLA01	LakeSediment	10.1029/2012gl054331	Konecky, B. L., Russell, J. M., Rodysill, J. R., Vuille, M., Bijaksana, S. and Huang, Y.: Intensification of southwestern Indonesian rainfall over the past millennium, Geophysical Research Letters, 40(2), 386–391, doi:10.1029/2012gl054331, 2013.			https://www.ncdc.noaa.gov/paleo/study/14129	-8.0089	113.313	331	Lake Lading	851.9	2000.2	d2H	permil	terrestrial biomarker	n-alkanoic acid	C28	soil water	Because plant waxes are produced year-round, we interpret dDwax to record weighted annual dDprecip, which is highly influenced by variations in the Australasian monsoon.	positive	P_isotope	annual	TRUE	http://lipdverse.org/iso2k/1_0_0/LS13KOLA.html	ET
LS13LUBA01a	LS13LUBA	LS13LUBA01a	LakeSediment	10.1007/s12665-012-1899-1	Lu, Y., An, C., Wang, Z., Zhao, J., Wei, H., Tao, S., Huang, W. and Ma, M.: Mid-Holocene climate change in the eastern Xinjiang region indicated by the grain size and stable isotope record from Lake Barkol, northwest China, Environmental Earth Sciences, 68(8), 2163–2169, doi:10.1007/s12665-012-1899-1, 2012.			this compilation	43.6375	92.8142	1583	Barkol	-6744	1553	d18O	permil	carbonate	bulk carbonate	less than 80 um	lake water	d18O values only	negative	P_E		TRUE	http://lipdverse.org/iso2k/1_0_0/LS13LUBA.html	MJ
LS13STEL	LS13STEL	LS13STEL01	LakeSediment	10.1130/G33736.1	Stansell, N. D., Steinman, B. A., Abbott, M. B., Rubinov, M. and Roman-Lacayo, M.: Lacustrine stable isotope record of precipitation changes in Nicaragua during the Little Ice Age and Medieval Climate Anomaly, Geology, 41(2), 151–154, doi:10.1130/g33736.1, 2013.			https://www.ncdc.noaa.gov/paleo/study/13195	11.9	-85.9167	44	Lago El Grancho	341	2004	d18O	permil	carbonate	ostracod	Physocypria	lake water	Oxygen isotope values of El Gancho surface water samples are enriched by ~8? relative to local meteoric water (Fig. 3), indicating substantial water loss through both evaporation and nonfractionating outfl ow pathways (i.e., overfl ow and outseepage through the lake bed), and a resulting lake water isotopic sensitivity to changes in hydrologic balance. isotopic and hydrologic modeling supports th…	negative	P_E		TRUE	http://lipdverse.org/iso2k/1_0_0/LS13STEL.html	MJ
LS13WASU01B	LS13WASU	LS13WASU01	LakeSediment	10.1177/0959683613486941	Wang, Z., Liu, W., Liu, Z., Wang, H., He, Y. and Zhang, F.: A 1700-year n-alkanes hydrogen isotope record of moisture changes in sediments from Lake Sugan in the Qaidam Basin, northeastern Tibetan Plateau, The Holocene, 23(9), 1350–1354, doi:10.1177/0959683613486941, 2013.			this compilation	38.8667	93.95	2800	Lake Sugan	293	2007	d2H	permil	terrestrial biomarker	n-alkane	C29	soil water	Variation in vegetation type (shrubs and grass) is the main factor influencing the [d2H of leaf waxes in] sediments of Lake Sugan, because of the dD values of Chenopodiceae shrubs are higher than those of grasses. We can still discuss the moisture history using the hydrogen-isotope record, because the vegetation type would be consistent with hydrological condition. [i.e., Chenopodiaceae shrubs te…	negative	P_E	unknown	TRUE	http://lipdverse.org/iso2k/1_0_0/LS13WASU.html	ET
GH8f461f71	LS13YUSA	LS13YUSA	LakeSediment	10.1016/j.palaeo.2013.09.016	Yuan, F., Koran, M. R. and Valdez, A.: Late Glacial and Holocene record of climatic change in the southern Rocky Mountains from sediments in San Luis Lake, Colorado, USA, Palaeogeography, Palaeoclimatology, Palaeoecology, 392, 146–160, doi:10.1016/j.palaeo.2013.09.016, 2013.			https://www.ncdc.noaa.gov/paleo/study/16114	37.675	-105.723	2293	San Luis Lake	-14620	1940	d18O	permil	carbonate	bulk carbonate		lake water		negative	I_E		TRUE	http://lipdverse.org/iso2k/1_0_0/LS13YUSA.html	MJ
LS14ATJU01A	LS14ATJU	LS14ATJU01A	LakeSediment	10.1016/j.epsl.2014.07.038	Atwood, A. R. and Sachs, J. P.: Separating ITCZ- and ENSO-related rainfall changes in the Galapagos over the last 3 kyr using D/H ratios of multiple lipid biomarkers, Earth and Planetary Science Letters, 404, 408–419, doi:10.1016/j.epsl.2014.07.038, 2014.			https://doi.org/10.1594/PANGAEA.834099	0.9	-89.4833	670	El Junco Lake	-779	2001	d2H	permil	aquatic biomarker	dinosterol		lake water	In closed (endorheic) lakes, lake water dD is driven by the ratio of precipitation to evaporation and the isotopic value of the precipitation which, in the tropics, is strongly negatively correlated with the amount of precipitation on monthly and longer timescales. The combination of these processes amplifies the response of lake water dD to changes in rainfall with lower (higher) dD values occur…	negative	P_E	annual	TRUE	http://lipdverse.org/iso2k/1_0_0/LS14ATJU.html	AA
LS14FEZA01D	LS14FEZA	LS14FEZA01	LakeSediment	10.1016/j.orggeochem.2013.10.015	Feakins, S. J., Kirby, M. E., Cheetham, M. I., Ibarra, Y. and Zimmerman, S. R. H.: Fluctuation in leaf wax D/H ratio from a southern California lake records significant variability in isotopes in precipitation during the late Holocene, Organic Geochemistry, 66, 48–59, doi:10.1016/j.orggeochem.2013.10.015, 2014.			https://www.ncdc.noaa.gov/paleo/study/15634	34.7778	-120.039	730	Zaca Lake	-982	2008	d2H	permil	terrestrial biomarker	n-alkanoic acid	C28	soil water	SEASONALITY: "First, during water uptake, plants are expected to sample the spring growing season precipitation, at the end of the wet season [October-March], as the temperature warms up and before the dry summer months (Feakins and Sessions, 2010; Kahmen et al., 2011; Tipple et al., 2013). During this time, the plants may record the isotopic signature of just a few storms each year heightening v…	positive	P_isotope	ONDJFM	TRUE	http://lipdverse.org/iso2k/1_0_0/LS14FEZA.html	ET
LS14KOSA01A	LS14KOSA	LS14KOSA01	LakeSediment	10.1016/j.palaeo.2013.12.037	Konecky, B., Russell, J., Huang, Y., Vuille, M., Cohen, L. and Street-Perrott, F. A.: Impact of monsoons, temperature, and CO2 on the rainfall and ecosystems of Mt. Kenya during the Common Era, Palaeogeography, Palaeoclimatology, Palaeoecology, 396, 17–25, doi:10.1016/j.palaeo.2013.12.037, 2014.			https://www.ncdc.noaa.gov/paleo/study/17919	0.0833	37.5333	2350	Sacred Lake	211	1985	d2H	permil	terrestrial biomarker	n-alkanoic acid	C28	soil water	In East Africa, stable isotopes in modern precipitation have been shown to reflect large-scale atmospheric circulation processes (Vuille et al., 2005), and the ?18O of precipitation (and by inference, the ?D of precipitation) on Mt. Kenya has been shown to be a good indicator of moisture balance (Barker et al., 2001). Leaf wax ?D reflects ?Dprecip, after a series of offsets due to soil water evap…	positive	P_isotope	annual	TRUE	http://lipdverse.org/iso2k/1_0_0/LS14KOSA.html	ET
LPD343ffe05	LS14LASO	LPD343ffe05	LakeSediment	10.1177/0959683614534741	Lauterbach, S., Witt, R., Plessen, B., Dulski, P., Prasad, S., Mingram, J., Gleixner, G., Hettler-Riedel, S., Stebich, M., Schnetger, B., Schwalb, A. and Schwarz, A.: Climatic imprint of the mid-latitude Westerlies in the Central Tian Shan of Kyrgyzstan and teleconnections to North Atlantic climate variability during the last 6000 years, The Holocene, 24(8), 970–984, doi:10.1177/0959683614534741,…			https://doi.org/10.1594/PANGAEA.834963	41.7939	75.1961	3016	Sonk11D	-4038.8	1994.9	d2H	permil	terrestrial biomarker	n-alkane	C29	precipitation	δDn-C29 record of the Son Kol sediments can be used to infer information about past summer moisture conditions.	negative	P_E	JJA	TRUE	http://lipdverse.org/iso2k/1_0_0/LS14LASO.html	MF (31/12/19)
LS14LESA01a	LS14LESA	LS14LESA01	LakeSediment	10.1177/0959683614530443	Lei, Y., Tian, L., Bird, B. W., Hou, J., Ding, L., Oimahmadov, I. and Gadoev, M.: A 2540-year record of moisture variations derived from lacustrine sediment (Sasikul Lake) on the Pamir Plateau, The Holocene, 24(7), 761–770, doi:10.1177/0959683614530443, 2014.			this compilation	37.7	73.1833	3816	Sasikul Lake	-542	2000	d18O	permil	carbonate	bulk carbonate	<38.5um	lake water		negative	P_E		TRUE	http://lipdverse.org/iso2k/1_0_0/LS14LESA.html	MJ
LS14PRLO01a	LS14PRLO	LS14PRLO01	LakeSediment	10.1016/j.epsl.2014.01.043	Prasad, S., Anoop, A., Riedel, N., Sarkar, S., Menzel, P., Basavaiah, N., Krishnan, R., Fuller, D., Plessen, B., Gaye, B., Roehl, U., Wilkes, H., Sachse, D., Sawant, R., Wiesner, M. G. and Stebich, M.: Prolonged monsoon droughts and links to Indo-Pacific warm pool: A Holocene record from Lonar Lake, central India, Earth and Planetary Science Letters, 391, 171–182, doi:10.1016/j.epsl.2014.01.043, …			this compilation	19.9763	76.5077	475	Lonar	-9463.82	2008	d18O	permil	carbonate	bulk carbonate		lake water	covariation with d13C, comparison with Al content	negative	I_E		TRUE	http://lipdverse.org/iso2k/1_0_0/LS14PRLO.html	MJ
LS14TAKA01a	LS14TAKA	LS14TAKA01	LakeSediment	10.1007/s10933-014-9776-4	Taft, L., Mischke, S., Wiechert, U., Leipe, C., Rajabov, I. and Riedel, F.: Sclerochronological oxygen and carbon isotope ratios in Radix (Gastropoda) shells indicate changes of glacial meltwater flux and temperature since 4,200 cal yr BP at Lake Karakul, eastern Pamirs (Tajikistan), Journal of Paleolimnology, 52(1-2), 27–41, doi:10.1007/s10933-014-9776-4, 2014.			this compilation	38.86	73.26	3928	Lake Karakul	-2114	1904	d18O	permil	carbonate	gastropod	Radix	lake water	general isotopic composition of the lake water follows the decreasing solar insolation over ~4200 yrs.	positive	P_isotope		TRUE	http://lipdverse.org/iso2k/1_0_0/LS14TAKA.html	MJ
LS14YAHA02a	LS14YAHA	LS14YAHA01	LakeSediment	10.1016/j.quascirev.2014.04.030	Yan, D. and Wuennemann, B.: Late Quaternary water depth changes in Hala Lake, northeastern Tibetan Plateau, derived from ostracod assemblages and sediment properties in multiple sediment records, Quaternary Science Reviews, 95, 95–114, doi:10.1016/j.quascirev.2014.04.030, 2014.			this compilation	38.3	97.58	4078	Hala Lake	-6830	1849.7	d18O	permil	carbonate	bulk carbonate	calcite <63 Aum	lake water	d18O-d13C covariation	negative	P_E		TRUE	http://lipdverse.org/iso2k/1_0_0/LS14YAHA.html	DK
LS14ZHJU01A	LS14ZHJU	LS14ZHJU01	LakeSediment	10.1016/j.epsl.2014.07.013	Zhang, Z., Leduc, G. and Sachs, J. P.: El Nino evolution during the Holocene revealed by a biomarker rain gauge in the Galapagos Islands, Earth and Planetary Science Letters, 404, 420–434, doi:10.1016/j.epsl.2014.07.013, 2014.			this compilation	-0.9	-89.4833	670	El Junco Lake	-7153.7	2001.2	d2H	permil	aquatic biomarker	Botryococcene isomer	C34	lake water	It is expected that dD values of botryococcene will decline when precipitation rates increase, possibly providing a metric for the severity of extreme rainfall events that are associated with El Nino events. (All botryococcene dD values were highly correlated with water dD values (R2>0.99). And, Zhang and Sachs 2007, Organic Geochemistry), 38: 582-608.	negative	P_E	annual	TRUE	http://lipdverse.org/iso2k/1_0_0/LS14ZHJU.html	ET, AA
LS15ABSH01a	LS15ABSH	LS15ABSH01	LakeSediment	10.1177/0959683615584204	Abu-Zied, R. H. and Bantan, R. A.: Palaeoenvironment, palaeoclimate and sea-level changes in the Shuaiba Lagoon during the late Holocene (last 3.6 ka), eastern Red Sea coast, Saudi Arabia, The Holocene, 25(8), 1301–1312, doi:10.1177/0959683615584204, 2015.			this compilation	20.7	39.4333	0	Shuaiba Lagoon	-441.147	1924.35	d18O	permil	carbonate	foram	Elphidium striatopunctatum	lagoon water	Low frequency correlation with inferred tidal level	negative	I_E		TRUE	http://lipdverse.org/iso2k/1_0_0/LS15ABSH.html	MJ
LS15AIKA01B	LS15AIKA	LS15AIKA01	LakeSediment	10.5194/cp-11-619-2015	Aichner, B., Feakins, S. J., Lee, J. E., Herzschuh, U. and Liu, X.: High-resolution leaf wax carbon and hydrogen isotopic record of the late Holocene paleoclimate in arid Central Asia, Climate of the Past, 11(4), 619–633, doi:10.5194/cp-11-619-2015, 2015.			https://www.ncdc.noaa.gov/paleo/study/20166	38.4397	75.0572	3650	Lake Karakuli	-2199	1982	d2H	permil	terrestrial biomarker	n-alkanoic acid	C28	soil water	Higher isotopic values in the summer compared to the winter (Yao et al., 2013; Bowen and Revenaugh, 2003) suggest that monthly values are indeed driven by temperature. If these seasonal controls also determine interannual variations in the isotopic composition of precipitation then temperature is likely to be a major factor explaining the reconstructed hydrogen isotopic variability. A higher perc…	positive	P_isotope	annual	TRUE	http://lipdverse.org/iso2k/1_0_0/LS15AIKA.html	ET
LS15AIKA01A2	LS15AIKA	LS15AIKA01	LakeSediment	10.5194/cp-11-619-2015	Aichner, B., Feakins, S. J., Lee, J. E., Herzschuh, U. and Liu, X.: High-resolution leaf wax carbon and hydrogen isotopic record of the late Holocene paleoclimate in arid Central Asia, Climate of the Past, 11(4), 619–633, doi:10.5194/cp-11-619-2015, 2015.			https://www.ncdc.noaa.gov/paleo/study/20166	38.4397	75.0572	3650	Lake Karakuli	-2199	1982	d2H		terrestrial biomarker	n-alkanoic acid	C26	soil water	Higher isotopic values in the summer compared to the winter (Yao et al., 2013; Bowen and Revenaugh, 2003) suggest that monthly values are indeed driven by temperature. If these seasonal controls also determine interannual variations in the isotopic composition of precipitation then temperature is likely to be a major factor explaining the reconstructed hydrogen isotopic variability. A higher perc…	positive	P_isotope	annual	TRUE	http://lipdverse.org/iso2k/1_0_0/LS15AIKA.html	ET
LS15BHAL	LS15BHAL	LS15BHAL01	LakeSediment	10.1073/pnas.1405653112	Bhattacharya, T., Byrne, R., Boehnel, H., Wogau, K., Kienel, U., Ingram, B. L. and Zimmerman, S.: Cultural implications of late Holocene climate change in the Cuenca Oriental, Mexico, Proceedings of the National Academy of Sciences, 112(6), 1693–1698, doi:10.1073/pnas.1405653112, 2015.			https://www.ncdc.noaa.gov/paleo/study/17735	19.0915	-97.5338	2376	Laguna de Aljojuca	-2189.7	1999.2	d18O	permil	carbonate	bulk carbonate		lake water	We interpret changes in d18O as indicative of changes in the ratio of evaporation and precipitation (E/P)	negative	P_E		TRUE	http://lipdverse.org/iso2k/1_0_0/LS15BHAL.html	MJ
LS15DENA02a	LS15DENA	LS15DENA01	LakeSediment	10.1016/j.quascirev.2015.07.023	Dean, J. R., Jones, M. D., Leng, M. J., Noble, S. R., Metcalfe, S. E., Sloane, H. J., Sahy, D., Eastwood, W. J. and Roberts, C. N.: Eastern Mediterranean hydroclimate over the late glacial and Holocene, reconstructed from the sediments of Nar lake, central Turkey, using stable isotopes and carbonate mineralogy, Quaternary Science Reviews, 124, 162–174, doi:10.1016/j.quascirev.2015.07.023, 2015.			this compilation	38.34	34.46	1363	Lake Nar	-11551	749	d18O	permil	carbonate	bulk carbonate		lake water	Modern lake isotope hydrology, climate calibration, down core changes in other proxies.	negative	P_E		TRUE	http://lipdverse.org/iso2k/1_0_0/LS15DENA.html	MJ
LS15DOCH01C	LS15DOCH	LS15DOCH01	LakeSediment	10.1073/pnas.1419133112	Douglas, P. M. J., Pagani, M., Canuto, M. A., Brenner, M., Hodell, D. A., Eglinton, T. I. and Curtis, J. H.: Drought, agricultural adaptation, and sociopolitical collapse in the Maya Lowlands, Proceedings of the National Academy of Sciences, 112(18), 5607–5612, doi:10.1073/pnas.1419133112, 2015.			this compilation	19.8333	-88.75	5	Lake Chichancanab	-1489	1391	d2H	permil	terrestrial biomarker	n-alkanoic acid	C30	soil water	In the modern Maya Lowlands, ?Dwax is well correlated with precipitation amount and varies by 60? across an annual precipitation gradient of 2,500 mm (Fig. 2).	negative	P_E	annual	TRUE	http://lipdverse.org/iso2k/1_0_0/LS15DOCH.html	ET
LS15DOCH01B	LS15DOCH	LS15DOCH01	LakeSediment	10.1073/pnas.1419133112	Douglas, P. M. J., Pagani, M., Canuto, M. A., Brenner, M., Hodell, D. A., Eglinton, T. I. and Curtis, J. H.: Drought, agricultural adaptation, and sociopolitical collapse in the Maya Lowlands, Proceedings of the National Academy of Sciences, 112(18), 5607–5612, doi:10.1073/pnas.1419133112, 2015.			this compilation	19.8333	-88.75	5	Lake Chichancanab	-1489	1391	d2H	permil	terrestrial biomarker	n-alkanoic acid	C28	soil water	In the modern Maya Lowlands, ?Dwax is well correlated with precipitation amount and varies by 60? across an annual precipitation gradient of 2,500 mm (Fig. 2).	negative	P_E	annual	TRUE	http://lipdverse.org/iso2k/1_0_0/LS15DOCH.html	ET
LS15DOSA01C	LS15DOSA	LS15DOSA01	LakeSediment	10.1073/pnas.1419133112	Douglas, P. M. J., Pagani, M., Canuto, M. A., Brenner, M., Hodell, D. A., Eglinton, T. I. and Curtis, J. H.: Drought, agricultural adaptation, and sociopolitical collapse in the Maya Lowlands, Proceedings of the National Academy of Sciences, 112(18), 5607–5612, doi:10.1073/pnas.1419133112, 2015.			this compilation	16.98	-89.67	105	Lake Salpeten	-917	1712	d2H	permil	terrestrial biomarker	n-alkanoic acid	C30	soil water	In the modern Maya Lowlands, ?Dwax is well correlated with precipitation amount and varies by 60? across an annual precipitation gradient of 2,500 mm (Fig. 2).	negative	P_E	annual	TRUE	http://lipdverse.org/iso2k/1_0_0/LS15DOSA.html	ET
LS15DOSA01B	LS15DOSA	LS15DOSA01	LakeSediment	10.1073/pnas.1419133112	Douglas, P. M. J., Pagani, M., Canuto, M. A., Brenner, M., Hodell, D. A., Eglinton, T. I. and Curtis, J. H.: Drought, agricultural adaptation, and sociopolitical collapse in the Maya Lowlands, Proceedings of the National Academy of Sciences, 112(18), 5607–5612, doi:10.1073/pnas.1419133112, 2015.			this compilation	16.98	-89.67	105	Lake Salpeten	-917	1712	d2H	permil	terrestrial biomarker	n-alkanoic acid	C28	soil water	In the modern Maya Lowlands, ?Dwax is well correlated with precipitation amount and varies by 60? across an annual precipitation gradient of 2,500 mm (Fig. 2).	negative	P_E	annual	TRUE	http://lipdverse.org/iso2k/1_0_0/LS15DOSA.html	ET
LS15JOPA01	LS15JOPA	LS15JOPA01	LakeSediment	10.1177/0959683615594242	Jones, M. D., Djamali, M., Holmes, J., Weeks, L., Leng, M. J., Lashkari, A., Alamdari, K., Noorollahi, D., Thomas, L. and Metcalfe, S. E.: Human impact on the hydroenvironment of Lake Parishan, SW Iran, through the late-Holocene, The Holocene, 25(10), 1651–1661, doi:10.1177/0959683615594242, 2015.			this compilation	29.514	51.8	820	Lake Parishan	-2029	1909	d18O	permil	carbonate	bulk carbonate	<90um	lake water	Modern lake isotoep hydrology and mineralogy change downcore	negative	P_E		TRUE	http://lipdverse.org/iso2k/1_0_0/LS15JOPA.html	MJ
LS15LAOH01a	LS15LAOH	LS15LAOH01	LakeSediment	10.1007/s00531-014-1033-6	Lacey, J. H., Francke, A., Leng, M. J., Vane, C. H. and Wagner, B.: A high-resolution Late Glacial to Holocene record of environmental change in the Mediterranean from Lake Ohrid (Macedonia/Albania), International Journal of Earth Sciences, 104(6), 1623–1638, doi:10.1007/s00531-014-1033-6, 2014.			this compilation	41.0658	20.6728	693	Ohrid	-8314	1950	d18O	permil	carbonate	bulk carbonate	<63um	lake water	Modern lakewater defines a local evaporation line (LEL) distinct from global meteoric water line (GMWL) .	negative	I_E		TRUE	http://lipdverse.org/iso2k/1_0_0/LS15LAOH.html	MJ
LS15OEPO01a	LS15OEPO	LS15OEPO01	LakeSediment	10.1016/j.quascirev.2015.02.006	Oehlerich, M., Mayr, C., Gussone, N., Hahn, A., Hoelzl, S., Luecke, A., Ohlendorf, C., Rummel, S., Teichert, B. M. A. and Zolitschka, B.: Lateglacial and Holocene climatic changes in south-eastern Patagonia inferred from carbonate isotope records of Laguna Potrok Aike (Argentina), Quaternary Science Reviews, 114, 189–202, doi:10.1016/j.quascirev.2015.02.006, 2015.			this compilation	-51.95	-70.38	113	Laguna Potrok Aike	-7335	1971	d18O	permil	carbonate	bulk carbonate	<200 Aum	lake water	Gat & Levy (1978); Mayr et al. (2007)	negative	I_E		TRUE	http://lipdverse.org/iso2k/1_0_0/LS15OEPO.html	MJ
LS15SHBO01A	LS15SHBO	LS15SHBO01	LakeSediment	10.1038/ngeo2329	Shanahan, T. M., McKay, N. P., Hughen, K. A., Overpeck, J. T., Otto-Bliesner, B., Heil, C. W., King, J., Scholz, C. A. and Peck, J.: The time-transgressive termination of the African Humid Period, Nature Geoscience, 8(2), 140–144, doi:10.1038/ngeo2329, 2015.			https://www.ncdc.noaa.gov/paleo/study/18355	6.5	-1.4167	97	Lake Bosumtwi	-19076	1881.18	d2H	permil	terrestrial biomarker	n-alkane	C31	soil water	As the hydrogen isotopic composition of precipitation in tropical West Africa is controlled mostly by the ?amount effect? (22), ?Dwax values are interpreted here as indicators of changes in wet season precipitation intensity, following corrections for global ice volume and vegetation type (Supplementary Section 2.3 and Fig. 5). Independent support for the ?Dwax record comes from an updated recons…	positive	P_isotope	AMJJASO	TRUE	http://lipdverse.org/iso2k/1_0_0/LS15SHBO.html	ET
LS15SHNE01A	LS15SHNE	LS15SHNE01A	LakeSediment	10.1016/j.quascirev.2015.07.006	Sharifi, A., Pourmand, A., Canuel, E. A., Ferer-Tyler, E., Peterson, L. C., Aichner, B., Feakins, S. J., Daryaee, T., Djamali, M., Beni, A. N., Lahijani, H. A. K. and Swart, P. K.: Abrupt climate variability since the last deglaciation based on a high-resolution, multi-proxy peat record from NW Iran: The hand that rocked the Cradle of Civilization?, Quaternary Science Reviews, 123, 215–230, doi:1…			this compilation	37.9603	48.5553	2500	Neor	-11040	1871	d2H	permil	terrestrial biomarker	n-alkanoic acid	C28	soil water	The average monthly dD of precipitation in the interior of West Asia is correlated with average monthly precipitation at two meteoro- logical stations located 1365 km to the west and 390 km to the east of the Neor peat mire at the same latitude (Fig. 6).	positive	P_isotope		TRUE	http://lipdverse.org/iso2k/1_0_0/LS15SHNE.html	ET
LPD7dc5b9ba	LS16STCL	LS16STCL01	LakeSediment	10.1016/j.quascirev.2016.04.012	Steinman, B. A., Pompeani, D. P., Abbott, M. B., Ortiz, J. D., Stansell, N. D., Finkenbinder, M. S., Mihindukulasooriya, L. N. and Hillman, A. L.: Oxygen isotope records of Holocene climate variability in the Pacific Northwest, Quaternary Science Reviews, 142, 40–60, doi:10.1016/j.quascirev.2016.04.012, 2016.			https://www.ncdc.noaa.gov/paleo/study/21250	50.83	-116.39	1126	Cleland Lake	-5605.7	2009	d18O	permil	carbonate	bulk carbonate		lake water		negative	P_E		TRUE	http://lipdverse.org/iso2k/1_0_0/LS16STCL.html	MJ
LPD179d915e	LS16STPA	LS16STPA	LakeSediment	10.1016/j.quascirev.2016.04.012	Steinman, B. A., Pompeani, D. P., Abbott, M. B., Ortiz, J. D., Stansell, N. D., Finkenbinder, M. S., Mihindukulasooriya, L. N. and Hillman, A. L.: Oxygen isotope records of Holocene climate variability in the Pacific Northwest, Quaternary Science Reviews, 142, 40–60, doi:10.1016/j.quascirev.2016.04.012, 2016.			https://www.ncdc.noaa.gov/paleo/study/21250	54.685	-122.617	733	Paradise	-7150.4	2007.5	d18O	permil	carbonate	bulk carbonate		lake water		negative	P_E		TRUE	http://lipdverse.org/iso2k/1_0_0/LS16STPA.html	MJ
WEB69678476	LS16THN301	LS16THN30101	LakeSediment	10.1002/2016GL068513	Thomas, E. K., Briner, J. P., Ryan‐Henry, J. J. and Huang, Y.: A major increase in winter snowfall during the middle Holocene on western Greenland caused by reduced sea ice in Baffin Bay and the Labrador Sea, Geophysical Research Letters, 43(10), 5302–5308, doi:10.1002/2016gl068513, 2016.			https://www.ncdc.noaa.gov/paleo/study/20126	68.6374	-50.98	59	Lake N3	-5849.35	1951.24	d2H	permil		n-alkanoic acid	C24	lake water	Lake N3 I´2Haq has a >100a€° range during the past 8 kyr, larger than the range of modern seasonal I´2Hprecip in Disko Bugt (Figures 1 and 2a). We interpret these large changes in I´2Haq to indicate changes in precipitation sea- sonality, with Arctic moisture sources contributing to the exceptionally low I´2H values. The magnitude and direc- tion of I´2Haq changes cannot be explained by changes i…	positive	P_isotope	annual	TRUE	http://lipdverse.org/iso2k/1_0_0/LS16THN301.html	ET
WEB2bbc35a8	LS16THN301	LS16THN30102	LakeSediment	10.1002/2016GL068513	Thomas, E. K., Briner, J. P., Ryan‐Henry, J. J. and Huang, Y.: A major increase in winter snowfall during the middle Holocene on western Greenland caused by reduced sea ice in Baffin Bay and the Labrador Sea, Geophysical Research Letters, 43(10), 5302–5308, doi:10.1002/2016gl068513, 2016.			https://www.ncdc.noaa.gov/paleo/study/20126	68.6374	-50.98	59	Lake N3	-5849.35	1951.24	d2H	permil		n-alkanoic acid	C28	soil water	Our interpretation of Lake N3 I´2Hterr as summer temperature is supported in several ways (Figure 3). First, I´2Hterr exhibits similar centennial-scale patterns during the past ~ 300 years as midge-inferred summer temperature anomalies at North Lake, western Greenland (Figure 3c) [Axford et al., 2013]. Coldest conditions in both records correspond with the Little Ice Age and end with warming in r…	positive	P_isotope	JJAS	TRUE	http://lipdverse.org/iso2k/1_0_0/LS16THN301.html	ET
WEBaddada01	LS16THQI01	LS16THQI0101	LakeSediment	10.1016/j.quascirev.2015.11.003	Thomas, E. K., Huang, Y., Clemens, S. C., Colman, S. M., Morrill, C., Wegener, P. and Zhao, J.: Changes in dominant moisture sources and the consequences for hydroclimate on the northeastern Tibetan Plateau during the past 32 kyr, Quaternary Science Reviews, 131, 157–167, doi:10.1016/j.quascirev.2015.11.003, 2016.			https://www.ncdc.noaa.gov/paleo/study/19421	37	100	3194	Lake Qinghai	-29653	1926	d2H	permil	terrestrial biomarker	n-alkanoic acid	C28	soil water	When interpreted in conjunction with other proxy records for moisture and aridity, and by controlling for plant type via detailed pollen stratigraphy and Iuapp data for modern plants, d2Hwax can be used to infer changes in moisture source area and transport history.	positive	P_isotope	AMJJAS	TRUE	http://lipdverse.org/iso2k/1_0_0/LS16THQI01.html	ET
LPD76e57382	LS16WIGH	LS16WIGH01	LakeSediment	10.1016/j.quascirev.2016.07.020	Wirth, S. B. and Sessions, A. L.: Plant-wax D/H ratios in the southern European Alps record multiple aspects of climate variability, Quaternary Science Reviews, 148, 176–191, doi:10.1016/j.quascirev.2016.07.020, 2016.			https://doi.org/10.1594/PANGAEA.864869	45.9166	8.8225	415	Lake Ghirla	-10952	2004	d2H	permil	terrestrial biomarker	n-alkanoic acid	C28	soil water		positive	P_isotope		TRUE	http://lipdverse.org/iso2k/1_0_0/LS16WIGH.html	MJ
WEBc5c2e8ea	LS17BAHA01	LS17BAHA0101	LakeSediment	10.1016/j.quascirev.2016.11.036	Balascio, N. L., D’Andrea, W. J., Gjerde, M. and Bakke, J.: Hydroclimate variability of High Arctic Svalbard during the Holocene inferred from hydrogen isotopes of leaf waxes, Quaternary Science Reviews, 183, 177–187, doi:10.1016/j.quascirev.2016.11.036, 2018.	10.1016/j.quascirev.2017.02.017	Gjerde, M., Bakke, J., D’Andrea, W. J., Balascio, N. L., Bradley, R. S., Vasskog, K., Olafsdottir, S., Roethe, T. O., Perren, B. B. and Hormes, A.: Holocene multi-proxy environmental reconstruction from lake Hakluytvatnet, Amsterdamoeya Island, Svalbard (79.5°N), Quaternary Science Reviews, 183, 164–176, doi:10.1016/j.quascirev.2017.02.017, 2018.	this compilation	79.7733	10.7378	12	Haklyutvatnet	-10895.8	1992.1	d2H	permil	aquatic biomarker	n-alkane	C25	lake water	The hydrogen isotopic composition (D/H; dD using the delta notation) of leaf wax n-al- kanes reflects the D/H of source water used by a plant after modification by evaporation and biosynthetic fractionation (Kahmen et al., 2013a,b; Sachse et al., 2004, 2012), and therefore is useful for paleohydrologic reconstructions. The movement of water through the hydrologic cycle (Dansgaard, 1964), as well …	positive	P_isotope	JJA	TRUE	http://lipdverse.org/iso2k/1_0_0/LS17BAHA01.html	ET
WEBd7a384df	LS17BAHA01	LS17BAHA0101	LakeSediment	10.1016/j.quascirev.2016.11.036	Balascio, N. L., D’Andrea, W. J., Gjerde, M. and Bakke, J.: Hydroclimate variability of High Arctic Svalbard during the Holocene inferred from hydrogen isotopes of leaf waxes, Quaternary Science Reviews, 183, 177–187, doi:10.1016/j.quascirev.2016.11.036, 2018.	10.1016/j.quascirev.2017.02.017	Gjerde, M., Bakke, J., D’Andrea, W. J., Balascio, N. L., Bradley, R. S., Vasskog, K., Olafsdottir, S., Roethe, T. O., Perren, B. B. and Hormes, A.: Holocene multi-proxy environmental reconstruction from lake Hakluytvatnet, Amsterdamoeya Island, Svalbard (79.5°N), Quaternary Science Reviews, 183, 164–176, doi:10.1016/j.quascirev.2017.02.017, 2018.	this compilation	79.7733	10.7378	12	Haklyutvatnet	-10895.8	1992.1	d2H	permil	aquatic biomarker	n-alkane	C29	lake water	The hydrogen isotopic composition (D/H; dD using the delta notation) of leaf wax n-al- kanes reflects the D/H of source water used by a plant after modification by evaporation and biosynthetic fractionation (Kahmen et al., 2013a,b; Sachse et al., 2004, 2012), and therefore is useful for paleohydrologic reconstructions. The movement of water through the hydrologic cycle (Dansgaard, 1964), as well …	positive	P_isotope	JJA	TRUE	http://lipdverse.org/iso2k/1_0_0/LS17BAHA01.html	ET
WEBab3eac63	LS17STNU01	LS17STNU0101	LakeSediment	10.1016/j.quascirev.2017.09.013	Stansell, N. D., Klein, E. S., Finkenbinder, M. S., Fortney, C. S., Dodd, J. P., Terasmaa, J. and Nelson, D. B.: A stable isotope record of Holocene precipitation dynamics in the Baltic region from Lake Nuudsaku, Estonia, Quaternary Science Reviews, 175, 73–84, doi:10.1016/j.quascirev.2017.09.013, 2017.			https://www.ncdc.noaa.gov/paleo/study/22594	58.1969	25.6275	93	Lake Nuudsaku	-7497	2014.9	d18O	permil	carbonate	bulk carbonate		lake water	we interpret the I´18Ocalcite variations from Lake Nuudsaku as a record of meteoric inputs	positive	P_isotope		TRUE	http://lipdverse.org/iso2k/1_0_0/LS17STNU01.html	MJ
WEBdc316522	LS17VAWA01	LS17VAWA0101	LakeSediment	10.1177/0959683617702230	Vachula, R. S., Chipman, M. L. and Hu, F. S.: Holocene climatic change in the Alaskan Arctic as inferred from oxygen-isotope and lake-sediment analyses at Wahoo Lake, The Holocene, 27(11), 1631–1644, doi:10.1177/0959683617702230, 2017.			https://www.ncdc.noaa.gov/paleo/study/20610	69.0763	-146.93	700	Wahoo Lake Shelf Core	-1519	1025	d18O	permil	carbonate	gastropod		lake water	Late-Holocene variations in our I´18O record display coherent patterns with regional glacier fluctuations at centennial to millennial scales, suggesting that I´18O minima were related to a combination of low temperatures and enhanced winter snowfall	positive	P_isotope		TRUE	http://lipdverse.org/iso2k/1_0_0/LS17VAWA01.html	MJ
LS89LATI	LS89LATI	LS89LATI01	LakeSediment	10.2307/2845311	Lamb, H. F., Eicher, U. and Switsur, V. R.: An 18,000-Year Record of Vegetation, Lake-Level and Climatic Change from Tigalmamine, Middle Atlas, Morocco, Journal of Biogeography, 16(1), 65, doi:10.2307/2845311, 1989.			this compilation	32.9	5.35	1626	Lake Tiaglamimine	-561.39	1147.96	d18O	permil	carbonate	bulk carbonate		lake water	basis for anything to do with the d18O data in this paper is unclear	negative	I_E		TRUE	http://lipdverse.org/iso2k/1_0_0/LS89LATI.html	MJ
LS91BEWA	LS91BEWA	LS91BEWA01	LakeSediment	10.1016/0031-0182(91)90147-J	Benson, L. V., Meyers, P. A. and Spencer, R. J.: Change in the size of Walker Lake during the past 5000 years, Palaeogeography, Palaeoclimatology, Palaeoecology, 81(3-4), 189–214, doi:10.1016/0031-0182(91)90147-j, 1991.			this compilation	37.87	-119.16	1196	Walker Lake	-724.67	1998.5	d18O	permil	carbonate	bulk carbonate	TIC	lake water	6180 values (relative to the PDB standard) in the TIC fraction, in hand-picked carbonate crystals, and in L. ceriotuberosa are shown in Fig. 12b,c. Individual carbonate crystals and the TIC fraction of samples from shallow-lake intervals are isotopically enriched in 180, indicating the importance of evaporative removal of 180-depleted water vapor from the lake relative to the input of 180- deplet…	negative	P_E		TRUE	http://lipdverse.org/iso2k/1_0_0/LS91BEWA.html	MJ
LS91HOMI	LS91HOMI	LS91HOMI	LakeSediment	10.1038/352790a0	Hodell, D. A., Curtis, J. H., Jones, G. A., Higuera-Gundy, A., Brenner, M., Binford, M. W. and Dorsey, K. T.: Reconstruction of Caribbean climate change over the past 10,500 years, Nature, 352(6338), 790–793, doi:10.1038/352790a0, 1991.			https://www.ncdc.noaa.gov/paleo/study/23092	18.402	-73.046	20	Miragoane	-9599.3	2055.5	d18O	permil	carbonate	ostracod	Candona sp.	lake water	In closed-basin lakes with seasonally dry cliamte, the 18O/16O ratio of lake water is controlled mainly by the ratio of evporatino to precipitation.	negative	P_E		TRUE	http://lipdverse.org/iso2k/1_0_0/LS91HOMI.html	MJ
LS96CUPUb	LS96CUPU	LS96CUPU01	LakeSediment	10.1006/qres.1996.0042	Curtis, J. H., Hodell, D. A. and Brenner, M.: Climate Variability on the Yucatan Peninsula (Mexico) during the Past 3500 Years, and Implications for Maya Cultural Evolution, Quaternary Research, 46(1), 37–47, doi:10.1006/qres.1996.0042, 1996.			https://www.ncdc.noaa.gov/cdo/f?p=519:1:0::::P1_STUDY_ID:5484	20.63	-87.61	14	Punta Laguna	-1597.6	1993	d18O	permil	carbonate	ostracod	Cytheridella ilosvayi	lake water	This is demonstrated for Lake Punta Laguna by comparing the measured d18O values of lakewater, rainfall, and groundwater. Local groundwater and rainwater have depleted d18O values of 03.91 and 03.92?, respectively, whereas the lakewater is significantly enriched, averaging 0.93? (Table 3)	negative	P_E		TRUE	http://lipdverse.org/iso2k/1_0_0/LS96CUPU.html	DK
LS96VOAM01	LS96VOAM	LS96VOAM01	LakeSediment	10.1016/S0016-7037(96)00230-X	Von Grafenstein, U., Erlenkeuser, H., Mueller, J., Trimborn, P. and Alefs, J.: A 200 year mid-European air temperature record preserved in lake sediments: An extension of the δ18Op-air temperature relation into the past, Geochimica et Cosmochimica Acta, 60(21), 4025–4036, doi:10.1016/s0016-7037(96)00230-x, 1996.			http://www1.ncdc.noaa.gov/pub/data/paleo/paleolimnology/europe/germany/ammersee_1999.txt	47.1	11.0166	533	Ammersee	-13638.4	1962.08	d18O	permil	carbonate	ostracod	Candona sp.	lake water	monitoring of lake and inflow waters	positive	P_isotope		TRUE	http://lipdverse.org/iso2k/1_0_0/LS96VOAM.html	MJ
LS97HOKA1a	LS97HOKA	LS97HOKA01	LakeSediment	10.1144/gsjgs.154.2.0311	HOLMES, J. A., STREET-PERROTT, F. A., ALLEN, M. J., FOTHERGILL, P. A., HARKNESS, D. D., KROON, D. and PERROTT, R. A.: Holocene palaeolimnology of Kajemamm Oasis, Northern Nigeria: an isotopic study of ostracodes, bulk carbonate and organic carbon, Journal of the Geological Society, 154(2), 311–319, doi:10.1144/gsjgs.154.2.0311, 1997.			this compilation	13.305	11.0288	330	Kajemarum Oasis	-1645	1836	d18O	permil	carbonate	ostracod	Limnocythere gr. inopinata (typically c. 20 valves per sample)	lake water	In a closed, low-latitude lake basin, the d18O values of the lake water, which are the main control on the d18O values of carbonates, are influenced largely by the balance between inflow (mainly shallow groundwater, in the case of Kajemarum) and evaporation (Talbot 1990). Thus, the d18O record in endogenic carbonate should largely reflect salinity.	negative	I_E		TRUE	http://lipdverse.org/iso2k/1_0_0/LS97HOKA.html	MJ
LS98CUPE	LS98CUPE	LS98CUPE01	LakeSediment	10.1023/A:1007968508262	Curtis, J. H., Brenner, M., Hodell, D. A., Balser, R. A., Islebe, G. A. and Hooghiemstra, H.: Journal of Paleolimnology, 19(2), 139–159, doi:10.1023/a:1007968508262, 1998.			https://www.ncdc.noaa.gov/cdo/f?p=519:1:::::P1_STUDY_ID:5482	17.0003	-89.7848	110	Lake Peten-Itza	-8114	1952.08	d18O	permil	carbonate	gastropod	Pygophorus sp.	lake water	Mean lake water was enriched in 18O by evaporation and was 3.6? greater than mean rainwater.	negative	P_E		TRUE	http://lipdverse.org/iso2k/1_0_0/LS98CUPE.html	DK
LS99CUVAc	LS99CUVA	LS99CUVA01	LakeSediment	10.1191/095968399669724431	Curtis, J. H., Brenner, M. and Hodell, D. A.: Climate change in the Lake Valencia Basin, Venezuela, ~12600 yr BP to present, The Holocene, 9(5), 609–619, doi:10.1191/095968399669724431, 1999.			https://www.ncdc.noaa.gov/cdo/f?p=519:1:::::P1_STUDY_ID:5489	10.1667	-67.75	400	Lake Valencia	-10714	1993	d18O	permil	carbonate	ostracod	Cytheridella boldi	lake water	Lake level also important as lake not always closed but Since ,3000 14C yr BP the level of Lake Valencia has been dropping. Lake closed in present day, but last 2k isotoeps realtively fresh suggesting more open system?	negative	P_E		TRUE	http://lipdverse.org/iso2k/1_0_0/LS99CUVA.html	DK
LS99LASI	LS99LASI	LS99LASI01	LakeSediment	10.1023/A:1008099602205	Lamb, H., Roberts, N., Leng, M., Barker, P., Benkaddour, A. and van der Kaars, S.: Journal of Paleolimnology, 21(3), 325–343, doi:10.1023/a:1008099602205, 1999.			this compilation	33.05	5	2080	Lake Sidi Ali	-4425.4	1990	d18O	permil	carbonate	ostracod	Fabaeformiscandona fabaeformis	lake water	interpreting the data as a record of changing seasonality and/or isotopic composition (and therefore source) of precipitation, are therefore preferred	positive	P_isotope		TRUE	http://lipdverse.org/iso2k/1_0_0/LS99LASI.html	MJ
MS01HDAS01a	MS01HDAS	MS01HDAS01a	MarineSediment	10.1029/2000PA000511	Doose-Rolinski, H., Rogalla, U., Scheeder, G., Lueckge, A. and von Rad, U.: High-resolution temperature and evaporation changes during the Late Holocene in the northeastern Arabian Sea, Paleoceanography, 16(4), 358–367, doi:10.1029/2000pa000511, 2001.	10.1038/ngeo2510	McGregor, H. V., Evans, M. N., Goosse, H., Leduc, G., Martrat, B., Addison, J. A., Mortyn, P. G., Oppo, D. W., Seidenkrantz, M.-S., Sicre, M.-A., Phipps, S. J., Selvaraj, K., Thirumalai, K., Filipsson, H. L. and Ersek, V.: Robust global ocean cooling trend for the pre-industrial Common Era, Nature Geoscience, 8(9), 671–677, doi:10.1038/ngeo2510, 2015.	http://doi.pangaea.de/10.1594/PANGAEA.735717	24.83	65.92	-695	Arabian Sea	-2933.5	1950	d18O	permil	carbonate	planktonic foraminifera (G. Ruber)	G. ruber white 315-400	surface seawater	Urey, H. C. 1948. Oxygen isotopes in nature and in the laboratory. Science, 108:489?496.	negative	T_water	annual	TRUE	http://lipdverse.org/iso2k/1_0_0/MS01HDAS.html	GF 12/2019
MS02FLPC01a	MS02FLPC	MS02FLPC01a	MarineSediment	10.1029/2001PA000727	Lamy, F., Ruehlemann, C., Hebbeln, D. and Wefer, G.: High- and low-latitude climate control on the position of the southern Peru-Chile Current during the Holocene, Paleoceanography, 17(2), 16–1–16–10, doi:10.1029/2001pa000727, 2002.	10.1038/ngeo2510	McGregor, H. V., Evans, M. N., Goosse, H., Leduc, G., Martrat, B., Addison, J. A., Mortyn, P. G., Oppo, D. W., Seidenkrantz, M.-S., Sicre, M.-A., Phipps, S. J., Selvaraj, K., Thirumalai, K., Filipsson, H. L. and Ersek, V.: Robust global ocean cooling trend for the pre-industrial Common Era, Nature Geoscience, 8(9), 671–677, doi:10.1038/ngeo2510, 2015.	https://www.ncdc.noaa.gov/paleo/study/6242	-41	-74.45	-852	Chilean margin, Southern Ocean (Pacific sector)	-5733.75	1826.84	d18O	permil	carbonate	planktonic foraminifera	N. incompta, size not provided	subsurface seawater	Urey, H. C. 1948. Oxygen isotopes in nature and in the laboratory. Science, 108:489?496.	negative	T_water	annual	TRUE	http://lipdverse.org/iso2k/1_0_0/MS02FLPC.html	LJ.
MS03BRNS02	MS03BRNS	MS03BRNS02	MarineSediment	10.1029/2002PA000764	Risebrobakken, B., Jansen, E., Andersson, C., Mjelde, E. and Hevroey, K.: A high-resolution study of Holocene paleoclimatic and paleoceanographic changes in the Nordic Seas, Paleoceanography, 18(1), n/a–n/a, doi:10.1029/2002pa000764, 2003.			https://doi.pangaea.de/10.1594/PANGAEA.760166	66.9698	7.6393	-1048	Nordic Seas	-11753	1985	d18O	permil	carbonate	planktonic foraminifera	N. incompta 150-500	subsurface seawater	Urey, H. C. 1948. Oxygen isotopes in nature and in the laboratory. Science, 108:489?496.	negative	T_water	annual	TRUE	http://lipdverse.org/iso2kv0_10_0/MS03BRNS.html	LJ 20/02/2019
MS03BRNS01	MS03BRNS	MS03BRNS01	MarineSediment	10.1029/2002PA000764	Risebrobakken, B., Jansen, E., Andersson, C., Mjelde, E. and Hevroey, K.: A high-resolution study of Holocene paleoclimatic and paleoceanographic changes in the Nordic Seas, Paleoceanography, 18(1), n/a–n/a, doi:10.1029/2002pa000764, 2003.			https://doi.pangaea.de/10.1594/PANGAEA.760166	66.9698	7.6393	-1048	Nordic Seas	-11753	1985	d18O	permil	carbonate	planktonic foraminifera	N. pachyderma 150-500	subsurface seawater	Urey, H. C. 1948. Oxygen isotopes in nature and in the laboratory. Science, 108:489?496.	negative	T_water	annual	TRUE	http://lipdverse.org/iso2kv0_10_0/MS03BRNS.html	LJ 20/02/2019
MS03KTCB02	MS03KTCB	MS03KTCB02	MarineSediment	10.1029/2003GL017959	Tedesco, K. and Thunell, R.: High resolution tropical climate record for the last 6,000 years, Geophysical Research Letters, 30(17), n/a–n/a, doi:10.1029/2003gl017959, 2003.			this compilation	10.6667	-64.7	-366	Cariaco Basin	-4207.96	1799.56	d18O	permil	carbonate	planktonic foraminifera	N. dutertrei	subsurface seawater	Urey, H. C. 1948. Oxygen isotopes in nature and in the laboratory. Science, 108:489?496.	negative	T_water	annual	TRUE	http://lipdverse.org/iso2k/1_0_0/MS03KTCB.html	LJ 20/02/2019
MS03KTCB01	MS03KTCB	MS03KTCB01	MarineSediment	10.1029/2003GL017959	Tedesco, K. and Thunell, R.: High resolution tropical climate record for the last 6,000 years, Geophysical Research Letters, 30(17), n/a–n/a, doi:10.1029/2003gl017959, 2003.			this compilation	10.6667	-64.7	-366	Cariaco Basin	-4207.96	1799.56	d18O	permil	carbonate	planktonic foraminifera	G. ruber pink	surface seawater	Urey, H. C. 1948. Oxygen isotopes in nature and in the laboratory. Science, 108:489?496.	negative	T_water	annual	TRUE	http://lipdverse.org/iso2k/1_0_0/MS03KTCB.html	LJ 20/02/2019
MS03LKNS01	MS03LKNS	MS03LKNS01	MarineSediment	10.1007/s00382-003-0316-6	Keigwin, L. D., Sachs, J. P. and Rosenthal, Y.: A 1600-year history of the Labrador Current off Nova Scotia, Climate Dynamics, 21(1), 53–62, doi:10.1007/s00382-003-0316-6, 2003.	10.1038/ngeo2510	McGregor, H. V., Evans, M. N., Goosse, H., Leduc, G., Martrat, B., Addison, J. A., Mortyn, P. G., Oppo, D. W., Seidenkrantz, M.-S., Sicre, M.-A., Phipps, S. J., Selvaraj, K., Thirumalai, K., Filipsson, H. L. and Ersek, V.: Robust global ocean cooling trend for the pre-industrial Common Era, Nature Geoscience, 8(9), 671–677, doi:10.1038/ngeo2510, 2015.	https://www.ncdc.noaa.gov/paleo/study/10891	45.89	-62.8	-250	Emerald Basin,OCE326 MC-29D	351	1950	d18O	permil	carbonate	planktonic foraminifera	N. pachyderma: 150-250	subsurface seawater	Urey, H. C. 1948. Oxygen isotopes in nature and in the laboratory. Science, 108:489?496.	negative	T_water	annual	TRUE	http://lipdverse.org/iso2k/1_0_0/MS03LKNS.html	LJ 20/02/2019
MS03SMAS01	MS03SMAS	MS03SMAS01	MarineSediment	10.1029/2002GL016822	Staubwasser, M., Sirocko, F., Grootes, P. M. and Segl, M.: Climate change at the 4.2 ka BP termination of the Indus valley civilization and Holocene south Asian monsoon variability, Geophysical Research Letters, 30(8), doi:10.1029/2002gl016822, 2003.			https://www.ncdc.noaa.gov/paleo-search/study/2606	24.62	65.98	-316	Arabian Sea	-10804	1990	d18O	permil	carbonate	planktonic foraminifera	G. ruber 315-400	surface seawater	Urey, H. C. 1948. Oxygen isotopes in nature and in the laboratory. Science, 108:489?496.	negative	T_water	annual	TRUE	http://lipdverse.org/iso2k/1_0_0/MS03SMAS.html	LJ 20/02/2019
MS04BLCB02	MS04BLCB	MS04BLCB02	MarineSediment	10.1029/2003PA000982	Black, D. E., Thunell, R. C., Kaplan, A., Peterson, L. C. and Tappa, E. J.: A 2000-year record of Caribbean and tropical North Atlantic hydrographic variability, Paleoceanography, 19(2), n/a–n/a, doi:10.1029/2003pa000982, 2004.	10.1126/science.286.5445.1709	Black, D. E.: Eight Centuries of North Atlantic Ocean Atmosphere Variability, Science, 286(5445), 1709–1713, doi:10.1126/science.286.5445.1709, 1999.	https://www.ncdc.noaa.gov/paleo-search/study/5900	10.75	-64.7	-395	Cariaco Basin	-1.03	1990	d18O	permil	carbonate	planktonic foraminifera	G. ruber pink (212-425)	surface seawater	Urey, H. C. 1948. Oxygen isotopes in nature and in the laboratory. Science, 108:489?496.	negative	T_water	JJASON	TRUE	http://lipdverse.org/iso2k/1_0_0/MS04BLCB.html	LJ 20/02/2019
MS04BLCB01	MS04BLCB	MS04BLCB01	MarineSediment	10.1029/2003PA000982	Black, D. E., Thunell, R. C., Kaplan, A., Peterson, L. C. and Tappa, E. J.: A 2000-year record of Caribbean and tropical North Atlantic hydrographic variability, Paleoceanography, 19(2), n/a–n/a, doi:10.1029/2003pa000982, 2004.	10.1126/science.286.5445.1709	Black, D. E.: Eight Centuries of North Atlantic Ocean Atmosphere Variability, Science, 286(5445), 1709–1713, doi:10.1126/science.286.5445.1709, 1999.	https://www.ncdc.noaa.gov/paleo-search/study/5900	10.75	-64.7	-395	Cariaco Basin	-1.03	1990	d18O	permil	carbonate	planktonic foraminifera	G. bulloides (212-250)	surface seawater	Urey, H. C. 1948. Oxygen isotopes in nature and in the laboratory. Science, 108:489?496.	negative	T_water	DJFMAM	TRUE	http://lipdverse.org/iso2k/1_0_0/MS04BLCB.html	LJ 20/02/2019
MS04ICNI01	MS04ICNI	MS04ICNI01	MarineSediment	10.1002/jqs.841	Castaneda, I. S., Smith, L. M., Kristjansdottir, G. B. and Andrews, J. T.: Temporal changes in Holoceneδ18O records from the northwest and central North Iceland Shelf, Journal of Quaternary Science, 19(4), 321–334, doi:10.1002/jqs.841, 2004.			https://www.ncdc.noaa.gov/paleo-search/study/6423	66.6414	-20.8631	-373	North Iceland	-2336.82	1555.6	d18O	permil	carbonate	planktonic foraminifera	N. pachyderma: 106-1000? not mentioned in paper, but from NOAA data sheet	subsurface seawater	Urey, H. C. 1948. Oxygen isotopes in nature and in the laboratory. Science, 108:489?496.	negative	T_water	annual	TRUE	http://lipdverse.org/iso2k/1_0_0/MS04ICNI.html	LJ 20/02/2019
MS05ESCR01c	MS05ESCR	MS05ESCR01c	MarineSediment	10.1038/nature03945	SchefuSS, E., Schouten, S. and Schneider, R. R.: Climatic controls on central African hydrology during the past 20,000 years, Nature, 437(7061), 1003–1006, doi:10.1038/nature03945, 2005.	10.1016/j.gca.2008.10.016	Weijers, J. W. H., Schouten, S., SchefuSS, E., Schneider, R. R. and Sinninghe Damste, J. S.: Disentangling marine, soil and plant organic carbon contributions to continental margin sediments: A multi-proxy approach in a 20,000 year sediment record from the Congo deep-sea fan, Geochimica et Cosmochimica Acta, 73(1), 119–132, doi:10.1016/j.gca.2008.10.016, 2009.	https://doi.pangaea.de/10.1594/PANGAEA.327243	-5.5883	11.2217	962	Congo River mouth	-17548	1920	d2H	permil	terrestrial biomarker	n-alkane	C29	soil water	Sauer, P. E., Eglinton, T. I., Hayes, J. M., Schimmelmann, A. & Sessions, A. L. Compound-specific D/H ratios of lipid biomarkers from sediments as a proxy for environmental and climatic conditions. Geochim. Cosmochim. Acta 65, 213–222 (2001)	positive	P_isotope	unknown	TRUE	http://lipdverse.org/iso2k/1_0_0/MS05ESCR.html	GF 12/2019, BK 12/31/2019
MS05ESCR01a	MS05ESCR	MS05ESCR01a	MarineSediment	10.1038/nature03945	SchefuSS, E., Schouten, S. and Schneider, R. R.: Climatic controls on central African hydrology during the past 20,000 years, Nature, 437(7061), 1003–1006, doi:10.1038/nature03945, 2005.	10.1016/j.gca.2008.10.016	Weijers, J. W. H., Schouten, S., SchefuSS, E., Schneider, R. R. and Sinninghe Damste, J. S.: Disentangling marine, soil and plant organic carbon contributions to continental margin sediments: A multi-proxy approach in a 20,000 year sediment record from the Congo deep-sea fan, Geochimica et Cosmochimica Acta, 73(1), 119–132, doi:10.1016/j.gca.2008.10.016, 2009.	https://doi.pangaea.de/10.1594/PANGAEA.327243	-5.5883	11.2217	962	Congo River mouth	-17548	1920	d18O	permil	carbonate	planktonic foraminifera	G. ruber (white) >150	surface seawater	Urey, H. C. 1948. Oxygen isotopes in nature and in the laboratory. Science, 108:489-496.	negative	T_water	annual	TRUE	http://lipdverse.org/iso2k/1_0_0/MS05ESCR.html	GF 12/2019
MS05LKLF01a	MS05LKLF	MS05LKLF01a	MarineSediment	10.1029/2004PA001074	Keigwin, L. D., Sachs, J. P., Rosenthal, Y. and Boyle, E. A.: The 8200 year B.P. event in the slope water system, western subpolar North Atlantic, Paleoceanography, 20(2), n/a–n/a, doi:10.1029/2004pa001074, 2005.	10.1038/ngeo2510	McGregor, H. V., Evans, M. N., Goosse, H., Leduc, G., Martrat, B., Addison, J. A., Mortyn, P. G., Oppo, D. W., Seidenkrantz, M.-S., Sicre, M.-A., Phipps, S. J., Selvaraj, K., Thirumalai, K., Filipsson, H. L. and Ersek, V.: Robust global ocean cooling trend for the pre-industrial Common Era, Nature Geoscience, 8(9), 671–677, doi:10.1038/ngeo2510, 2015.	https://www.ncdc.noaa.gov/paleo-search/study/5966	43.48	-54.87	-3975	Laurentian Fan, western subpolar North Atlantic	251.33	1930.19	d18O	permil	carbonate	planktonic foraminifera	N. pachyderma: size probably 150-250	subsurface seawater	Urey, H. C. 1948. Oxygen isotopes in nature and in the laboratory. Science, 108:489?496.	negative	T_water	annual	TRUE	http://lipdverse.org/iso2k/1_0_0/MS05LKLF.html	LJ
MS06DLDS01b	MS06DLDS	MS06DLDS01b	MarineSediment	10.1029/2005PA001218	Lund, D. C. and Curry, W.: Florida Current surface temperature and salinity variability during the last millennium, Paleoceanography, 21(2), n/a–n/a, doi:10.1029/2005pa001218, 2006.	10.1038/ngeo2510	McGregor, H. V., Evans, M. N., Goosse, H., Leduc, G., Martrat, B., Addison, J. A., Mortyn, P. G., Oppo, D. W., Seidenkrantz, M.-S., Sicre, M.-A., Phipps, S. J., Selvaraj, K., Thirumalai, K., Filipsson, H. L. and Ersek, V.: Robust global ocean cooling trend for the pre-industrial Common Era, Nature Geoscience, 8(9), 671–677, doi:10.1038/ngeo2510, 2015.	https://www.ncdc.noaa.gov/paleo/study/5968	24.33	-83.26	-547	Dry Tortugas, 62MC	995	1925.2	d18O	permil	inferred seawater		inferred from G. ruber (white) d18O and Mg/Ca	surface seawater		positive	d18O_seawater	annual	TRUE	http://lipdverse.org/iso2kv0_10_0/MS06DLDS.html	LJ 20/02/2019
MS06DLDS01a	MS06DLDS	MS06DLDS01a	MarineSediment	10.1029/2005PA001218	Lund, D. C. and Curry, W.: Florida Current surface temperature and salinity variability during the last millennium, Paleoceanography, 21(2), n/a–n/a, doi:10.1029/2005pa001218, 2006.	10.1038/ngeo2510	McGregor, H. V., Evans, M. N., Goosse, H., Leduc, G., Martrat, B., Addison, J. A., Mortyn, P. G., Oppo, D. W., Seidenkrantz, M.-S., Sicre, M.-A., Phipps, S. J., Selvaraj, K., Thirumalai, K., Filipsson, H. L. and Ersek, V.: Robust global ocean cooling trend for the pre-industrial Common Era, Nature Geoscience, 8(9), 671–677, doi:10.1038/ngeo2510, 2015.	https://www.ncdc.noaa.gov/paleo/study/5968	24.33	-83.26	-547	Dry Tortugas, 62MC	995	1925.2	d18O	permil	carbonate	planktonic foraminifera	G. ruber (white) 212-250	surface seawater	Urey, H. C. 1948. Oxygen isotopes in nature and in the laboratory. Science, 108:489?496.	negative	T_water	annual	TRUE	http://lipdverse.org/iso2kv0_10_0/MS06DLDS.html	LJ 20/02/2019
MS06DLGN01b	MS06DLGN	MS06DLGN01b	MarineSediment	10.1029/2005PA001218	Lund, D. C. and Curry, W.: Florida Current surface temperature and salinity variability during the last millennium, Paleoceanography, 21(2), n/a–n/a, doi:10.1029/2005pa001218, 2006.	10.1038/ngeo2510	McGregor, H. V., Evans, M. N., Goosse, H., Leduc, G., Martrat, B., Addison, J. A., Mortyn, P. G., Oppo, D. W., Seidenkrantz, M.-S., Sicre, M.-A., Phipps, S. J., Selvaraj, K., Thirumalai, K., Filipsson, H. L. and Ersek, V.: Robust global ocean cooling trend for the pre-industrial Common Era, Nature Geoscience, 8(9), 671–677, doi:10.1038/ngeo2510, 2015.	https://www.ncdc.noaa.gov/paleo/study/5968	24.76	-79.29	-694	Great Bahama Bank north	590	1950	d18O	permil	inferred seawater		inferred from G. ruber (white) d18O and Mg/Ca	surface seawater		positive	d18O_seawater	annual	TRUE	http://lipdverse.org/iso2kv0_10_0/MS06DLGN.html	LJ 20/02/2019
MS06DLGN01a	MS06DLGN	MS06DLGN01a	MarineSediment	10.1029/2005PA001218	Lund, D. C. and Curry, W.: Florida Current surface temperature and salinity variability during the last millennium, Paleoceanography, 21(2), n/a–n/a, doi:10.1029/2005pa001218, 2006.	10.1038/ngeo2510	McGregor, H. V., Evans, M. N., Goosse, H., Leduc, G., Martrat, B., Addison, J. A., Mortyn, P. G., Oppo, D. W., Seidenkrantz, M.-S., Sicre, M.-A., Phipps, S. J., Selvaraj, K., Thirumalai, K., Filipsson, H. L. and Ersek, V.: Robust global ocean cooling trend for the pre-industrial Common Era, Nature Geoscience, 8(9), 671–677, doi:10.1038/ngeo2510, 2015.	https://www.ncdc.noaa.gov/paleo/study/5968	24.76	-79.29	-694	Great Bahama Bank north	590	1950	d18O	permil	carbonate	planktonic foraminifera	G. ruber (white) 212-250	surface seawater	Urey, H. C. 1948. Oxygen isotopes in nature and in the laboratory. Science, 108:489?496.	negative	T_water	annual	TRUE	http://lipdverse.org/iso2kv0_10_0/MS06DLGN.html	LJ 20/02/2019
MS06DLGS01b	MS06DLGS	MS06DLGS01b	MarineSediment	10.1029/2005PA001218	Lund, D. C. and Curry, W.: Florida Current surface temperature and salinity variability during the last millennium, Paleoceanography, 21(2), n/a–n/a, doi:10.1029/2005pa001218, 2006.	10.1038/ngeo2510	McGregor, H. V., Evans, M. N., Goosse, H., Leduc, G., Martrat, B., Addison, J. A., Mortyn, P. G., Oppo, D. W., Seidenkrantz, M.-S., Sicre, M.-A., Phipps, S. J., Selvaraj, K., Thirumalai, K., Filipsson, H. L. and Ersek, V.: Robust global ocean cooling trend for the pre-industrial Common Era, Nature Geoscience, 8(9), 671–677, doi:10.1038/ngeo2510, 2015.	https://www.ncdc.noaa.gov/paleo/study/5968	24.59	-79.27	-531	Great Bahama Bank south 118MC	1065	1950	d18O	permil	inferred seawater		inferred from G. ruber (white) d18O and Mg/Ca	surface seawater		positive	d18O_seawater	annual	TRUE	http://lipdverse.org/iso2kv0_10_0/MS06DLGS.html	LJ 20/02/2019
MS06DLGS01a	MS06DLGS	MS06DLGS01a	MarineSediment	10.1029/2005PA001218	Lund, D. C. and Curry, W.: Florida Current surface temperature and salinity variability during the last millennium, Paleoceanography, 21(2), n/a–n/a, doi:10.1029/2005pa001218, 2006.	10.1038/ngeo2510	McGregor, H. V., Evans, M. N., Goosse, H., Leduc, G., Martrat, B., Addison, J. A., Mortyn, P. G., Oppo, D. W., Seidenkrantz, M.-S., Sicre, M.-A., Phipps, S. J., Selvaraj, K., Thirumalai, K., Filipsson, H. L. and Ersek, V.: Robust global ocean cooling trend for the pre-industrial Common Era, Nature Geoscience, 8(9), 671–677, doi:10.1038/ngeo2510, 2015.	https://www.ncdc.noaa.gov/paleo/study/5968	24.59	-79.27	-531	Great Bahama Bank south 118MC	1065	1950	d18O	permil	carbonate	planktonic foraminifera	G. ruber (white) 212-250	surface seawater	Urey, H. C. 1948. Oxygen isotopes in nature and in the laboratory. Science, 108:489?496.	negative	T_water	annual	TRUE	http://lipdverse.org/iso2kv0_10_0/MS06DLGS.html	LJ 20/02/2019
WEB2606fc74	MS07JRGM	MS07JRGM01	MarineSediment	10.1130/G23507A.1	Richey, J. N., Poore, R. Z., Flower, B. P. and Quinn, T. M.: 1400 yr multiproxy record of climate variability from the northern Gulf of Mexico, Geology, 35(5), 423, doi:10.1130/g23507a.1, 2007.	10.1038/ngeo2510	McGregor, H. V., Evans, M. N., Goosse, H., Leduc, G., Martrat, B., Addison, J. A., Mortyn, P. G., Oppo, D. W., Seidenkrantz, M.-S., Sicre, M.-A., Phipps, S. J., Selvaraj, K., Thirumalai, K., Filipsson, H. L. and Ersek, V.: Robust global ocean cooling trend for the pre-industrial Common Era, Nature Geoscience, 8(9), 671–677, doi:10.1038/ngeo2510, 2015.	https://www.ncdc.noaa.gov/paleo/study/5584	27.2	-91.42	-2259	Gulf of Mexico	494.706	1950	d18O	permil	inferred seawater		inferred from G. ruber (white) d18O and Mg/Ca	surface seawater		positive	d18O_seawater	annual	TRUE	http://lipdverse.org/iso2k/1_0_0/MS07JRGM.html	LJ 20/02/2019
MS07JRGM01aa	MS07JRGM	MS07JRGM01a	MarineSediment	10.1130/G23507A.1	Richey, J. N., Poore, R. Z., Flower, B. P. and Quinn, T. M.: 1400 yr multiproxy record of climate variability from the northern Gulf of Mexico, Geology, 35(5), 423, doi:10.1130/g23507a.1, 2007.	10.1038/ngeo2510	McGregor, H. V., Evans, M. N., Goosse, H., Leduc, G., Martrat, B., Addison, J. A., Mortyn, P. G., Oppo, D. W., Seidenkrantz, M.-S., Sicre, M.-A., Phipps, S. J., Selvaraj, K., Thirumalai, K., Filipsson, H. L. and Ersek, V.: Robust global ocean cooling trend for the pre-industrial Common Era, Nature Geoscience, 8(9), 671–677, doi:10.1038/ngeo2510, 2015.	https://www.ncdc.noaa.gov/paleo/study/5584	27.2	-91.42	-2259	Gulf of Mexico	494.706	1950	d18O	permil	carbonate	planktonic foraminifera	G. ruber (white) 250-300	surface seawater	Urey, H. C. 1948. Oxygen isotopes in nature and in the laboratory. Science, 108:489?496.	negative	T_water	annual	TRUE	http://lipdverse.org/iso2k/1_0_0/MS07JRGM.html	LJ 20/02/2019
MS07KPPB002	MS07KPPB	MS07KPPB002	MarineSediment	10.1029/2007PA001468	Pahnke, K., Sachs, J. P., Keigwin, L., Timmermann, A. and Xie, S.-P.: Eastern tropical Pacific hydrologic changes during the past 27,000 years from D/H ratios in alkenones, Paleoceanography, 22(4), n/a–n/a, doi:10.1029/2007pa001468, 2007.			https://www.ncdc.noaa.gov/paleo/study/12916	35.5	9.5	-884	Panama Basin	1646.5	1945.33	d2H	permil	aquatic biomarker	alkenones	total C37 alkenones	surface seawater	dD values measured in alkenones from marine sediments can be used to reconstruct past changes in freshwater supply to the ocean and hence precipitation and river runoff.	positive	P_isotope	JJA	TRUE	http://lipdverse.org/iso2k/1_0_0/MS07KPPB.html	GF 12/2019
MS07KPPB0022	MS07KPPB	MS07KPPB002	MarineSediment	10.1029/2007PA001468	Pahnke, K., Sachs, J. P., Keigwin, L., Timmermann, A. and Xie, S.-P.: Eastern tropical Pacific hydrologic changes during the past 27,000 years from D/H ratios in alkenones, Paleoceanography, 22(4), n/a–n/a, doi:10.1029/2007pa001468, 2007.			https://www.ncdc.noaa.gov/paleo/study/12916	35.5	9.5	-884	Panama Basin	1550.65	1944.53	d2H	permil	aquatic biomarker	alkenones	total C37 alkenones	surface seawater	dD values measured in alkenones from marine sediments can be used to reconstruct past changes in freshwater supply to the ocean and hence precipitation and river runoff.	positive	P_isotope	JJA	TRUE	http://lipdverse.org/iso2k/1_0_0/MS07KPPB.html	GF 12/2019
MS07LSPG01b	MS07LSPG	MS07LSPG01b	MarineSediment	10.1126/science.1143791	Stott, L., Timmermann, A. and Thunell, R.: Southern Hemisphere and Deep-Sea Warming Led Deglacial Atmospheric CO2 Rise and Tropical Warming, Science, 318(5849), 435–438, doi:10.1126/science.1143791, 2007.	10.1038/ngeo2510	McGregor, H. V., Evans, M. N., Goosse, H., Leduc, G., Martrat, B., Addison, J. A., Mortyn, P. G., Oppo, D. W., Seidenkrantz, M.-S., Sicre, M.-A., Phipps, S. J., Selvaraj, K., Thirumalai, K., Filipsson, H. L. and Ersek, V.: Robust global ocean cooling trend for the pre-industrial Common Era, Nature Geoscience, 8(9), 671–677, doi:10.1038/ngeo2510, 2015.	https://www.ncdc.noaa.gov/paleo/study/5917	-5	133.44	-2382	WEq Pacific	-18383	1824.3	d18O	permil	inferred seawater		inferred from G. ruber (white) d18O and Mg/Ca	surface seawater		positive	d18O_seawater	annual	TRUE	http://lipdverse.org/iso2k/1_0_0/MS07LSPG.html	LJ 20/02/2019
MS07LSPG01a	MS07LSPG	MS07LSPG01a	MarineSediment	10.1126/science.1143791	Stott, L., Timmermann, A. and Thunell, R.: Southern Hemisphere and Deep-Sea Warming Led Deglacial Atmospheric CO2 Rise and Tropical Warming, Science, 318(5849), 435–438, doi:10.1126/science.1143791, 2007.	10.1038/ngeo2510	McGregor, H. V., Evans, M. N., Goosse, H., Leduc, G., Martrat, B., Addison, J. A., Mortyn, P. G., Oppo, D. W., Seidenkrantz, M.-S., Sicre, M.-A., Phipps, S. J., Selvaraj, K., Thirumalai, K., Filipsson, H. L. and Ersek, V.: Robust global ocean cooling trend for the pre-industrial Common Era, Nature Geoscience, 8(9), 671–677, doi:10.1038/ngeo2510, 2015.	https://www.ncdc.noaa.gov/paleo/study/5917	-5	133.44	-2382	WEq Pacific	-18383	1824.3	d18O	permil	carbonate	planktonic foraminifera	G. ruber (white) size not provided	surface seawater	Urey, H. C. 1948. Oxygen isotopes in nature and in the laboratory. Science, 108:489?496.	negative	T_water	annual	TRUE	http://lipdverse.org/iso2k/1_0_0/MS07LSPG.html	LJ 20/02/2019
MS07LSSP01b	MS07LSSP	MS07LSSP01b	MarineSediment	10.1126/science.1143791	Stott, L., Timmermann, A. and Thunell, R.: Southern Hemisphere and Deep-Sea Warming Led Deglacial Atmospheric CO2 Rise and Tropical Warming, Science, 318(5849), 435–438, doi:10.1126/science.1143791, 2007.	10.1038/ngeo2510	McGregor, H. V., Evans, M. N., Goosse, H., Leduc, G., Martrat, B., Addison, J. A., Mortyn, P. G., Oppo, D. W., Seidenkrantz, M.-S., Sicre, M.-A., Phipps, S. J., Selvaraj, K., Thirumalai, K., Filipsson, H. L. and Ersek, V.: Robust global ocean cooling trend for the pre-industrial Common Era, Nature Geoscience, 8(9), 671–677, doi:10.1038/ngeo2510, 2015.	https://www.ncdc.noaa.gov/paleo/study/6400	6.3	125.83	-2114	Southern Philippines	-19919	1947.4	d18O	permil	inferred seawater		inferred from G. ruber (white) d18O and Mg/Ca	surface seawater		positive	d18O_seawater	annual	TRUE	http://lipdverse.org/iso2k/1_0_0/MS07LSSP.html	LJ 20/02/2019
MS07LSSP01a	MS07LSSP	MS07LSSP01a	MarineSediment	10.1126/science.1143791	Stott, L., Timmermann, A. and Thunell, R.: Southern Hemisphere and Deep-Sea Warming Led Deglacial Atmospheric CO2 Rise and Tropical Warming, Science, 318(5849), 435–438, doi:10.1126/science.1143791, 2007.	10.1038/ngeo2510	McGregor, H. V., Evans, M. N., Goosse, H., Leduc, G., Martrat, B., Addison, J. A., Mortyn, P. G., Oppo, D. W., Seidenkrantz, M.-S., Sicre, M.-A., Phipps, S. J., Selvaraj, K., Thirumalai, K., Filipsson, H. L. and Ersek, V.: Robust global ocean cooling trend for the pre-industrial Common Era, Nature Geoscience, 8(9), 671–677, doi:10.1038/ngeo2510, 2015.	https://www.ncdc.noaa.gov/paleo/study/6400	6.3	125.83	-2114	Southern Philippines	-19919	1947.4	d18O	permil	carbonate	planktonic foraminifera	G. ruber ss (white) size not provided	surface seawater	Urey, H. C. 1948. Oxygen isotopes in nature and in the laboratory. Science, 108:489?496.	negative	T_water	annual	TRUE	http://lipdverse.org/iso2k/1_0_0/MS07LSSP.html	LJ 20/02/2019
MS07MMNP01a	MS07MMNP	MS07MMNP01a	MarineSediment	10.1016/j.quascirev.2006.12.008	Mohtadi, M., Romero, O. E., Kaiser, J. and Hebbeln, D.: Cooling of the southern high latitudes during the Medieval Period and its effect on ENSO, Quaternary Science Reviews, 26(7-8), 1055–1066, doi:10.1016/j.quascirev.2006.12.008, 2007.	10.1038/ngeo2510	McGregor, H. V., Evans, M. N., Goosse, H., Leduc, G., Martrat, B., Addison, J. A., Mortyn, P. G., Oppo, D. W., Seidenkrantz, M.-S., Sicre, M.-A., Phipps, S. J., Selvaraj, K., Thirumalai, K., Filipsson, H. L. and Ersek, V.: Robust global ocean cooling trend for the pre-industrial Common Era, Nature Geoscience, 8(9), 671–677, doi:10.1038/ngeo2510, 2015.	http://doi.pangaea.de/10.1594/PANGAEA.676709	-44.15	-75.16	-1169	Southern Chile Margin	-167.5	1988.46	d18O	permil	carbonate	planktonic foraminifera	N. incompta size not provided	subsurface seawater	Urey, H. C. 1948. Oxygen isotopes in nature and in the laboratory. Science, 108:489?496.	negative	T_water	annual	TRUE	http://lipdverse.org/iso2k/1_0_0/MS07MMNP.html	LJ
MS07MMNP01b	MS07MMNP	MS07MMNP01b	MarineSediment	10.1016/j.quascirev.2006.12.008	Mohtadi, M., Romero, O. E., Kaiser, J. and Hebbeln, D.: Cooling of the southern high latitudes during the Medieval Period and its effect on ENSO, Quaternary Science Reviews, 26(7-8), 1055–1066, doi:10.1016/j.quascirev.2006.12.008, 2007.	10.1038/ngeo2510	McGregor, H. V., Evans, M. N., Goosse, H., Leduc, G., Martrat, B., Addison, J. A., Mortyn, P. G., Oppo, D. W., Seidenkrantz, M.-S., Sicre, M.-A., Phipps, S. J., Selvaraj, K., Thirumalai, K., Filipsson, H. L. and Ersek, V.: Robust global ocean cooling trend for the pre-industrial Common Era, Nature Geoscience, 8(9), 671–677, doi:10.1038/ngeo2510, 2015.	http://doi.pangaea.de/10.1594/PANGAEA.676709	-44.15	-75.16	-1169	Southern Chile Margin	-167.5	1900.5	d18O	permil	inferred seawater			seawater		positive	d18O_seawater	annual	TRUE	http://lipdverse.org/iso2k/1_0_0/MS07MMNP.html
MS07RCNA02	MS07RCNA	MS07RCNA02	MarineSediment	10.1130/G23455A.1	Came, R. E., Oppo, D. W. and McManus, J. F.: Amplitude and timing of temperature and salinity variability in the subpolar North Atlantic over the past 10 k.y., Geology, 35(4), 315, doi:10.1130/g23455a.1, 2007.			https://www.ncdc.noaa.gov/paleo-search/study/11196	61.43	-24.08	-1649	subpolar N. Atl	-9149.5	1504	d18O	permil	carbonate	planktonic foraminifera	N. incompta 150-212	subsurface seawater	Urey, H. C. 1948. Oxygen isotopes in nature and in the laboratory. Science, 108:489?496.	negative	T_water	annual	TRUE	http://lipdverse.org/iso2k/1_0_0/MS07RCNA.html	LJ 12/12/2018
MS07SWGG01b	MS07SWGG	MS07SWGG01b	MarineSediment	10.1126/science.1140461	Weldeab, S., Lea, D. W., Schneider, R. R. and Andersen, N.: 155,000 Years of West African Monsoon and Ocean Thermal Evolution, Science, 316(5829), 1303–1307, doi:10.1126/science.1140461, 2007.	10.1038/ngeo2510	McGregor, H. V., Evans, M. N., Goosse, H., Leduc, G., Martrat, B., Addison, J. A., Mortyn, P. G., Oppo, D. W., Seidenkrantz, M.-S., Sicre, M.-A., Phipps, S. J., Selvaraj, K., Thirumalai, K., Filipsson, H. L. and Ersek, V.: Robust global ocean cooling trend for the pre-industrial Common Era, Nature Geoscience, 8(9), 671–677, doi:10.1038/ngeo2510, 2015.	https://www.ncdc.noaa.gov/paleo/study/5596	2.5	9.38	-1295	Gulf of Guinea, EEA	-153680	1590	d18O	permil	inferred seawater		inferred from G. ruber (pink) d18O and Mg/Ca	surface seawater		positive	d18O_seawater	annual	TRUE	http://lipdverse.org/iso2k/1_0_0/MS07SWGG.html	LJ 12/12/2018
MS07SWGG01a	MS07SWGG	MS07SWGG01a	MarineSediment	10.1126/science.1140461	Weldeab, S., Lea, D. W., Schneider, R. R. and Andersen, N.: 155,000 Years of West African Monsoon and Ocean Thermal Evolution, Science, 316(5829), 1303–1307, doi:10.1126/science.1140461, 2007.	10.1038/ngeo2510	McGregor, H. V., Evans, M. N., Goosse, H., Leduc, G., Martrat, B., Addison, J. A., Mortyn, P. G., Oppo, D. W., Seidenkrantz, M.-S., Sicre, M.-A., Phipps, S. J., Selvaraj, K., Thirumalai, K., Filipsson, H. L. and Ersek, V.: Robust global ocean cooling trend for the pre-industrial Common Era, Nature Geoscience, 8(9), 671–677, doi:10.1038/ngeo2510, 2015.	https://www.ncdc.noaa.gov/paleo/study/5596	2.5	9.38	-1295	Gulf of Guinea, EEA	-153680	1590	d18O	permil	carbonate	planktonic foraminifera	G. ruber (pink) 250-300	surface seawater	Urey, H. C. 1948. Oxygen isotopes in nature and in the laboratory. Science, 108:489?496.	negative	T_water	annual	TRUE	http://lipdverse.org/iso2k/1_0_0/MS07SWGG.html	LJ 20/02/2019
LPDfaa61777t	MS07SWGG	MS07SWGG01	MarineSediment	10.1126/science.1140461	Weldeab, S., Lea, D. W., Schneider, R. R. and Andersen, N.: 155,000 Years of West African Monsoon and Ocean Thermal Evolution, Science, 316(5829), 1303–1307, doi:10.1126/science.1140461, 2007.	10.1038/ngeo2510	McGregor, H. V., Evans, M. N., Goosse, H., Leduc, G., Martrat, B., Addison, J. A., Mortyn, P. G., Oppo, D. W., Seidenkrantz, M.-S., Sicre, M.-A., Phipps, S. J., Selvaraj, K., Thirumalai, K., Filipsson, H. L. and Ersek, V.: Robust global ocean cooling trend for the pre-industrial Common Era, Nature Geoscience, 8(9), 671–677, doi:10.1038/ngeo2510, 2015.	https://www.ncdc.noaa.gov/paleo/study/5596	2.5	9.38	-1295	Gulf of Guinea, EEA	-8320	1710	d2H	permil	aquatic biomarker	alkenones	C37:2 alkenones	surface seawater	Our results illustrate that changes in atmospheric circulation can trigger changes in precipitation isotopes in a counter-intuitive manner that ultimately impacts surface salinity estimates based on seawater isotopic values.	positive	d18O_seawater	JJA	TRUE	http://lipdverse.org/iso2k/1_0_0/MS07SWGG.html	GL and LJ
MS08UAPM01	MS08UAPM	MS08UAPM01	MarineSediment	10.1016/j.margeo.2008.11.008	Alt-Epping, U., Stuut, J.-B. W., Hebbeln, D. and Schneider, R.: Variations in sediment provenance during the past 3000 years off the Tagus River, Portugal, Marine Geology, 261(1-4), 82–91, doi:10.1016/j.margeo.2008.11.008, 2009.			https://doi.pangaea.de/10.1594/PANGAEA.717637	38.625	-9.5083	-102	Portuguese Margin	-1159	1996	d18O	permil	carbonate	planktonic foraminifera	G. bulloides	surface seawater	Urey, H. C. 1948. Oxygen isotopes in nature and in the laboratory. Science, 108:489?496.	negative	T_water	annual	TRUE	http://lipdverse.org/iso2k/1_0_0/MS08UAPM.html	LJ
MS09DOIP01b	MS09DOIP	MS09DOIP01b	MarineSediment	10.1038/nature08233	Oppo, D. W., Rosenthal, Y. and Linsley, B. K.: 2,000-year-long temperature and hydrology reconstructions from the Indo-Pacific warm pool, Nature, 460(7259), 1113–1116, doi:10.1038/nature08233, 2009.	10.1038/ngeo2510	McGregor, H. V., Evans, M. N., Goosse, H., Leduc, G., Martrat, B., Addison, J. A., Mortyn, P. G., Oppo, D. W., Seidenkrantz, M.-S., Sicre, M.-A., Phipps, S. J., Selvaraj, K., Thirumalai, K., Filipsson, H. L. and Ersek, V.: Robust global ocean cooling trend for the pre-industrial Common Era, Nature Geoscience, 8(9), 671–677, doi:10.1038/ngeo2510, 2015.	https://www.ncdc.noaa.gov/paleo/study/8699	-3.53	119.2	-503	Makassar Strait	-365.7	1986.64	d18O	permil	inferred seawater		inferred from G. ruber (white) d18O and Mg/Ca	surface seawater		positive	d18O_seawater	annual	TRUE	http://lipdverse.org/iso2k/1_0_0/MS09DOIP.html	LJ 12/12/2018
MS09DOIP01a	MS09DOIP	MS09DOIP01a	MarineSediment	10.1038/nature08233	Oppo, D. W., Rosenthal, Y. and Linsley, B. K.: 2,000-year-long temperature and hydrology reconstructions from the Indo-Pacific warm pool, Nature, 460(7259), 1113–1116, doi:10.1038/nature08233, 2009.	10.1038/ngeo2510	McGregor, H. V., Evans, M. N., Goosse, H., Leduc, G., Martrat, B., Addison, J. A., Mortyn, P. G., Oppo, D. W., Seidenkrantz, M.-S., Sicre, M.-A., Phipps, S. J., Selvaraj, K., Thirumalai, K., Filipsson, H. L. and Ersek, V.: Robust global ocean cooling trend for the pre-industrial Common Era, Nature Geoscience, 8(9), 671–677, doi:10.1038/ngeo2510, 2015.	https://www.ncdc.noaa.gov/paleo/study/8699	-3.53	119.2	-503	Makassar Strait	-365.7	1986.64	d18O	permil	carbonate	planktonic foraminifera	G. ruber (white) 212-250	surface seawater	Urey, H. C. 1948. Oxygen isotopes in nature and in the laboratory. Science, 108:489?496.	negative	T_water	annual	TRUE	http://lipdverse.org/iso2k/1_0_0/MS09DOIP.html	LJ 20/02/2019
MS09DTNA02b	MS09DTNA	MS09DTNA02b	MarineSediment	10.1038/nature07717	Thornalley, D. J. R., Elderfield, H. and McCave, I. N.: Holocene oscillations in temperature and salinity of the surface subpolar North Atlantic, Nature, 457(7230), 711–714, doi:10.1038/nature07717, 2009.	10.1038/ngeo2510	McGregor, H. V., Evans, M. N., Goosse, H., Leduc, G., Martrat, B., Addison, J. A., Mortyn, P. G., Oppo, D. W., Seidenkrantz, M.-S., Sicre, M.-A., Phipps, S. J., Selvaraj, K., Thirumalai, K., Filipsson, H. L. and Ersek, V.: Robust global ocean cooling trend for the pre-industrial Common Era, Nature Geoscience, 8(9), 671–677, doi:10.1038/ngeo2510, 2015.	https://www.ncdc.noaa.gov/paleo/study/8623	62.08	-17.82	1938	RApiD-12-1K Subpolar North Atlantic	-9918.5	1950	d18O	permil	inferred seawater		inferred from G. inflata d18O and Mg/Ca	subsurface seawater		positive	d18O_seawater		TRUE	http://lipdverse.org/iso2k/1_0_0/MS09DTNA.html	LJ 20/02/2019
MS09DTNA01b	MS09DTNA	MS09DTNA01b	MarineSediment	10.1038/nature07717	Thornalley, D. J. R., Elderfield, H. and McCave, I. N.: Holocene oscillations in temperature and salinity of the surface subpolar North Atlantic, Nature, 457(7230), 711–714, doi:10.1038/nature07717, 2009.	10.1038/ngeo2510	McGregor, H. V., Evans, M. N., Goosse, H., Leduc, G., Martrat, B., Addison, J. A., Mortyn, P. G., Oppo, D. W., Seidenkrantz, M.-S., Sicre, M.-A., Phipps, S. J., Selvaraj, K., Thirumalai, K., Filipsson, H. L. and Ersek, V.: Robust global ocean cooling trend for the pre-industrial Common Era, Nature Geoscience, 8(9), 671–677, doi:10.1038/ngeo2510, 2015.	https://www.ncdc.noaa.gov/paleo/study/8623	62.08	-17.82	1938	RApiD-12-1K Subpolar North Atlantic	-9918.5	1950	d18O	permil	inferred seawater		inferred from G. bulloides d18O and Mg/Ca	surface seawater		positive	d18O_seawater		TRUE	http://lipdverse.org/iso2k/1_0_0/MS09DTNA.html	LJ 20/02/2019
MS09DTNA02a	MS09DTNA	MS09DTNA02a	MarineSediment	10.1038/nature07717	Thornalley, D. J. R., Elderfield, H. and McCave, I. N.: Holocene oscillations in temperature and salinity of the surface subpolar North Atlantic, Nature, 457(7230), 711–714, doi:10.1038/nature07717, 2009.	10.1038/ngeo2510	McGregor, H. V., Evans, M. N., Goosse, H., Leduc, G., Martrat, B., Addison, J. A., Mortyn, P. G., Oppo, D. W., Seidenkrantz, M.-S., Sicre, M.-A., Phipps, S. J., Selvaraj, K., Thirumalai, K., Filipsson, H. L. and Ersek, V.: Robust global ocean cooling trend for the pre-industrial Common Era, Nature Geoscience, 8(9), 671–677, doi:10.1038/ngeo2510, 2015.	https://www.ncdc.noaa.gov/paleo/study/8623	62.08	-17.82	1938	RApiD-12-1K Subpolar North Atlantic	-9918.5	1950	d18O	permil	carbonate	planktonic foraminifera	G. inflata 300-355	subsurface seawater	Urey, H. C. 1948. Oxygen isotopes in nature and in the laboratory. Science, 108:489?496.	negative	T_water		TRUE	http://lipdverse.org/iso2k/1_0_0/MS09DTNA.html	LJ 20/02/2019
MS09DTNA01a	MS09DTNA	MS09DTNA01	MarineSediment	10.1038/nature07717	Thornalley, D. J. R., Elderfield, H. and McCave, I. N.: Holocene oscillations in temperature and salinity of the surface subpolar North Atlantic, Nature, 457(7230), 711–714, doi:10.1038/nature07717, 2009.	10.1038/ngeo2510	McGregor, H. V., Evans, M. N., Goosse, H., Leduc, G., Martrat, B., Addison, J. A., Mortyn, P. G., Oppo, D. W., Seidenkrantz, M.-S., Sicre, M.-A., Phipps, S. J., Selvaraj, K., Thirumalai, K., Filipsson, H. L. and Ersek, V.: Robust global ocean cooling trend for the pre-industrial Common Era, Nature Geoscience, 8(9), 671–677, doi:10.1038/ngeo2510, 2015.	https://www.ncdc.noaa.gov/paleo/study/8623	62.08	-17.82	1938	RApiD-12-1K Subpolar North Atlantic	-9918.5	1950	d18O	permil	carbonate	planktonic foraminifera	G. bulloides	surface seawater	Urey, H. C. 1948. Oxygen isotopes in nature and in the laboratory. Science, 108:489?496.	negative	T_water		TRUE	http://lipdverse.org/iso2k/1_0_0/MS09DTNA.html	LJ 20/02/2019
MS09TCIS01	MS09TCIS	MS09TCIS01	MarineSediment	10.5194/cp-5-171-2009	Taricco, C., Ghil, M., Alessio, S. and Vivaldo, G.: Two millennia of climate variability in the Central Mediterranean, Climate of the Past, 5(2), 171–181, doi:10.5194/cp-5-171-2009, 2009.			https://doi.pangaea.de/10.1594/PANGAEA.857573	39.7619	17.8986	178	Ionian Sea	-188.2	1975.13	d18O	permil	carbonate	planktonic foraminifera	G. ruber (150-300)	surface seawater	Urey, H. C. 1948. Oxygen isotopes in nature and in the laboratory. Science, 108:489?496.	negative	T_water	annual	TRUE	http://lipdverse.org/iso2k/1_0_0/MS09TCIS.html	LJ 12/12/2018
MS09TRFD01b	MS09TRFD	MS09TRFD01b	MarineSediment	10.1016/j.quascirev.2009.04.008	Richter, T. O., Peeters, F. J. C. and van Weering, T. C. E.: Late Holocene (0–2.4kaBP) surface water temperature and salinity variability, Feni Drift, NE Atlantic Ocean, Quaternary Science Reviews, 28(19-20), 1941–1955, doi:10.1016/j.quascirev.2009.04.008, 2009.	10.1038/ngeo2510	McGregor, H. V., Evans, M. N., Goosse, H., Leduc, G., Martrat, B., Addison, J. A., Mortyn, P. G., Oppo, D. W., Seidenkrantz, M.-S., Sicre, M.-A., Phipps, S. J., Selvaraj, K., Thirumalai, K., Filipsson, H. L. and Ersek, V.: Robust global ocean cooling trend for the pre-industrial Common Era, Nature Geoscience, 8(9), 671–677, doi:10.1038/ngeo2510, 2015.	https://www.ncdc.noaa.gov/paleo/study/8725	55.5	-13.9	-2543	Feni Drift	-368	1998	d18O	permil	inferred seawater		inferred from G. bulloides d18O and Mg/Ca	surface seawater		positive	d18O_seawater	annual	TRUE	http://lipdverse.org/iso2k/1_0_0/MS09TRFD.html	LJ 12/12/2018
MS09TRFD01a	MS09TRFD	MS09TRFD01a	MarineSediment	10.1016/j.quascirev.2009.04.008	Richter, T. O., Peeters, F. J. C. and van Weering, T. C. E.: Late Holocene (0–2.4kaBP) surface water temperature and salinity variability, Feni Drift, NE Atlantic Ocean, Quaternary Science Reviews, 28(19-20), 1941–1955, doi:10.1016/j.quascirev.2009.04.008, 2009.	10.1038/ngeo2510	McGregor, H. V., Evans, M. N., Goosse, H., Leduc, G., Martrat, B., Addison, J. A., Mortyn, P. G., Oppo, D. W., Seidenkrantz, M.-S., Sicre, M.-A., Phipps, S. J., Selvaraj, K., Thirumalai, K., Filipsson, H. L. and Ersek, V.: Robust global ocean cooling trend for the pre-industrial Common Era, Nature Geoscience, 8(9), 671–677, doi:10.1038/ngeo2510, 2015.	https://www.ncdc.noaa.gov/paleo/study/8725	55.5	-13.9	-2543	Feni Drift	-368	1998	d18O	permil	carbonate	planktonic foraminifera	G. bulloides; 250-315	surface seawater	Urey, H. C. 1948. Oxygen isotopes in nature and in the laboratory. Science, 108:489?496.	negative	T_water	annual	TRUE	http://lipdverse.org/iso2k/1_0_0/MS09TRFD.html	LJ 20/02/2019
MS10BLMS01b	MS10BLMS	MS10BLMS01b	MarineSediment	10.1038/ngeo920	Linsley, B. K., Rosenthal, Y. and Oppo, D. W.: Holocene evolution of the Indonesian throughflow and the western Pacific warm pool, Nature Geoscience, 3(8), 578–583, doi:10.1038/ngeo920, 2010.	10.1038/ngeo2510	McGregor, H. V., Evans, M. N., Goosse, H., Leduc, G., Martrat, B., Addison, J. A., Mortyn, P. G., Oppo, D. W., Seidenkrantz, M.-S., Sicre, M.-A., Phipps, S. J., Selvaraj, K., Thirumalai, K., Filipsson, H. L. and Ersek, V.: Robust global ocean cooling trend for the pre-industrial Common Era, Nature Geoscience, 8(9), 671–677, doi:10.1038/ngeo2510, 2015.	https://www.ncdc.noaa.gov/paleo/study/10420	-7.4	115.2	-594	Makassar Strait, core 13GGC	-8607	1821	d18O	permil	inferred seawater		inferred from G. ruber ss (white) d18O and Mg/Ca	surface seawater		positive	d18O_seawater	annual	TRUE	http://lipdverse.org/iso2k/1_0_0/MS10BLMS.html	LJ 12/12/2018
MS10BLMS01a	MS10BLMS	MS10BLMS01a	MarineSediment	10.1038/ngeo920	Linsley, B. K., Rosenthal, Y. and Oppo, D. W.: Holocene evolution of the Indonesian throughflow and the western Pacific warm pool, Nature Geoscience, 3(8), 578–583, doi:10.1038/ngeo920, 2010.	10.1038/ngeo2510	McGregor, H. V., Evans, M. N., Goosse, H., Leduc, G., Martrat, B., Addison, J. A., Mortyn, P. G., Oppo, D. W., Seidenkrantz, M.-S., Sicre, M.-A., Phipps, S. J., Selvaraj, K., Thirumalai, K., Filipsson, H. L. and Ersek, V.: Robust global ocean cooling trend for the pre-industrial Common Era, Nature Geoscience, 8(9), 671–677, doi:10.1038/ngeo2510, 2015.	https://www.ncdc.noaa.gov/paleo/study/10420	-7.4	115.2	-594	Makassar Strait, core 13GGC	-8607	1821	d18O	permil	carbonate	planktonic foraminifera	G. ruber ss (white) 212-250	surface seawater	Urey, H. C. 1948. Oxygen isotopes in nature and in the laboratory. Science, 108:489?496.	negative	T_water	annual	TRUE	http://lipdverse.org/iso2k/1_0_0/MS10BLMS.html	LJ 20/02/2019
MS10JTMA001	MS10JTMA	MS10JTMA001	MarineSediment	10.1029/2009PA001871	Tierney, J. E., Oppo, D. W., Rosenthal, Y., Russell, J. M. and Linsley, B. K.: Coordinated hydrological regimes in the Indo-Pacific region during the past two millennia, Paleoceanography, 25(1), doi:10.1029/2009pa001871, 2010.			https://www.ncdc.noaa.gov/paleo/study/10438	-3.8833	119.45	-459	Makassar Strait	-331	1998	d2H	permil	terrestrial biomarker	n-alkanoic acid	C30	precipitation		negative	P_isotope		TRUE	http://lipdverse.org/iso2k/1_0_0/MS10JTMA.html	GL and LJ
MS11ANMN01b	MS11ANMN	MS11ANMN01b	MarineSediment	10.1130/G31421.1	Newton, A., Thunell, R. and Stott, L.: Changes in the Indonesian Throughflow during the past 2000 yr, Geology, 39(1), 63–66, doi:10.1130/g31421.1, 2010.	10.1038/ngeo2510	McGregor, H. V., Evans, M. N., Goosse, H., Leduc, G., Martrat, B., Addison, J. A., Mortyn, P. G., Oppo, D. W., Seidenkrantz, M.-S., Sicre, M.-A., Phipps, S. J., Selvaraj, K., Thirumalai, K., Filipsson, H. L. and Ersek, V.: Robust global ocean cooling trend for the pre-industrial Common Era, Nature Geoscience, 8(9), 671–677, doi:10.1038/ngeo2510, 2015.	https://www.ncdc.noaa.gov/paleo/study/12906	1.4	119.08	968	Makassar straits north	1.66665	1890	d18O	permil	inferred seawater		inferred from G. ruber (white) d18O and Mg/Ca	surface seawater		positive	d18O_seawater	annual	TRUE	http://lipdverse.org/iso2k/1_0_0/MS11ANMN.html	LJ 12/12/2018
MS11ANMN01a	MS11ANMN	MS11ANMN01a	MarineSediment	10.1130/G31421.1	Newton, A., Thunell, R. and Stott, L.: Changes in the Indonesian Throughflow during the past 2000 yr, Geology, 39(1), 63–66, doi:10.1130/g31421.1, 2010.	10.1038/ngeo2510	McGregor, H. V., Evans, M. N., Goosse, H., Leduc, G., Martrat, B., Addison, J. A., Mortyn, P. G., Oppo, D. W., Seidenkrantz, M.-S., Sicre, M.-A., Phipps, S. J., Selvaraj, K., Thirumalai, K., Filipsson, H. L. and Ersek, V.: Robust global ocean cooling trend for the pre-industrial Common Era, Nature Geoscience, 8(9), 671–677, doi:10.1038/ngeo2510, 2015.	https://www.ncdc.noaa.gov/paleo/study/12906	1.4	119.08	968	Makassar straits north	1.66665	1890	d18O	permil	carbonate	planktonic foraminifera	G. ruber (white) 250350	surface seawater	Urey, H. C. 1948. Oxygen isotopes in nature and in the laboratory. Science, 108:489?496.	negative	T_water		TRUE	http://lipdverse.org/iso2k/1_0_0/MS11ANMN.html	LJ 20/02/2019
MS11ANMS01b	MS11ANMS	MS11ANMS01b	MarineSediment	10.1130/G31421.1	Newton, A., Thunell, R. and Stott, L.: Changes in the Indonesian Throughflow during the past 2000 yr, Geology, 39(1), 63–66, doi:10.1130/g31421.1, 2010.			https://www.ncdc.noaa.gov/paleo/study/12906	-5.2	117.48	-1185	Makassar straits south	-55	1905	d18O	permil	inferred seawater		inferred from G. ruber (white) d18O and Mg/Ca	surface seawater		positive	d18O_seawater	annual	TRUE	http://lipdverse.org/iso2k/1_0_0/MS11ANMS.html	LJ 12/12/2018
MS11ANMS01a	MS11ANMS	MS11ANMS01a	MarineSediment	10.1130/G31421.1	Newton, A., Thunell, R. and Stott, L.: Changes in the Indonesian Throughflow during the past 2000 yr, Geology, 39(1), 63–66, doi:10.1130/g31421.1, 2010.			https://www.ncdc.noaa.gov/paleo/study/12906	-5.2	117.48	-1185	Makassar straits south	-55	1905	d18O	permil	carbonate	planktonic foraminifera	G. ruber (white) 250-350	surface seawater	Urey, H. C. 1948. Oxygen isotopes in nature and in the laboratory. Science, 108:489?496.	negative	T_water	annual	TRUE	http://lipdverse.org/iso2k/1_0_0/MS11ANMS.html	LJ 20/02/2019
MS11CSCN01b	MS11CSCN	MS11CSCN01b	MarineSediment	10.1029/2010PA002038	Saenger, C., Came, R. E., Oppo, D. W., Keigwin, L. D. and Cohen, A. L.: Regional climate variability in the western subtropical North Atlantic during the past two millennia, Paleoceanography, 26(2), n/a–n/a, doi:10.1029/2010pa002038, 2011.	10.1038/ngeo2510	McGregor, H. V., Evans, M. N., Goosse, H., Leduc, G., Martrat, B., Addison, J. A., Mortyn, P. G., Oppo, D. W., Seidenkrantz, M.-S., Sicre, M.-A., Phipps, S. J., Selvaraj, K., Thirumalai, K., Filipsson, H. L. and Ersek, V.: Robust global ocean cooling trend for the pre-industrial Common Era, Nature Geoscience, 8(9), 671–677, doi:10.1038/ngeo2510, 2015.	https://www.ncdc.noaa.gov/paleo/study/11816	32.98	-76.32	-1205	Carolina Slope North	358	1950	d18O	permil	inferred seawater		inferred from G. ruber ss (white) d18O and Mg/Ca	surface seawater		positive	d18O_seawater	annual	TRUE	http://lipdverse.org/iso2kv0_10_0/MS11CSCN.html	LJ 12/12/2018
MS11CSCN01a	MS11CSCN	MS11CSCN01a	MarineSediment	10.1029/2010PA002038	Saenger, C., Came, R. E., Oppo, D. W., Keigwin, L. D. and Cohen, A. L.: Regional climate variability in the western subtropical North Atlantic during the past two millennia, Paleoceanography, 26(2), n/a–n/a, doi:10.1029/2010pa002038, 2011.	10.1038/ngeo2510	McGregor, H. V., Evans, M. N., Goosse, H., Leduc, G., Martrat, B., Addison, J. A., Mortyn, P. G., Oppo, D. W., Seidenkrantz, M.-S., Sicre, M.-A., Phipps, S. J., Selvaraj, K., Thirumalai, K., Filipsson, H. L. and Ersek, V.: Robust global ocean cooling trend for the pre-industrial Common Era, Nature Geoscience, 8(9), 671–677, doi:10.1038/ngeo2510, 2015.	https://www.ncdc.noaa.gov/paleo/study/11816	32.98	-76.32	-1205	Carolina Slope North	358	1950	d18O	permil	carbonate	planktonic foraminifera	G. ruber (white) ss; 212-250	surface seawater	Urey, H. C. 1948. Oxygen isotopes in nature and in the laboratory. Science, 108:489?496.	negative	T_water	annual	TRUE	http://lipdverse.org/iso2kv0_10_0/MS11CSCN.html	LJ 20/02/2019
MS11CSCS01b	MS11CSCS	MS11CSCS01b	MarineSediment	10.1029/2010PA002038	Saenger, C., Came, R. E., Oppo, D. W., Keigwin, L. D. and Cohen, A. L.: Regional climate variability in the western subtropical North Atlantic during the past two millennia, Paleoceanography, 26(2), n/a–n/a, doi:10.1029/2010pa002038, 2011.	10.1038/ngeo2510	McGregor, H. V., Evans, M. N., Goosse, H., Leduc, G., Martrat, B., Addison, J. A., Mortyn, P. G., Oppo, D. W., Seidenkrantz, M.-S., Sicre, M.-A., Phipps, S. J., Selvaraj, K., Thirumalai, K., Filipsson, H. L. and Ersek, V.: Robust global ocean cooling trend for the pre-industrial Common Era, Nature Geoscience, 8(9), 671–677, doi:10.1038/ngeo2510, 2015.	https://www.ncdc.noaa.gov/paleo/study/11816	32.78	-76.28	-1895	Carolina Slope South	57	1953	d18O	permil	inferred seawater		inferred from G. ruber ss (white) d18O and Mg/Ca	surface seawater		positive	d18O_seawater	annual	TRUE	http://lipdverse.org/iso2kv0_10_0/MS11CSCS.html	LJ 12/12/2018
MS11CSCS01a	MS11CSCS	MS11CSCS01a	MarineSediment	10.1029/2010PA002038	Saenger, C., Came, R. E., Oppo, D. W., Keigwin, L. D. and Cohen, A. L.: Regional climate variability in the western subtropical North Atlantic during the past two millennia, Paleoceanography, 26(2), n/a–n/a, doi:10.1029/2010pa002038, 2011.	10.1038/ngeo2510	McGregor, H. V., Evans, M. N., Goosse, H., Leduc, G., Martrat, B., Addison, J. A., Mortyn, P. G., Oppo, D. W., Seidenkrantz, M.-S., Sicre, M.-A., Phipps, S. J., Selvaraj, K., Thirumalai, K., Filipsson, H. L. and Ersek, V.: Robust global ocean cooling trend for the pre-industrial Common Era, Nature Geoscience, 8(9), 671–677, doi:10.1038/ngeo2510, 2015.	https://www.ncdc.noaa.gov/paleo/study/11816	32.78	-76.28	-1895	Carolina Slope South	57	1953	d18O	permil	carbonate	planktonic foraminifera	G. ruber (white) ss; 212-250	surface seawater	Urey, H. C. 1948. Oxygen isotopes in nature and in the laboratory. Science, 108:489?496.	negative	T_water	annual	TRUE	http://lipdverse.org/iso2kv0_10_0/MS11CSCS.html	LJ 20/02/2019
MS11FAPM04	MS11FAPM	MS11FAPM04	MarineSediment	10.3354/cr01010	Abrantes, F., Rodrigues, T., Montanari, B., Santos, C., Witt, L., Lopes, C. and Voelker, A.: Climate of the last millennium at the southern pole of the North Atlantic Oscillation: an inner-shelf sediment record of flooding and upwelling, Climate Research, 48(2), 261–280, doi:10.3354/cr01010, 2011.			https://doi.pangaea.de/10.1594/PANGAEA.784855	41.335	-8.9883	-84	Portuguese Margin	1083	2000	d18O	permil	carbonate	planktonic foraminifera	N. pachyderma	surface seawater	Urey, H. C. 1948. Oxygen isotopes in nature and in the laboratory. Science, 108:489?496.	negative	T_water	annual	TRUE	http://lipdverse.org/iso2k/1_0_0/MS11FAPM.html	LJ 12/12/2018
MS11FAPM02	MS11FAPM	MS11FAPM02	MarineSediment	10.3354/cr01010	Abrantes, F., Rodrigues, T., Montanari, B., Santos, C., Witt, L., Lopes, C. and Voelker, A.: Climate of the last millennium at the southern pole of the North Atlantic Oscillation: an inner-shelf sediment record of flooding and upwelling, Climate Research, 48(2), 261–280, doi:10.3354/cr01010, 2011.			https://doi.pangaea.de/10.1594/PANGAEA.784855	41.335	-8.9883	-84	Portuguese Margin	1083	2000	d18O	permil	carbonate	planktonic foraminifera	G. inflata	subsurface seawater	Urey, H. C. 1948. Oxygen isotopes in nature and in the laboratory. Science, 108:489?496.	negative	T_water	DJF	TRUE	http://lipdverse.org/iso2k/1_0_0/MS11FAPM.html	LJ 12/12/2018
MS11FAPM03	MS11FAPM	MS11FAPM03	MarineSediment	10.3354/cr01010	Abrantes, F., Rodrigues, T., Montanari, B., Santos, C., Witt, L., Lopes, C. and Voelker, A.: Climate of the last millennium at the southern pole of the North Atlantic Oscillation: an inner-shelf sediment record of flooding and upwelling, Climate Research, 48(2), 261–280, doi:10.3354/cr01010, 2011.			https://doi.pangaea.de/10.1594/PANGAEA.784855	41.335	-8.9883	-84	Portuguese Margin	1083	2000	d18O	permil	carbonate	planktonic foraminifera	N. incompta	subsurface seawater	Urey, H. C. 1948. Oxygen isotopes in nature and in the laboratory. Science, 108:489?496.	negative	T_water	DJF	TRUE	http://lipdverse.org/iso2k/1_0_0/MS11FAPM.html	LJ 12/12/2018
MS11FAPM01	MS11FAPM	MS11FAPM01	MarineSediment	10.3354/cr01010	Abrantes, F., Rodrigues, T., Montanari, B., Santos, C., Witt, L., Lopes, C. and Voelker, A.: Climate of the last millennium at the southern pole of the North Atlantic Oscillation: an inner-shelf sediment record of flooding and upwelling, Climate Research, 48(2), 261–280, doi:10.3354/cr01010, 2011.			https://doi.pangaea.de/10.1594/PANGAEA.784855	41.335	-8.9883	-84	Portuguese Margin	1083	2000	d18O	permil	carbonate	planktonic foraminifera	G. bulloides	surface seawater	Urey, H. C. 1948. Oxygen isotopes in nature and in the laboratory. Science, 108:489?496.	negative	T_water	JJA	TRUE	http://lipdverse.org/iso2k/1_0_0/MS11FAPM.html	LJ 20/02/2019
MS11KDMS01	MS11KDMS	MS11KDMS01	MarineSediment	10.1029/2011PA002139	Khider, D., Stott, L. D., Emile-Geay, J., Thunell, R. and Hammond, D. E.: Assessing El Nino Southern Oscillation variability during the past millennium, Paleoceanography, 26(3), n/a–n/a, doi:10.1029/2011pa002139, 2011.			https://www.ncdc.noaa.gov/paleo/study/18315	1.4033	119.078	-968	Makassar strait	719	1847	d18O	permil	carbonate	planktonic foraminifera	P. obliquiloculata (>250)	subsurface seawater	Urey, H. C. 1948. Oxygen isotopes in nature and in the laboratory. Science, 108:489?496.	negative	T_water	annual	TRUE	http://lipdverse.org/iso2kv0_10_0/MS11KDMS.html	LJ 12/12/2018
MS11KWFS01	MS11KWFS	MS11KWFS01	MarineSediment	10.1016/j.palaeo.2011.05.030	Werner, K., Spielhagen, R. F., Bauch, D., Hass, H. C., Kandiano, E. and Zamelczyk, K.: Atlantic Water advection to the eastern Fram Strait — Multiproxy evidence for late Holocene variability, Palaeogeography, Palaeoclimatology, Palaeoecology, 308(3-4), 264–276, doi:10.1016/j.palaeo.2011.05.030, 2011.			https://doi.pangaea.de/10.1594/PANGAEA.761540	78.9157	6.7672	-1490.5	eastern Fram Strait	-120	2007	d18O	permil	carbonate	planktonic foraminifera	N. pachyderma	subsurface seawater	Urey, H. C. 1948. Oxygen isotopes in nature and in the laboratory. Science, 108:489?496.	negative	T_water	annual	TRUE	http://lipdverse.org/iso2k/1_0_0/MS11KWFS.html	LJ 12/12/2018
MS11SENS01	MS11SENS	MS11SENS01	MarineSediment	10.1016/j.quascirev.2011.07.025	Sejrup, H. P., Haflidason, H. and Andrews, J. T.: A Holocene North Atlantic SST record and regional climate variability, Quaternary Science Reviews, 30(21-22), 3181–3195, doi:10.1016/j.quascirev.2011.07.025, 2011.			https://www.ncdc.noaa.gov/paleo/study/22592	63.76	5.25	-875	Norwegian Sea	-5930.8	1998.2	d18O	permil	carbonate	planktonic foraminifera	N. incompta (125-1000)	subsurface seawater	Urey, H. C. 1948. Oxygen isotopes in nature and in the laboratory. Science, 108:489?496.	negative	T_water	annual	TRUE	http://lipdverse.org/iso2k/1_0_0/MS11SENS.html	LJ 12/12/2018
MS12AMMM01b	MS12AMMM	MS12AMMM01b	MarineSediment	10.1016/j.quascirev.2012.04.007	Moreno, A., Perez, A., Frigola, J., Nieto-Moreno, V., Rodrigo-Gamiz, M., Martrat, B., Gonzalez-Samperiz, P., Morellon, M., Martin-Puertas, C., Corella, J. P., Belmonte, A., Sancho, C., Cacho, I., Herrera, G., Canals, M., Grimalt, J. O., Jimenez-Espejo, F., Martinez-Ruiz, F., Vegas-Vilarrubia, T. and Valero-Garces, B. L.: The Medieval Climate Anomaly in the Iberian Peninsula reconstructed from mar…	10.1038/ngeo2510	McGregor, H. V., Evans, M. N., Goosse, H., Leduc, G., Martrat, B., Addison, J. A., Mortyn, P. G., Oppo, D. W., Seidenkrantz, M.-S., Sicre, M.-A., Phipps, S. J., Selvaraj, K., Thirumalai, K., Filipsson, H. L. and Ersek, V.: Robust global ocean cooling trend for the pre-industrial Common Era, Nature Geoscience, 8(9), 671–677, doi:10.1038/ngeo2510, 2015.	http://doi.pangaea.de/10.1594/PANGAEA.780423	40.5	4.03	-2391	Mediterranean (Minorca)	-61.14	1987.86	d18O	permil	inferred seawater		inferred from G. bulloides d18O and Mg/Ca	surface seawater		positive	d18O_seawater	annual	TRUE	http://lipdverse.org/iso2k/1_0_0/MS12AMMM.html	LJ 12/12/2018
MS12AMMM01a	MS12AMMM	MS12AMMM01a	MarineSediment	10.1016/j.quascirev.2012.04.007	Moreno, A., Perez, A., Frigola, J., Nieto-Moreno, V., Rodrigo-Gamiz, M., Martrat, B., Gonzalez-Samperiz, P., Morellon, M., Martin-Puertas, C., Corella, J. P., Belmonte, A., Sancho, C., Cacho, I., Herrera, G., Canals, M., Grimalt, J. O., Jimenez-Espejo, F., Martinez-Ruiz, F., Vegas-Vilarrubia, T. and Valero-Garces, B. L.: The Medieval Climate Anomaly in the Iberian Peninsula reconstructed from mar…	10.1038/ngeo2510	McGregor, H. V., Evans, M. N., Goosse, H., Leduc, G., Martrat, B., Addison, J. A., Mortyn, P. G., Oppo, D. W., Seidenkrantz, M.-S., Sicre, M.-A., Phipps, S. J., Selvaraj, K., Thirumalai, K., Filipsson, H. L. and Ersek, V.: Robust global ocean cooling trend for the pre-industrial Common Era, Nature Geoscience, 8(9), 671–677, doi:10.1038/ngeo2510, 2015.	http://doi.pangaea.de/10.1594/PANGAEA.780423	40.5	4.03	-2391	Mediterranean (Minorca)	-61.14	1987.86	d18O	permil	carbonate	planktonic foraminifera	G. bulloides	surface seawater	Urey, H. C. 1948. Oxygen isotopes in nature and in the laboratory. Science, 108:489?496.	negative	T_water	annual	TRUE	http://lipdverse.org/iso2k/1_0_0/MS12AMMM.html	LJ 20/02/2019
MS12AMMM02b	MS12AMMM	MS12AMMM02b	MarineSediment	10.1016/j.quascirev.2012.04.007	Moreno, A., Perez, A., Frigola, J., Nieto-Moreno, V., Rodrigo-Gamiz, M., Martrat, B., Gonzalez-Samperiz, P., Morellon, M., Martin-Puertas, C., Corella, J. P., Belmonte, A., Sancho, C., Cacho, I., Herrera, G., Canals, M., Grimalt, J. O., Jimenez-Espejo, F., Martinez-Ruiz, F., Vegas-Vilarrubia, T. and Valero-Garces, B. L.: The Medieval Climate Anomaly in the Iberian Peninsula reconstructed from mar…	10.1038/ngeo2510	McGregor, H. V., Evans, M. N., Goosse, H., Leduc, G., Martrat, B., Addison, J. A., Mortyn, P. G., Oppo, D. W., Seidenkrantz, M.-S., Sicre, M.-A., Phipps, S. J., Selvaraj, K., Thirumalai, K., Filipsson, H. L. and Ersek, V.: Robust global ocean cooling trend for the pre-industrial Common Era, Nature Geoscience, 8(9), 671–677, doi:10.1038/ngeo2510, 2015.	http://doi.pangaea.de/10.1594/PANGAEA.780423	40.5	4.03	-2391	Mediterranean (Minorca)	316.67	1971.76	d18O	permil	inferred seawater		inferred from G. bulloides d18O and Mg/Ca	surface seawater		positive	d18O_seawater	annual	TRUE	http://lipdverse.org/iso2k/1_0_0/MS12AMMM.html	LJ 12/12/2018
MS12AMMM02a	MS12AMMM	MS12AMMM02a	MarineSediment	10.1016/j.quascirev.2012.04.007	Moreno, A., Perez, A., Frigola, J., Nieto-Moreno, V., Rodrigo-Gamiz, M., Martrat, B., Gonzalez-Samperiz, P., Morellon, M., Martin-Puertas, C., Corella, J. P., Belmonte, A., Sancho, C., Cacho, I., Herrera, G., Canals, M., Grimalt, J. O., Jimenez-Espejo, F., Martinez-Ruiz, F., Vegas-Vilarrubia, T. and Valero-Garces, B. L.: The Medieval Climate Anomaly in the Iberian Peninsula reconstructed from mar…	10.1038/ngeo2510	McGregor, H. V., Evans, M. N., Goosse, H., Leduc, G., Martrat, B., Addison, J. A., Mortyn, P. G., Oppo, D. W., Seidenkrantz, M.-S., Sicre, M.-A., Phipps, S. J., Selvaraj, K., Thirumalai, K., Filipsson, H. L. and Ersek, V.: Robust global ocean cooling trend for the pre-industrial Common Era, Nature Geoscience, 8(9), 671–677, doi:10.1038/ngeo2510, 2015.	http://doi.pangaea.de/10.1594/PANGAEA.780423	40.5	4.03	-2391	Mediterranean (Minorca)	316.67	1971.76	d18O	permil	carbonate	planktonic foraminifera	G. bulloides	surface seawater	Urey, H. C. 1948. Oxygen isotopes in nature and in the laboratory. Science, 108:489?496.	negative	T_water	annual	TRUE	http://lipdverse.org/iso2k/1_0_0/MS12AMMM.html	LJ 20/02/2019
MS12CCCH01b	MS12CCCH	MS12CCCH01b	MarineSediment	10.1029/2011PA002184	Cleroux, C., Debret, M., Cortijo, E., Duplessy, J.-C., Dewilde, F., Reijmer, J. and Massei, N.: High-resolution sea surface reconstructions off Cape Hatteras over the last 10 ka, Paleoceanography, 27(1), n/a–n/a, doi:10.1029/2011pa002184, 2012.			http://doi.pangaea.de/10.1594/PANGAEA.776444	34.973	-75.201	-620	Cape Hatteras	-75.44	1294.17	d18O	permil	inferred seawater		inferred from G. ruber ss (white) d18O and Mg/Ca	surface seawater		positive	d18O_seawater	annual	TRUE	http://lipdverse.org/iso2k/1_0_0/MS12CCCH.html	LJ 12/12/2018
MS12CCCH01a	MS12CCCH	MS12CCCH01a	MarineSediment	10.1029/2011PA002184	Cleroux, C., Debret, M., Cortijo, E., Duplessy, J.-C., Dewilde, F., Reijmer, J. and Massei, N.: High-resolution sea surface reconstructions off Cape Hatteras over the last 10 ka, Paleoceanography, 27(1), n/a–n/a, doi:10.1029/2011pa002184, 2012.			http://doi.pangaea.de/10.1594/PANGAEA.776444	34.973	-75.201	-620	Cape Hatteras	-75.44	1294.17	d18O	permil	carbonate	planktonic foraminifera	G. ruber s.s. (white); 250-315	surface seawater	Urey, H. C. 1948. Oxygen isotopes in nature and in the laboratory. Science, 108:489?496.	negative	T_water	not applicable (always)	TRUE	http://lipdverse.org/iso2k/1_0_0/MS12CCCH.html	LJ 20/02/2019
MS13KWFS02	MS13KWFS	MS13KWFS02	MarineSediment	10.1016/j.quascirev.2012.04.024	Mueller, J., Werner, K., Stein, R., Fahl, K., Moros, M. and Jansen, E.: Holocene cooling culminates in sea ice oscillations in Fram Strait, Quaternary Science Reviews, 47, 1–14, doi:10.1016/j.quascirev.2012.04.024, 2012.			https://doi.pangaea.de/10.1594/PANGAEA.779628	78.9157	6.7672	-1389	eastern Fram Strait	-6888	1529	d18O	permil	carbonate	planktonic foraminifera	T. quinqueloba	surface seawater	Urey, H. C. 1948. Oxygen isotopes in nature and in the laboratory. Science, 108:489?496.	negative	T_water	not applicable (always)	TRUE	http://lipdverse.org/iso2k/1_0_0/MS13KWFS.html	LJ 12/12/2018
MS13KWFS01	MS13KWFS	MS13KWFS01	MarineSediment	10.1016/j.quascirev.2012.04.024	Mueller, J., Werner, K., Stein, R., Fahl, K., Moros, M. and Jansen, E.: Holocene cooling culminates in sea ice oscillations in Fram Strait, Quaternary Science Reviews, 47, 1–14, doi:10.1016/j.quascirev.2012.04.024, 2012.			https://doi.pangaea.de/10.1594/PANGAEA.779628	78.9157	6.7672	-1389	eastern Fram Strait	-6888	1529	d18O	permil	carbonate	planktonic foraminifera	N. pachyderma	subsurface seawater	Urey, H. C. 1948. Oxygen isotopes in nature and in the laboratory. Science, 108:489?496.	negative	T_water	not applicable (always)	TRUE	http://lipdverse.org/iso2k/1_0_0/MS13KWFS.html	LJ 20/02/2019
MS13RSAS01b	MS13RSAS	MS13RSAS01b	MarineSediment	10.1016/j.epsl.2013.05.022	Saraswat, R., Lea, D. W., Nigam, R., Mackensen, A. and Naik, D. K.: Deglaciation in the tropical Indian Ocean driven by interplay between the regional monsoon and global teleconnections, Earth and Planetary Science Letters, 375, 166–175, doi:10.1016/j.epsl.2013.05.022, 2013.	10.1038/ngeo2510	McGregor, H. V., Evans, M. N., Goosse, H., Leduc, G., Martrat, B., Addison, J. A., Mortyn, P. G., Oppo, D. W., Seidenkrantz, M.-S., Sicre, M.-A., Phipps, S. J., Selvaraj, K., Thirumalai, K., Filipsson, H. L. and Ersek, V.: Robust global ocean cooling trend for the pre-industrial Common Era, Nature Geoscience, 8(9), 671–677, doi:10.1038/ngeo2510, 2015.	https://www.ncdc.noaa.gov/paleo/study/17575	10.98	74.9993	-1245	SW coast of India, Indian ocean	-29650	1830	d18O	permil	inferred seawater		inferred from G. ruber (white) d18O and Mg/Ca	surface seawater		positive	d18O_seawater	not applicable (always)	TRUE	http://lipdverse.org/iso2k/1_0_0/MS13RSAS.html	LJ 12/12/2018
MS13RSAS01a	MS13RSAS	MS13RSAS01a	MarineSediment	10.1016/j.epsl.2013.05.022	Saraswat, R., Lea, D. W., Nigam, R., Mackensen, A. and Naik, D. K.: Deglaciation in the tropical Indian Ocean driven by interplay between the regional monsoon and global teleconnections, Earth and Planetary Science Letters, 375, 166–175, doi:10.1016/j.epsl.2013.05.022, 2013.	10.1038/ngeo2510	McGregor, H. V., Evans, M. N., Goosse, H., Leduc, G., Martrat, B., Addison, J. A., Mortyn, P. G., Oppo, D. W., Seidenkrantz, M.-S., Sicre, M.-A., Phipps, S. J., Selvaraj, K., Thirumalai, K., Filipsson, H. L. and Ersek, V.: Robust global ocean cooling trend for the pre-industrial Common Era, Nature Geoscience, 8(9), 671–677, doi:10.1038/ngeo2510, 2015.	https://www.ncdc.noaa.gov/paleo/study/17575	10.98	74.9993	-1245	SW coast of India, Indian ocean	-29650	1830	d18O	permil	carbonate	planktonic foraminifera	G ruber (white) 250-355	surface seawater	Urey, H. C. 1948. Oxygen isotopes in nature and in the laboratory. Science, 108:489?496.	negative	T_water	not applicable (always)	TRUE	http://lipdverse.org/iso2k/1_0_0/MS13RSAS.html	LJ 20/02/2019
MS14GFSS01b	MS14GFSS	MS14GFSS01b	MarineSediment	10.1016/j.epsl.2013.11.032	Gibbons, F. T., Oppo, D. W., Mohtadi, M., Rosenthal, Y., Cheng, J., Liu, Z. and Linsley, B. K.: Deglacial δ18O and hydrologic variability in the tropical Pacific and Indian Oceans, Earth and Planetary Science Letters, 387, 240–251, doi:10.1016/j.epsl.2013.11.032, 2014.			https://www.ncdc.noaa.gov/paleo/study/16155	-9.5948	120.917	-1250	Savu Sea	-33289.6	1479.9	d18O	permil	inferred seawater		inferred from G. ruber (white) d18O and Mg/Ca	surface seawater		positive	d18O_seawater	not applicable (always)	TRUE	http://lipdverse.org/iso2k/1_0_0/MS14GFSS.html	LJ 12/12/2018
MS14GFSS01a	MS14GFSS	MS14GFSS01a	MarineSediment	10.1016/j.epsl.2013.11.032	Gibbons, F. T., Oppo, D. W., Mohtadi, M., Rosenthal, Y., Cheng, J., Liu, Z. and Linsley, B. K.: Deglacial δ18O and hydrologic variability in the tropical Pacific and Indian Oceans, Earth and Planetary Science Letters, 387, 240–251, doi:10.1016/j.epsl.2013.11.032, 2014.			https://www.ncdc.noaa.gov/paleo/study/16155	-9.5948	120.917	-1250	Savu Sea	-33289.6	1479.9	d18O	permil	carbonate	planktonic foraminifera	G. ruber white (size not provided)	surface seawater	Urey, H. C. 1948. Oxygen isotopes in nature and in the laboratory. Science, 108:489?496.	negative	T_water	not applicable (always)	TRUE	http://lipdverse.org/iso2k/1_0_0/MS14GFSS.html	LJ 20/02/2019
MS14MOLS03	MS14MOLS	MS14MOLS03	MarineSediment	10.1002/2013PA002523	Moffa-Sanchez, P., Hall, I. R., Barker, S., Thornalley, D. J. R. and Yashayaev, I.: Surface changes in the eastern Labrador Sea around the onset of the Little Ice Age, Paleoceanography, 29(3), 160–175, doi:10.1002/2013pa002523, 2014.	10.1038/NGEO2094	Moffa-Sanchez, P., Born, A., Hall, I. R., Thornalley, D. J. R. and Barker, S.: Solar forcing of North Atlantic surface temperature and salinity over the past millennium, Nature Geoscience, 7(4), 275–278, doi:10.1038/ngeo2094, 2014.	https://www.ncdc.noaa.gov/paleo/study/19802	57.5042	-48.7223	3486	RApiD-35-25B Labrador Sea	763.36	1914.65	d18O	permil	carbonate	planktonic foraminifera	T. quinqueloba (150-212)	surface seawater	Urey, H. C. 1948. Oxygen isotopes in nature and in the laboratory. Science, 108:489?496.	negative	T_water	not applicable (always)	TRUE	http://lipdverse.org/iso2k/1_0_0/MS14MOLS.html	LJ 12/12/2018
MS14MOLS01b	MS14MOLS	MS14MOLS01b	MarineSediment	10.1002/2013PA002523	Moffa-Sanchez, P., Hall, I. R., Barker, S., Thornalley, D. J. R. and Yashayaev, I.: Surface changes in the eastern Labrador Sea around the onset of the Little Ice Age, Paleoceanography, 29(3), 160–175, doi:10.1002/2013pa002523, 2014.	10.1038/NGEO2094	Moffa-Sanchez, P., Born, A., Hall, I. R., Thornalley, D. J. R. and Barker, S.: Solar forcing of North Atlantic surface temperature and salinity over the past millennium, Nature Geoscience, 7(4), 275–278, doi:10.1038/ngeo2094, 2014.	https://www.ncdc.noaa.gov/paleo/study/19802	57.5042	-48.7223	3486	RApiD-35-25B Labrador Sea	763.36	1914.65	d18O	permil	inferred seawater		inferred from G. bulloides d18O and Mg/Ca	surface seawater		positive	d18O_seawater	not applicable (always)	TRUE	http://lipdverse.org/iso2k/1_0_0/MS14MOLS.html	LJ 12/12/2018
MS14MOLS02a	MS14MOLS	MS14MOLS02a	MarineSediment	10.1002/2013PA002523	Moffa-Sanchez, P., Hall, I. R., Barker, S., Thornalley, D. J. R. and Yashayaev, I.: Surface changes in the eastern Labrador Sea around the onset of the Little Ice Age, Paleoceanography, 29(3), 160–175, doi:10.1002/2013pa002523, 2014.	10.1038/NGEO2094	Moffa-Sanchez, P., Born, A., Hall, I. R., Thornalley, D. J. R. and Barker, S.: Solar forcing of North Atlantic surface temperature and salinity over the past millennium, Nature Geoscience, 7(4), 275–278, doi:10.1038/ngeo2094, 2014.	https://www.ncdc.noaa.gov/paleo/study/19802	57.5042	-48.7223	3486	RApiD-35-25B Labrador Sea	763.36	1914.65	d18O	permil	carbonate	planktonic foraminifera	N. pachyderma (150-212)	subsurface seawater	Urey, H. C. 1948. Oxygen isotopes in nature and in the laboratory. Science, 108:489?496.	negative	T_water	not applicable (always)	TRUE	http://lipdverse.org/iso2k/1_0_0/MS14MOLS.html	LJ 12/12/2018
MS14MOLS02b	MS14MOLS	MS14MOLS02b	MarineSediment	10.1002/2013PA002523	Moffa-Sanchez, P., Hall, I. R., Barker, S., Thornalley, D. J. R. and Yashayaev, I.: Surface changes in the eastern Labrador Sea around the onset of the Little Ice Age, Paleoceanography, 29(3), 160–175, doi:10.1002/2013pa002523, 2014.	10.1038/NGEO2094	Moffa-Sanchez, P., Born, A., Hall, I. R., Thornalley, D. J. R. and Barker, S.: Solar forcing of North Atlantic surface temperature and salinity over the past millennium, Nature Geoscience, 7(4), 275–278, doi:10.1038/ngeo2094, 2014.	https://www.ncdc.noaa.gov/paleo/study/19802	57.5042	-48.7223	3486	RApiD-35-25B Labrador Sea	763.36	1914.65	d18O	permil	inferred seawater		inferred from N. pachyderma d18O and Mg/Ca	subsurface seawater		positive	d18O_seawater	not applicable (always)	TRUE	http://lipdverse.org/iso2k/1_0_0/MS14MOLS.html	LJ 12/12/2018
MS14MOLS01a	MS14MOLS	MS14MOLS01a	MarineSediment	10.1002/2013PA002523	Moffa-Sanchez, P., Hall, I. R., Barker, S., Thornalley, D. J. R. and Yashayaev, I.: Surface changes in the eastern Labrador Sea around the onset of the Little Ice Age, Paleoceanography, 29(3), 160–175, doi:10.1002/2013pa002523, 2014.	10.1038/NGEO2094	Moffa-Sanchez, P., Born, A., Hall, I. R., Thornalley, D. J. R. and Barker, S.: Solar forcing of North Atlantic surface temperature and salinity over the past millennium, Nature Geoscience, 7(4), 275–278, doi:10.1038/ngeo2094, 2014.	https://www.ncdc.noaa.gov/paleo/study/19802	57.5042	-48.7223	3486	RApiD-35-25B Labrador Sea	763.36	1914.65	d18O	permil	carbonate	planktonic foraminifera	G. bulloides	surface seawater	Urey, H. C. 1948. Oxygen isotopes in nature and in the laboratory. Science, 108:489?496.	negative	T_water	not applicable (always)	TRUE	http://lipdverse.org/iso2k/1_0_0/MS14MOLS.html	LJ 20/02/2019
MS14MORR01b	MS14MORR	MS14MORR01b	MarineSediment	10.1038/NGEO2094	Moffa-Sanchez, P., Born, A., Hall, I. R., Thornalley, D. J. R. and Barker, S.: Solar forcing of North Atlantic surface temperature and salinity over the past millennium, Nature Geoscience, 7(4), 275–278, doi:10.1038/ngeo2094, 2014.			https://www.ncdc.noaa.gov/paleo/study/19804	61.4817	-19.536	2303	RAPID 17-5P North Atlantic	818.72	1793.38	d18O	permil	inferred seawater		inferred from G. inflata d18O and Mg/Ca	subsurface seawater		positive	d18O_seawater	not applicable (always)	TRUE	http://lipdverse.org/iso2k/1_0_0/MS14MORR.html	LJ 12/12/2018
MS14MORR01a	MS14MORR	MS14MORR01a	MarineSediment	10.1038/NGEO2094	Moffa-Sanchez, P., Born, A., Hall, I. R., Thornalley, D. J. R. and Barker, S.: Solar forcing of North Atlantic surface temperature and salinity over the past millennium, Nature Geoscience, 7(4), 275–278, doi:10.1038/ngeo2094, 2014.			https://www.ncdc.noaa.gov/paleo/study/19804	61.4817	-19.536	2303	RAPID 17-5P North Atlantic	818.72	1793.38	d18O	permil	carbonate	planktonic foraminifera	G. inflata (300355)	subsurface seawater	Urey, H. C. 1948. Oxygen isotopes in nature and in the laboratory. Science, 108:489?496.	negative	T_water	not applicable (always)	TRUE	http://lipdverse.org/iso2k/1_0_0/MS14MORR.html	LJ 20/02/2019
MS15BATP02	MS15BATP	MS15BATP02	MarineSediment	10.1016/j.marmicro.2015.03.001	Bartels-Jonsdottir, H. B., Voelker, A. H. L., Abrantes, F. G., Salgueiro, E., Rodrigues, T. and Knudsen, K. L.: High-frequency surface water changes in the Tagus prodelta off Lisbon, eastern North Atlantic, during the last two millennia, Marine Micropaleontology, 117, 13–24, doi:10.1016/j.marmicro.2015.03.001, 2015.			https://doi.pangaea.de/10.1594/PANGAEA.858741	38.55	-9.33	-90	Tagus prodelta	-155	2001	d18O	permil	carbonate	planktonic foraminifera	G. inflata (>250)	subsurface seawater	Urey, H. C. 1948. Oxygen isotopes in nature and in the laboratory. Science, 108:489?496.	negative	T_water	not applicable (always)	TRUE	http://lipdverse.org/iso2kv0_10_0/MS15BATP.html	LJ 12/12/2018
MS15BATP01	MS15BATP	MS15BATP01	MarineSediment	10.1016/j.marmicro.2015.03.001	Bartels-Jonsdottir, H. B., Voelker, A. H. L., Abrantes, F. G., Salgueiro, E., Rodrigues, T. and Knudsen, K. L.: High-frequency surface water changes in the Tagus prodelta off Lisbon, eastern North Atlantic, during the last two millennia, Marine Micropaleontology, 117, 13–24, doi:10.1016/j.marmicro.2015.03.001, 2015.			https://doi.pangaea.de/10.1594/PANGAEA.858741	38.55	-9.33	-90	Tagus prodelta	-155	2001	d18O	permil	carbonate	planktonic foraminifera	G. bulloides (>250)	surface seawater	Urey, H. C. 1948. Oxygen isotopes in nature and in the laboratory. Science, 108:489?496.	negative	T_water	not applicable (always)	TRUE	http://lipdverse.org/iso2kv0_10_0/MS15BATP.html	LJ 20/02/2019
MS14CCBC02	MS15VIBC	MS14CCBC02	MarineSediment	10.1002/2014PA002677	Voigt, I., Chiessi, C. M., Prange, M., Mulitza, S., Groeneveld, J., Varma, V. and Henrich, R.: Holocene shifts of the southern westerlies across the South Atlantic, Paleoceanography, 30(2), 39–51, doi:10.1002/2014pa002677, 2015.			https://doi.pangaea.de/10.1594/PANGAEA.841893	-32.5052	-50.2427	-657	Brazil Current	-11970	1965	d18O	permil	carbonate	planktonic foraminifera	G. truncatulinoides d ( 500-650)	subsurface seawater	Urey, H. C. 1948. Oxygen isotopes in nature and in the laboratory. Science, 108:489?496.	negative	T_water	not applicable (always)	TRUE	http://lipdverse.org/iso2k/1_0_0/MS15VIBC.html	LJ 12/12/2018
MS14CCBC01a	MS15VIBC	MS14CCBC01a	MarineSediment	10.1002/2014PA002677	Voigt, I., Chiessi, C. M., Prange, M., Mulitza, S., Groeneveld, J., Varma, V. and Henrich, R.: Holocene shifts of the southern westerlies across the South Atlantic, Paleoceanography, 30(2), 39–51, doi:10.1002/2014pa002677, 2015.			https://doi.pangaea.de/10.1594/PANGAEA.841893	-32.5052	-50.2427	-657	Brazil Current	-11970	1965	d18O	permil	carbonate	planktonic foraminifera	G. ruber white ss (250-350)	surface seawater	Urey, H. C. 1948. Oxygen isotopes in nature and in the laboratory. Science, 108:489?496.	negative	T_water	not applicable (always)	TRUE	http://lipdverse.org/iso2k/1_0_0/MS15VIBC.html	LJ 12/12/2018
MS14CCBC01b	MS15VIBC	MS14CCBC01b	MarineSediment	10.1002/2014PA002677	Voigt, I., Chiessi, C. M., Prange, M., Mulitza, S., Groeneveld, J., Varma, V. and Henrich, R.: Holocene shifts of the southern westerlies across the South Atlantic, Paleoceanography, 30(2), 39–51, doi:10.1002/2014pa002677, 2015.			https://doi.pangaea.de/10.1594/PANGAEA.841893	-32.5052	-50.2427	-657	Brazil Current	-11970	1965	d18O	permil	inferred seawater		inferred from G. ruber d18O and Mg/Ca	surface seawater		positive	d18O_seawater	not applicable (always)	TRUE	http://lipdverse.org/iso2k/1_0_0/MS15VIBC.html	LJ 12/12/2018
MS15VIBC01	MS15VIBC	MS15VIBC01	MarineSediment	10.1002/2014PA002677	Voigt, I., Chiessi, C. M., Prange, M., Mulitza, S., Groeneveld, J., Varma, V. and Henrich, R.: Holocene shifts of the southern westerlies across the South Atlantic, Paleoceanography, 30(2), 39–51, doi:10.1002/2014pa002677, 2015.			https://doi.pangaea.de/10.1594/PANGAEA.841893	-32.5052	-50.2427	-657	Brazil Current	-11970	1965	d18O	permil	carbonate	planktonic foraminifera	G. inflata (315-400)	subsurface seawater	Urey, H. C. 1948. Oxygen isotopes in nature and in the laboratory. Science, 108:489?496.	negative	T_water	not applicable (always)	TRUE	http://lipdverse.org/iso2k/1_0_0/MS15VIBC.html	LJ 20/02/2019
MS15VIBM01	MS15VIBM	MS15VIBM01	MarineSediment	10.1002/2014PA002677	Voigt, I., Chiessi, C. M., Prange, M., Mulitza, S., Groeneveld, J., Varma, V. and Henrich, R.: Holocene shifts of the southern westerlies across the South Atlantic, Paleoceanography, 30(2), 39–51, doi:10.1002/2014pa002677, 2015.			https://doi.pangaea.de/10.1594/PANGAEA.841893	-39.3017	-53.965	-3620	Brazil-Malvinas Confluence	-9380	1680	d18O	permil	carbonate	planktonic foraminifera	G. inflata (315-400)	subsurface seawater	Urey, H. C. 1948. Oxygen isotopes in nature and in the laboratory. Science, 108:489?496.	negative	T_water	not applicable (always)	TRUE	http://lipdverse.org/iso2k/1_0_0/MS15VIBM.html	LJ 12/12/2018
MS96LKSS02	MS96LKSS	MS96LKSS02	MarineSediment	10.1126/science.274.5292.1504	Keigwin, L. D.: The Little Ice Age and Medieval Warm Period in the Sargasso Sea, Science, 274(5292), 1504–1508, doi:10.1126/science.274.5292.1504, 1996.			https://www.ncdc.noaa.gov/paleo-search/study/2519	33.7	-57.62	4418	Sargasso Sea	-1165	1911.8	d18O	permil	carbonate	planktonic foraminifera	G. ruber (white) 150-250	surface seawater	Urey, H. C. 1948. Oxygen isotopes in nature and in the laboratory. Science, 108:489?496.	negative	T_water	not applicable (always)	TRUE	http://lipdverse.org/iso2k/1_0_0/MS96LKSS.html	LJ 12/12/2018
MS96LKSS01	MS96LKSS	MS96LKSS01	MarineSediment	10.1126/science.274.5292.1504	Keigwin, L. D.: The Little Ice Age and Medieval Warm Period in the Sargasso Sea, Science, 274(5292), 1504–1508, doi:10.1126/science.274.5292.1504, 1996.			https://www.ncdc.noaa.gov/paleo-search/study/2519	33.7	-57.62	4418	Sargasso Sea	-1165	1911.8	d18O	permil	carbonate	planktonic foraminifera	G. ruber (white) 150-250	surface seawater	Urey, H. C. 1948. Oxygen isotopes in nature and in the laboratory. Science, 108:489?496.	negative	T_water	not applicable (always)	TRUE	http://lipdverse.org/iso2k/1_0_0/MS96LKSS.html	LJ 20/02/2019
MS97HLCB04	MS97HLCB	MS97HLCB04	MarineSediment	10.1029/97PA00230	Lin, H.-L., Peterson, L. C., Overpeck, J. T., Trumbore, S. E. and Murray, D. W.: Late Quaternary climate change from δ18O records of multiple species of planktonic foraminifera: High-resolution records from the Anoxic Cariaco Basin, Venezuela, Paleoceanography, 12(3), 415–427, doi:10.1029/97pa00230, 1997.			https://www.ncdc.noaa.gov/paleo/study/2615	10.7	-64.94	-790	Cariaco Basin	-19293	1715	d18O	permil	carbonate	planktonic foraminifera	N. dutertrei 355-425	subsurface seawater	Urey, H. C. 1948. Oxygen isotopes in nature and in the laboratory. Science, 108:489?496.	negative	T_water	not applicable (always)	TRUE	http://lipdverse.org/iso2k/1_0_0/MS97HLCB.html	LJ 12/12/2018
MS97HLCB02	MS97HLCB	MS97HLCB02	MarineSediment	10.1029/97PA00230	Lin, H.-L., Peterson, L. C., Overpeck, J. T., Trumbore, S. E. and Murray, D. W.: Late Quaternary climate change from δ18O records of multiple species of planktonic foraminifera: High-resolution records from the Anoxic Cariaco Basin, Venezuela, Paleoceanography, 12(3), 415–427, doi:10.1029/97pa00230, 1997.			https://www.ncdc.noaa.gov/paleo/study/2615	10.7	-64.94	-790	Cariaco Basin	-19293	1715	d18O	permil	carbonate	planktonic foraminifera	G. ruber pink 212-300	surface seawater	Urey, H. C. 1948. Oxygen isotopes in nature and in the laboratory. Science, 108:489?496.	negative	T_water	not applicable (always)	TRUE	http://lipdverse.org/iso2k/1_0_0/MS97HLCB.html	LJ 12/12/2018
MS97HLCB03	MS97HLCB	MS97HLCB03	MarineSediment	10.1029/97PA00230	Lin, H.-L., Peterson, L. C., Overpeck, J. T., Trumbore, S. E. and Murray, D. W.: Late Quaternary climate change from δ18O records of multiple species of planktonic foraminifera: High-resolution records from the Anoxic Cariaco Basin, Venezuela, Paleoceanography, 12(3), 415–427, doi:10.1029/97pa00230, 1997.			https://www.ncdc.noaa.gov/paleo/study/2615	10.7	-64.94	-790	Cariaco Basin	-19293	1715	d18O	permil	carbonate	planktonic foraminifera	G. ruber white 212-250	surface seawater	Urey, H. C. 1948. Oxygen isotopes in nature and in the laboratory. Science, 108:489?496.	negative	T_water	not applicable (always)	TRUE	http://lipdverse.org/iso2k/1_0_0/MS97HLCB.html	LJ 12/12/2018
MS97HLCB01	MS97HLCB	MS97HLCB01	MarineSediment	10.1029/97PA00230	Lin, H.-L., Peterson, L. C., Overpeck, J. T., Trumbore, S. E. and Murray, D. W.: Late Quaternary climate change from δ18O records of multiple species of planktonic foraminifera: High-resolution records from the Anoxic Cariaco Basin, Venezuela, Paleoceanography, 12(3), 415–427, doi:10.1029/97pa00230, 1997.			https://www.ncdc.noaa.gov/paleo/study/2615	10.7	-64.94	-790	Cariaco Basin	-19293	1715	d18O	permil	carbonate	planktonic foraminifera	G. bulloides 212-250	surface seawater	Urey, H. C. 1948. Oxygen isotopes in nature and in the laboratory. Science, 108:489?496.	negative	T_water	not applicable (always)	TRUE	http://lipdverse.org/iso2k/1_0_0/MS97HLCB.html	LJ 20/02/2019
MS99LWSC01	MS99LWSC	MS99LWSC01	MarineSediment	10.1029/1999PA900028	Wang, L., Sarnthein, M., Grootes, P. M. and Erlenkeuser, H.: Millennial reoccurrence of century-scale abrupt events of East Asian Monsoon: A possible heat conveyor for the global deglaciation, Paleoceanography, 14(6), 725–731, doi:10.1029/1999pa900028, 1999.			https://www.ncdc.noaa.gov/paleo/study/2598	20.1167	117.383	-1727	South China Sea	-39182	1936	d18O	permil	carbonate	planktonic foraminifera	G. ruber s.s. (white) 315-400	surface seawater	Urey, H. C. 1948. Oxygen isotopes in nature and in the laboratory. Science, 108:489?496.	negative	T_water	not applicable (always)	TRUE	http://lipdverse.org/iso2kv0_10_0/MS99LWSC.html	LJ 12/12/2018
WEB8d8f0a7b	SH16MEIN	SH16MEIN01	MolluskShells	10.1002/lno.10252	Mette, M. J., Wanamaker, A. D., Carroll, M. L., Ambrose, W. G. and Retelle, M. J.: Linking large-scale climate variability withArctica islandicashell growth and geochemistry in northern Norway, Limnology and Oceanography, 61(2), 748–764, doi:10.1002/lno.10252, 2015.			https://www.ncdc.noaa.gov/paleo/study/20286	71.0622	24.0983	-6	Ingoya	1880	2012	d18O	permil	carbonate	mollusk	aragonite	surface seawater	The annual d18Oshell time series each show relatively strong, negative correlations with a broad swath of North Atlantic SSTs during the satellite era	negative	T_water	annual	TRUE	http://lipdverse.org/iso2k/1_0_0/SH16MEIN.html	DMT (12/31/19)
WEB477e36ed	SH18CASA	SH18CASA	MolluskShells	10.1007/s00382-018-4311-3	Carre, M., Azzoug, M., Zaharias, P., Camara, A., Cheddadi, R., Chevalier, M., Fiorillo, D., Gaye, A. T., Janicot, S., Khodri, M., Lazar, A., Lazareth, C. E., Mignot, J., Mitma Garcia, N., Patris, N., Perrot, O. and Wade, M.: Modern drought conditions in western Sahel unprecedented in the past 1600 years, Climate Dynamics, 52(3-4), 1949–1964, doi:10.1007/s00382-018-4311-3, 2018.			https://doi.org/10.1594/PANGAEA.892303	13.9	-16.6	5	Saloum shell middens	400	2010	d18O	permil	carbonate	mollusk	aragonite	surface seawater	We found that the correlations with d18O are 0.72 (with total pseudocoral), 0.47 (with SST component), and 0.68 (with SSS component), p < 0.01 for all three (Figure S1), indicating that SSS changes represent a larger fraction of the variance in the coral d18Oanomaly signal than SST changes, as expected from the larger magnitude of interannual SSS variations at this site. Testing several different…	positive	d18O_seawater	subannual	TRUE	http://lipdverse.org/iso2k/1_0_0/SH18CASA.html	DMT (1/14/19); KLD (12/31/19)
SL13TEAG01A	SL13TEAG	SL13TEAG01a	TerrestrialSediment	10.1016/j.gca.2012.10.040	Terwilliger, V. J., Eshetu, Z., Disnar, J.-R., Jacob, J., Paul Adderley, W., Huang, Y., Alexandre, M. and Fogel, M. L.: Environmental changes and the rise and fall of civilizations in the northern Horn of Africa: An approach combining δD analyses of land-plant derived fatty acids with multiple proxies in soil, Geochimica et Cosmochimica Acta, 111, 140–161, doi:10.1016/j.gca.2012.10.040, 2013.			this compilation	14.2704	39.4478	2493	Adigrat	-873	1465	d2H	permil	terrestrial biomarker	n-alkanoic acid	C26	soil water	precipitation occurs in closest proximity to the bulk of global cloud formation and its dD values are most influenced by its amount. dD values de- crease as precipitation amount increases (Risi et al., 2008). Additional factors shape the dD values of fatty acids in land-plants as well but their consideration below suggests that our dDn-C26 sequences were unambiguously if qualita- tively reflectin…	positive	P_isotope		TRUE	http://lipdverse.org/iso2k/1_0_0/SL13TEAG.html	BK 12/31/2019
SL13TEAK01A	SL13TEAK	SL13TEAK01A	TerrestrialSediment	10.1016/j.gca.2012.10.040	Terwilliger, V. J., Eshetu, Z., Disnar, J.-R., Jacob, J., Paul Adderley, W., Huang, Y., Alexandre, M. and Fogel, M. L.: Environmental changes and the rise and fall of civilizations in the northern Horn of Africa: An approach combining δD analyses of land-plant derived fatty acids with multiple proxies in soil, Geochimica et Cosmochimica Acta, 111, 140–161, doi:10.1016/j.gca.2012.10.040, 2013.			this compilation	13.3322	39.3646	2171	Adi Kolan	-11792	1950	d2H	permil	terrestrial biomarker	n-alkanoic acid	C26	soil water	precipitation occurs in closest proximity to the bulk of global cloud formation and its dD values are most influenced by its amount. dD values de- crease as precipitation amount increases (Risi et al., 2008). Additional factors shape the dD values of fatty acids in land-plants as well but their consideration below suggests that our dDn-C26 sequences were unambiguously if qualita- tively reflectin…	positive	P_isotope		TRUE	http://lipdverse.org/iso2k/1_0_0/SL13TEAK.html	BK 12/31/2019
SP03BMIL01A	SP03BMIL	SP03BMIL01A	Speleothem	10.1016/S0016-7037(02)01031-1	Bar-Matthews, M., Ayalon, A., Gilmour, M., Matthews, A. and Hawkesworth, C. J.: Sea–land oxygen isotopic relationships from planktonic foraminifera and speleothems in the Eastern Mediterranean region and their implication for paleorainfall during interglacial intervals, Geochimica et Cosmochimica Acta, 67(17), 3181–3199, doi:10.1016/s0016-7037(02)01031-1, 2003.	10.1006/qres.1997.1883	Bar-Matthews, M., Ayalon, A. and Kaufman, A.: Late Quaternary Paleoclimate in the Eastern Mediterranean Region from Stable Isotope Analysis of Speleothems at Soreq Cave, Israel, Quaternary Research, 47(2), 155–168, doi:10.1006/qres.1997.1883, 1997.	https://www.ncdc.noaa.gov/paleo/study/5423	32.58	35.03	400	Soreq Cave, Israel	-182000	2000	d18O	permil	carbonate	carbonate	calcite	groundwater	The modern analog supporting the association of enhanced rainfall with minimum speleothem I´18O values is the present-day relationship between decreasing rainfall I´18O and increasing annual rainfall amount (Fig. 4).	positive	P_isotope		TRUE	http://lipdverse.org/iso2k/1_0_0/SP03BMIL.html	LCB
SP04DEUS01A	SP04DEUS	SP04DEUS01A	Speleothem	10.1191/095968399674716399	Denniston, R. F., Gonzalez, L. A., Baker, R. G., Asmerom, Y., Reagan, M. K., Edwards, R. L. and Alexander, E. C.: Speleothem evidence for Holocene fluctuations of the prairie-forest ecotone, north-central USA, The Holocene, 9(6), 671–676, doi:10.1191/095968399674716399, 1999.			https://www.ncdc.noaa.gov/paleo/study/5428	44.8333	-92.25	332	Crystal Cave, Wisconsin	-911	1995	d18O	permil	carbonate	carbonate	calcite	groundwater	effects of temperature on d18O in rainfall and alterations of the d18O of soil- and ground water due to evaporation	positive	P_isotope	annual	TRUE	http://lipdverse.org/iso2k/1_0_0/SP04DEUS.html	LCB
SP04YUCN02A	SP04YUCN	SP04YUCN02A	Speleothem	10.1126/science.1091220	Yuan, D.: Timing, Duration, and Transitions of the Last Interglacial Asian Monsoon, Science, 304(5670), 575–578, doi:10.1126/science.1091220, 2004.			https://www.ncdc.noaa.gov/paleo-search/study/5427	25.28	108.08	680	Dongge Cave, China	-7970	1834	d18O	permil	carbonate	carbonate	calcite	groundwater	To estimate absolute amounts of rainfall integrated from sources to southeast China, we must make assumptions about absolute humidity in tropical source regions. Even assuming a glacial relative humidity as high as today?s and only a modest tropical temper- ature depression (2.5i¿½C), we calculate an ab- solute tropical glacial vapor pressure that is 85% of today?s and 79% of mid-Holocene/ Last I…	positive	P_isotope	annual	TRUE	http://lipdverse.org/iso2k/1_0_0/SP04YUCN.html	NM, ZK (07/01/2019)
SP05CRBR01A	SP05CRBR	SP05CRBR01A	Speleothem	10.1038/nature03365	Cruz, F. W., Burns, S. J., Karmann, I., Sharp, W. D., Vuille, M., Cardoso, A. O., Ferrari, J. A., Silva Dias, P. L. and Viana, O.: Insolation-driven changes in atmospheric circulation over the past 116,000 years in subtropical Brazil, Nature, 434(7029), 63–66, doi:10.1038/nature03365, 2005.			https://www.ncdc.noaa.gov/paleo/study/5431	-27.22	-49.16	230	Botuvera Cave, Brazil	-114210	1950	d18O	permil	carbonate	carbonate	calcite	groundwater	Thus, changes in convective intensity within the SASM/SACZ may significantly contribute to and reinforce the effect that the location of this system has on the d18O of precipitation.	positive	P_isotope	DJF	TRUE	http://lipdverse.org/iso2k/1_0_0/SP05CRBR.html	LCB
SP05MAAT01A	SP05MAAT	SP05MAAT01A	Speleothem	10.1016/j.epsl.2005.05.010	Mangini, A., Spoetl, C. and Verdes, P.: Reconstruction of temperature in the Central Alps during the past 2000 yr from a δ18O stalagmite record, Earth and Planetary Science Letters, 235(3-4), 741–751, doi:10.1016/j.epsl.2005.05.010, 2005.			https://www.ncdc.noaa.gov/paleo/study/5433	47.09	11.67	2531	Spannagel Cave, Austria	-90	1935	d18O	permil	carbonate	carbonate	white, densely crystalline low-Mg calcite, showing columnar-shape crystals in thin section	groundwater	Tuning delivers a high correlation between y18O in SPA 12 and D14C (r =0.61). The maxima of d18O coincide with solar minima (Dalton, Maunder, Sporer, Wolf, as well as with minima at around AD 700, 500 and 300).	positive	P_isotope	DJF	TRUE	http://lipdverse.org/iso2k/1_0_0/SP05MAAT.html	LCB
SP06DRIT01A	SP06DRIT	SP06DRIT01A	Speleothem	10.1130/G22103.1	Drysdale, R., Zanchetta, G., Hellstrom, J., Maas, R., Fallick, A., Pickett, M., Cartwright, I. and Piccini, L.: Late Holocene drought responsible for the collapse of Old World civilizations is recorded in an Italian cave flowstone, Geology, 34(2), 101, doi:10.1130/g22103.1, 2006.			https://www.ncdc.noaa.gov/paleo/study/5537	44	10	300	Buca della Renella, Italy Flowstone	-5051.3	680	d18O	permil	carbonate	carbonate	calcite	groundwater		positive	P_isotope		TRUE	http://lipdverse.org/iso2k/1_0_0/SP06DRIT.html	LCB
SP06DYCN01A	SP06DYCN	SP06DYCN01A	Speleothem	10.1016/j.epsl.2005.01.036	DYKOSKI, C., EDWARDS, R., CHENG, H., YUAN, D., CAI, Y., ZHANG, M., LIN, Y., QING, J., AN, Z. and REVENAUGH, J.: A high-resolution, absolute-dated Holocene and deglacial Asian monsoon record from Dongge Cave, China, Earth and Planetary Science Letters, 233(1-2), 71–86, doi:10.1016/j.epsl.2005.01.036, 2005.			https://www.ncdc.noaa.gov/paleo-search/study/5441	25.28	108.08	680	Dongge Cave, China	-13861.3	1966.5	d18O	permil	carbonate	carbonate	calcite	groundwater		positive	P_isotope	annual	TRUE	http://lipdverse.org/iso2k/1_0_0/SP06DYCN.html	LCB
SP07ASUS01A	SP07ASUS	SP07ASUS01A	Speleothem	10.1130/G22865A.1	Asmerom, Y., Polyak, V., Burns, S. and Rassmussen, J.: Solar forcing of Holocene climate: New insights from a speleothem record, southwestern United States, Geology, 35(1), 1, doi:10.1130/g22865a.1, 2007.			https://www.ncdc.noaa.gov/paleo/study/9739	32.083	-105.167	1244	pink Panter Cave, New Mexico	-10137	1965	d18O	permil	carbonate	carbonate	calcite	groundwater	observed negative correlation between summer monsoon rainfall amount and d18O	positive	P_isotope		TRUE	http://lipdverse.org/iso2k/1_0_0/SP07ASUS.html	LCB
SP07DEUS01A	SP07DEUS	SP07DEUS01A	Speleothem	10.1016/j.yqres.2007.04.001	Denniston, R. F., DuPree, M., Dorale, J. A., Asmerom, Y., Polyak, V. J. and Carpenter, S. J.: Episodes of late Holocene aridity recorded by stalagmites from Devil’s icebox Cave, Central Missouri, USA, Quaternary Research, 68(1), 45–52, doi:10.1016/j.yqres.2007.04.001, 2007.			https://www.ncdc.noaa.gov/paleo-search/study/15072	38.9	-92.3	250	Devils Icebox Cave, Missouri	-1649	1260	d18O	permil	carbonate	carbonate	calcite	groundwater	Increase of d13C may generally be associated with increase of the proportion of C4 plants in the vegetation or increase of the contribution of bedrock carbonate to the DIC - both are more likely in drier conditions. Stable d18O values suggest that changes in temperature were minor.	positive	P_isotope		TRUE	http://lipdverse.org/iso2k/1_0_0/SP07DEUS.html	LCB
[truncated: 121 more rows]

## Sheet: Supplementary Table 2
TSid	dataSetName	iso2kUI	pub1_doi	pub2_doi	pub3_doi	pub4_doi	pub5_doi	pub6_doi	pub1	pub2	pub3	pub4	pub5	pub6
Ocean2kHR_001	CO00COKY	CO00COKY01A	10.1126/science.287.5453.617	10.1002/2014PA002716					Cole, J. E.: Tropical Pacific Forcing of Decadal SST Variability in the Western Indian Ocean over the Past Two Centuries, Science, 287(5453), 617-619, doi:10.1126/science.287.5453.617, 2000.	Auer, G., Piller, W. E., Reuter, M. and Harzhauser, M.: Correlating carbon and oxygen isotope events in early to middle Miocene shallow marine carbonates in the Mediterranean region using orbitally tuned chemostratigraphy and lithostratigraphy, Paleoceanography, 30(4), 332-352, doi:10.1002/2014pa002716, 2015.
[truncated: 1,023 more rows]

## Sheet: Supplementary Table 3
Citations for records in Iso2k database v1.0.0
[truncated: 421 more rows]
