# Supplementary material for: The Iso2k database: a global compilation of paleo- δ 18 O and δ 2 H records to aid understanding of Common Era climate
Source: Copernicus journal article supplement (doi:10.5194/essd-12-2261-2020), 2020-09-23
Supplement: Supplementary file [file essd-12-2261-2020-supplement-title-page.pdf › essd-12-2261-2020-supplement-title-page.pdf]

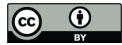

## *Supplement of*

# **The Iso2k database: a global compilation of paleo- $\delta^{18}\text{O}$ and $\delta^2\text{H}$ records to aid understanding of Common Era climate**

**Bronwen L. Konecky et al.**

*Correspondence to:* Bronwen L. Konecky ([bkonecky@wustl.edu](mailto:bkonecky@wustl.edu))

- [essd-12-2261-2020-supplement-title-page.pdf](#)
- [Iso2k\\_sampleCode.R](#)
- [Supplementary Materials - Tables.xlsx](#)
- [iso2k\\_sampleCode.m](#)
- [iso2k\\_sampleCode.py](#)

The copyright of individual parts of the supplement might differ from the CC BY 4.0 License.
